# Supplementary material for: Hippocampal-hypothalamic circuit controls context-dependent innate defensive responses
Source: eLife. 2022 Apr 14;11:e74736. doi: 10.7554/eLife.74736 (PMC9042231; doi:10.7554/eLife.74736)
Supplement: Figure 1—figure supplement 2—source data 1. — The effects of low- vs. high-frequency AHN stimulation. [file elife-74736-fig1-figsupp2-data1.xlsx]

## Sheet: ED Fig 2C
Jump (#)
Low Frequency (6Hz)
	GFP							ChR2
OFF	0	0	0	0	0	0	0	0	0	0	0	0	0
ON	0	0	0	0	0	0	0	0	0	0	0	0	0
OFF	0	0	0	0	0	0	0	0	0	0	0	0	0

## Sheet: ED Fig 2D
Freezing
Low Frequency (6Hz)
	GFP							ChR2
OFF	0	14	0	0	7	2.83333	0	1.83333	19	20.9167	14	23.9167	6.41667
ON	4.66667	13.5	3.66667	12.9167	8.08333	2.08333	0.583333	29.1667	97.0833	97.25	25	94.5	84.0833
OFF	1	0	5.16667	0.333333	0.333333	0	2.83333	24.5833	50.5833	16.5	25.5833	37.1667	56.9167

## Sheet: ED Fig2E
Speed
Low Frequency (6Hz)
	GFP								ChR2
OFF	0.033	0.056	0.07	0.053	0.014	0.015	0.066		0.039	0.033	0.026	0.056	0.03	0.036
ON	0.02	0.031	0.041	0.035	0.01	0.041	0.036		0.015	0.059	0.014	0	0.051	0.065
OFF	0.041	0.029	0.056	0.042	0.012	0.037	0.047		0.017	0.016	0.017	0.024	0.041	0.038

## Sheet: ED Fig 2F
Grooming
Low Frequency (6Hz)
	GFP								ChR2
OFF	5.6	0	0	5.1	6.6	6.3	4.8		6.9	5.7	33.7	5.7	15.7	1.6
ON	15.5	11.3	18.1	12.5	13.6	6.6	2.6		17.8	50	0.3	3.9	1.6	2.4
OFF	0.5	5	0	0	0	0	8.1		27.8	17.8	14.8	12.2	22	43.7

## Sheet: ED Fig2G
Rearing
Low Frequency (6Hz)
	GFP								ChR2
OFF	1.6	11	7.3	2.1	1.8	8.1	7.6		2.3	0.9	2.1	1.9	0.7	1.2
ON	1.1	11.8	19	7.8	8.5	5.8	20.5		3	0	0	1.2	2.1	0
OFF	15.2	11.5	22	15.3	14.8	9.4	27.2		7.9	1.8	8.4	13.3	7.5	7.5

## Sheet: ED Fig 2H
Jump (#)
High Frequency (20Hz)	GFP											ChR2
OFF	0	0	0	0	0	0	0					0	0	0	0	0	0
ON	0	0	0	0	0	0	0					8	52	7	23	3	5
OFF	0	0	0	0	0	0	0					0	0	0	0	0	0

## Sheet: ED Fig2I
Freezing
High Frequency (20Hz)	GFP											ChR2
OFF	0	0	0	0	0	0	0					10.5833	26.6667	0.666667	0	0.166667	10.5833
ON	29.75	0	0	0	6.75	3.08333	0					65.4167	77.5	61.0833	0	36.1667	65.4167
OFF	1.5	0	0	0	5.75	64	0					46	19.75	40.5	0	3.75	46

## Sheet: ED Fig 2J
Speed
High frequency (20Hz)	GFP								ChR2
OFF	0.0215417	0.0249	0.0477417	0.0536583	0.00250833	0.047925	0.02355		0.022825	0.03075	0.0121083	0.03675	0.0166333	0.022575
ON	0.0197	0.00949167	0.026325	0.0316583	0.0093	0.0606167	0.0287		0.0738667	0.183742	0.0461833	0.113308	0.076475	0.0539417
OFF	0.0105917	0.01705	0.032175	0.0309667	0.013325	0.051025	0.0160583		0.0184083	0.0018	0.004675	0.0264667	0.00368333	0.00551667

## Sheet: ED Fig 2K
Grooming
High Frequency (20Hz)	GFP											ChR2
OFF	0	0	12.1	0	3.3	8.5	0					7	11.8	4.2	6.1	9.3	3.6
ON	0	0	0	9.9	2.6	0	0					0	0.9	0	0	0	0
OFF	0	0	1.2	0	1.6	0	0					6.2	4.8	42.8	61.3	15.2	0.4

## Sheet: ED Fig 2L
Rearing
High Frequency (20HZ)	GFP											ChR2
OFF	37.1	22.8	9.8	3.9	8	27.4	2.5					13.9	2.5	22.3	13.5	14	4
ON	30.5	28.7	14.7	11.3	3.7	37.1	17.6					0.3	4.9	2.1	0.2	0	0
OFF	14.7	7.1	5.1	2.8	5.1	21.3	13.6					0	14.1	1.7	0	1.8	0
