# Supplementary material for: Hippocampal-hypothalamic circuit controls context-dependent innate defensive responses
Source: eLife. 2022 Apr 14;11:e74736. doi: 10.7554/eLife.74736 (PMC9042231; doi:10.7554/eLife.74736)
Supplement: Figure 1—source data 1. — AHN stimulation induces escape-associated behaviors. [file elife-74736-fig1-data1.xlsx]

## Sheet: Easy escape condition
Fig 1E			Fig 1F			Fig 1G
Speed Increase			Freezing (s)			Jumps (#)
GFP	ChR2		GFP	ChR2		GFP	ChR2
-0.04466	0.527881		29.75	61.0833		0	8
-0.44803	0.713276		0	42.1667		0	52
-0.28915	0.58456		4.16667	36.1667		0	7
-0.25786	0.51019		4.16667	51.1667		0	23
0.575159	0.64271		6.75	65.4167		0	3
0.116929	0.409932		12.5	82.6667		0	5
0.098565			1.66667			0

## Sheet: Hard escape condition
Fig 1H			Fig 1I			Fig 1J
Speed Increase			Freezing (s)			Jumps (#)
GFP	ChR2		GFP	ChR2		GFP	ChR2
-0.13514	0.081967		0	42.6667		0	29
-0.07317	0.789474		0	46.5833		0	6
0.073171	0.269231		1.25	38.6667		0	19
0.014493	0.666667		0	47.9167		0	1
0.111111	0.428571		46.5833	43.8333		0	22
0.073171	0.870968		1.66667	24.25		0	14
0.22449			1.66667			0

## Sheet: Impossible escape condition
GFP						ChR2
0	0	0	0			0.75	0.25	0.25	0.5	0.625	0.5
0	0	0.4	0.4			0.8	0.4	0.8	0.4	0.4	0.2
0.8	0.3	0.3	0.3			0.5	0	0.9	0.3	0.2	0.5
0.1	0	0	0			1	0.3	1	0.6	0.1	0.3
0.5	0.5	0	0			0.6	0.2	0.5	0.5	0.1	0.6
0.2	0.2	0.2	0.2			0.7	0.5	1	0.6	0	0.2
0	0.4	0.3	0.3			0.6	0.3	0.4	0.6	0.4	0.3
0.3	0.1	0	0			1	0.7	0.7	0.5	0.2	0
0.6	0.3	0	0			0.6	0	0.4	0.5	0.5	0.5
0	0.3	0.2	0.2			0.5	0.6	0.9	0.5	0.6	0.5
0.4	0.4	0.3	0.3			0.4	0	0.7	0.4	0.7	0.5
0	0.3	0	0			0.9	0.6	1	0.5	0.4	0.5
0.6	0.2	0	0			0.5	0.3	0.5	0.4	0.7	0.4
0.2	0.5	0.2	0.2			1	0.4	0.9	0.3	0.2	0.4
0	0	0	0			0.6	0	0.3	0.4	0.7	0.6
0.2	0.5	0	0			1	0.5	0.9	0.5	0.6	0.3
0.1	0.2	0	0			0.6	0.7	0.7	0.6	0.4	0.1
0.3	0	0	0			0.7	0.3	0.6	0.4	0.4	0.6
0.5	0.3	0.4	0.4			0.7	0.2	0.2	0.4	0.4	0.3
0	0.3	0	0			1	0.6	1	0.5	0.3	0.2
0.2	0	0	0			0.8	0.5	0.6	0.2	0.6	0.6
0.2	0.1	0	0			0.9	0.6	0.8	0.6	0.1	0.3
0.2	0.1	0	0			0.5	0.9	0.2	0.4	1	0.8
0.2	0.5	0	0			1	0	1	0.5	1	0.7
0	0	0.2	0.2			0.8	0.1	0.5	0.4	0.5	0.4
0.3	0	0	0			0.6	1	0.8	0.5	0.5	0.6
0.2	0.2	0	0			0.4	0.2	0.6	0.5	0.4	0.4
0.3	0	0.2	0.2			1	0.5	0.7	0.5	0.4	0.3
0.3	0.7	0.3	0.3			0.7	0.2	0.5	0.2	0.4	0.1
0.1	0	0	0			1	0.6	0.9	0.4	0.1	0.7
0	0	0	0			0.8	0.4	0.4	0.4	0	0.3
0.3	0	0.5	0.5			1	0.3	1	0.5	0.1	0.2
0.3	0	0.3	0.3			0.4	0.8	0.7	0.3	0.7	0.5
0	0	0.2	0.2			0.9	0.3	1	0.5	0	0.8
0.4	0.1	0	0			0.5	0.4	0.6	0.3	0.4	0.9
0.3	0	0.2	0.2			0.7	0.3	0.6	0.4	0.2	0.7
0.5	0.5	0	0			0.5	0	0.2	0.3	0.7	0.5
0	0.1	0	0			1	0.8	1	0.5	0.4	0.5
0.5	0.3	0	0			0.6	0.7	0.2	0	0.8	0.3
0.3	0	0	0			1	0.3	0.7	0.5	0.5	0.1
0.2	0.6	0	0			0.7	0.3	0.5	0.2	0	0.6
0.7	0.1	0	0			1	0.6	1	0.5	0.5	0.1
0.4	0.1	0.2	0.2			1	0.2	0.2	0.4	0.4	0.5
0.3	0	0	0			1	0.7	1	0.5	0.3	0.3
0	0	0.3	0.3			0.5	0.5	0.4	0.4	0.5	0.3
0.2	0	0	0			1	0.4	1	0.3	0.5	0.4
0.5	0.2	0	0			0.6	0.1	0.5	0.2	0.4	0.4
0.3	0.2	0	0			0.6	0.5	1	0.4	0.7	0.3
0.1	0.4	0	0			0.5	0.4	0.5	0.3	1	0.2
0.2	0.2	0	0			1	0.6	1	0.4	0.1	0.1
0.2	0	0	0			0.4	0.4	0.5	0	0.5	0.5
0.2	0	0	0			0.7	0.5	1	0.4	0.5	0.2
0.5	0.2	0.2	0.2			0.7	0.6	0.1	0.4	0.1	0.3
0.3	0	0	0			0.7	0.7	1	0.4	0.5	0.2
0.3	0.1	0	0			0.5	0.1	0.6	0.4	0.1	0.5
0.5	0.3	0.2	0.2			1	0.5	1	0.5	0.4	0.2
0.6	0	0.3	0.3			0.7	0.2	0.5	0.5	0.3	0.7
0.5	0.6	0	0			1	0.5	1	0.5	1	0.1
0	0.2	0.7	0.7			0.7	0.4	0.5	0.3	0.6	0.4
0	0.2	0.2	0.2			0.8	0.1	0.9	0.5	0.5	0.5
0.1	0.2	0.2	0.2			0.4	0.3	0.4	0.3	0.9	0.5
0.2	0.2	0.3	0.3			1	0.3	1	0.4	0.8	0.5
0	0	0.1	0.1			0.5	0.2	0.7	0.5	0.2	0.4
0	0.3	0.1	0.1			1	0.2	1	0.5	0.2	0.7
0.1	0.3	0	0			0.5	0.4	0.4	0.4	0.4	0.3
0.1	0	0	0			1	0.6	1	0.4	0.2	0.2
0.4	0.2	0	0			0.8	0.6	0.3	0.1	0.7	0.3
0.6	0	0	0			0.7	0.3	1	0.4	0.4	0.3
0.4	0.2	0	0			0.7	0.5	0.6	0.4	1	0.2
0.3	0	0.2	0.2			1	0.2	1	0.3	1	0.4
0	0.4	0.2	0.2			0.9	0.6	0.6	0.3	0.2	0.2
0.2	0	0.2	0.2			0.8	0.6	0.7	0.5	0.6	0.3
0.5	0	0	0			0.7	0.3	0.8	0.5	0.8	0.3
0.3	0.2	0	0			1	0.2	0.9	0.5	0.5	0.2
0.2	0	0	0			0.4	0	0.6	0.5	0.8	0.3
0.1	0.2	0	0			0.7	0.6	0.6	0.4	0.5	0.6
0.3	0.4	0.3	0.3			0.5	0.4	0.8	0.3	0.6	0.3
0.1	0.2	0	0			1	0.6	1	0.4	0.2	0.7
0	0.2	0	0			0.7	0.1	0.3	0	0.3	0.3
0.2	0.1	0	0			0.9	0.5	0.8	0.5	0.6	0.6
0	0.2	0	0			0.4	0.6	0.5	0.3	0.5	0.3
0.7	0.3	0	0			0.7	0.5	0.6	0.4	0.3	0.6
0	0	0.1	0.1			0.4	0.3	0.3	0	1	0.6
0.7	0	0.5	0.5			0.8	0.5	1	0.5	0.5	0.8
0	0.3	0.1	0.1			0.4	0.4	0.6	0.6	0.9	0.2
0	0.3	0	0			0.9	0.7	0.4	0.5	0.9	0.2
0	0.2	0	0			0.4	0.4	0.7	0.4	1	0.5
0.3	0	0.1	0.1			1	0.2	1	0.5	0.6	0.2
0	0.1	0	0			0.5	0	0.7	0.4	0.9	0.5
0.6	0.6	0	0			1	0.6	1	0.5	0.2	0.8
0.3	0	0.3	0.3			0.5	0.5	0.8	0.3	0.7	0.1
0.1	0.6	0.1	0.1			0.9	0.7	0.6	0.5	0.8	0.3
0	0.3	0.4	0.4			0.5	0.3	0.2	0.1	0.4	0.2
0	0.2	0.4	0.4			1	0.5	0.4	0.6	0.3	0.7
0.3	0.1	0.2	0.2			0.7	0.2	0.2	0.7	0.8	0.1
0.2	0	0	0			1	0.5	0.6	0.5	0.5	0.7
0.3	0.1	0.1	0.1			0.9	0.3	0.8	0.4	0.8	0.2
0.1	0.2	0	0			1	0.5	0.7	0.3	0.8	0.1
0	0.5	0	0			0.7	0.5	1	0.5	0.3	0.2
0	0.4	0	0			1	0.7	0.2	0.5	0	0.2
0.2	0.3	0	0			0.4	0.4	0	0.3	0.4	0.3
0.1	0.5	0.3	0.3			1	0.6	0	0.4	0.6	0
0.2	0.4	0	0			0.7	0.3	0.2	0.5	1	0.6
0.1	0	0	0			0.8	0.7	0.6	0.1	0.5	0.6
0.5	0.5	0.3	0.3			0.8	0.3	0.3	0.6	0.7	0.5
0.2	0.4	0.3	0.3			1	0.4	0.5	0.4	0.6	1
0.9	0.6	0.4	0.4			0.9	0.8	0.2	0.5	1	0.8
0.2	0	0.1	0.1			0.8	0.6	0.6	0.4	0.7	0.4
0.1	1	0.1	0.1			0.5	0.4	1	0.6	1	0.2
0.6	0.7	0	0			1	0.5	0.6	0.5	0.4	0.7
0.3	0.8	0	0			0.6	0.7	0.2	0.2	1	0.4
0.2	0	0	0			0.5	0.5	0.3	0.5	0.4	0.8
0.2	0.2	0	0			0.5	0.4	0.1	0.3	0.8	0.1
0.3	0.2	0.3	0.3			1	0.5	0.5	0.4	0.3	0.7
0.5	0	0.2	0.2			0.4	0.5	0	0.4	0.6	0.3
0.7	0	0.3	0.3			0.7	0.4	0.4	0.6	0.7	0.6
0.4	0.1	0	0			0.5	0.6	0.2	0.2	1	0.2
0.5	0.8	0.2	0.2			1	0.4	0.3	0.5	0.7	0.6
0.7	0.4	0.5	0.5			0.8	0.3	0	0.3	0.8	0
0.2	0.8	0.4	0.4			1	0.3	0.4	0.3	0.7	0.4
0.4	0	0	0			0.4	0.5	0.3	0.2	0.8	0
0.4	0.1	0	0			1	0.5	0.3	0.4	0.1	0.6
0.3	0.5	0	0			0.3	0.8	0.3	0.3	0.5	0.2
0.4	0.3	0	0			1	0.5	0.4	0.5	0.7	0.6
0.4	0.5	0	0			0.3	0.3	0	0.6	0.4	0.2
0.6	0.5	0	0			1	0.7	0.5	0.4	0.8	0.9
0.2	0	0.1	0.1			0.7	0.4	0	0.3	0.8	0.4
0.2	0.3	0	0			1	0.2	0.4	0.5	0.8	0.4
0	0.4	0	0			0.4	0.1	0	0.5	0.9	0
0	0.2	0	0			0.9	0.5	0.3	0.6	0.5	0.8
0.4	0	0	0			0.3	0.5	0	0.4	0.7	0.3
0.2	0.7	0	0			0.9	0.5	0.5	0.4	0.8	0.8
0	0	0	0			0.9	0.3	0.2	0.6	0.7	0.4
0.3	0					1	0.6	0.4	0.5	0.6	0.5
0.5	0					0.4	0.5	0	0.3	0.9	0.5
0.5	0					1	0.3	0.4	0.3	0.8	0.7
0	0.6					0.4	0.7	0.3	0.4	1	0.2
0.3	0.6					1	0.5	0.5	0.3	0.5	0.6
0	0.3					0.7	0.7	0.3	0.2	0.6	0.2
0.1	0.3					1	0.3	0.4	0.5	0.6	0.7
0.1	0.3					0.9	0.4	0.25	0.5	0.9	0.2
0.5	0.1					1	0.5		0.5	0.7	0.6
0.2	0.5					0.5	0		0.5	0.8	0
0.3	0					0.9	0.5		0.3	0.4	0.3
0.4	0.1					0.3	0		0.6	1	0
0.2	0.4					0.9	0.8		0.3	0.6	0.7
0.3	0.1					0.4	0		0.7	1	0.3
0.4	0					1	0.5		0.3	0.7	0.8
0.4	0.1					0.8	0.2		0.3	0.8	0.1
0	0					1	0.6		0.4	0.7	0.6
0.6	0					0.3	0.2		0.7	0.9	0.4
0.3	0					1	0.5		0.2	0.7	0.8
0	0.2					0.4	0.3		0.6	0.7	0.3
0.5	0					1	0.4		0.3	0.9	0.8
0	0.2					0.7	0.2		0.3	0.8	0.1
0	0.3					1	0.3		0.6	0.9	0.8
0.2	0.6					0.7	0.5		0.4	0.8	0.6
0.2	0.4					1	0.6		0.5	0.6	0.5
0.7	0.2					0.5	0.4		0.5	0.6	0.3
0.5	0.4					1	0.5		0.5	0.6	0.6
0	0.3					0.4	0.8		0.1	0.8	0.3
0	0.7					1	0.7		0.4	0.8	0.6
0.2	0.5					0.6	0.4		0.5	0.7	0.2
0	0.2					1	0.5		0.4	0.6	0.8
0.2	0.4					0.4	0.4		0.4	0.9	0.4
0.3	0.8					0.8	0.6		0.4	0.1	0.6
0.1	0					0.2	0.4		0.4	0.5	0.4
0.3	0.1					1	0.7		0.6	0.3	0.5
0.2	0					0.4	0.6		0	0.6	0
0.7	0.2					0.7	0.8		0.5	0.2
0.6	0					0.3	0.7		0.1	0.4
0.6	0.5					1	0.5		0.4	0.4
0.4	0.1					0.2	0.8		0.2	0.7
0	0					1	0.6		0.5	0.5
0.4	0					0.2	0.4		0.4	0.7
0.2						0.6	0.4		0.5	0.6
0.3						0.4	0.3		0.9	1
0.7						1	0.5		0.3	0.2
0						0.6	0.2		0.4	0.6
0.5						1	0.5		0.166667	0.4
0.2
0
0.5
0
0.2
0.3
0.4
0
