# Supplementary material for: Hippocampal-hypothalamic circuit controls context-dependent innate defensive responses
Source: eLife. 2022 Apr 14;11:e74736. doi: 10.7554/eLife.74736 (PMC9042231; doi:10.7554/eLife.74736)
Supplement: Figure 2—source data 1. — AHN stimulation is aversive and induces conditioned place aversion. [file elife-74736-fig2-data1.xlsx]

## Sheet: Habituation
Fig 2C			Fig 2D
Habituation Chamber pref			Distance Travelled
GFP	ChR2		GFP	ChR2
-0.0633333	0.0933333		11.907	10.11
0.492	-0.014		6.066	2.221
-0.0386667	0.0333333		11.826	16.499
-0.263333	-0.0153333		16.976	14.032
-0.117333	-0.00466667		10.981	6.758
-0.07	0.248667		11.278	10.039
-0.157333	0.0873333		6.99	14.056
0.213333	0.0553333		5.576	4.018
0.313333	1		5.549	11.301
0.0966667	0.619333		2.908	6.51
0.514	0.244		8.177	13.544
0.123333	-0.15		3.829	8.794
-0.606667			9.461
-0.288			7.174
Note: the habituation results are pooled for 6 and 20 Hz treatments

## Sheet: RTPA
Fig 2F
Pref. index	GFP 6Hz											GFP 20 Hz											ChR2-6hz											ChR2- 20 hz
0-5 min	0.0846667	-0.442	-0.07	0.0366667	0.056	0.115	0.083					-0.114667	0.194667	-0.0833333	0.328	0.818	0.148	-0.300667					-0.0866667	-0.393333	-0.255333	-0.603333	-0.376667	-0.325333						-0.728667	-0.928	-0.878667	-0.912	-0.840667	-0.993333
5-10 min	-0.242	0.0386667	-0.208667	-0.0493333	-0.116	0.168	0.114					-0.168	0.266	-0.114667	0.186	0.378667	0.0713333	-0.27					-0.851333	-0.566667	-0.618667	-0.537333	-0.821333	-0.597333						-0.704	-0.910667	-0.840667	-0.950667	-0.850667	-0.984
10-15 min	-0.467333	-0.197333	-0.0626667	-0.211333	-0.15	-0.026	0.485					0.026	0.258	-0.484667	0.406667	0.316	-0.212667	-0.211333					-0.901333	-0.482667	-0.953333	-0.592	-0.737333	-0.8						-0.692	-0.940667	-0.906	-0.946667	-0.906667	-0.986
15-20 min	-0.0006667	-0.112	-0.0546667	-0.382	0.247333	0.114	0.234					-0.114	0.269333	-0.236667	0.0273333	0.842667	-0.262	-0.775333					-0.912	-0.654667	-0.744	-0.621333	-0.834667	-0.825333						-0.724	-0.936667	-0.931333	-0.956	-0.944667	-1
Fig 2G
Distance travelled
GFP 6 Hz	ChR2 6 Hz	GFP 20 Hz	ChR2 20 Hz
43.565	10.624	24.522	21.003
12.272	48.382	11.925	73.004
26.802	6.44	16.066	36.503
29.505	34.644	28.944	24.839
28.456	13.387	29.818	16.286
27.07	11.505	11.925	29.515
11.896		17.554

## Sheet: CPA
Fig 2H					Fig 2I
Conditioned Aversion					Distance travelled
GFP 6 Hz	ChR2 6 Hz	GFP 20 Hz	ChR2 20 Hz		GFP 6 Hz	ChR2 6 Hz	GFP 20 Hz	ChR2 20 Hz
0.0831974	-0.136174	-0.325397	-0.441235		5.262	8.286	6.865	3.36
-0.18916	-0.128338	0.0449148	-0.284243		6.289	6.289	5.349	3.107
-0.286351	-0.154459	-0.224556	-0.488474		8.031	7.659	6.896	6.485
0.176295	-0.239219	-0.0986425	-0.725531		5.5	6.373	6.246	2.338
0.0653018	-0.20947	0.0133657	-0.568776		8.915	3.817	4.652	5.119
0.061554	-0.277193	0.156749	-0.647763		3.864	8.784	5.544	11.32
0.0588235		0.160071			6.066		2.69
