# Supplementary material for: Hippocampal-hypothalamic circuit controls context-dependent innate defensive responses
Source: eLife. 2022 Apr 14;11:e74736. doi: 10.7554/eLife.74736 (PMC9042231; doi:10.7554/eLife.74736)
Supplement: Figure 3—figure supplement 2—source data 1. — Viral expression of the anterograde tracer ChR2-eYFP. [file elife-74736-fig3-figsupp2-data1.xlsx]

## Sheet: ED Fig 4F
EPSC amplitude
mCherry+	mCherry-
40.53	326.9
145.14	157.59
149.9	130
50.54	102.66
181.64	179.32
492.43	98.27
144.9	55.54
163.09	140.01
36.5	172.73
26.12	15.38

## Sheet: ED Fig4G
mCherry+	mCherry-
1.7	1.68
1.2	1.32
2.6	2.19
3.05	2.11
0.55	0.9
1.2	0.9
0.3	5.38
1.45	7.65
1.67	4.06
0.75	0.76

## Sheet: ED Fig4H
mCherry+
	Before (1s)	During (1s)	After (1s)
	0.6	17	5.8
	0.8	0	1.6
	1	0.2	3
	0	16.8	3
	0	1	0
	0	4	0
	0	11	0.2
	0	1.8	0.6
	0	16	7
	0	4	0

## Sheet: ED Fig4I
mCherry-
	Before (1s)	During (1s)	After (1s)
	0.2	14.8	3.8
	0.2	26.2	8.2
	2.75	12	0.5
	0	1.6	0
	0.2	1	0.6
	0	4.6	1
	0	6.4	0
	0	0	0
	1.4	5.8	1.4
	0	0	0
