# Supplementary material for: Hippocampal-hypothalamic circuit controls context-dependent innate defensive responses
Source: eLife. 2022 Apr 14;11:e74736. doi: 10.7554/eLife.74736 (PMC9042231; doi:10.7554/eLife.74736)
Supplement: Figure 3—source data 1. — Hippocampus sends monosynaptic excitatory inputs to the anterior hypothalamic nucleus. [file elife-74736-fig3-data1.xlsx]

## Sheet: Fig 3C
AHN
0.452578	2.57329	1.88106	1.92019	2.57329	2.49586	1.78929
VMHdm/c
0.001588	0.021502	0.01468	0.00604	0.001269	0.023451	0.133343
PMD
0.027776	0.000935	0.01155	0.064882	0.080907	0.0073
PVN
0.003037	0.001457	0.000485	0	0.003631	5.43e-05	0.003037
VMHvl
0.053533	0.023451	0.28049	0.160112	0.172206	0.000811	0.457281
VMHsh
0.239119	0.613848	1.00062	0.582653	0.151972	0.151972	0.044299

## Sheet: Fig 3G
	ePSC
170217-C3-WI	596.863
170511-C5-WI	65.2908
170515-C1-WI	177.944
170515-C3-WI	197.314
170511-0004-JS	133.202
170511-0014-JS	156.395
170511-0020-JS	100.633
170515-0004-JS	33.9199
170515-0011-JS	104.716
170515-0016-JS	119.897
170516-0008-JS	119.43
170404-0005-JS	52.2378
170217-0007-JS	54.6521
170217-0023-JS	27.6421
170217-0034-JS	43.5043

## Sheet: Fig 3H
	Latency
170217-C3-WI	2.72571
170511-C5-WI	2.41979
170515-C1-WI	2.14617
170515-C3-WI	3.47976
170511-0004-JS	3.3392
170511-0014-JS	3.39966
170511-0020-JS	2.96037
170515-0004-JS	3.97556
170515-0011-JS	3.63407
170515-0016-JS	3.45525
170516-0008-JS	3.79683
170404-0005-JS	4.07185
170217-0007-JS	2.00022
170217-0023-JS	6.33442
170217-0034-JS	5.89487

## Sheet: Fig3 I
	Time	P1	P2
	0	123.505	48.0656
	0.0833333	172.428	44.1324
	0.166667	101.019	69.8916
	0.25	125.312	26.6797
	0.333333	229.429	76.1089
	0.416667	160.178	43.4789
	0.5	106.554	35.9971
	0.583333	111.359	27.8633
	0.666667	82.2083	76.1048
	0.75	96.9875	52.0656
	0.833333	153.294	43.3083
	0.916667	150.094	47.1888
	1	171.199	69.0262
	1.08333	164.576	91.0896
	1.16667	109.528	82.1838
	1.25	114.353	52.4631
	1.33333	237.26	68.6808
	1.41667	163.098	81.9217
	1.5	138.388	72.5919
	1.58333	134.474	73.1948
	1.66667	165.952	31.3087
	1.75	246.978	61.7971
	1.83333	194.262	53.2713
	1.91667	96.116	96.9705
	2	108.99	50.1522
	2.08333	142.721	56.2957
	2.16667	173.201	79.2065
	2.25	161.506	36.6285
	2.33333	178.792	27.0582
	2.41667	124.993	30.9986
	2.5	219.867	55.3164
	2.58333	147.004	85.9686
	2.66667	168.586	63.8494
	2.75	120.645	72.5494
	2.83333	132.745	65.1181
	2.91667	232.638	48.0673
	3	132.897	78.087
	3.08333	150.11	52.8196
	3.16667	174.681	31.7363
	3.25	103.555	16.7629
	3.33333	158.659	61.7348
	3.41667	153.943	60.9253
	3.5	133.121	51.944
	3.58333	154.439	33.8334
	3.66667	128.325	62.4068
	3.75	182.932	68.3076
	3.83333	222.078	60.9449
	3.91667	179.877	49.7503
	4	114.246	32.2151
	4.08333	138.623	65.869
	4.16667	160.498	71.9969
	4.25	173.937	65.2949
	4.33333	150.64	48.8337
	4.41667	174.965	19.6912
	4.5	74.9411	92.2751
	4.58333	139.621	80.2951
	4.66667	129.696	34.6029
	4.75	122.678	61.5204
	4.83333	114.58	86.2597
	4.91667
Picro	5	169.984	60.1206
	5.08333	138.892	96.1671
	5.16667	145.487	126.81
	5.25	102.738	58.5481
	5.33333	90.2499	60.7089
	5.41667	211.623	58.5465
	5.5	154.908	68.4824
	5.58333	166.343	61.6063
	5.66667	163.52	66.7178
	5.75	196.226	75.6209
	5.83333	142.812	103.261
	5.91667	63.7053	60.4094
	6	143.133	116.155
	6.08333	145.09	65.1344
	6.16667	136.391	65.8347
	6.25	197.696	34.2441
	6.33333	199.061	54.5293
	6.41667	110.174	59.027
	6.5	152.161	88.562
	6.58333	190.964	52.0481
	6.66667	151.808	41.456
	6.75	113.565	71.3287
	6.83333	197.673	69.0112
	6.91667	127.695	121.714
	7	195.326	58.2414
	7.08333	84.7214	81.1814
	7.16667	180.155	77.0054
	7.25	124.29	63.9877
	7.33333	151.132	78.5001
	7.41667	118.927	163.483
	7.5	88.9426	101.028
	7.58333	151.064	142.153
	7.66667	160.811	92.2074
	7.75	203.194	59.395
	7.83333	108.09	107.846
	7.91667	151.293	83.7881
	8	127.083	58.2351
	8.08333	146.296	64.5091
	8.16667	169.834	86.8263
	8.25	135.01	91.5528
	8.33333	103.091	91.2502
	8.41667	135.88	127.091
	8.5	156.026	55.928
	8.58333	117.207	88.2769
	8.66667	158.262	79.6485
	8.75	153.343	92.1861
	8.83333	156.038	61.5553
	8.91667	64.9164	89.6967
	9	162.879	24.5729
	9.08333	161.534	29.0877
	9.16667	120.278	88.1734
	9.25	121.171	63.0655
	9.33333	131.577	103.989
	9.41667	129.527	77.5249
	9.5	89.7417	70.0883
	9.58333	150.023	89.1098
	9.66667	161.146	38.9538
	9.75	83.9469	75.1578
	9.83333	91.6269	62.9404
	9.91667	182.772	68.8804
DNQX	10	111.811	66.1571
	10.0833	164.826	106.11
	10.1667	155.773	60.1917
	10.25	127.196	82.3959
	10.3333	89.353	77.268
	10.4167	159.149	57.2202
	10.5	153.699	76.9167
	10.5833	147.414	47.9271
	10.6667	96.8373	61.3149
	10.75	106.587	88.1547
	10.8333	78.4381	127.388
	10.9167	137.32	61.7588
	11	158.013	117.485
	11.0833	154.963	46.3203
	11.1667	89.9176	97.2418
	11.25	96.4959	104.186
	11.3333	143.699	33.9575
	11.4167	125.723	51.5041
	11.5	97.5689	106.846
	11.5833	170.515	45.0267
	11.6667	80.0854	67.268
	11.75	200.588	89.748
	11.8333	145.35	86.6341
	11.9167	137.497	82.9314
	12	165.295	67.5171
	12.0833	107.875	71.742
	12.1667	147.695	64.8088
	12.25	188.855	45.0559
	12.3333	91.2678	88.5822
	12.4167	149.575	41.2985
	12.5	155.258	91.6593
	12.5833	83.7988	73.0566
	12.6667	132.104	126.611
	12.75	147.335	58.1013
	12.8333	171.704	81.1274
	12.9167	147.223	96.0757
	13	140.42	55.2148
	13.0833	123.041	66.2787
	13.1667	95.996	100.146
	13.25	91.7497	55.861
	13.3333	90.6574	49.7639
	13.4167	157.564	39.4
	13.5	107.403	103.985
	13.5833	117.844	62.6677
	13.6667	82.0771	57.663
	13.75	121.678	30.6136
	13.8333	67.9789	54.0628
	13.9167	102.771	13.1717
	14	62.6331	49.2054
	14.0833	87.1613	40.2863
	14.1667	73.4505	36.4632
	14.25	60.5955	29.9558
	14.3333	60.4739	32.1536
	14.4167	33.5709	31.3736
	14.5	42.0486	19.7097
	14.5833	54.7986	35.1453
	14.6667	23.7583	34.8667
	14.75	22.6529	27.4136
	14.8333	28.8591	30.9343
	14.9167	27.2838	23.8658
DNQX	15	22.9982	10.9132
	15.0833	14.5891	23.5003
	15.1667	10.3922	10.148
	15.25	9.93387	17.5022
	15.3333	13.2837	13.4058
	15.4167	8.56599	9.54255
	15.5	10.3638	11.3404
	15.5833	11.4386	13.5138
	15.6667	12.0225	12.5107
	15.75	16.8938	13.72
	15.8333	16.8613	7.82806
	15.9167	17.1131	15.5262
	16	10.9455	10.213
	16.0833	12.9157	8.27699
	16.1667	3.99606	7.29196
	16.25	13.1234	8.1185
	16.3333	12.0525	8.51248
	16.4167	11.5159	13.5911
	16.5	12.0266	8.73071
	16.5833	5.71779	14.2627
	16.6667	11.4494	11.2053
	16.75	9.4601	10.3146
	16.8333	10.5677	13.0091
	16.9167	11.9367	11.2043
	17	10.5601	13.1235
	17.0833	11.1523	9.07705
	17.1667	13.0285	5.82639
	17.25	8.13684	8.38098
	17.3333	8.86312	6.54379
	17.4167	10.51	9.16726
	17.5	8.54664	11.5984
	17.5833	6.65605	8.85332
	17.6667	8.53375	8.28961
	17.75	4.49053	9.73955
	17.8333	11.6167	8.68698
	17.9167	2.00574	9.32996
	18	12.4297	6.6924
	18.0833	10.0301	8.32109
	18.1667	7.74688	4.81719
	18.25	7.31898	11.4694
	18.3333	16.5069	14.1875
	18.4167	8.3522	15.6764
	18.5	9.17213	12.2239
	18.5833	11.9362	9.4948
	18.6667	10.2509	11.5937
	18.75	6.50622	6.62829
	18.8333	8.12461	6.78184
	18.9167	5.67735	7.87462
	19	7.1116	7.1116
	19.0833	5.8964	7.84953
	19.1667	8.63295	9.97572
	19.25	8.26507	9.11956
	19.3333	10.8874	11.3757
	19.4167	11.9079	8.36788
	19.5	4.49514	7.79103
	19.5833	7.82259	7.94466
	19.6667	5.31648	4.09577
	19.75	8.70433	6.38499
	19.8333	12.1019	9.17218
	19.9167	8.26756	8.87791
Picro	20

## Sheet: Fig 3J
	Basline	Picro	DNQX +Picro
170404-0002	49.8992	113.2	4.66863
170511-0000	129.679	125.92	32.415
170511-0012	149.357	136.618	8.905
170511-0018-WI	66.897	94.153	20.581

## Sheet: Fig 3 K
	Time	P1	P2
	0	97.7832	120.366
	0.0833333	125.684	120.313
	0.166667	104.739	74.9537
	0.25	144.851	63.4305
	0.333333	124.789	93.6607
	0.416667	122.126	69.6358
	0.5	114.195	76.4758
	0.583333	111.296	69.5482
	0.666667	117.485	92.2165
	0.75	134.617	83.4697
	0.833333	85.7108	67.1562
	0.916667	148.499	64.8813
	1	155.136	72.0057
	1.08333	89.8036	118.978
	1.16667	152.947	45.4036
	1.25	150.038	88.7585
	1.33333	160.837	84.5433
	1.41667	125.943	77.1153
	1.5	141.49	53.2329
	1.58333	148.784	32.5735
	1.66667	127.427	68.4673
	1.75	67.2668	127.57
	1.83333	131.093	94.5944
	1.91667	130.836	49.5373
	2	130.335	101.404
	2.08333	108.789	51.9041
	2.16667	135.101	30.8531
	2.25	126.665	42.1927
	2.33333	149.782	63.7227
	2.41667	83.8866	64.2332
	2.5	151.277	57.4047
	2.58333	171.177	88.5352
	2.66667	113.821	72.5615
	2.75	164.33	84.9842
	2.83333	90.7034	51.6409
	2.91667	171.722	56.9758
	3	155.096	101.263
	3.08333	87.4717	97.3594
	3.16667	109.706	39.149
	3.25	88.2145	86.6276
	3.33333	90.1212	63.5099
	3.41667	63.6152	111.345
	3.5	147.946	12.3261
	3.58333	90.9242	67.8529
	3.66667	131.154	66.579
	3.75	122.291	44.6543
	3.83333	124.512	88.1348
	3.91667	129.449	45.5864
	4	109.579	62.3378
	4.08333	86.3476	103.804
	4.16667	94.4213	65.4907
	4.25	88.6502	111.477
	4.33333	86.0356	93.3598
	4.41667	125.349	109.235
	4.5	101.228	101.472
	4.58333	122.757	87.8451
	4.66667	127.459	95.2327
	4.75	79.1576	75.1292
	4.83333	114.063	116.382
	4.91667	107.305	33.6969
TTX	5	117.312	58.596
	5.08333	133.809	58.0032
	5.16667	117.762	26.331
	5.25	122.597	75.8444
	5.33333	82.0975	99.6757
	5.41667	85.0368	105.056
	5.5	83.5752	144.244
	5.58333	123.987	65.76
	5.66667	128.898	103.141
	5.75	85.5396	108.733
	5.83333	89.8246	63.7016
	5.91667	114.895	74.7336
	6	81.5814	53.9935
	6.08333	159.161	101.3
	6.16667	104.133	77.1558
	6.25	84.2262	96.067
	6.33333	130.984	66.5305
	6.41667	133.103	59.4949
	6.5	114.156	74.2394
	6.58333	42.5367	144.221
	6.66667	168.174	60.5076
	6.75	130.784	106.614
	6.83333	129.048	67.5245
	6.91667	78.2177	88.3496
	7	113.901	69.7119
	7.08333	128.32	72.0456
	7.16667	113.926	57.5291
	7.25	113.6	103.224
	7.33333	88.9179	69.3866
	7.41667	107.68	66.0543
	7.5	107.572	92.1911
	7.58333	142.247	53.1357
	7.66667	97.2937	70.6823
	7.75	132.294	70.404
	7.83333	54.6987	118.541
	7.91667	109.895	77.3028
	8	99.5699	80.4048
	8.08333	69.4348	83.9612
	8.16667	117.035	60.7611
	8.25	72.0012	70.0481
	8.33333	83.4794	53.3281
	8.41667	81.9407	71.5647
	8.5	71.0143	50.5065
	8.58333	75.9072	71.5126
	8.66667	107.733	63.0548
	8.75	133.637	63.0805
	8.83333	82.8251	89.4169
	8.91667	84.8323	46.6243
	9	72.9191	70.844
	9.08333	49.9423	67.2762
	9.16667	73.5323	85.129
	9.25	62.3112	91.9743
	9.33333	74.2818	4.70176
	9.41667	78.3955	54.2255
	9.5	3.55223	89.2456
	9.58333	2.55877	77.2658
	9.66667	2.36821	53.5157
	9.75	4.47771	18.0275
	9.83333	2.85508	2.12266
	9.91667	2.37938	17.0278
4AP	10	1.99225	21.8897
	10.0833	4.88484	25.7589
	10.1667	1.82193	46.8659
	10.25	21.5848	25.1248
	10.3333	1.34236	2.56306
	10.4167	0.865046	1.96368
	10.5	3.32509	3.32509
	10.5833	1.75117	2.60567
	10.6667	1.39814	64.3864
	10.75	3.39793	3.15379
	10.8333	2.62443	3.47893
	10.9167	2.84788	7.24241
	11	20.151	13.6812
	11.0833	2.53395	3.02223
	11.1667	3.09317	2.36075
	11.25	3.35181	3.47388
	11.3333	9.76269	1.95019
	11.4167	1.10877	12.2172
	11.5	16.02	2.83644
	11.5833	3.2671	5.95264
	11.6667	2.317	10.8619
	11.75	3.50489	15.9561
	11.8333	3.50827	5.70554
	11.9167	2.74253	5.306
	12	2.56085	56.2718
	12.0833	2.71529	27.3735
	12.1667	3.69075	25.4193
	12.25	18.9511	2.71581
	12.3333	18.0615	23.1885
	12.4167	38.1022	10.7584
	12.5	1.6591	1.90324
	12.5833	13.7118	4.0682
	12.6667	12.3346	14.1657
	12.75	12.8538	31.2864
	12.8333	13.3625	18.3674
	12.9167	12.3992	70.6267
	13	31.5486	8.59935
	13.0833	29.1432	15.9596
	13.1667	64.8018	22.3214
	13.25	62.6731	42.5315
	13.3333	18.3151	15.5075
	13.4167	25.9089	15.0446
	13.5	90.3412	48.227
	13.5833	14.4568	77.0789
	13.6667	90.8849	43.3996
	13.75	16.0613	70.1385
	13.8333	75.0321	43.9042
	13.9167	74.9405	55.7755
	14	22.781	63.1862
	14.0833	3.53063	70.4252
	14.1667	71.025	35.3805
	14.25	69.3225	44.5422
	14.3333	96.445	70.6882
	14.4167	116.795	43.9194
	14.5	105.062	63.1923
	14.5833	98.1197	69.6774
	14.6667	86.1494	58.3174
	14.75	103.406	57.7512
	14.8333	105.457	54.6756
	14.9167	108.23	61.9649
4AP	15	129.776	84.6096
	15.0833	141.801	47.319
	15.1667	110.732	96.9378
	15.25	170.952	44.7317
	15.3333	157.588	66.0354
	15.4167	103.478	96.8865
	15.5	106.281	36.0909
	15.5833	135.427	72.3164
	15.6667	148.267	52.6859
	15.75	132.278	60.5005
	15.8333	130.436	34.2442
	15.9167	162.782	51.8204
	16	137.813	51.9974
	16.0833	97.644	92.517
	16.1667	135.193	76.477
	16.25	181.694	45.5853
	16.3333	140.813	80.1444
	16.4167	156.62	52.6163
	16.5	139.524	57.1264
	16.5833	134.376	107.032
	16.6667	118.872	82.0066
	16.75	132.538	51.6055
	16.8333	149.706	73.5344
	16.9167	149.331	91.1037
	17	53.4616	56.0251
	17.0833	140.787	69.2543
	17.1667	140.451	88.3269
	17.25	169.329	74.1142
	17.3333	145.505	73.2397
	17.4167	141.561	70.5162
	17.5	149.628	81.2683
	17.5833	152.774	74.4044
	17.6667	179.618	82.2062
	17.75	158.689	59.0796
	17.8333	143.19	48.5854
	17.9167	144.949	45.5842
	18	138.481	67.3136
	18.0833	164.194	71.298
	18.1667	146.465	51.739
	18.25	160.325	60.7151
	18.3333	158.419	74.5572
	18.4167	95.502	33.1241
	18.5	143.126	44.9817
	18.5833	136.616	66.5474
	18.6667	143.319	59.4569
	18.75	149.907	83.9894
	18.8333	143.021	78.8117
	18.9167	136.619	54.3438
	19	143.898	64.6741
	19.0833	156.142	58.1197
	19.1667	147.335	58.5896
	19.25	143.971	77.9308
	19.3333	154.861	81.131
	19.4167	146.067	87.1073
	19.5	142.448	96.6721
	19.5833	132.346	80.4664
	19.6667	121.759	92.3401
	19.75	160.561	62.6604
	19.8333	179.037	43.2947
	19.9167	142.508	51.3213
Picro	20

## Sheet: Fig3 L
	Basline	TTX	4AP+TTX
170515-0003	30.076	5.206	47.116
170515-0010	98.074	29.132	72.227
170515-0015	116.521	4.761	144.762
170515-0002_WI	197.216	46.904	231.43
170516-0006	111.342	6.034	61.169
