# Supplementary material for: Hippocampal-hypothalamic circuit controls context-dependent innate defensive responses
Source: eLife. 2022 Apr 14;11:e74736. doi: 10.7554/eLife.74736 (PMC9042231; doi:10.7554/eLife.74736)
Supplement: Figure 4—figure supplement 2—source data 1. — The effects of low- vs. high-frequency HPC→AHN pathway activation. [file elife-74736-fig4-figsupp2-data1.xlsx]

## Sheet: ED Fig5C
Jump (#)
Low Frequency (6Hz)	GFP										ChR2
OFF	0	0	0	0	0	0	0	0	0	0	0	0	0	0	0	0	0	0	0	0
ON	0	0	0	0	0	0	0	0	0	0	0	0	0	0	0	0	0	0	0	0
OFF	0	0	0	0	0	0	0	0	0	0	0	0	0	0	0	0	0	0	0	0

## Sheet: ED Fig5D
Freezing
Low Frequency (6Hz)	GFP										ChR2
OFF	0	0	0	0	2.16667	0.916667	5.58333	4.33333	5.08333	0	0	0	0	0	0.833333	2.08333	11.8333	16.1667	0	0
ON	0	0	0	0	2.58333	0	6.08333	5.58333	5.66667	0	0	0	0	0	0	2.58333	5.33333	15.6667	0	0
OFF	0	0	0	0	6.91667	12.75	3.5	0	22.0833	0	8.66667	0	0	0	6.75	2.16667	27.0833	2.08333	1.66667	0

## Sheet: ED Fig 5E
Speed(m/s)
Low Frequency (6Hz)	GFP									ChR2
OFF	0.083625	0.072075	0.117958	0.060883	0.04285	0.050258	0.018208	0.024717	0.040333	0.055842	0.056825	0.119308	0.112442	0.095425	0.064042	0.044058	0.028	0.014675	0.081842	0.023442
ON	0.054092	0.074175	0.069075	0.062525	0.033725	0.07845	0.031483	0.043783	0.032575	0.035442	0.084225	0.140692	0.107358	0.066867	0.072583	0.025967	0.03725	0.0061	0.0683	0.093033
OFF	0.026317	0.06685	0.052033	0.072392	0.04435	0.065017	0.046825	0.054158	0.022183	0.060617	0.029783	0.095117	0.090675	0.066667	0.04425	0.033475	0.017258	0.023792	0.052367	0.045675

## Sheet: ED Fig 5F
Grooming
Low Frequency (6Hz)
	GFP											6 Hz ChR2
OFF	7.1	1.5	3.7	9.2	10	17.7	7.9	9.1	7.1	7.9		2.9	1.8	0	4.9	4.4	5.4	8	13.5	0.9	11.6
ON	10.2	5.4	26.1	24.9	8.2	2.5	15.2	9.9	10.6	1.5		0	0	4.9	9	0	0.4	0	19.9	5	0
OFF	1.5	17.1	8.2	1.9	20.6	13.7	0.5	0.7	25.5	0		18.1	4.2	0	0	10.1	3.2	8.2	0	9.4	1.6

## Sheet: ED Fig 5G
Rearing
High Frequency (20Hz)
	GFP										ChR2
OFF	16.7	13.5	25.5	32.2	18.2	0	15.6	16.4	10.9	21.2	25.5	20.6	3.2	9.6	27.8	8.8	0.6	24.2	23.2	13
ON	14.1	10.3	36.3	20.7	10.4	1.1	10.3	17	19.6	18.2	23.9	0	0.7	6.9	32.4	20.5	2.1	35.4	39.5	12.5
OFF	19.5	4.6	32.9	22.3	16.7	1.6	10.9	20.9	14	16.7	32.2	2.4	0.8	45.4	17.8	26.3	9.7	16.1	15.9	12.7

## Sheet: ED Fig 5H
Jump (#)
High Frequency (20Hz)	GFP										ChR2
OFF	0	0	0	0	0	0	0	0	0	0	0	0	0	0	0	0	0	0	0	0
ON	0	0	0	0	0	0	0	0	0	0	0	0	0	0	0	0	0	0	0	0
OFF	0	0	0	0	0	0	0	0	0	0	0	0	0	0	0	0	0	0	0	0

## Sheet: ED Fig5I
Freezing
High Frequency (20Hz)	GFP										ChR2
OFF	3.08333	0	0	0	5.33333	25.4167	8.75	0	18.0833	10.9167	0	0	0	6.58333	19.25	5.91667	59.3333	1.66667	4.91667	1.5
ON	6	1.83333	10.3333	6.5	1.33333	1.5	0	2	13.0833	2.91667	0	1.83333	0	2.75	0	0	26.4167	2.75	6.5	1.41667
OFF	0	0	0	0	2.5	23.5	1	0	23.5	12.6667	0	4.5	0	0	6.58333	1.16667	4.25	15.5	3.75	0.916667

## Sheet: ED Fig5J
Speed (m/s)
High Frequency (20Hz)	GFP										ChR2
OFF	0.026858	0.045917	0.04225	0.05885	0.0272	0.0634	0.058842	0.061	0.02245	0.025167	0.047967	0.06355	0.093433	0.048258	0.027525	0.029067	0.010258	0.030983	0.051925	0.04465
ON	0.020692	0.044017	0.026842	0.0436	0.021658	0.04855	0.06405	0.045517	0.01965	0.0456	0.099725	0.044517	0.163375	0.039775	0.104408	0.033983	0.039667	0.034975	0.063058	0.068792
OFF	0.050542	0.03175	0.048317	0.041525	0.032892	0.06075	0.066425	0.053933	0.023317	0.027733	0.029175	0.11475	0.089592	0.065167	0.059425	0.016242	0.035967	0.0143	0.055633	0.025175

## Sheet: ED Fig 5K
Grooming
High Frequency (20Hz)
	GFP										ChR2
OFF	8.3	1.3	1.2	1.5	4.6	16.9	7.7	0	12.8	21.5	0.7	0	0	8.5	0.2	11.8	5.8	1.2	13.6	0.2
ON	14.6	3.2	12.5	0	41.6	9	0.6	8.9	4.3	3	1.2	0	4.8	28.4	0	0.5	24.8	1.5	5.8	17.2
OFF	0	38	1	15.9	20.7	6.9	0	0	13.5	20.4	3.3	13.2	0	0	0	0	0	20	1.6	9.5

## Sheet: ED Fig5L
Rearing
Low Frequency (6Hz)
	GFP
OFF	7.7	1	4.5	6.5	9	0.7	9.5	2.6	9.9	16.1		8	4.3	0	1.7	7.2	1	0.3	2	9.9	4.3
ON	21.6	8.6	14.9	16.6	11	3.7	6.3	8.5	7.7	31.3		24.5	5.6	2.9	20	20.5	5.8	2.7	2.4	30.6	13.9
OFF	4.5	13	26.2	27.7	3.7	1	7	12.4	6.8	26.3		14.5	7.3	1.8	18.3	21.9	7.4	4.4	18.4	22.3	19
