# Supplementary material for: Hippocampal-hypothalamic circuit controls context-dependent innate defensive responses
Source: eLife. 2022 Apr 14;11:e74736. doi: 10.7554/eLife.74736 (PMC9042231; doi:10.7554/eLife.74736)
Supplement: Figure 4—source data 1. — HPC→AHN pathway activation induces escape-associated locomotion. [file elife-74736-fig4-data1.xlsx]

## Sheet: Sheet1
	Figure Title	Figure 4. HPC→AHN pathway activation induces escape-associated locomotion
	Tab page
	Easy escape condition	e, Condition 1: speed increase from the light OFF epoch to ON epoch. GFP 6 Hz vs. ChR2 6 Hz (unpaired t-test, two-tailed, t=0.2281, df= 18, p= 0.8222, NS). GFP 20 Hz vs. ChR2 20 Hz (unpaired t-test, two-tailed, t=4.366, df=18, ***p=0.0004). f, Condition 1: freezing time during the light ON epoch. 6Hz GFP vs. 6Hz ChR2 (unpaired t-test, two-tailed, t=0.2035, df=18, p=0.8271, NS). 20Hz GFP vs. 20 Hz…
	Impossible escape condition	i, Condition 2: struggle movement during the 30 minutes of physical restraint (unpaired t-test, two-tailed, t=6.685, df=424 ****p<0.0001).

## Sheet: Easy escape condition
Fig 2E					Fig 2F
Speed increase					Freezing (s)
GFP 6 Hz	ChR2 6 Hz	GFP 20 Hz	ChR2 20 Hz		GFP 6 Hz	ChR2 6 Hz	GFP 20 Hz	ChR2 20 Hz
-0.21445	0.194257	-0.12968	0.350449		0	0	6	0
0.014359	0.082244	-0.02112	0.287156		0	0	1.83333	1.83333
-0.26136	-0.02313	-0.22301	0.27235		0	0	10.3333	0
0.013303	-0.17597	-0.14885	0.149073		0	0	6.5	2.75
-0.11916	0.062519	-0.11343	0.582743		2.58333	2.58333	1.33333	0
0.219035	-0.25836	-0.13265	0.077976		0	5.33333	1.5	0
0.267147	0.141762	0.042382	0.589053		6.08333	15.6667	0	26.4167
0.278345	-0.41276	-0.14536	0.060518		5.58333	0	2	2.75
-0.10641	-0.09019	-0.06651	0.096823		5.66667	0	13.0833	6.5
-0.22348	0.597482	0.288742	0.212814		0	0	2.91667	1.41667
Fig 2G					Fig 2H
Rearing (s)					Grooming (s)
6Hz GFP	6 Hz ChR2	20 Hz GFP	20 Hz ChR2		6Hz GFP	6 Hz ChR2	20 Hz GFP	20 Hz ChR2
21.6	24.5	14.1	23.9		10.2	0	14.6	1.2
8.6	5.6	10.3	0		5.4	0	3.2	0
14.9	2.9	36.3	0.7		26.1	4.9	12.5	4.8
16.6	20	20.7	6.9		24.9	9	0	28.4
11	20.5	10.4	32.4		8.2	0	4	0
3.7	5.8	1.1	20.5		2.5	0.4	9	0.5
6.3	2.7	10.3	2.1		15.2	0	0.6	24.8
8.5	2.4	17	35.4		9.9	19.9	8.9	1.5
7.7	30.6	19.6	39.5		10.6	5	4.3	5.8
31.3	13.9	18.2	12.5		1.5	0	3	17.2

## Sheet: Impossible escape condition
GFP									ChR2
0.9	0.5	0.5	0.7	0.8	0	0.4			0.7	0	0.6	0.5	1	0.3	0.9	0.6	0.5
0	0.1	0.2	0	0.6	0.1	0.3			0.3	0.3	0.5	0.4	0.7	0	0.6	0	0
0	0.4	0.2	0	0	0.4	0.8			1	0.5	0.3	0.7	0.4	0.6	1	0.6	0.3
0.2	0	1	0.6	0	0.5	0.2			0.4	0.8	0.3	0.5	0	0.3	1	0.5	0.4
0	0	0.6	0.3	0	0.9	0.4			0.2	0.2	0.9	0.5	1	0	1	0.2	0.6
0.3	0.2	0.2	0.5	0.3	0.1	0.7			0.5	0	0.1	1	0.9	0	0	0.1	0.1
0.4	0	0.2	0.5	0	0.6	0.2			0.7	0.2	0.4	0.8	0.4	0.1	0.3	0	0.4
0	0.4	0	0.1	0.3	0.1	0			0.3	0.7	0.3	0.4	0.9	0.2	0	0	0.4
0.1	0	0	0.3	0.2	0	0.3			0.5	0.9	0.2	0.4	0.9	0	0.2	0.1	0.2
0	0	0.2	0	1	0.3	0			0.3	0.6	0	0.2	1	0.4	0.1	0	0.2
0.3	0	0	0	0	0.3	0.3			0.2	1	0.3	0.7	1	0.3	0.3	0.1	0.3
0	0	0	0	0.1	0	0.4			0.3	0.8	0.3	0.4	0.2	0.6	0.2	0	0.1
0	0.2	0.7	0.1	0.4	0.4	0.2			0.6	1	0	0.2	0	0.5	0.6	0.4	0
0	0.4	0.5	0.8	0.6	0	0			0.1	0	0.6	0	0.1	0.1	0	0.2	0
0	0.1	0.5	0.3	0.2	0	0.3			0	0.7	0.4	0	0	0.2	0.2	0.4	0.2
0	0.3	0.6	0.5	0	0.2	0.5			0.6	1	0	0.3	0.2	0.3	0.9	0	0.3
0.7	0	0	0	0	0	0.3			0.4	0.6	0.2	0.2	0.5	0.2	0.6	0.4	0.2
0	0	0.3	0.4	0.1	0.2	0.2			0	0.4	0.4	0	0.5	0.2	0.6	0.3	0.7
0.5	0	0.3	0	0	0.3	0.5			0	0.8	0	0.1	0.8	0.5	0.9	0.5	0.3
0.5	0.5	0.4	0	0.2	0.2	0.6			0.6	0.6	0.7	0	1	0.2	0.5	0.4	0.9
0	0.3	0.4	0	0	0	0.5			0.4	0.4	0	0.4	0.5	0.4	0	0.5	0.6
0.4	0.4	0.2	0.1	0.9	0.8	0.9			0.6	0.1	0.2	0	0.3	0.4	0	0.7	0.9
0	0	0.2	0.3	0.3	0	0.3			0	0.2	0.6	0.4	1	0	0	0.7	0.5
0	0.5	0.3	0	0.7	0.2	0.4			0	0.1	0	0.1	0.7	0.3	0	0.3	0
0	0.4	0.2	0.2	0.2	0.6	0			0.3	0.1	0.1	0.6	0.7	0.3	0	0.6	0.3
0.4	0	0.3	0.2	0.2	0	0			0	0.4	0.2	0.8	0.8	0.7	0.3	0.6	0.4
0.4	0.2	0.3	0	0.5	0.5	0.6			0.3	0.5	0.3	0.3	1	0	0.3	0	0.1
0.2	0.4	0.2	0.4	0.5	0	0.5			0.2	0.8	0.3	0	0.4	0.7	0	0.6	0.5
0.5	0.2	0	0	0.4	0.5	0			0	0.2	0.3	0.8	1	0.4	0.3	0	0.2
0.3	0.1	0.4	0	0.6	0	0.6			0.4	1	0	0.1	0.1	0.4	0.1	0.3	1
0.4	0.1	0	0.2	0.2	0.4	0			0.2	0.7	0	0.2	0.5	0.3	0	0	1
0.5	0.3	0.6	0	0.9	0.7	0.6			0	0.1	0.3	0.4	1	0.5	0.6	0.6	1
0	0.1	0	0.1	0.3	0	0.6			0.4	0.6	0.5	0.1	0	0.4	0	0.4	0.6
0	0	0.2	0	0.4	0.8	0.7			0	0.5	0.5	0.4	0	0.4	0	0.3	0.3
0.3	0.4	0	0.4	0.8	0.3	0.9			0	1	0	0.3	0.9	0.4	0.3	0.2	1
0	0.5	0	0.3	0.5	0	0.4			0.3	1	1	0.2	0.1	0.9	0	0	0
0.3	0	0.7	0.2	0.6	0.3	0.6			0	0.9	0	1	0.4	0.8	0.5	0.6	0.3
0.9	0	0.2	0.3	0.6	0.5	0.2			0.1	0.4	0	1	0.2	0.3	0.3	0.3	0.4
0	0.2	0.3	0.4	0.6	0.2	0.5			0	1	0.1	0.7	0.3	0.2	0.4	0.3	0.7
0.2	0.1	0.6	0	0	0.2	0.6			0.1	0.7	0	0	0.4	0.8	0.2	0.3	0.2
0	0.2	0.5	0	0.3	0.4	0.4			0	0.8	0.3	0.1	0.2	0.5	0.7	0.3	0.7
0.2	0.2	0.3	0.3	0.5	0	0.3			0.2	0.8	0.2	0.3	0.8	0	0.4	0.3	0.5
0	0	0.4	0	0.3	0	0.9			0.3	0.5	0.8	0.3	0.9	0.3	0.8	0.4	0.6
0	0.5	0.5	0.1	0.1	0.3	0.5			0.4	1	0.7	0.3	1	0.6	0.8	0.7	0.4
0	0.6	0	0.3	0.2	0	0.3			0.4	1	0.1	0.2	0	0.3	0.4	0.1	0.7
0	0	0	0	0.6	0	0.8			0.3	0.8	0	0.4	0.6	0	0.8	0	0
0	0.5	0	0.2	0.5	0.2	0.2			0.5	0.9	0.3	0.9	0.4	0.6	0	0.2	0.3
0	0	0.7	0.5	1	0.3	0.7			0	1	1	1	0.2	0.2	0.4	0.2	0.2
0.5	0.3	0.4	0.1	0	0.4	0.5			0.3	0.9	0	0.4	0	0.2	0.1	0.1	0.4
0	0.1	0.2	0	0.2	0.3	0.8			0	1	0	0.6	0.8	0.6	0.5	0.7	1
0	0	0.9	0.4	0.4	0.4	0.5			0	1	0.3	0.8	0.9	0.4	0.7	0.5	0.8
0.1	0.4	0.4	0	0.5	0.6	0.6			0.2	1	0.9	0.2	1	0.3	0.7	0.6	0.7
0.2	0.3	0.7	0.3	0	0.6	0.7			0.2	1	0.8	0.1	0.3	0.2	0	0.4	0.4
0.1	0	0.3	0.5	0.8	0.4	0.8			0	0.4	0.9	0.6	0.1	0.3	1	0.7	0.6
0	0.1	0.8	0.2	0.5	0.7	0.1			0	0.8	0.1	0.4	0.1	0.7	0.8	0.5	0.5
0	0	0.7	0	0.1	0.3	0.1			0	0.6	0	0	1	0	0.1	0	0.5
0.1	0	0.3	0.2	0	0.8	0			0.5	0.7	0	0.4	0.6	0.2	0.5	0.3	0.1
0.2	0.4	0.3	0.6	0	0.8	1			0.1	1	1	0.2	0.8	0	0	0.2	0.6
0	0.2	0	0.3	0.3	0.1	0.5			0.2	0.2	0.8	0.4	0.1	0.3	0	0.2	0.4
0	0	0.4	0.2	0.2	0.2	0.6			0.4	0.7	1	0.9	0.3	0.2	0	0.9	0.6
0	0	0.6	0.2	0.9	0.6	0.4			0.1	0.5	1	0.2	0.2	0.6	0.5	0.3	0.4
0	0	0	0.4	0	0.7	0			0.4	1	1	0.8	0.6	0.9	0.7	0.2	0.8
0.2	0	0.4	0	0	0.3	0.5			0.4	1	0.8	0	0.4	0.4	0.5	0.2	0.6
0	0	0.6	0.1	0.8	0	0.6			0.3	1	0.5	1	0.4	0.3	0.3	0.6	0.5
0	0	0.3	0.4	0.8	0	0.4			0.1	0.3	0.5	0.5	0.8	0	0.5	0.5	0.3
0.2	0.5	0	0.3	0.6	0.4	0.8			0.3	1	0.2	0.7	1	0	0.4	0	0.6
0.2	0	0.6	0.2	1	0.8	0.3			0	0.7	0.1	0	0.4	0.3	0.3	0.3	0.4
0.2	0	0.6	0.2	0.7	0	0.2			0.6	1	0.9	0.2	0.5	0.2	0.1	0.3	0.3
0.4	0	0	0.2	0.6	0	0.3			0	0.6	0.6	0	0.2	0.3	0.4	0.4	0.9
0.1	0.2	0.5	0	0.2	0	0.7			0.1	0.8	0.4	0.7	0.9	0.4	0.4	0.4	0.8
0.1	0	0.5	0.5	0	0	0.6			0.3	0.5	0.4	0.5	1	0.2	0.8	0.4	0.4
0.2	0.7	0.4	0.3	0.5	0	0.6			0	0	0	0.8	1	0.2	0.3	0.4	0.5
0.1	0	0.6	0.3	0.4	0	0.5			0.6	0	0	0.2	0.6	0.3	0.2	0.3	0.9
0.2	0	0.7	0.2	0	0	0.4			0.2	0.1	0.2	0.5	0.1	0.6	0.2	0.2	0.9
0	0.2	0.3	0.2	0.7	0	0			0.5	0.1	0	0.6	0.7	0.3	0	0.3	0.8
0.3	0.3	0.3	0	0	0	0.5			0.1	0.3	0	0.3	0.4	0.5	0.6	0.5	0.5
0.4	0	0.2	0	0.8	0	0			0.5	0	0	1	1	0.3	0	0.7	0.5
0	0	0	0.5	0.6	0	0			0.1	0	0	0.9	1	0.4	0.7	0	0.5
0	0.5	0.6	0.4	0.3	0	0			0.2	0.8	0.5	0.4	1	0.7	0	0	0.3
0	0	0.2	0.2	0.6	0	0			0	0.5	0.5	0.4	0.7	0.6	0.3	0.1	0.3
0.3	0	0.4	0.5	0.6	0	0			0.9	0.6	0.4	0.5	0.4	0.6	0.2	0.2	0.7
0	0.2	0.4	0.2	0.9	0	0			1	1	0	0.3	0.4	0	0.3	0	0.6
0.6	0.4	0.3	0.8	0.1	0	0			0.2	1	0	1	0.3	0.2	0.5	0.5	1
0	0.3	0.3	0.2	0.4	0	0			0.7	0.2	0.2	0.8	0	0	0	0	0.6
0	0.1	0.4	0.2	0.3	0	0			0.5	0.6	0.4	0.5	0.5	0	0	0.4	0.5
0.2	0.1	0.3	0.2	0.8	0	0			0.6	1	0.6	0	0.7	0	0	0.5	0.6
0.4	0.6	0.9	0	0.6	0	0			0	1	0.5	0	0	0	0	0	0.6
0.2	0.1	0	0.5	0.7	0	0			1	0.8	0.6	0	0.1	0	0	0	0.2
0	0.2	0	0.6	0.4	0	0			0	0	0.8	0	0.7	0	1	0.5	0.6
0.3	0.1	0.4	0.6	0.7	0	0.2			1	0.2	0.1	0	0.8	0	0.5	0.5	0
0	0.3	0.5	0.3	1	0.3	0.9			0.4	0.6	0.1	0.2	1	0	1	0.7	0.1
0.2	0	0.7	0.1	0.2	0.1	0.9			0.6	0.1	0.9	0	0.5	0	1	0.4	0.2
0.5	0.2	0.6	0.5	0	0.7	0			0.2	0	0.3	0.1	0.3	0	1	0.3	0.3
0.1	0.1	0.5	0.3	0.4	0.7	0.2			0.1	0.7	0.3	0.2	0	0	0.2	0.7	0
0.4	0.2	0	0.5	0.8	1	0.6			1	0.6	1	0.8	0.1	0	0.5	0.2	0
0	0	0.4	0	0	0.3	0.2			0.5	0.3	0.9	0.5	0.7	0	0.4	0.7	0
0.3	0.3	0	0.3	0	0.1	0.5			0.5	0.5	1	1	0.1	0	0	0.8	0.1
0.1	0	0.2	0.7	0.3	0	0.3			0.1	1	0.7	0.5	0	0	0.4	0.3	0
0.7	0	0.7	0.2	0.2	0	0.5			0.3	0.6	0.3	0	0.7	0	0.6	0.7	0
0	0	0	0.7	0.3	0	0.2			0	0.3	0	0.5	0.1	0	0.6	0	0
0.3	0	0	0.8	0.5	0	0			0	0.3	0.1	0.3	0.6	0	0.6	0.4	0.5
0	0.5	0.2	0.2	0.6	0.2	0.2			0.2	0.9	0.4	0.9	0	0	0	0	0.2
0.3	0	0.3	0.3	0	0	0.2			0	0.6	0	0.5	1	0	0.6	0.1	0.1
0.2	0	0.5	0.7	0.3	0.3	0.2			0	0.6	0	0.6	1	0	0.7	0.5	0.4
0	0	0.2	0.8	0	0	0.3			0	0.6	0.1	0	0.1	0	0.1	0.1	0.5
0	0.2	0.6	0.6	0.5	0.3	0.2			0.5	1	0	0.5	0	0	0.7	0.2	0
0	0	0.8	0.2	0	0.4	0.5			0	0.8	0	0.5	0.8	0.5	0.1	0.6	0.3
0.6	0	0.3	0	0.8	0	0.7			0	0.7	0.3	0.3	1	0.7	0.8	0.5	0.1
0.5	0	0.3	0	0	0.3	0.2			0	0.8	0	0	0.9	0.5	0.1	0	0.3
0.6	0	0.6	0	0.4	0	0			0	0.8	0	0.7	0.9	0	0	0.7	0.5
0.5	0.5	0.2	0.2	0	0.2	0.2			0	0.8	0	0	0.6	0.5	0	0.3	0.8
0.3	0.7	0.4	0.4	0	0.1	0.5			0.3	0.6	0	0	1	0.4	0	0.5	1
0.4	0.1	0.1	0.2	0.1	0	0.3			0.1	0.2	0	0.2	0.6	0.1	0.1	0.5	0.4
0.1	0	0	0.2	0.2	0	0.4			0.5	0.9	0.5	0	0.7	0.1	0.4	0.3	0.3
0.5	0	0.4	0	0	0	0.8			0.3	1	0	0.1	0.6	0.8	0.1	0.7	0.7
0.7	0	0.1	0	0	0.3	0.4			0.4	0.8	0.9	0.6	1	0.4	0.3	0	0.2
0	0.6	0.4	0	0.3	0	0			0	0.9	0.4	0.3	0.3	0.2	0	0.7	0.3
0	0	0	0.2	0.7	0.2	0			0.2	0.3	0.2	0.2	0.5	0.4	0	0.2	0.6
0.4	0	0	0.1	0.4	0	0.1			0.1	1	1	0.2	0.5	0	0.5	0.2	0.8
0	0	0	0.4	0.4	0	0			0	1	0.3	0.5	0.7	0.5	0.4	0.2	1
0	0.5	0.2	0.4	0.1	0	0.4			0	0.9	0	0.5	0.3	0.3	0.2	0.3	1
0	0.4	0.1	0	0.7	0	0.5			0	1	0.2	0.2	0.9	0.7	0.3	0.5	1
0	0	0.5	0.7	0.2	0	0.5			0	1	0.1	0.5	0	0.6	0	0.7	0.5
0	0.1	0.6	0	0.9	0	0.5			0	0.7	0.1	0.7	0.8	0	0.4	0.8	0.8
0.2	0.1	0.5	0.1	0.2	0	0.2			0.1	1	0.1	0.4	0.7	0	0.3	0.9	0.3
0.1	0.2	0	0.2	0.7	0	0.2			0	0.8	0.1	0.5	0.6	0.3	0.3	0.7	0.1
0	0.3	0.4	0	0.7	0.2	0.4			0	1	0	1	0.9	0.5	0.5	0.3	0.3
0	0	0	0	0	0.3	0.4			0.4	0.7	0	1	0.3	0.7	0.2	0.4	0.8
0	0	0.7	0.2	0	0.5	0.1			0.4	0.6	0	0.2	0.6	0.6	0.5	0.4	0.4
0.3	0.1	0.2	0	0	0	0.5			0	0.7	0.1	0.1	0.9	0	0.5	0.5	0.3
0	0	0.5	0	0.5	0.9	0.4			0	0.8	0.3	0.2	0.1	0.7	0.4	0.7	0.4
0	0.1	0.5	0.2	0	0	0.4			0.3	1	0.3	0.7	0.6	0.7	0.8	0.4	0.6
0	0.1	0.1	0	0	0.2	0.5			0	0.6	0.6	0	0.8	0	0.3	0.5	0.6
0.1	0	0	0.3	0.4	0.6	0.5			0	1	0.4	0.2	0.7	0.7	0.3	0.8	0.5
0.2	0	0	0.3	0.1	0	0.3			0	0.9	0.2	0.2	0.2	0.4	0.2	0.1	0.3
0	0	0.5	0.4	0.1	0.6	0.9			0	0.5	0.5	0.2	0.5	0.8	0.1	0.3	0.8
0.2	0.4	0.4	0.1	0.4	0	0.9			0	1	0.5	0.6	0.3	0.9	0.6	0.7	0.6
0	0	0	0	0.5	0.2	0.5			0	0.3	0	0.3	0.4	0.1	0.2	0	0.3
0.2	0.1	0.5	0	0.5	0.7	0.2			0.2	1	0.1	0.4	0.2	0.4	0.4	0.2	0.9
0.1	0.3	0.5	0.3	0.9	0.8	0.6			0	0.4	0	0.5	0.1	0.1	0.2	0.4	0.9
0.4	0	0.3	0.4	0.7	0.3	0.9			0	1	0.2	0.6	0.5	0.2	0.6	0.7	0.3
0.2	0	0.5	0.4	0.3	0.3	0.8			0.7		0	0.3	0.3	0.8	0.2	0.2	0.5
0.3	0.5	0.4	0.2	0.2	0.4	0.7			0		0.6	0.5	0.4	0.5	1	0.1	0.2
0	0	0.7	0.2	0	0.4	0.9			0.1		0.5	0.8	0	0.2	0.6		0.2
0.3	0.3	0.5	0.2	0.3	0.5	0.4			0.1		0.1	0.7	0.3	0.7	0.6		0.4
0	0	0.4	0.4	0.7	0.5	0.4			0.1		0.8	0.9	1	0.5	0		0.5
0.2	0	0	0.3	0	0.2	0.4			0.1		0	0.3	0.1	0	0.3		0.4
0	0	0.1	0.2	0	0.5	0.1			0.2		0.8	0.3	0.9	0.3	0.4		0.6
0.3	0.4	0	0.1	0.3	0.4	0.3			0		0.9	0.4	0.2	0.2	0.5		0.7
0	0.4	0.5	0.3	0.2	0.4	0.1			0		0.5	0.4	0.3	0.4	0.4		0.7
0	0	0.2	0.4	0.3	0.6	0.4			0.2		1	0.4	1	0.1	0.3		0.4
0.2	0	0	0.5	0.3	0	0.1			0.4		1	0.3	1	0	0.5		0.5
0	0.3	0.4	0.3	0.6	0	0.4			0		0.5	0.2	1	0.1	0.6		0.7
0.2	0.3	0.2	0.4	0.4	0	0.6			0		0.7	1	0.5	0.6	0.4		0.3
0.3	0.6	0	0	0.7	0.2	0.6			0		0	0.4	0.1	0.5	0.7		0.5
0	0.1	0	0.3	0.8	0.6	0.5			0		0.1	0.6	0.2	0.6	0.2		0.7
0	0	0.3	0.3	0.7	0	0.6			0.1		0	0	1	0.3	0.7		0.3
0.4	0.3	0.6	0.5	0.2	0	1			0		0.6	0.3	1	0.1	0.1		0
0.2	0.2	0.5	0	0.9	0	0.7			0.4		1	0.4	1	0.8	0.6		0.9
0	0.2	0.2	0.5	0.7	0	0.9			0.2		0.2	0.4	0.7	0.5	0.1		0.5
0.2	0	0.6	0.4	0.5	0	0.4			0		1	0.5		0	0.3		0.8
0.3	0.1	0.3	0.2	0.1	0	0.6			0.3		0	0		0.2	0.2		0.2
0.1	0.2	0.6	0.5	0	0	0.4			0.7		0	0.5		0	0		0.7
0.2	0	0.3	0.2	0.6	0	0			0.3		0	0.4		0.3	0.7		0.3
0	0.3	0.4	0.4	0.1	0	0.6			0.2		0.1	0.5		0.3	0.1		0.4
0	0	0.1	0.5	0	0	0.4			0.3		0.2	0.6		0.7	0.2		0.3
0	0	0.3	0.6	0	0	0			0.5		0.2	1		0.5	0.4		0.7
0	0.5	0	0.2	0.7	0	0			0.4		0	0		0.2	0		1
0.1	0.4	0.2	0.3	0.5	0	0			0.1		0.3	0.5		0.2	0.3		0.4
0	0	0.5	0	0.6	0	0			0		0	0.5		0	0.1		0.7
0	0	0.9	0.2	0.7	0	0			0.3		0.2	0.9		0.1	0.1		0.3
0.2	0	0.2	0.3	0.6	0	0			0.5		0.6	0.4		0.4	0		0.7
0.2	0.1	0.7	0	0.8	0	0			0		0	0.9		0	0		0.9
0.5	0.4	0.3	0.1	0.6	0	0			0		0	0.7		0.5	0		0.3
0	0.6	0.7	0	0.5	0	0			0.5		0.5	0		0.4	0		0.3
0	0.4	0.2	0.6	0.7	0	0					0.4	0		0.7	0		0.8
0.2	0.1	0.3	0.5	0.7	0	0					0.3	0		0.5			0.7
0.4	0.4	0	0.1	0.5	0	0					0.5	0		0.1			0.3
0.1	0.3	0.2	0.3	0.7		0					0.5	0		0.7			0.5
Note: Each row is average of 10 s bin of activity, one animal per column
Activity is detected as binary value 0= no movement, 1= movement
If omitted, signal was lost
