# Supplementary material for: Hippocampal-hypothalamic circuit controls context-dependent innate defensive responses
Source: eLife. 2022 Apr 14;11:e74736. doi: 10.7554/eLife.74736 (PMC9042231; doi:10.7554/eLife.74736)
Supplement: Figure 5—source data 1. — HPC→AHN pathway activation is aversive and instructs learning of a conditioned place aversion. [file elife-74736-fig5-data1.xlsx]

## Sheet: Sheet1
	Figure Title	Figure 5. HPC→AHN pathway activation is aversive and instructs learning of a conditioned place aversion
	Tab Page
	Habituation	c, Chamber preference during habituation (unpaired t-test, two-tailed, t=0.8339, df=41, p=0.4089, NS). d, Distance travelled during habituation (unpaired t-test, two-tailed, t=0.2674, df=41, p=0.7905, NS).
	Real Time Place Aversion	f, Real time place aversion monitored across 20 minute test. GFP 6 Hz vs. ChR2 6 Hz (2-WAY RM ANOVA, time x treatment F(3,120)=3.539, *p=0.0168), GFP 20 Hz vs. ChR2 20 Hz (2-WAY RM ANOVA, time x treatment, F(3,30)=4.132, *p=0.0145). GFP 6 Hz vs. GFP 20 Hz (2-WAY RM ANOVA, time x frequency, F (3, 75) = 1.249, p=0.2980, NS). ChR2 6 Hz vs. ChR2 20 Hz (2-WAY RM ANOVA, time x frequency, F (3, 75) = 1.…
	Conditioned Aversion	h, Conditioned aversion memory tested 24-hours after real time place aversion tests. GFP 6 Hz vs. ChR2 6 Hz (unpaired t-test, two-tailed, t= 3.916, df=10, **p=0.0029). GFP 20 Hz vs. ChR2 20 Hz (unpaired t-test, two-tailed, t=1.996, df=10, p=0.0739, NS). ChR2 6 Hz vs. ChR2 20 Hz (unpaired t-test, two-tailed, t=0.4771, df=10, p=0.6436, NS). GFP 6 Hz vs. GFP 20 Hz (unpaired t-test, two-tailed, t= 0.…

## Sheet: Habituation
Fig 5C			Fig 5D
Pref Index			Distance travelled
GFP	ChR2		GFP	ChR2
0.187333	0.0386667		16.948	16.538
-0.088	0.135333		12.095	21.384
0.250667	0.207333		18.671	17.207
-0.238667	0.074		20.811	17.548
0.308	0.72		8.635	18.855
0.177333	-0.042		13.039	9.521
-0.356667	0.074		7.755	18.325
0.360667	-0.022		22.444	17.62
-0.146667	0.119333		12.725	15.426
-0.0313333	0.465333		17.693	18.7
0.022	0.320667		12.621	19.628
-0.145333	0.072		9.903	12.262
0.2	0.2		7.984	11.817
0.3	0.5		2.23	6.662
0.2	0.2		8.736	5.39
0.1	0.1		6.249	8.178
0.7	0.3		8.705	4.51
0.2	0.5		11.116	11.746
0.4	0.1		9.145	9.107
0.2	0.1		4.528	3.046
0.4	0.1		18.21	3.959
	0.3			4.997

## Sheet: RTPA
Fig 5F
Pref. Index	GFP 6 Hz																						6 Hz ChR2																						6 Hz GFP
0-5 min	0.135333	-0.084	0.384	0.151	0.068	0.003	0.255	0.02	-0.227	0.2	0.223	0.349	0.20133	0.022	-0.09963	-0.216	-0.04	-0.174	0.18	0.11133	0.41533		0.152667	-0.218667	-0.336	-0.259333	-0.734667	-0.358	0.301333	-0.133333	0.152667	0.00866667	0.117333	0.183333	0.0313333	-0.260667	-0.138	0.13	-0.0927	-0.168	-0.174	-0.1113	-0.4153		0.14	0.804667	0.173333	0.404	0.335333
5-10 min	-0.246667	0.491333	0.672	0.071	0.095	-0.01	0.242	-0.049	-0.605	0.041	0.116	0.543	0.07067	-0.22467	-0.25533	-0.07733	-0.20133	-0.448	-0.006	0.53867	0.62733		-0.363333	-0.48	-0.164667	-0.666667	-1	-0.006	-0.215333	-1	-0.235333	-0.326	-0.162667	0.0293333	-0.0193333	-0.306667	-0.478	0.2447	-0.094	-0.108	-0.448	-0.5387	-0.6273		0.43	-0.482667	-0.223333	0.846	0.298
10-15 min	-0.206667	0.226667	0.778	0.057	0.673	0.103	0.388	-0.097	0.24	0.209	-0.036	0.752	0.21733	0.126	-0.21	-0.09533	-0.072	-0.128	0.034	0.38533	0.53133		-0.03	-0.629333	0.306667	-0.475333	-0.704	-0.145333	-0.698667	-1	-0.464667	-0.730667	-0.102	-0.118	-0.02	-0.382	-0.0926667	-0.254	-0.0533	0.1007	-0.128	-0.3853	-0.5313		0.655333	0.641333	-0.300667	1	0.869333
15-20 min	-0.254	-0.541333	0.315	-0.185	-0.073	0.348	0.516	0.059	-0.262	0.051	-0.275	0.383	0.01133	0.05133	-0.11067	-0.19133	0.01	-0.17133	-0.23133	0.21933	0.49667		-0.338667	-0.807333	-0.00133333	-0.820667	-0.930667	0.0873333	-1	-1	0.0593333	-0.770667	0.448	-0.318667	-0.107333	-0.6	-0.364667	0.126	-0.028	0.016	-0.1713	-0.2193	-0.4967		0.204667	0.302	-0.301333	1	1
Fig 5H
Distance Travelled (m)
6 Hz GFP	6 Hz ChR2	20 Hz GFP	20 Hz ChR2
29.843	39.249	9.49	52.373
28.755	35.678	9.013	50.169
50.511	27.044	25.515	10.934
49.804	14.225	15.594	13.903
23.857	7.478	49.837	53.779
31.072	24.713	6.948	29.739
76.849	48.784
55.707	66.868
30.836	43.437
38.628	30.308
65.153	43.205
83.326	56.472
65.243	56.31
65.134	29.239
67.688	71.554
40.254	54.333
58.24	58.793
66.797	39.46
56.311	51.522
77.312	61.346
71.33	41.245
	73.434
[truncated: 13 more columns]

## Sheet: CPA
	Fig 5H					Fig 5I
	Conditioned aversion					Distance Travelled (m)
	6 Hz GFP	6 Hz ChR2	20 Hz GFP	20 Hz ChR2		6 Hz GFP	6 Hz ChR2	20 Hz GFP	20 Hz ChR2
	0.169333	-0.592667	0.648667	0.399333		8.329	11.192	6.918	8.212
	0.0273333	-0.682	-0.170667	-0.227333		7.574	7.381	7.236	8.616
	-0.130667	-0.388667	0.259333	-0.837333		8.142	2.634	8.736	3.02
	0.0906667	-0.889333	-0.0993333	-1.07067		12.082	3.598	8.687	3.797
	0.0393333	0.014	0.190667	0.0806667		7.099	4.562	10.148	4.488
	0.179333	-0.313333	0.122	-0.452		3.023	5.492	3.023	6.923
