# Supplementary material for: Hippocampal-hypothalamic circuit controls context-dependent innate defensive responses
Source: eLife. 2022 Apr 14;11:e74736. doi: 10.7554/eLife.74736 (PMC9042231; doi:10.7554/eLife.74736)
Supplement: Figure 6—figure supplement 2—source data 1. — L-Felinine increases freezing in a dose-dependent manner. [file elife-74736-fig6-figsupp2-data1.xlsx]

## Sheet: ED Fig 6A
ED Fig 6A
	Odorant	Sniffing	Freezing
	L-Felinine 10%	3.7	55.8
	L-Felinine 10%	2.5	25.3
	L-Felinine 10%	10	93.3
	L-Felinine 10%	8.6	58.9
	L-Felinine 10%	17.6	136.4
	L-Felinine 10%	7.4	69
	L-Felinine 1%	13	23.5
	L-Felinine 1%	21.6	13.8
	L-Felinine 1%	34	20.8
	L-Felinine 1%	3.2	40
	L-Felinine 0.3%	19.3	16.4
	L-Felinine 0.3%	32.2	54.4
	L-Felinine 0.3%	28.6	15.1
	L-Felinine 0.05%	12.8	26.4
	L-Felinine 0.05%	23.7	4.4
	L-Felinine 0.05%	65	13.5

## Sheet: ED Fig 6B
ED Fig 6B
	Odorant	Sniffing	Freezing
	Water	24.4	0
	Water	16.4	0
	Water	4.6	0
	Water	21.4	0
	Water	3.7	0
	Water	7.5	0
	Water	11.3	0
	Water	18.8	0
	Water	11.5	0
	Water	12.5	0
	Bobcat	53.3	0.4
	Bobcat	79.8	0.6
	Coyote	88.5	3.5
	Coyote	65.6	15.5
	Coyote	37.2	13.4
	Fox	51.6	22.5
	Fox	136.7	15.1
	L-Felinine 0.05%	65	13.5
	L-Felinine 0.05%	13	23.5
	L-Felinine 0.05%	12.8	26.4
