# Supplementary material for: Hippocampal-hypothalamic circuit controls context-dependent innate defensive responses
Source: eLife. 2022 Apr 14;11:e74736. doi: 10.7554/eLife.74736 (PMC9042231; doi:10.7554/eLife.74736)
Supplement: Figure 6—figure supplement 3—source data 1. — Behavioral responses to L-Felinine during conditioning sessions. [file elife-74736-fig6-figsupp3-data1.xlsx]

## Sheet: Sheet 1
	Figure title	Extended Data Fig 7. Behavioural responses to L-Felinine during conditioning sessions.
	Tab page
	Conditioning session	a, Freezing induced by water and L-Felinine during two days of conditioning (d1 and d2) in GFP and ArchT mice (GFP N=8, ArchT N=12). Black: Day 1 water, Red: Day 1 L-Felinine, Grey: Day 2 water, Pink: Day 2 L-Felinine. (2-WAY ANOVA, D1 odorant x genotype, F(1,36)=0.2311, p=0.6332, D2 odorant x genotype, F(1,36)=0.2283, p=0.6353, ****p<0.0001).
	Conditioning session	b, Distance travelled during water and L-Felinine exposure during two days of conditioning (2-WAY ANOVA, D1 odorant x genotype, F(1,42)=0.4615,0.5007, 2-WAY ANOVA, D2 odorant x genotype, F(1,36)=0.01967, p=0.8891, NS).

## Sheet: Coditioning session
ED Fig 7A
Freezing (s)
	d1: CTX- water													d2: CTX-water													d1: CTX- L-Felinine													d2: CTX- L-Felinine
GFP	7.5	4.4	26	18.2	44.2	28.6	41.5	23						7.5	4.4	26	18.2	44.2	28.6	80.6	36.9						287	424	561.6	134	356	214	214	345						146	256	263	363	213	168	94	262
ArchT	95.3	72.3	65.4	13.7	11.8	64	23	30	80	22	30	21.7		1.7	1.1	2.3	53	1.2	1.5	1.4	12.4	4.1	1.3	22	4		357.9	158.1	387.9	227.3	261.6	340.1	566.2	143.2	190.2	502.2	321.2	527		287	135	144	130	242	235	193.7	380.1	313	150
ED Fig 7B
Distance
	d1: CTX- water													d2: CTX-water													d1: CTX- L-Felinine													d2: CTX- L-Felinine
GFP	23.716	14.417	9.499	13.767	17.352	18.942	14.115	25.706						10.64	18.872	6.366	20.576	17.483	6.822	15.116	17.762						15.288	17.132	7.536	17.337	21.995	14.971	19.318	6.625						13.174	17.015	13.996	23.11	18.322	12.651	17.268	8.793
ArchT	13.369	6.914	36.976	12.283	19.015	20.307	17.818	22.454	14.948	15.72	12.804	12.731		25.245	12.691	14.701	15.654	15.798	14.312	13.976	13.653	13.469	13.804	6.38	8.023		18.103	28	16.741	23.606	18.801	14	21.405	13.985	16.241	14.381	12.065	10		14.226	15.671	20.344	21	18.072	21.199	13.815	10.088	12	12
[truncated: 2 more columns]
