# Supplementary material for: Hippocampal-hypothalamic circuit controls context-dependent innate defensive responses
Source: eLife. 2022 Apr 14;11:e74736. doi: 10.7554/eLife.74736 (PMC9042231; doi:10.7554/eLife.74736)
Supplement: Figure 6—figure supplement 4—source data 1. — HPC→AHN pathway inhibition impairs the retrieval of place aversion memory. [file elife-74736-fig6-figsupp4-data1.xlsx]

## Sheet: Sheet2
	A
		Pre-Con	0.4761	0.228	0.0837	0.2647	0.7479	0.2394	0.4059	0.0107	0.877
		Post-Con	-0.17	-0.13	-0.21	0.1	0.4	0.2	-0.63	0.07	0.27
	B
			ArchT
		Pre-Con	0.2814	0.547	0.1766	0.0027	0.433	0.1913	0.0396	0.5399	0.6652	0.6054	0.5919	0.5599
		Post-Con	-0.05	0.2	-0.01	0.18	0.57	0.13	0.36	0.36	0.58	0.42	0.32	0.32
