# Supplementary material for: Hippocampal-hypothalamic circuit controls context-dependent innate defensive responses
Source: eLife. 2022 Apr 14;11:e74736. doi: 10.7554/eLife.74736 (PMC9042231; doi:10.7554/eLife.74736)
Supplement: Figure 6—figure supplement 5—source data 1. — Development of predator associated context avoidance and impaired retrieval of place aversion memory upon HPC-AHN pathway inhibition. [file elife-74736-fig6-figsupp5-data1.xlsx]

## Sheet: Sheet2
ED Fig 9B		ED Fig 9C
GFP	ArchT	Day	GFP								ArchT								ED Fig 9D			ED Fig 9E				ED Fig 9F
0.088	0.205333	Day 1	-0.17533	0.009333	-0.13667	0.01	-0.264	-0.16533	0.010667	0.466667	-0.138	0.603333	0.152667	-0.64667	0.458667	0.083333	-0.074		Conditioned aversion			GFP				ArchT
0.018	0.2	Day 2	-0.14467	-0.18467	-0.12533	-0.09	-0.05867	-0.206	-0.09533	0.266667	-0.16667	0.023333	0.464667	0.466	-0.17267	0.634667	-0.24333		GFP	ArchT		Pre-Con	Day 5	Post-Con		Pre-Con	Day 5	Post-Con
0.016667	0.145333	Day 3	-0.24133	-0.12	-0.14667	-0.09667	-0.32267	-0.13133	-0.01133	0.013333	-0.30667	0.642	-0.29067	-0.71067	-0.796	0.176	-0.02867		-0.528	-0.21133		0.088	-0.416	-0.44		0.205333	-0.47	-0.006
0.18	0.189333	Day 4	-0.09333	-0.258	-0.46067	-0.02467	-0.15733	-0.014	-0.07467	-0.32	-0.114	0.029333	-0.236	-0.654	-0.35867	-0.466	-0.60067		-0.732	-0.094		0.018	-0.522	-0.714		0.2	-0.48	0.106
0.143333	0.186	Day 5	-0.416	-0.522	-0.462	-0.552	-0.72	-0.388	-0.108	-0.468	-0.47	-0.48	-0.17	-0.654	-0.148	-0.36	-0.44		-0.144667	-0.14333		0.016667	-0.462	-0.128		0.145333	-0.17	0.002
0.008	0.018																		-0.66	0.030667		0.18	-0.552	-0.48		0.189333	-0.654	0.22
0.006	0.056																		-0.323333	-0.37		0.143333	-0.72	-0.18		0.186	-0.148	-0.184
0.107333																			-0.158	-0.236		0.008	-0.388	-0.15		0.018	-0.36	-0.218
																			-0.508	-0.298		0.006	-0.108	-0.502		0.056	-0.44	-0.242
																			-0.487333			0.107333	-0.468	-0.38
