# Supplementary material for: Hippocampal-hypothalamic circuit controls context-dependent innate defensive responses
Source: eLife. 2022 Apr 14;11:e74736. doi: 10.7554/eLife.74736 (PMC9042231; doi:10.7554/eLife.74736)
Supplement: Figure 6—source data 1. — HPC input to the AHN is necessary for remembering the context-associated with predatory threat. [file elife-74736-fig6-data1.xlsx]

## Sheet: Sheet1
	Figure title	Figure 6. HPC input to the AHN is necessary for remembering the context-associated with predatory threat
	Figure ID	d, Conditioned aversion memory tested 24-hours after conditioning. GFP vs. ArchT (unpaired t-test, t=3.223, df=20. **p=0.0043). e, Freezing time during the conditioned place aversion test. GFP vs. ArchT (unpaired t-test, t=3.056, df= 20, **p=0.0062). f
		e, Freezing time during the conditioned place aversion test. GFP vs. ArchT (unpaired t-test, t=3.056, df= 20, **p=0.0062).
		f, Number of escape runs from the L-Felinine-paired chamber to the water-paired chamber. GFP vs. ArchT (unpaired t-test, t=4.479, df=20, ***p=0.0002).
		g, Time spent grooming during the conditioned place aversion test. GFP vs. ArchT (unpaired t-test, t=2.816, df=20, *p=0.0107).
		h, Distance travelled during habituation (pre) and conditioned place aversion test (post) (2-WAY ANOVA, training x treatment, F(1, 20)=0.9938, p=0.3307, NS).
		j, Density of c-Fos signals in AHN, VMHdm/c, and PMD in GFP control (black) and ArchT mice (green) (N=4 mice for each group). GFP-AHN vs. ArchT-AHN (unpaired t-test, two-tailed, t=7.005, df=6, ***p=0.0004). GFP-VMHdm/c vs. ArchT VMHdm/c (unpaired t-test, two-tailed, t=0.5414, df=6, p= 0.6078, NS). GFP-PMD vs. ArchT-PMD (unpaired t-test, two-tailed t=5.810, df=6, **p=0.0011).

## Sheet: Sheet 2
Fig 6D			Fig 6E			Fig 6F			Fig 6G
Aversion Index			Freezing %			Escape runs			Grooming
GFP	ArchT		GFP	ArchT		GFP	ArchT		GFP	ArchT
-0.6461	-0.2314		21.5	14.1		3	0		35	14
-0.358	-0.247		13.2	3.5		3	0		59	49
-0.2937	-0.1866		21.9	18.1		3	1		107	29
-0.1647	0.1773		35.9333	14.4		5	2		60	11
-0.3479	0.137		18.8333	25.1		6	2		88	35
-0.1394	-0.0613		31	12.3333		3	0		52	29
-1.0359	0.3204		18.3333	2.86667		7	2		33	35
-0.0593	-0.1799		24.7333	18.1333		2	0		46	55
-0.607	-0.0852		22.0333	10.9667		3	2		44	19
-0.667	-0.1854		17	11.7667		5	1		35	57
	-0.2719			23.3333			3			12
	-0.2399			4.73333			3			34
Fig 6H	Distance travelled
	GFP												ArchT
pre	6.995	8.748	6.175	7.716	13.535	6.189	5.704	4.752	9.324	0.853			13.893	5.069	8.212	9.458	5.476	8.071	7.379	3.219	4.984	6.286	8.227	4.258
post	10.606	7.828	11.431	7.935	9.451	7.308	5.53	5.617	12.653	4.792			12.628	10.031	9.292	9.633	8.692	9.409	8.237	9.021	7.031	7.978	11.774	9.151
Fig 6J	cFOS quantification
		GFP					ArchT
	AHN	300	380	350	270		30	130	20	100
	dm/cVMH	20	70	10	50		40	13	0	80
	PMD	180	130	220	210		50	73	48	10
