# Supplementary material for: Hippocampal-hypothalamic circuit controls context-dependent innate defensive responses
Source: eLife. 2022 Apr 14;11:e74736. doi: 10.7554/eLife.74736 (PMC9042231; doi:10.7554/eLife.74736)
Supplement: Figure 7—source data 1. — HPC→AHN pathway activation induces goal-directed escape. [file elife-74736-fig7-data1.xlsx]

## Sheet: Fig 7D
	Habituation
	Shelter time
	GFP	ChR2
	200.9	227.7
	132.6	168.4
	157.9	157.9
	113.2	152.3
	164	205.9
	143	146.9
	200
	173.9

## Sheet: Fig 7E
Habituation phase
	GFP			ChR2
	Distance to shelter	Speed		Distance to shelter	Speed
	0.05			0.19
	0.05			0.19
	0.04			0.19
	0.04			0.19
	0.04			0.19
	0.04			0.19
	0.04			0.19
	0.04			0.19
	0.04			0.19
	0.04			0.19
	0.04			0.19
	0.04			0.19
	0.04			0.19
	0.04			0.19
	0.03			0.19
	0.03			0.19	0.017
	0.03			0.19	0.01
	0.03			0.19	0.011
	0.03			0.19	0.015
	0.03	0.073		0.19	0.019
	0.03	0.067		0.19	0.015
	0.03	0.052		0.19	0.018
	0.03	0.038		0.19	0.021
	0.03	0.034		0.19	0.021
	0.03	0.031		0.19	0.021
	0.03	0.026		0.19	0.024
	0.03	0.023		0.19	0.024
	0.03	0.02		0.19	0.024
	0.04	0.023		0.19	0.024
	0.04	0.023		0.19	0.024
	0.04	0.024		0.19	0.024
	0.04	0.027		0.19	0.024
	0.04	0.03		0.19	0.023
	0.04	0.029		0.19	0.022
	0.04	0.032		0.19	0.022
	0.04	0.031		0.19	0.022
	0.04	0.034		0.19	0.023
	0.04	0.034		0.19	0.023
	0.04	0.034		0.19	0.019
	0.03	0.038		0.19	0.023
	0.03	0.042		0.19	0.019
	0.03	0.045		0.19	0.019
	0.03	0.049		0.19	0.023
	0.03	0.053		0.19	0.026
	0.02	0.057		0.19	0.026
	0.02	0.061		0.19	0.026
	0.02	0.062		0.19	0.026
	0.02	0.063		0.19	0.026
	0.02	0.074		0.19	0.026
	0.02	0.083		0.19	0.026
	0.02	0.088		0.19	0.026
	0.02	0.094		0.19	0.023
	0.02	0.1		0.19	0.019
	0.02	0.097		0.19	0.019
	0.02	0.097		0.19	0.019
	0.02	0.095		0.19	0.019
	0.02	0.095		0.19	0.019
	0.02	0.095		0.19	0.019
	0.02	0.087		0.19	0.016
	0.02	0.087		0.19	0.019
	0.02	0.082		0.19	0.023
	0.02	0.081		0.19	0.023
	0.02	0.083		0.19	0.023
	0.02	0.073		0.19	0.019
	0.02	0.071		0.19	0.016
	0.02	0.071		0.19	0.016
	0.02	0.07		0.19	0.016
	0.03	0.08		0.19	0.016
	0.03	0.096		0.19	0.016
	0.03	0.106		0.19	0.013
	0.02	0.117		0.19	0.013
	0.02	0.124		0.19	0.013
	0.02	0.134		0.19	0.01
	0.02	0.143		0.19	0.01
	0.02	0.147		0.19	0.006
	0.02	0.147		0.19	0.003
	0.02	0.142		0.19	0.003
	0.02	0.143		0.19	0
	0.02	0.143		0.19	0
	0.02	0.14		0.19	0
	0.02	0.14		0.19	0
	0.01	0.141		0.19	0
	0.01	0.132		0.19	0
	0.02	0.123		0.19	0
	0.02	0.116		0.19	0
	0.02	0.106		0.19	0.003
	0.02	0.098		0.19	0.003
	0.02	0.089		0.19	0.007
	0.03	0.086		0.19	0.01
	0.04	0.083		0.19	0.01
	0.05	0.087		0.19	0.013
	0.06	0.092		0.19	0.016
	0.07	0.102		0.19	0.016
	0.08	0.123		0.19	0.019
	0.09	0.139		0.19	0.019
	0.11	0.152		0.19	0.019
	0.12	0.162		0.19	0.019
	0.12	0.176		0.19	0.019
	0.13	0.191		0.19	0.019
	0.14	0.214		0.19	0.019
	0.15	0.235		0.19	0.016
	0.16	0.256		0.19	0.016
	0.16	0.276		0.19	0.013
	0.17	0.29		0.19	0.01
	0.18	0.303		0.19	0.01
	0.18	0.31		0.19	0.011
	0.19	0.313		0.19	0.012
	0.19	0.315		0.19	0.017
	0.19	0.301		0.19	0.013
	0.2	0.288		0.19	0.017
	0.2	0.274		0.19	0.02
	0.2	0.261		0.19	0.024
	0.21	0.254		0.19	0.024
	0.21	0.241		0.19	0.028
	0.21	0.223		0.19	0.031
	0.21	0.201		0.19	0.031
	0.21	0.185		0.19	0.035
	0.21	0.165		0.19	0.035
	0.21	0.148		0.19	0.039
	0.21	0.131		0.19	0.042
	0.21	0.117		0.19	0.038
	0.21	0.107		0.19	0.033
	0.21	0.088		0.19	0.032
	0.21	0.078		0.19	0.032
	0.21	0.071		0.2	0.032
	0.21	0.065		0.2	0.032
	0.21	0.062		0.2	0.034
	0.21	0.048		0.2	0.038
	0.21	0.038		0.2	0.038
	0.21	0.031		0.2	0.034
	0.21	0.028		0.2	0.038
	0.21	0.021		0.2	0.036
	0.21	0.016		0.2	0.04
	0.21	0.013		0.2	0.038
	0.21	0.01		0.2	0.038
	0.21	0.01		0.2	0.038
	0.21	0.013		0.2	0.042
	0.21	0.013		0.2	0.038
	0.21	0.016		0.2	0.038
	0.21	0.013		0.2	0.038
	0.21	0.016		0.2	0.035
	0.21	0.016		0.2	0.035
	0.21	0.019		0.2	0.036
	0.21	0.023		0.2	0.033
	0.21	0.019		0.2	0.037
	0.21	0.023		0.2	0.038
	0.22	0.027		0.2	0.04
	0.22	0.03		0.2	0.04
	0.22	0.035		0.2	0.042
	0.23	0.039		0.2	0.042
	0.23	0.044		0.2	0.047
	0.24	0.048		0.2	0.047
	0.24	0.055		0.2	0.05
	0.24	0.062		0.2	0.053
	0.24	0.073		0.2	0.059
	0.24	0.074		0.2	0.062
	0.24	0.08		0.21	0.063
	0.24	0.08		0.21	0.062
	0.25	0.08		0.21	0.065
	0.25	0.084		0.21	0.06
	0.25	0.086		0.21	0.06
	0.25	0.086		0.21	0.06
	0.25	0.087		0.21	0.064
	0.25	0.086		0.21	0.064
	0.25	0.082		0.21	0.061
	0.25	0.08		0.22	0.056
	0.25	0.073		0.22	0.057
	0.25	0.07		0.22	0.057
	0.25	0.059		0.22	0.054
	0.25	0.048		0.22	0.048
	0.25	0.043		0.22	0.048
	0.25	0.034		0.22	0.041
	0.25	0.036		0.22	0.038
	0.25	0.037		0.22	0.035
	0.25	0.033		0.22	0.037
	0.25	0.031		0.22	0.032
	0.25	0.03		0.22	0.031
	0.25	0.03		0.22	0.028
	0.25	0.03		0.22	0.026
	0.25	0.036		0.22	0.029
	0.25	0.043		0.22	0.029
	0.25	0.053		0.21	0.029
	0.25	0.053		0.21	0.029
	0.25	0.057		0.21	0.029
	0.25	0.061		0.21	0.029
	0.25	0.068		0.21	0.026
	0.25	0.075		0.22	0.029
	0.25	0.077		0.22	0.029
	0.25	0.074		0.22	0.036
	0.25	0.077		0.21	0.041
	0.25	0.077		0.21	0.045
	0.25	0.079		0.21	0.041
	0.25	0.082		0.21	0.038
	0.25	0.085		0.21	0.038
	0.25	0.085		0.21	0.037
	0.25	0.088		0.21	0.04
	0.25	0.084		0.21	0.036
	0.25	0.091		0.21	0.036
	0.25	0.101		0.21	0.039
	0.25	0.113		0.21	0.039
	0.26	0.12		0.21	0.044
	0.26	0.123		0.21	0.04
	0.26	0.127		0.21	0.04
	0.27	0.135		0.21	0.033
	0.27	0.149		0.21	0.029
	0.28	0.162		0.22	0.029
	0.27	0.174		0.22	0.032
	0.28	0.182		0.22	0.039
	0.28	0.191		0.22	0.039
	0.29	0.201		0.22	0.044
	0.29	0.204		0.22	0.044
	0.29	0.208		0.22	0.048
	0.3	0.208		0.22	0.045
	0.3	0.209		0.22	0.042
	0.3	0.208		0.22	0.042
	0.3	0.207		0.23	0.041
	0.31	0.207		0.23	0.044
	0.3	0.21		0.23	0.047
	0.3	0.212		0.23	0.05
	0.3	0.2		0.23	0.047
	0.3	0.187		0.23	0.047
	0.3	0.174		0.23	0.047
	0.3	0.161		0.23	0.041
	0.31	0.152		0.23	0.041
	0.3	0.141		0.23	0.034
	0.3	0.128		0.23	0.03
	0.31	0.12		0.23	0.026
	0.3	0.114		0.23	0.029
	0.31	0.103		0.23	0.029
	0.3	0.089		0.23	0.029
	0.31	0.076		0.23	0.026
	0.31	0.069		0.23	0.023
	0.31	0.057		0.23	0.019
	0.31	0.044		0.23	0.019
	0.31	0.039		0.23	0.019
	0.31	0.039		0.23	0.018
	0.31	0.042		0.23	0.015
	0.31	0.044		0.23	0.015
	0.32	0.04		0.23	0.012
	0.32	0.04		0.23	0.012
	0.32	0.044		0.23	0.012
	0.32	0.044		0.23	0.015
	0.32	0.044		0.23	0.012
	0.32	0.041		0.23	0.015
	0.32	0.045		0.23	0.012
	0.32	0.051		0.22	0.012
	0.32	0.055		0.22	0.012
	0.33	0.062		0.22	0.017
	0.33	0.072		0.22	0.018
	0.33	0.075		0.22	0.021
	0.32	0.078		0.22	0.022
	0.33	0.075		0.22	0.022
	0.33	0.07		0.22	0.022
	0.33	0.07		0.22	0.022
	0.33	0.069		0.22	0.022
	0.33	0.062		0.22	0.022
	0.33	0.062		0.22	0.023
	0.33	0.059		0.22	0.023
	0.33	0.059		0.22	0.02
	0.33	0.055		0.22	0.02
	0.33	0.051		0.22	0.02
	0.33	0.048		0.22	0.02
	0.33	0.044		0.22	0.019
	0.34	0.038		0.22	0.014
	0.34	0.038		0.22	0.011
	0.34	0.035		0.22	0.01
	0.34	0.036		0.22	0.013
	0.34	0.042		0.22	0.013
	0.34	0.044		0.22	0.013
	0.33	0.044		0.22	0.013
	0.33	0.046		0.22	0.016
	0.33	0.042		0.22	0.015
	0.33	0.042		0.22	0.018
	0.33	0.042		0.22	0.022
	0.33	0.04		0.22	0.022
	0.33	0.04		0.22	0.022
	0.33	0.04		0.22	0.022
	0.33	0.037		0.22	0.022
	0.33	0.034		0.22	0.028
	0.33	0.034		0.22	0.035
	0.33	0.031		0.22	0.046
	0.33	0.026		0.22	0.053
	0.33	0.02		0.21	0.056
	0.33	0.015		0.21	0.056
	0.33	0.015		0.21	0.056
	0.33	0.016		0.22	0.057
	0.33	0.016		0.22	0.054
	0.33	0.016		0.22	0.05
	0.33	0.02		0.22	0.047
	0.33	0.02		0.22	0.047
	0.33	0.019		0.22	0.047
	0.33	0.019		0.22	0.047
	0.33	0.019		0.22	0.047
	0.33	0.022		0.22	0.044
	0.33	0.019		0.22	0.038
	0.33	0.019		0.22	0.024
	0.33	0.019		0.22	0.016
	0.33	0.019		0.22	0.013
	0.33	0.019		0.22	0.016
	0.34	0.015		0.22	0.02
	0.33	0.012		0.22	0.018
	0.33	0.015		0.22	0.018
	0.33	0.018		0.22	0.018
	0.33	0.02		0.22	0.018
	0.33	0.02		0.22	0.018
	0.33	0.021		0.22	0.021
	0.33	0.021		0.22	0.024
	0.33	0.021		0.22	0.024
	0.33	0.017		0.22	0.021
	0.33	0.022		0.22	0.021
	0.33	0.024		0.22	0.021
	0.33	0.036		0.22	0.019
	0.33	0.039		0.22	0.023
	0.33	0.045		0.22	0.019
	0.33	0.052		0.22	0.019
	0.32	0.055		0.22	0.016
	0.32	0.055		0.22	0.016
	0.32	0.064		0.22	0.016
	0.32	0.062		0.22	0.016
	0.32	0.07		0.22	0.016
	0.32	0.071		0.22	0.013
	0.32	0.073		0.22	0.01
	0.32	0.082		0.22	0.007
	0.32	0.092		0.22	0.007
	0.32	0.098		0.22	0.007
	0.32	0.107		0.22	0.007
	0.32	0.103		0.22	0.007
	0.32	0.104		0.22	0.006
	0.32	0.101		0.22	0.01
	0.32	0.099		0.22	0.01
	0.31	0.103		0.22	0.013
	0.31	0.102		0.22	0.016
	0.31	0.1		0.22	0.019
	0.3	0.107		0.22	0.019
	0.3	0.113		0.22	0.019
	0.3	0.115		0.22	0.023
	0.3	0.12		0.22	0.023
	0.3	0.127		0.22	0.025
	0.3	0.127		0.22	0.025
	0.3	0.124		0.22	0.028
	0.3	0.119		0.22	0.031
	0.3	0.114		0.22	0.034
	0.3	0.116		0.22	0.034
	0.3	0.113		0.22	0.031
	0.29	0.108		0.22	0.028
	0.3	0.104		0.22	0.028
	0.3	0.107		0.22	0.028
	0.29	0.097		0.22	0.025
	0.29	0.093		0.22	0.025
	0.29	0.086		0.22	0.028
	0.29	0.091		0.22	0.028
	0.28	0.091		0.22	0.031
	0.28	0.081		0.22	0.029
	0.27	0.074		0.22	0.032
	0.27	0.074		0.22	0.032
	0.27	0.074		0.22	0.032
	0.27	0.082		0.22	0.032
	0.27	0.082		0.22	0.031
	0.27	0.092		0.22	0.036
	0.27	0.099		0.22	0.036
	0.26	0.109		0.22	0.033
	0.26	0.121		0.22	0.029
	0.25	0.144		0.22	0.029
	0.25	0.158		0.22	0.029
	0.25	0.169		0.22	0.026
	0.24	0.175		0.22	0.023
	0.24	0.189		0.22	0.02
	0.24	0.194		0.22	0.02
	0.24	0.207		0.22	0.02
	0.24	0.22		0.22	0.021
	0.24	0.233		0.22	0.024
	0.24	0.24		0.22	0.028
	0.24	0.243		0.22	0.029
	0.24	0.246		0.23	0.029
	0.24	0.248		0.23	0.036
	0.24	0.245		0.23	0.039
	0.24	0.238		0.23	0.042
	0.23	0.221		0.23	0.042
	0.23	0.202		0.23	0.042
	0.23	0.186		0.23	0.045
	0.23	0.173		0.23	0.045
	0.22	0.15		0.23	0.045
	0.22	0.137		0.23	0.045
	0.22	0.121		0.23	0.045
	0.21	0.104		0.23	0.041
	0.21	0.084		0.23	0.039
	0.2	0.07		0.23	0.035
	0.2	0.064		0.23	0.032
	0.19	0.061		0.23	0.029
	0.19	0.061		0.23	0.026
	0.18	0.059		0.24	0.027
	0.18	0.059		0.24	0.029
	0.18	0.067		0.24	0.033
	0.17	0.082		0.24	0.033
	0.17	0.093		0.24	0.035
	0.16	0.096		0.24	0.035
	0.15	0.103		0.24	0.039
	0.15	0.109		0.24	0.046
	0.14	0.12		0.25	0.045
	0.13	0.133		0.25	0.051
	0.13	0.15		0.24	0.051
	0.12	0.164		0.24	0.052
	0.12	0.174		0.24	0.057
	0.12	0.18		0.24	0.055
	0.11	0.183		0.24	0.052
	0.11	0.186		0.24	0.047
	0.11	0.186		0.24	0.046
	0.1	0.178		0.24	0.044
	0.1	0.167		0.24	0.044
	0.1	0.159		0.24	0.044
	0.1	0.163		0.24	0.048
	0.09	0.163		0.24	0.046
	0.09	0.167		0.24	0.047
	0.09	0.164		0.24	0.048
	0.09	0.155		0.24	0.045
	0.08	0.142		0.24	0.044
	0.08	0.129		0.24	0.042
	0.08	0.12		0.24	0.041
	0.07	0.111		0.24	0.044
	0.07	0.11		0.24	0.044
	0.06	0.103		0.24	0.047
	0.06	0.103		0.24	0.05
	0.06	0.107		0.24	0.047
	0.05	0.111		0.24	0.054
	0.05	0.114		0.24	0.058
	0.04	0.115		0.24	0.06
	0.03	0.114		0.24	0.061
	0.04	0.119		0.24	0.06
	0.03	0.123		0.24	0.059
	0.03	0.125		0.24	0.061
	0.03	0.129		0.24	0.065
	0.03	0.131		0.23	0.068
	0.03	0.133		0.23	0.072
	0.03	0.132		0.23	0.075
	0.03	0.124		0.23	0.08
	0.03	0.128		0.23	0.083
	0.03	0.118		0.23	0.083
	0.03	0.111		0.23	0.093
	0.04	0.104		0.23	0.1
	0.03	0.101		0.23	0.099
	0.03	0.097		0.23	0.104
	0.03	0.095		0.23	0.107
	0.03	0.08		0.23	0.111
	0.03	0.076		0.23	0.121
	0.03	0.071		0.24	0.127
	0.02	0.079		0.24	0.133
	0.02	0.077		0.24	0.137
	0.02	0.085		0.25	0.141
	0.02	0.095		0.25	0.141
	0.01	0.111		0.25	0.143
	0.01	0.113		0.25	0.141
	0.01	0.124		0.25	0.145
	0.01	0.131		0.25	0.142
	0.01	0.149		0.25	0.136
	0.01	0.158		0.25	0.132
	0.01	0.172		0.25	0.129
	0.02	0.18		0.25	0.126
	0.02	0.207		0.25	0.12
	0.03	0.217		0.25	0.115
	0.03	0.225		0.25	0.107
	0.04	0.226		0.25	0.1
	0.04	0.24		0.25	0.093
	0.05	0.237		0.26	0.088
	0.05	0.233		0.26	0.089
	0.05	0.229		0.26	0.098
	0.06	0.236		0.26	0.105
	0.06	0.239		0.26	0.108
	0.07	0.238		0.26	0.111
	0.07	0.23		0.26	0.114
	0.07	0.23		0.26	0.118
	0.07	0.224		0.26	0.118
	0.07	0.225		0.26	0.119
	0.07	0.209		0.26	0.118
	0.08	0.198		0.27	0.117
	0.08	0.196		0.27	0.126
	0.08	0.19		0.27	0.124
	0.08	0.175		0.27	0.124
	0.09	0.169		0.27	0.121
	0.09	0.16		0.27	0.118
	0.09	0.15		0.27	0.105
	0.09	0.14		0.27	0.101
	0.09	0.132		0.27	0.092
	0.1	0.13		0.27	0.087
	0.11	0.128		0.27	0.084
	0.11	0.118		0.27	0.081
	0.12	0.116		0.28	0.082
	0.13	0.108		0.28	0.079
	0.13	0.105		0.28	0.083
	0.13	0.111		0.28	0.081
	0.14	0.116		0.28	0.073
	0.14	0.126		0.28	0.071
	0.15	0.135		0.29	0.071
	0.15	0.137		0.29	0.071
	0.15	0.14		0.29	0.074
	0.15	0.145		0.29	0.074
	0.15	0.143		0.29	0.071
	0.15	0.142		0.29	0.07
	0.15	0.137		0.29	0.065
	0.15	0.131		0.29	0.059
	0.15	0.124		0.29	0.052
	0.15	0.113		0.29	0.045
	0.15	0.11		0.28	0.046
	0.15	0.103		0.28	0.039
	0.15	0.09		0.28	0.035
	0.15	0.076		0.28	0.031
	0.15	0.059		0.29	0.029
	0.15	0.049		0.29	0.031
	0.15	0.042		0.29	0.027
	0.15	0.035		0.28	0.025
	0.15	0.026		0.28	0.022
	0.15	0.026		0.28	0.02
	0.15	0.023		0.28	0.02
	0.15	0.024		0.28	0.023
	0.15	0.027		0.28	0.023
	0.15	0.03		0.28	0.023
	0.15	0.03		0.29	0.028
	0.15	0.027		0.29	0.027
	0.15	0.029		0.28	0.03
	0.14	0.033		0.28	0.03
	0.15	0.036		0.28	0.03
	0.14	0.036		0.29	0.032
	0.14	0.036		0.29	0.031
	0.14	0.039		0.29	0.031
	0.14	0.044		0.29	0.026
	0.14	0.047		0.29	0.029
	0.14	0.047		0.29	0.029
	0.14	0.044		0.29	0.029
	0.14	0.044		0.29	0.031
	0.14	0.043		0.29	0.034
	0.14	0.043		0.29	0.038
	0.14	0.039		0.29	0.036
	0.14	0.039		0.29	0.036
	0.14	0.042		0.29	0.036
	0.14	0.039		0.29	0.036
	0.14	0.035		0.29	0.039
	0.14	0.035		0.29	0.04
	0.14	0.032		0.29	0.04
	0.14	0.029		0.29	0.043
	0.14	0.024		0.29	0.047
	0.14	0.024		0.29	0.048
	0.14	0.023		0.29	0.052
	0.14	0.026		0.29	0.052
	0.14	0.026		0.29	0.047
	0.14	0.027		0.29	0.047
	0.14	0.027		0.3	0.046
	0.14	0.027		0.3	0.044
	0.14	0.027		0.3	0.041
	0.14	0.023		0.3	0.037
	0.14	0.023		0.3	0.041
	0.13	0.027		0.3	0.037
	0.14	0.027		0.3	0.037
	0.13	0.03		0.3	0.037
	0.13	0.035		0.3	0.034
	0.13	0.038		0.3	0.034
	0.13	0.044		0.3	0.029
	0.14	0.044		0.3	0.026
	0.14	0.044		0.3	0.027
	0.14	0.044		0.3	0.032
	0.14	0.041		0.31	0.036
	0.16	0.042		0.3	0.036
	0.16	0.049		0.3	0.039
	0.17	0.059		0.3	0.041
	0.17	0.079		0.3	0.044
	0.17	0.102		0.3	0.041
	0.18	0.1		0.3	0.041
	0.18	0.113		0.3	0.041
	0.19	0.117		0.3	0.041
	0.19	0.123		0.3	0.046
	0.19	0.127		0.3	0.049
	0.2	0.125		0.3	0.049
	0.2	0.129		0.3	0.046
	0.21	0.132		0.3	0.041
	0.21	0.136		0.3	0.04
	0.21	0.145		0.3	0.033
	0.21	0.151		0.3	0.029
	0.21	0.154		0.3	0.026
	0.21	0.153		0.3	0.024
	0.22	0.136		0.3	0.024
	0.22	0.117		0.3	0.027
	0.22	0.117		0.31	0.03
	0.22	0.106		0.31	0.027
	0.23	0.101		0.31	0.026
	0.23	0.095		0.31	0.026
	0.23	0.093		0.31	0.019
	0.23	0.095		0.31	0.024
	0.24	0.1		0.31	0.029
	0.24	0.11		0.31	0.032
	0.24	0.11		0.3	0.033
	0.24	0.114		0.31	0.04
	0.24	0.108		0.31	0.044
	0.25	0.106		0.31	0.048
	0.25	0.107		0.31	0.05
	0.25	0.114		0.31	0.047
	0.25	0.125		0.31	0.05
	0.25	0.134		0.31	0.054
	0.25	0.14		0.31	0.058
	0.25	0.146		0.3	0.063
	0.25	0.148		0.3	0.063
	0.25	0.154		0.3	0.067
	0.25	0.153		0.3	0.062
	0.26	0.151		0.3	0.057
	0.26	0.145		0.3	0.057
	0.27	0.144		0.3	0.056
	0.27	0.135		0.3	0.053
	0.27	0.143		0.3	0.051
	0.28	0.153		0.3	0.051
	0.28	0.163		0.3	0.052
	0.28	0.169		0.3	0.056
	0.28	0.171		0.3	0.049
	0.28	0.17		0.3	0.042
	0.29	0.172		0.3	0.037
	0.29	0.175		0.3	0.03
	0.29	0.178		0.3	0.028
	0.3	0.187		0.3	0.028
	0.3	0.195		0.3	0.028
	0.3	0.199		0.3	0.028
	0.3	0.204		0.3	0.029
	0.3	0.212		0.3	0.026
	0.31	0.22		0.3	0.023
	0.31	0.216		0.3	0.023
	0.31	0.208		0.3	0.023
	0.31	0.201		0.3	0.023
	0.32	0.198		0.3	0.02
	0.31	0.195		0.3	0.02
	0.31	0.194		0.3	0.02
	0.32	0.191		0.3	0.023
	0.32	0.186		0.3	0.023
	0.32	0.183		0.3	0.021
	0.32	0.171		0.3	0.021
	0.32	0.158		0.3	0.021
	0.32	0.15		0.3	0.021
	0.32	0.141		0.3	0.021
	0.33	0.13		0.3	0.023
	0.33	0.124		0.3	0.026
	0.32	0.12		0.3	0.026
	0.32	0.12		0.3	0.026
	0.32	0.114		0.3	0.027
	0.33	0.108		0.3	0.032
	0.32	0.095		0.3	0.038
	0.33	0.087		0.3	0.045
	0.33	0.08		0.3	0.042
	0.32	0.076		0.3	0.045
	0.33	0.07		0.3	0.045
	0.32	0.066		0.3	0.042
	0.32	0.062		0.3	0.046
	0.33	0.06		0.3	0.05
	0.32	0.053		0.3	0.048
	0.33	0.05		0.3	0.049
	0.33	0.047		0.3	0.049
	0.33	0.042		0.3	0.046
	0.33	0.032		0.3	0.046
	0.33	0.03		0.3	0.042
	0.33	0.027		0.3	0.037
	0.33	0.031		0.3	0.034
	0.33	0.032		0.3	0.027
	0.33	0.033		0.3	0.027
	0.33	0.033		0.3	0.027
	0.33	0.038		0.3	0.027
	0.33	0.038		0.3	0.027
	0.33	0.04		0.3	0.022
	0.33	0.04		0.3	0.026
	0.33	0.04		0.3	0.023
	0.33	0.043		0.3	0.023
	0.33	0.04		0.3	0.028
	0.33	0.043		0.3	0.032
	0.33	0.043		0.31	0.034
	0.33	0.043		0.31	0.038
	0.32	0.046		0.31	0.045
	0.32	0.045		0.31	0.046
	0.32	0.045		0.31	0.049
	0.32	0.04		0.31	0.052
	0.32	0.04		0.31	0.052
	0.32	0.039		0.31	0.055
	0.32	0.036		0.31	0.057
	0.32	0.033		0.31	0.057
	0.32	0.03		0.31	0.053
	0.32	0.03		0.32	0.057
	0.32	0.03		0.31	0.057
	0.32	0.03		0.32	0.054
	0.33	0.03		0.32	0.049
	0.33	0.03		0.32	0.052
	0.33	0.03		0.32	0.05
	0.33	0.026		0.33	0.05
	0.33	0.027		0.32	0.049
	0.33	0.029		0.33	0.051
	0.33	0.032		0.33	0.047
	0.33	0.029		0.33	0.047
	0.33	0.03		0.33	0.044
	0.33	0.034		0.33	0.042
	0.33	0.037		0.33	0.042
	0.33	0.04		0.33	0.042
	0.33	0.04		0.33	0.042
	0.33	0.04		0.33	0.042
	0.33	0.044		0.33	0.037
	0.33	0.041		0.33	0.044
	0.33	0.044		0.33	0.041
	0.33	0.04		0.34	0.041
	0.33	0.04		0.34	0.037
	0.33	0.041		0.34	0.038
	0.33	0.037		0.34	0.034
	0.33	0.033		0.34	0.038
	0.33	0.033		0.34	0.038
	0.33	0.029		0.34	0.041
	0.33	0.024		0.34	0.046
	0.33	0.022		0.34	0.046
	0.33	0.022		0.35	0.046
	0.33	0.025		0.34	0.048
	0.33	0.022		0.34	0.044
	0.33	0.021		0.34	0.048
	0.33	0.021		0.34	0.041
	0.33	0.017		0.34	0.037
	0.33	0.017		0.34	0.033
	0.33	0.017		0.34	0.03
	0.33	0.013		0.34	0.03
	0.33	0.013		0.34	0.03
	0.33	0.016		0.34	0.025
	0.33	0.016		0.34	0.022
	0.33	0.016		0.34	0.019
	0.33	0.016		0.34	0.014
	0.32	0.016		0.34	0.019
	0.32	0.013		0.34	0.016
	0.32	0.014		0.34	0.011
	0.32	0.021		0.34	0.014
	0.31	0.023		0.34	0.014
	0.31	0.027		0.34	0.016
	0.31	0.035		0.34	0.019
	0.31	0.035		0.34	0.019
	0.31	0.041		0.34	0.023
	0.3	0.05		0.34	0.023
	0.3	0.058		0.34	0.023
	0.3	0.059		0.34	0.03
	0.3	0.068		0.34	0.037
	0.3	0.078		0.34	0.041
	0.3	0.086		0.34	0.044
	0.3	0.098		0.34	0.046
	0.3	0.108		0.34	0.053
	0.3	0.111		0.34	0.06
	0.3	0.113		0.34	0.061
	0.3	0.119		0.34	0.064
	0.3	0.123		0.34	0.065
	0.29	0.119		0.34	0.068
	0.3	0.132		0.34	0.078
	0.29	0.141		0.34	0.084
	0.29	0.142		0.33	0.1
	0.3	0.147		0.33	0.107
	0.29	0.153		0.33	0.112
	0.29	0.154		0.32	0.125
	0.29	0.147		0.32	0.128
	0.29	0.143		0.32	0.138
	0.29	0.133		0.31	0.145
	0.29	0.127		0.31	0.151
	0.28	0.124		0.31	0.157
	0.28	0.124		0.3	0.17
	0.28	0.124		0.3	0.183
	0.28	0.125		0.29	0.196
	0.28	0.135		0.29	0.201
	0.28	0.132		0.28	0.208
	0.28	0.125		0.28	0.211
	0.28	0.122		0.28	0.198
	0.27	0.118		0.28	0.205
	0.27	0.117		0.27	0.203
	0.27	0.124		0.27	0.19
	0.27	0.137		0.27	0.196
	0.26	0.143		0.26	0.193
	0.26	0.153		0.26	0.192
	0.26	0.163		0.26	0.186
	0.25	0.178		0.26	0.183
	0.25	0.191		0.25	0.177
	0.25	0.194		0.25	0.161
	0.25	0.2		0.25	0.149
	0.24	0.198		0.25	0.141
	0.24	0.204		0.25	0.128
	0.24	0.203		0.25	0.119
	0.24	0.206		0.25	0.118
	0.24	0.222		0.25	0.107
	0.24	0.23		0.25	0.099
	0.24	0.229		0.26	0.095
	0.24	0.225		0.26	0.082
	0.24	0.228		0.26	0.075
	0.24	0.229		0.26	0.062
	0.24	0.22		0.26	0.058
	0.24	0.204		0.26	0.049
	0.23	0.184		0.26	0.039
	0.23	0.171		0.26	0.035
	0.23	0.158		0.26	0.031
	0.23	0.152		0.26	0.028
	0.22	0.139		0.26	0.024
	0.22	0.134		0.26	0.02
	0.21	0.127		0.26	0.015
	0.21	0.108		0.26	0.012
	0.21	0.101		0.26	0.01
	0.21	0.09		0.26	0.011
	0.21	0.084		0.26	0.011
	0.21	0.08		0.26	0.008
	0.21	0.072		0.26	0.008
	0.21	0.072		0.26	0.005
	0.21	0.075		0.26	0.008
	0.21	0.072		0.26	0.008
	0.21	0.072		0.26	0.011
	0.2	0.068		0.25	0.011
	0.2	0.067		0.26	0.014
	0.2	0.069		0.26	0.014
	0.19	0.072		0.26	0.014
	0.19	0.076		0.26	0.014
	0.19	0.075		0.26	0.017
	0.19	0.073		0.26	0.021
	0.19	0.081		0.26	0.016
	0.19	0.077		0.26	0.016
	0.2	0.073		0.26	0.021
	0.19	0.071		0.26	0.021
	0.19	0.07		0.26	0.021
	0.19	0.067		0.26	0.018
	0.19	0.071		0.26	0.018
	0.19	0.076		0.26	0.014
	0.19	0.079		0.26	0.014
	0.19	0.079		0.26	0.014
	0.19	0.074		0.26	0.014
	0.19	0.074		0.26	0.014
	0.19	0.067		0.26	0.014
	0.18	0.064		0.26	0.014
	0.18	0.058		0.26	0.011
	0.18	0.047		0.26	0.011
	0.18	0.047		0.26	0.011
	0.18	0.046		0.26	0.007
	0.17	0.042		0.26	0.007
	0.17	0.042		0.26	0.007
	0.17	0.042		0.26	0.007
	0.17	0.041		0.26	0.007
	0.16	0.043		0.26	0.007
	0.16	0.043		0.26	0.007
	0.16	0.043		0.26	0.006
	0.16	0.046		0.26	0.01
	0.15	0.049		0.26	0.01
	0.15	0.057		0.26	0.01
	0.14	0.059		0.26	0.01
	0.14	0.069		0.26	0.01
	0.13	0.074		0.26	0.01
	0.12	0.081		0.26	0.01
	0.12	0.087		0.26	0.013
	0.11	0.097		0.26	0.013
	0.1	0.106		0.26	0.013
	0.09	0.114		0.26	0.013
	0.09	0.133		0.26	0.016
	0.08	0.148		0.26	0.019
	0.07	0.158		0.26	0.019
	0.07	0.171		0.26	0.019
	0.06	0.187		0.26	0.016
	0.05	0.194		0.26	0.016
	0.05	0.203		0.26	0.016
	0.04	0.205		0.26	0.013
	0.03	0.208		0.26	0.016
	0.03	0.219		0.26	0.016
	0.03	0.216		0.26	0.016
	0.03	0.227		0.26	0.013
	0.03	0.232		0.26	0.013
	0.02	0.237		0.26	0.013
	0.02	0.233		0.26	0.013
	0.01	0.218		0.26	0.01
	0.01	0.202		0.26	0.006
	0.01	0.199		0.26	0.006
	0.01	0.194		0.26	0.003
	0.01	0.186		0.26	0.006
	0	0.178		0.26	0.01
	0	0.172		0.26	0.01
	0	0.179		0.26	0.01
	0.02	0.185		0.26	0.01
	0.03	0.182		0.26	0.01
	0.03	0.187		0.26	0.013
	0.04	0.188		0.26	0.016
	0.04	0.188		0.26	0.016
	0.04	0.201		0.26	0.016
	0.05	0.214		0.26	0.019
	0.05	0.222		0.26	0.022
	0.05	0.233		0.26	0.022
	0.06	0.245		0.26	0.027
	0.06	0.245		0.26	0.03
	0.06	0.243		0.26	0.03
	0.06	0.248		0.27	0.03
	0.07	0.245		0.27	0.037
	0.07	0.232		0.27	0.044
	0.07	0.22		0.27	0.051
	0.07	0.214		0.26	0.06
	0.07	0.205		0.26	0.065
	0.07	0.183		0.26	0.069
	0.08	0.17		0.26	0.075
	0.09	0.145		0.26	0.082
	0.1	0.131		0.26	0.086
	0.1	0.133		0.26	0.084
	0.11	0.129		0.26	0.089
	0.12	0.119		0.26	0.084
	0.12	0.127		0.26	0.081
	0.13	0.134		0.26	0.078
	0.14	0.134		0.26	0.078
	0.14	0.141		0.26	0.071
	0.15	0.157		0.26	0.064
	0.15	0.167		0.26	0.057
	0.16	0.17		0.26	0.051
	0.16	0.182		0.26	0.044
	0.17	0.196		0.26	0.041
	0.17	0.206		0.26	0.039
	0.18	0.209		0.26	0.032
	0.19	0.212		0.26	0.029
	0.19	0.203		0.26	0.027
	0.2	0.204		0.26	0.025
	0.2	0.205		0.26	0.029
	0.21	0.198		0.26	0.029
	0.21	0.195		0.26	0.032
	0.21	0.195		0.26	0.029
	0.21	0.191		0.26	0.029
	0.21	0.181		0.26	0.029
	0.21	0.167		0.26	0.026
	0.21	0.16		0.26	0.026
	0.21	0.144		0.26	0.026
	0.21	0.13		0.26	0.021
	0.22	0.117		0.26	0.019
	0.22	0.118		0.26	0.023
	0.22	0.111		0.26	0.023
	0.23	0.113		0.26	0.023
	0.23	0.107		0.26	0.022
	0.23	0.103		0.26	0.022
	0.24	0.097		0.26	0.025
	0.23	0.091		0.27	0.022
	0.24	0.084		0.27	0.025
	0.24	0.086		0.26	0.025
	0.23	0.084		0.27	0.025
	0.23	0.089		0.27	0.028
	0.24	0.096		0.27	0.025
	0.24	0.101		0.27	0.028
	0.24	0.105		0.27	0.03
	0.24	0.108		0.27	0.03
	0.24	0.103		0.27	0.027
	0.24	0.104		0.27	0.024
	0.24	0.099		0.26	0.027
	0.24	0.095		0.26	0.029
	0.24	0.091		0.27	0.029
	0.24	0.091		0.27	0.026
	0.24	0.087		0.26	0.026
	0.24	0.086		0.27	0.023
	0.24	0.084		0.27	0.023
	0.24	0.08		0.27	0.023
	0.24	0.08		0.27	0.02
	0.24	0.083		0.27	0.02
	0.24	0.093		0.27	0.02
	0.24	0.099		0.27	0.017
	0.24	0.105		0.27	0.017
	0.24	0.116		0.27	0.017
	0.25	0.121		0.27	0.017
	0.25	0.13		0.27	0.014
	0.25	0.134		0.27	0.012
	0.26	0.134		0.27	0.012
	0.26	0.132		0.27	0.012
	0.26	0.133		0.27	0.015
	0.26	0.134		0.27	0.018
	0.26	0.129		0.26	0.018
	0.26	0.132		0.26	0.023
	0.26	0.13		0.26	0.023
	0.26	0.122		0.26	0.023
	0.26	0.113		0.26	0.019
	0.26	0.108		0.26	0.022
	0.26	0.105		0.26	0.018
	0.27	0.096		0.26	0.018
	0.27	0.092		0.26	0.018
	0.27	0.083		0.26	0.018
	0.27	0.079		0.26	0.02
	0.27	0.079		0.26	0.02
	0.27	0.081		0.26	0.023
	0.27	0.086		0.26	0.02
	0.27	0.086		0.26	0.02
	0.27	0.084		0.26	0.023
	0.28	0.079		0.26	0.018
	0.28	0.079		0.26	0.022
	0.28	0.079		0.26	0.022
	0.29	0.083		0.26	0.022
	0.29	0.085		0.26	0.019
	0.3	0.091		0.26	0.019
	0.3	0.099		0.26	0.019
	0.3	0.109		0.26	0.019
	0.3	0.128		0.26	0.019
	0.3	0.138		0.26	0.016
	0.31	0.152		0.26	0.013
	0.31	0.166		0.26	0.01
	0.32	0.167		0.26	0.01
	0.32	0.173		0.26	0.006
	0.32	0.183		0.26	0.003
	0.32	0.189		0.26	0.003
	0.32	0.197		0.26	0.003
	0.32	0.207		0.26	0.003
	0.32	0.204		0.26	0.003
	0.32	0.207		0.26	0.003
	0.32	0.194		0.26	0.003
	0.32	0.186		0.26	0.006
	0.32	0.175		0.26	0.01
	0.32	0.158		0.26	0.01
	0.32	0.148		0.26	0.01
	0.33	0.135		0.26	0.013
	0.33	0.118		0.26	0.013
	0.33	0.114		0.26	0.013
	0.33	0.107		0.26	0.017
	0.32	0.097		0.26	0.017
	0.32	0.097		0.26	0.017
	0.32	0.095		0.26	0.014
	0.32	0.089		0.26	0.018
	0.32	0.088		0.26	0.018
	0.32	0.082		0.26	0.018
	0.32	0.087		0.26	0.018
	0.32	0.085		0.26	0.014
	0.32	0.082		0.26	0.014
	0.32	0.076		0.26	0.014
	0.32	0.076		0.26	0.014
	0.32	0.073		0.26	0.011
	0.32	0.073		0.26	0.011
	0.32	0.069		0.26	0.014
	0.32	0.063		0.26	0.01
	0.32	0.063		0.26	0.01
	0.32	0.053		0.26	0.013
	0.32	0.042		0.26	0.013
	0.32	0.038		0.26	0.01
	0.32	0.035		0.26	0.013
	0.32	0.031		0.26	0.013
	0.33	0.029		0.26	0.013
	0.33	0.029		0.26	0.015
	0.33	0.034		0.26	0.012
	0.33	0.036		0.26	0.012
	0.33	0.032		0.26	0.012
	0.33	0.034		0.26	0.015
	0.33	0.034		0.26	0.015
	0.33	0.035		0.26	0.012
	0.33	0.039		0.26	0.012
	0.33	0.04		0.25	0.015
	0.33	0.04		0.25	0.012
	0.33	0.043		0.25	0.014
	0.33	0.04		0.25	0.014
	0.33	0.037		0.25	0.015
	0.34	0.043		0.25	0.019
	0.34	0.044		0.25	0.023
	0.34	0.055		0.24	0.028
	0.34	0.057		0.24	0.035
	0.34	0.058		0.24	0.043
	0.34	0.064		0.24	0.053
	0.34	0.064		0.24	0.055
	0.34	0.064		0.24	0.057
	0.33	0.062		0.24	0.06
	0.33	0.059		0.24	0.063
	0.33	0.059		0.24	0.06
	0.33	0.059		0.23	0.07
	0.32	0.061		0.23	0.074
	0.33	0.067		0.23	0.078
	0.32	0.077		0.23	0.078
	0.33	0.082		0.22	0.082
	0.32	0.091		0.22	0.087
	0.32	0.085		0.22	0.089
	0.32	0.082		0.21	0.093
	0.32	0.083		0.21	0.095
	0.32	0.076		0.21	0.089
	0.32	0.077		0.21	0.094
	0.32	0.08		0.21	0.099
	0.32	0.083		0.21	0.111
	0.31	0.09		0.2	0.115
	0.31	0.091		0.2	0.13
	0.31	0.094		0.2	0.137
	0.31	0.096		0.19	0.14
	0.31	0.099		0.19	0.147
	0.31	0.099		0.19	0.161
	0.31	0.09		0.18	0.167
	0.31	0.086		0.18	0.17
	0.31	0.086		0.18	0.174
	0.31	0.089		0.18	0.173
	0.3	0.095		0.18	0.176
	0.3	0.101		0.17	0.182
	0.3	0.107		0.17	0.181
	0.3	0.11		0.17	0.174
	0.3	0.11		0.17	0.162
	0.3	0.11		0.17	0.159
	0.3	0.105		0.17	0.143
	0.3	0.105		0.17	0.132
	0.3	0.105		0.17	0.125
	0.29	0.102		0.17	0.119
	0.29	0.095		0.17	0.109
	0.29	0.103		0.17	0.111
	0.29	0.1		0.16	0.112
	0.29	0.1		0.16	0.106
	0.29	0.104		0.16	0.099
	0.28	0.101		0.16	0.09
	0.28	0.101		0.16	0.085
	0.28	0.097		0.17	0.08
	0.28	0.095		0.17	0.089
	0.28	0.095		0.17	0.096
	0.27	0.093		0.17	0.101
	0.27	0.097		0.17	0.105
	0.27	0.1		0.17	0.11
	0.27	0.104		0.17	0.118
	0.26	0.11		0.17	0.123
	0.26	0.124		0.17	0.121
	0.25	0.127		0.17	0.114
	0.25	0.131		0.17	0.112
	0.25	0.143		0.18	0.121
	0.25	0.152		0.18	0.125
	0.25	0.159		0.18	0.129
	0.25	0.166		0.18	0.138
	0.25	0.172		0.18	0.147
	0.25	0.175		0.18	0.146
	0.24	0.179		0.18	0.144
	0.24	0.184		0.19	0.145
	0.24	0.184		0.19	0.147
	0.23	0.187		0.19	0.147
	0.23	0.188		0.19	0.145
	0.23	0.185		0.19	0.144
	0.23	0.18		0.19	0.144
	0.23	0.181		0.19	0.144
	0.23	0.183		0.19	0.141
	0.23	0.175		0.19	0.132
	0.23	0.173		0.19	0.127
	0.23	0.172		0.2	0.128
	0.23	0.171		0.2	0.119
	0.23	0.171		0.2	0.11
	0.23	0.171		0.2	0.103
	0.22	0.174		0.2	0.1
	0.22	0.167		0.2	0.097
	0.22	0.164		0.2	0.097
	0.21	0.158		0.2	0.094
	0.21	0.148		0.2	0.091
	0.2	0.141		0.2	0.091
	0.21	0.135		0.2	0.087
	0.2	0.129		0.2	0.084
	0.2	0.121		0.2	0.078
	0.19	0.121		0.2	0.074
	0.19	0.114		0.2	0.079
	0.18	0.105		0.2	0.08
	0.17	0.1		0.21	0.082
	0.17	0.096		0.21	0.087
	0.16	0.104		0.21	0.097
	0.15	0.107		0.21	0.1
	0.15	0.12		0.21	0.097
	0.14	0.126		0.21	0.097
	0.14	0.127		0.21	0.094
	0.13	0.144		0.21	0.09
	0.12	0.156		0.21	0.087
	0.11	0.167		0.21	0.084
	0.1	0.174		0.21	0.08
	0.1	0.186		0.21	0.08
	0.09	0.195		0.21	0.08
	0.08	0.199		0.21	0.073
	0.08	0.212		0.21	0.065
	0.08	0.221		0.21	0.058
	0.07	0.222		0.21	0.051
	0.06	0.218		0.21	0.041
	0.06	0.208		0.21	0.034
	0.05	0.206		0.21	0.029
	0.05	0.212		0.21	0.026
	0.04	0.217		0.21	0.026
	0.04	0.22		0.21	0.023
	0.04	0.216		0.21	0.025
	0.03	0.219		0.21	0.025
	0.03	0.216		0.21	0.028
	0.03	0.204		0.21	0.028
	0.03	0.195		0.21	0.025
	0.02	0.194		0.21	0.025
	0.02	0.188		0.21	0.023
	0.02	0.175		0.21	0.026
	0.01	0.175		0.21	0.023
	0.01	0.17		0.21	0.026
	0.01	0.17		0.21	0.03
	0.01	0.167		0.21	0.035
	0	0.165		0.21	0.035
	0	0.165		0.21	0.035
	0	0.155		0.21	0.035
	0	0.163		0.21	0.028
	0	0.154		0.21	0.028
	0	0.148		0.21	0.025
	0	0.148		0.21	0.026
	0	0.142		0.21	0.031
	0	0.134		0.22	0.034
	0.01	0.126		0.22	0.038
	0.01	0.123		0.22	0.038
	0.01	0.119		0.22	0.042
	0.02	0.118		0.22	0.039
	0.02	0.129		0.22	0.038
	0.02	0.14		0.22	0.039
	0.02	0.137		0.22	0.039
	0.03	0.137		0.22	0.04
	0.03	0.146		0.22	0.04
	0.04	0.147		0.22	0.045
	0.04	0.156		0.22	0.048
	0.04	0.161		0.22	0.05
	0.04	0.168		0.22	0.045
	0.03	0.171		0.22	0.041
	0.03	0.177		0.22	0.041
	0.03	0.172		0.22	0.037
	0.03	0.176		0.22	0.033
	0.03	0.172		0.22	0.035
	0.03	0.173		0.22	0.038
	0.03	0.155		0.22	0.033
	0.03	0.139		0.22	0.029
	0.03	0.127		0.22	0.028
	0.03	0.117		0.22	0.026
	0.04	0.101		0.22	0.026
	0.04	0.084		0.22	0.022
	0.04	0.064		0.22	0.023
	0.04	0.06		0.22	0.021
	0.05	0.055		0.22	0.026
	0.06	0.054		0.22	0.029
	0.06	0.049		0.22	0.026
	0.07	0.058		0.22	0.029
	0.07	0.068		0.22	0.029
	0.08	0.076		0.22	0.024
	0.08	0.081		0.22	0.024
	0.09	0.095		0.22	0.027
	0.09	0.103		0.22	0.027
	0.1	0.113		0.22	0.025
	0.1	0.127		0.22	0.022
	0.1	0.138		0.22	0.022
	0.12	0.145		0.22	0.025
	0.12	0.155		0.22	0.024
	0.13	0.157		0.22	0.024
	0.14	0.163		0.22	0.019
	0.15	0.176		0.22	0.016
	0.15	0.186		0.22	0.016
	0.15	0.196		0.22	0.016
	0.16	0.196		0.22	0.016
	0.17	0.201		0.22	0.019
	0.17	0.199		0.22	0.016
	0.18	0.198		0.22	0.013
	0.18	0.198		0.22	0.013
	0.19	0.201		0.22	0.013
	0.19	0.2		0.22	0.013
	0.19	0.197		0.22	0.013
	0.2	0.194		0.22	0.01
	0.2	0.193		0.22	0.009
	0.2	0.191		0.22	0.009
	0.2	0.185		0.22	0.013
	0.21	0.168		0.22	0.013
	0.21	0.163		0.22	0.016
	0.22	0.15		0.22	0.013
	0.22	0.139		0.22	0.017
	0.22	0.134		0.22	0.019
	0.22	0.131		0.22	0.025
	0.22	0.123		0.22	0.032
	0.23	0.121		0.22	0.044
	0.23	0.115		0.22	0.048
	0.23	0.107		0.22	0.051
	0.23	0.101		0.21	0.056
	0.23	0.096		0.21	0.059
	0.24	0.094		0.21	0.061
	0.24	0.09		0.21	0.061
	0.24	0.087		0.21	0.06
	0.24	0.096		0.21	0.063
	0.24	0.092		0.21	0.062
	0.24	0.093		0.2	0.067
	0.24	0.094		0.2	0.07
	0.24	0.088		0.2	0.073
	0.24	0.084		0.19	0.07
	0.24	0.082		0.19	0.072
	0.24	0.074		0.19	0.063
	0.24	0.07		0.18	0.068
	0.24	0.069		0.18	0.071
	0.24	0.069		0.18	0.071
	0.24	0.068		0.17	0.078
	0.24	0.064		0.17	0.08
	0.24	0.06		0.17	0.086
	0.24	0.063		0.17	0.09
	0.24	0.061		0.17	0.087
	0.24	0.065		0.17	0.084
	0.24	0.064		0.17	0.083
	0.24	0.065		0.17	0.079
	0.24	0.068		0.16	0.075
	0.24	0.069		0.16	0.074
	0.24	0.075		0.16	0.07
	0.24	0.074		0.16	0.073
	0.24	0.07		0.16	0.067
	0.24	0.068		0.16	0.068
	0.24	0.068		0.15	0.07
	0.24	0.068		0.15	0.067
	0.24	0.07		0.15	0.063
	0.24	0.074		0.14	0.066
	0.24	0.067		0.14	0.067
	0.24	0.06		0.13	0.077
	0.24	0.057		0.13	0.09
	0.24	0.057		0.12	0.107
	0.24	0.055		0.11	0.122
	0.24	0.054		0.1	0.135
	0.25	0.055		0.1	0.149
	0.25	0.051		0.09	0.157
	0.25	0.061		0.08	0.164
	0.25	0.069		0.08	0.173
	0.25	0.077		0.07	0.18
	0.25	0.085		0.07	0.183
	0.25	0.089		0.06	0.193
	0.26	0.095		0.05	0.203
	0.26	0.101		0.05	0.2
	0.26	0.11		0.04	0.203
	0.27	0.117		0.04	0.207
	0.28	0.118		0.03	0.204
	0.28	0.122		0.03	0.193
	0.28	0.134		0.02	0.186
	0.28	0.149		0.02	0.177
	0.28	0.155		0.02	0.166
	0.28	0.167		0.01	0.158
	0.28	0.167		0.01	0.145
	0.29	0.167		0.01	0.135
	0.29	0.164		0.01	0.125
	0.29	0.158		0.01	0.119
	0.3	0.154		0.01	0.106
	0.3	0.154		0.01	0.092
	0.3	0.16		0.01	0.085
	0.3	0.169		0.01	0.075
	0.3	0.176		0.01	0.062
	0.31	0.188		0.01	0.052
	0.3	0.188		0.01	0.045
	0.31	0.182		0.01	0.039
	0.31	0.167		0.01	0.035
	0.31	0.159		0.01	0.032
	0.31	0.156		0.01	0.03
	0.31	0.15		0.02	0.034
	0.31	0.152		0.02	0.037
	0.31	0.153		0.02	0.037
	0.31	0.155		0.02	0.036
	0.31	0.159		0.02	0.033
	0.31	0.153		0.02	0.036
	0.31	0.142		0.02	0.036
	0.31	0.123		0.02	0.036
	0.31	0.106		0.02	0.04
	0.31	0.09		0.02	0.045
	0.31	0.079		0.02	0.042
	0.3	0.074		0.02	0.037
	0.31	0.069		0.02	0.034
	0.3	0.069		0.01	0.034
	0.3	0.055		0.01	0.035
	0.3	0.053		0.01	0.039
	0.3	0.047		0.01	0.037
	0.31	0.047		0.01	0.038
	0.3	0.047		0	0.04
	0.31	0.05		0	0.047
	0.3	0.053		0	0.047
	0.3	0.059		0	0.051
	0.31	0.065		0	0.051
	0.3	0.069		0	0.053
	0.3	0.072		0	0.051
	0.31	0.075		0	0.058
	0.31	0.074		0	0.061
	0.31	0.078		0	0.065
	0.31	0.078		0	0.065
	0.31	0.082		0	0.064
	0.31	0.079		0	0.064
	0.31	0.079		0	0.067
	0.31	0.077		0	0.078
	0.31	0.073		0	0.097
	0.31	0.063		0	0.096
	0.31	0.058		0	0.105
	0.31	0.048		0.01	0.125
	0.31	0.042		0.01	0.141
	0.31	0.042		0.02	0.134
	0.31	0.039		0.02	0.148
	0.31	0.035		0.03	0.157
	0.31	0.035		0.03	0.172
	0.31	0.031		0.03	0.176
	0.31	0.029		0.03	0.179
	0.31	0.026		0.03	0.18
	0.31	0.027		0.04	0.183
	0.31	0.031		0.04	0.19
	0.31	0.031		0.04	0.184
	0.32	0.031		0.05	0.169
	0.31	0.034		0.05	0.169
	0.32	0.033		0.05	0.165
	0.32	0.04		0.05	0.145
	0.32	0.043		0.05	0.135
	0.32	0.04		0.05	0.139
	0.32	0.044		0.05	0.126
	0.32	0.044		0.05	0.113
	0.31	0.041		0.05	0.1
	0.31	0.044		0.05	0.1
	0.31	0.048		0.05	0.097
	0.31	0.052		0.05	0.092
	0.31	0.055		0.05	0.087
	0.31	0.053		0.05	0.072
	0.31	0.052		0.05	0.069
	0.31	0.056		0.05	0.06
	0.31	0.052		0.05	0.054
	0.31	0.054		0.05	0.053
	0.31	0.05		0.04	0.055
	0.31	0.047		0.04	0.053
	0.31	0.05		0.04	0.055
	0.31	0.049		0.03	0.061
	0.31	0.049		0.03	0.065
	0.31	0.052		0.03	0.065
	0.31	0.049		0.03	0.058
	0.31	0.043		0.03	0.058
	0.31	0.041		0.03	0.061
	0.31	0.035		0.03	0.056
	0.31	0.03		0.03	0.056
	0.31	0.027		0.03	0.05
	0.31	0.019		0.03	0.053
	0.31	0.019		0.03	0.053
	0.31	0.016		0.03	0.046
	0.31	0.015		0.03	0.042
	0.31	0.015		0.03	0.037
	0.31	0.015		0.03	0.031
	0.31	0.012		0.03	0.022
	0.31	0.016		0.03	0.017
	0.31	0.017		0.03	0.015
	0.31	0.02		0.03	0.018
	0.31	0.02		0.03	0.02
	0.31	0.017		0.03	0.017
	0.3	0.017		0.03	0.02
	0.31	0.02		0.03	0.02
	0.31	0.02		0.03	0.024
	0.31	0.023		0.02	0.024
	0.31	0.027		0.02	0.027
	0.31	0.027		0	0.039
	0.31	0.028		0	0.045
	0.31	0.032		0	0
	0.31	0.028		0	0
	0.31	0.033		0	0
	0.31	0.032		0	0
	0.31	0.028		0	0
	0.31	0.025		0	0
	0.31	0.025		0	0
	0.31	0.025		0	0
	0.31	0.028		0	0
	0.31	0.025		0	0
	0.31	0.025		0	0
	0.31	0.025		0	0
	0.31	0.021		0	0
	0.31	0.024			0
	0.31	0.024		0	0
	0.31	0.021		0	0
	0.31	0.025		0	0
	0.31	0.021		0	0
	0.31	0.017		0	0
	0.31	0.021		0	0
	0.31	0.021		0	0
	0.31	0.021		0	0
	0.31	0.021		0	0
	0.31	0.021		0	0
	0.31	0.024		0	0
	0.31	0.024		0	0
	0.31	0.021		0	0
	0.31	0.021		0	0
	0.31	0.018		0	0
	0.31	0.014		0	0
	0.31	0.014		0	0
	0.31	0.013		0	0
	0.31	0.016		0	0
	0.31	0.02		0	0
	0.31	0.019		0	0
	0.31	0.019		0	0
	0.31	0.024		0	0
	0.31	0.028		0	0
	0.31	0.025		0	0
	0.31	0.022		0	0
	0.31	0.022		0	0
	0.31	0.022		0	0
	0.31	0.026		0	0
	0.31	0.031		0	0
	0.31	0.036		0	0
	0.31	0.038		0	0
	0.31	0.035		0	0
	0.31	0.034		0	0
	0.31	0.034		0	0
	0.31	0.031		0	0
	0.31	0.031		0	0
	0.31	0.03		0	0
	0.31	0.029		0	0
	0.31	0.029		0	0
	0.31	0.032		0	0
	0.31	0.034		0	0
	0.31	0.034		0	0
	0.31	0.03		0	0
	0.31	0.028		0	0
	0.31	0.024		0	0
	0.31	0.025		0	0
	0.31	0.028		0	0
	0.31	0.025		0	0
	0.31	0.025		0	0
	0.31	0.028		0	0
	0.31	0.032		0	0
	0.31	0.032		0	0
	0.31	0.032		0	0
	0.31	0.032		0	0
	0.31	0.029		0	0
	0.31	0.027		0.06	0
	0.31	0.027			0
	0.31	0.027		0	0
	0.31	0.027		0	0
	0.31	0.027		0	0
	0.31	0.024		0	0
	0.31	0.023		0	0
	0.31	0.023		0	0
	0.31	0.019		0	0
	0.31	0.016		0	0
	0.31	0.015		0	0
	0.31	0.015		0	0
	0.31	0.012		0	0
	0.31	0.012		0	0
	0.31	0.015		0	0
	0.31	0.018		0	0
	0.31	0.018		0	0
	0.31	0.018		0	0
	0.31	0.018		0	0
	0.31	0.022		0	0
	0.31	0.022		0	0
	0.31	0.023		0	0
	0.31	0.026		0	0
	0.31	0.026		0	0
	0.31	0.029		0	0
	0.31	0.026		0	0
	0.31	0.023		0	0
	0.31	0.023		0	0
	0.31	0.023		0	0
	0.31	0.02		0	0
	0.31	0.019		0	0
	0.31	0.019		0	0
	0.31	0.023		0	0
	0.31	0.024		0	0
	0.31	0.024		0	0
	0.31	0.027		0	0
	0.31	0.024		0	0
	0.31	0.024		0	0
	0.31	0.024		0	0
	0.31	0.024		0	0
	0.31	0.027		0	0
	0.31	0.03		0	0
	0.31	0.03		0	0
	0.31	0.035		0	0
	0.31	0.035		0	0
	0.31	0.036		0	0
	0.31	0.036		0	0
	0.31	0.036		0	0
	0.31	0.032		0	0
	0.31	0.033		0	0
	0.31	0.034		0	0
	0.31	0.037		0	0
	0.31	0.038		0	0
	0.31	0.041		0	0
	0.31	0.038		0	0
	0.31	0.034		0	0
	0.31	0.031		0	0
	0.31	0.033		0	0
	0.31	0.033		0	0
	0.31	0.036		0	0
	0.31	0.035		0	0
	0.31	0.039		0	0
	0.31	0.04		0	0
	0.31	0.043		0	0
	0.31	0.042		0	0
	0.31	0.04		0	0
	0.31	0.037		0	0
	0.31	0.036		0	0
	0.31	0.036		0	0
	0.31	0.039		0	0
	0.31	0.039		0	0
	0.31	0.039		0	0
	0.31	0.04		0	0
	0.31	0.036		0	0
	0.31	0.033		0	0
	0.31	0.033		0	0
	0.31	0.031		0	0
	0.31	0.03		0	0
	0.31	0.032		0	0
	0.31	0.032		0	0
	0.31	0.032		0	0
	0.31	0.035		0.01	0.088
	0.31	0.036		0.01	0.1
	0.31	0.036		0.02	0.104
	0.31	0.037		0.02	0.107
	0.31	0.037		0.02	0.11
	0.31	0.037		0.02	0.112
	0.31	0.036		0.03	0.119
	0.31	0.039		0.03	0.127
	0.31	0.039		0.04	0.133
	0.31	0.039		0.04	0.13
	0.31	0.039		0.04	0.127
	0.3	0.041		0.05	0.118
	0.31	0.043		0.05	0.119
	0.3	0.04		0.05	0.116
	0.31	0.037		0.05	0.112
	0.31	0.033		0.06	0.112
	0.3	0.035		0.06	0.114
	0.31	0.034		0.07	0.123
	0.3	0.029		0.07	0.131
	0.3	0.029		0.08	0.133
	0.31	0.032		0.08	0.136
	0.3	0.03		0.09	0.132
	0.31	0.03		0.09	0.129
	0.31	0.033		0.09	0.129
	0.31	0.033		0.1	0.135
	0.31	0.033		0.1	0.132
	0.31	0.035		0.11	0.135
	0.31	0.034		0.11	0.138
	0.31	0.034		0.11	0.137
	0.31	0.034		0.11	0.133
	0.31	0.038		0.11	0.13
	0.31	0.036		0.12	0.124
	0.31	0.037		0.12	0.115
	0.31	0.041		0.12	0.114
	0.31	0.044		0.13	0.115
	0.31	0.041		0.13	0.12
	0.31	0.045		0.14	0.123
	0.31	0.042		0.14	0.123
	0.31	0.043		0.14	0.116
	0.31	0.04		0.14	0.109
	0.31	0.04		0.14	0.105
	0.31	0.038		0.15	0.108
	0.31	0.035		0.15	0.114
	0.31	0.035		0.16	0.125
	0.31	0.038		0.17	0.135
	0.31	0.038		0.17	0.138
	0.31	0.035		0.17	0.142
	0.31	0.031		0.18	0.138
	0.31	0.031		0.18	0.131
	0.31	0.028		0.18	0.121
	0.31	0.031		0.18	0.111
	0.31	0.027		0.18	0.108
	0.31	0.03		0.18	0.101
	0.31	0.03		0.18	0.105
	0.31	0.034		0.18	0.1
	0.31	0.03		0.18	0.102
	0.31	0.027		0.18	0.096
	0.32	0.024		0.18	0.08
	0.32	0.024		0.17	0.065
	0.32	0.024		0.17	0.053
	0.32	0.027		0.17	0.043
	0.32	0.03		0.18	0.036
	0.32	0.039		0.18	0.038
	0.32	0.043		0.18	0.037
	0.32	0.05		0.18	0.044
	0.31	0.056		0.18	0.048
	0.31	0.063		0.18	0.051
	0.31	0.064		0.18	0.061
	0.31	0.07		0.18	0.06
	0.3	0.074		0.18	0.067
	0.3	0.081		0.18	0.067
	0.3	0.091		0.18	0.077
	0.3	0.107		0.18	0.091
	0.3	0.12		0.19	0.094
	0.29	0.126		0.19	0.104
	0.29	0.13		0.19	0.118
	0.28	0.137		0.19	0.123
	0.28	0.135		0.19	0.128
	0.27	0.135		0.19	0.132
	0.27	0.14		0.19	0.132
	0.26	0.148		0.19	0.132
	0.26	0.155		0.19	0.129
	0.26	0.166		0.19	0.127
	0.26	0.173		0.19	0.128
	0.25	0.181		0.2	0.131
	0.25	0.184		0.2	0.133
	0.24	0.184		0.2	0.128
	0.24	0.181		0.2	0.124
	0.23	0.18		0.2	0.128
	0.22	0.184		0.2	0.131
	0.22	0.194		0.21	0.126
	0.22	0.202		0.21	0.126
	0.22	0.214		0.22	0.126
	0.21	0.222		0.22	0.13
	0.21	0.219		0.22	0.137
	0.21	0.208		0.22	0.142
	0.21	0.209		0.22	0.15
	0.2	0.21		0.22	0.154
	0.19	0.202		0.23	0.16
	0.19	0.199		0.23	0.162
	0.19	0.207		0.24	0.163
	0.18	0.216		0.24	0.159
	0.18	0.217		0.24	0.156
	0.17	0.217		0.24	0.152
	0.17	0.216		0.24	0.149
	0.16	0.217		0.24	0.15
	0.15	0.209		0.25	0.149
	0.15	0.201		0.25	0.139
	0.14	0.197		0.25	0.14
	0.13	0.2		0.26	0.134
	0.13	0.211		0.26	0.132
	0.12	0.219		0.26	0.123
	0.11	0.216		0.26	0.116
	0.1	0.217		0.27	0.106
	0.1	0.22		0.27	0.101
	0.08	0.22		0.27	0.101
	0.08	0.217		0.27	0.102
	0.07	0.223		0.27	0.098
	0.07	0.216		0.27	0.091
	0.06	0.231		0.27	0.084
	0.05	0.229		0.28	0.078
	0.04	0.236		0.28	0.073
	0.03	0.237		0.28	0.078
	0.03	0.239		0.28	0.066
	0.03	0.246		0.28	0.062
	0.03	0.246		0.28	0.059
	0.03	0.244		0.28	0.057
	0.03	0.241		0.28	0.061
	0.03	0.239		0.28	0.061
	0.03	0.229		0.28	0.058
	0.03	0.211		0.28	0.061
	0.03	0.198		0.29	0.057
	0.02	0.182		0.29	0.057
	0.03	0.175		0.29	0.062
	0.02	0.158		0.29	0.065
	0.03	0.138		0.29	0.067
	0.03	0.13		0.3	0.067
	0.03	0.117		0.3	0.067
	0.03	0.107		0.3	0.07
	0.03	0.089		0.3	0.072
	0.03	0.075		0.31	0.068
	0.03	0.057		0.31	0.07
	0.02	0.045		0.31	0.063
	0.03	0.039		0.3	0.058
	0.03	0.038		0.3	0.055
	0.03	0.038		0.3	0.048
	0.03	0.035		0.3	0.045
	0.03	0.031		0.3	0.046
	0.03	0.031		0.3	0.042
	0.03	0.022		0.3	0.035
	0.03	0.03		0.3	0.03
	0.03	0.026		0.3	0.026
	0.02	0.029		0.3	0.021
	0.02	0.025		0.3	0.021
	0.02	0.028		0.3	0.016
	0.02	0.032		0.3	0.016
	0.02	0.041		0.3	0.017
	0.02	0.054		0.3	0.017
	0.01	0.061		0.3	0.017
	0.01	0.069		0.3	0.017
	0.01	0.086		0.3	0.017
	0.01	0.096		0.3	0.022
	0.01	0.113		0.3	0.018
	0.01	0.131		0.3	0.021
	0.01	0.149		0.3	0.024
	0.02	0.157		0.3	0.024
	0.02	0.173		0.3	0.024
	0.03	0.189		0.3	0.024
	0.03	0.202		0.3	0.021
	0.04	0.206		0.3	0.024
	0.04	0.209		0.3	0.021
	0.05	0.21		0.3	0.018
	0.05	0.21		0.3	0.02
	0.06	0.214		0.3	0.02
	0.07	0.216		0.3	0.023
	0.08	0.213		0.3	0.02
	0.08	0.213		0.3	0.015
	0.08	0.212		0.3	0.018
	0.08	0.214		0.3	0.018
	0.09	0.208		0.3	0.018
	0.09	0.2		0.3	0.021
	0.1	0.184		0.3	0.021
	0.11	0.174		0.3	0.024
	0.11	0.168		0.3	0.024
	0.12	0.172		0.3	0.026
	0.13	0.177		0.29	0.026
	0.13	0.179		0.3	0.029
	0.14	0.177		0.3	0.027
	0.15	0.182		0.3	0.027
	0.16	0.186		0.3	0.024
	0.17	0.182		0.3	0.027
	0.17	0.184		0.3	0.03
	0.18	0.188		0.3	0.027
	0.19	0.186		0.3	0.024
	0.2	0.189		0.3	0.02
	0.2	0.197		0.3	0.017
	0.21	0.208		0.3	0.022
	0.21	0.217		0.3	0.023
	0.22	0.22		0.3	0.023
	0.23	0.213		0.3	0.019
	0.23	0.206		0.3	0.019
	0.23	0.211		0.3	0.019
	0.23	0.218		0.3	0.021
	0.23	0.211		0.3	0.024
	0.23	0.198		0.3	0.024
	0.23	0.192		0.3	0.021
	0.24	0.184		0.3	0.018
	0.25	0.17		0.3	0.021
	0.25	0.162		0.3	0.021
	0.26	0.156		0.3	0.024
	0.26	0.151		0.3	0.028
	0.26	0.156		0.3	0.023
	0.26	0.144		0.3	0.018
	0.26	0.149		0.3	0.021
	0.26	0.146		0.3	0.021
	0.27	0.148		0.3	0.024
	0.28	0.138		0.3	0.021
	0.28	0.129		0.3	0.018
	0.29	0.128		0.3	0.015
	0.3	0.135		0.3	0.019
	0.3	0.141		0.3	0.019
	0.3	0.151		0.3	0.019
	0.31	0.167		0.3	0.015
	0.31	0.178		0.3	0.015
	0.31	0.181		0.3	0.015
	0.31	0.185		0.31	0.012
	0.31	0.176		0.3	0.016
	0.31	0.179		0.3	0.016
	0.31	0.168		0.3	0.017
	0.31	0.168		0.3	0.021
	0.31	0.158		0.3	0.021
	0.31	0.151		0.3	0.021
	0.31	0.141		0.3	0.024
	0.31	0.131		0.3	0.024
	0.31	0.122		0.3	0.021
	0.31	0.121		0.3	0.024
	0.32	0.11		0.3	0.024
	0.32	0.09		0.3	0.024
	0.32	0.073		0.3	0.027
	0.31	0.063		0.31	0.027
	0.31	0.054		0.31	0.03
	0.32	0.045		0.31	0.031
	0.32	0.038		0.31	0.035
	0.32	0.035		0.31	0.035
	0.32	0.032		0.31	0.036
	0.32	0.037		0.32	0.037
	0.32	0.037		0.32	0.037
	0.32	0.04		0.32	0.034
	0.32	0.043		0.32	0.038
	0.32	0.04		0.32	0.038
	0.32	0.033		0.32	0.038
	0.32	0.031		0.32	0.041
	0.31	0.028		0.32	0.041
	0.31	0.028		0.32	0.038
	0.31	0.03		0.32	0.039
	0.31	0.033		0.33	0.039
	0.31	0.034		0.33	0.037
	0.32	0.031		0.33	0.033
	0.31	0.037		0.33	0.033
	0.31	0.041		0.33	0.032
	0.31	0.039		0.33	0.03
	0.31	0.039		0.33	0.03
	0.31	0.036		0.33	0.03
	0.31	0.033		0.33	0.034
	0.31	0.036		0.33	0.036
	0.31	0.036		0.33	0.036
	0.31	0.037		0.33	0.033
	0.31	0.042		0.33	0.036
	0.31	0.042		0.33	0.036
	0.31	0.037		0.33	0.036
	0.31	0.03		0.33	0.033
	0.31	0.03		0.33	0.033
	0.31	0.033		0.33	0.033
	0.31	0.032		0.33	0.029
	0.31	0.032		0.33	0.026
	0.31	0.032		0.33	0.026
	0.31	0.042		0.33	0.026
	0.31	0.045		0.33	0.029
	0.31	0.057		0.33	0.023
	0.31	0.057		0.33	0.024
	0.31	0.062		0.33	0.021
	0.3	0.066		0.33	0.024
	0.3	0.065		0.33	0.024
	0.3	0.065		0.33	0.027
	0.3	0.068		0.33	0.023
	0.3	0.073		0.33	0.023
	0.31	0.075		0.33	0.019
	0.31	0.075		0.33	0.019
	0.31	0.077		0.33	0.023
	0.31	0.081		0.33	0.023
	0.31	0.096		0.33	0.023
	0.31	0.097		0.33	0.023
	0.31	0.104		0.33	0.02
	0.31	0.099		0.33	0.02
	0.32	0.1		0.33	0.019
	0.31	0.1		0.33	0.019
	0.32	0.1		0.33	0.015
	0.31	0.104		0.33	0.012
	0.32	0.1		0.33	0.009
	0.32	0.104		0.33	0.012
	0.31	0.104		0.33	0.012
	0.31	0.1		0.33	0.012
	0.31	0.097		0.33	0.017
	0.32	0.089		0.33	0.013
	0.32	0.085		0.33	0.015
	0.31	0.072		0.33	0.012
	0.32	0.063		0.33	0.017
	0.32	0.057		0.33	0.02
	0.31	0.05		0.33	0.023
	0.32	0.049		0.33	0.024
	0.31	0.048		0.33	0.034
	0.32	0.045		0.33	0.037
	0.32	0.042		0.33	0.04
	0.32	0.045		0.33	0.045
	0.32	0.045		0.33	0.041
	0.32	0.048		0.33	0.041
	0.32	0.059		0.33	0.041
	0.32	0.074		0.33	0.037
	0.31	0.085		0.33	0.04
	0.31	0.091		0.33	0.041
	0.31	0.1		0.33	0.044
	0.31	0.117		0.33	0.04
	0.31	0.122		0.33	0.037
	0.31	0.132		0.33	0.038
	0.3	0.136		0.33	0.039
	0.3	0.138		0.32	0.033
	0.29	0.145		0.32	0.033
	0.29	0.153		0.32	0.03
	0.29	0.166		0.32	0.025
	0.29	0.175		0.32	0.025
	0.29	0.188		0.32	0.025
	0.29	0.189		0.32	0.028
	0.28	0.185		0.32	0.032
	0.28	0.177		0.32	0.028
	0.28	0.178		0.32	0.025
	0.27	0.175		0.32	0.022
	0.27	0.168		0.32	0.022
	0.26	0.174		0.32	0.022
	0.26	0.179		0.32	0.02
	0.26	0.185		0.32	0.016
	0.26	0.194		0.32	0.013
	0.26	0.201		0.32	0.013
	0.25	0.197		0.32	0.016
	0.25	0.188		0.32	0.016
	0.25	0.182		0.32	0.016
	0.25	0.182		0.32	0.016
	0.25	0.185		0.32	0.017
	0.25	0.191		0.32	0.014
	0.25	0.21		0.32	0.019
	0.25	0.214		0.32	0.019
	0.25	0.219		0.32	0.023
	0.25	0.216		0.32	0.023
	0.25	0.215		0.32	0.023
	0.25	0.207		0.32	0.023
	0.24	0.212		0.32	0.023
	0.24	0.205		0.32	0.026
	0.23	0.202		0.32	0.026
	0.23	0.206		0.32	0.022
	0.23	0.207		0.32	0.022
	0.22	0.201		0.32	0.027
	0.22	0.189		0.32	0.03
	0.22	0.18		0.32	0.026
	0.21	0.177		0.32	0.033
	0.21	0.16		0.32	0.028
	0.21	0.158		0.33	0.033
	0.21	0.146		0.33	0.031
	0.2	0.144		0.33	0.034
	0.2	0.138		0.33	0.034
	0.2	0.134		0.33	0.034
	0.2	0.126		0.33	0.038
	0.2	0.128		0.33	0.036
	0.19	0.121		0.33	0.033
	0.18	0.112		0.33	0.036
	0.18	0.107		0.32	0.039
	0.17	0.107		0.33	0.035
	0.17	0.11		0.32	0.038
	0.16	0.113		0.32	0.038
	0.16	0.113		0.32	0.034
	0.16	0.117		0.32	0.034
	0.15	0.118		0.32	0.03
	0.15	0.131		0.32	0.031
	0.14	0.137		0.32	0.028
	0.14	0.137		0.32	0.028
	0.14	0.137		0.32	0.024
	0.14	0.134		0.32	0.023
	0.13	0.129		0.32	0.023
	0.13	0.129		0.32	0.023
	0.14	0.127		0.32	0.02
	0.13	0.125		0.32	0.017
	0.13	0.124		0.32	0.017
	0.13	0.114		0.33	0.01
	0.13	0.107		0.32	0.01
	0.14	0.101		0.32	0.01
	0.13	0.091		0.32	0.013
	0.13	0.08		0.32	0.013
	0.12	0.064		0.32	0.01
	0.12	0.054		0.32	0.012
	0.11	0.053		0.32	0.015
	0.11	0.055		0.32	0.018
	0.1	0.061		0.32	0.018
	0.1	0.069		0.32	0.023
	0.09	0.081		0.32	0.026
	0.08	0.094		0.32	0.031
	0.08	0.101		0.32	0.034
	0.08	0.102		0.33	0.034
	0.07	0.113		0.33	0.037
	0.06	0.122		0.33	0.037
	0.06	0.128		0.33	0.037
	0.05	0.142		0.33	0.037
	0.05	0.15		0.33	0.037
	0.04	0.163		0.33	0.042
	0.04	0.176		0.33	0.04
	0.04	0.179		0.33	0.04
	0.04	0.179		0.33	0.04
	0.04	0.173		0.33	0.04
	0.04	0.173		0.32	0.04
	0.03	0.157		0.32	0.039
	0.04	0.14		0.32	0.042
	0.03	0.137		0.32	0.049
	0.03	0.136		0.32	0.054
	0.03	0.129		0.32	0.057
	0.03	0.119		0.32	0.064
	0.03	0.109		0.32	0.065
	0.03	0.096		0.32	0.072
	0.03	0.088		0.32	0.08
	0.03	0.078		0.32	0.082
	0.03	0.062		0.32	0.089
	0.03	0.056		0.32	0.088
	0.03	0.052		0.32	0.092
	0.03	0.049		0.32	0.095
	0.03	0.036		0.32	0.095
	0.03	0.035		0.32	0.092
	0.03	0.035		0.32	0.092
	0.03	0.035		0.32	0.088
	0.03	0.034		0.32	0.087
	0.03	0.031		0.32	0.084
	0.03	0.028		0.32	0.082
[truncated: 14,442 more rows]

## Sheet: Fig 7F
Latency to shelter
	GFP 6 Hz	ChR2 6 Hz	GFP 20 Hz	ChR2 20 Hz
	47	4.3	23.2	3.04
	63.6	50.5	47.2	8.96
	31.2	25.9	61.6	20
	28.1	12.8	37.5	11
	59.8	20	60.8	16
	19.2	15.5	63.2	9
	132.1	13.3	63.7	4
	24.6	30	42.2	18
	32.2	8.8		4
	120	26.6		5.62
	92.2	42.4
	150	13.2
	70.8	19.1
	41.1	3.71
	91.8	15
	42.2	4.4
	64.4	30.5
	68.8	46.2
	63.7
	38.3

## Sheet: Fig 7H
GFP 6 Hz					ChR2 6 Hz
Distance to Shelter	Speed	Light ON				Distance to Shelter	Speed	Light ON
								0
	0.054	0						0
	0.055	0						0
0.01	0.061	0						0
0.02	0.071	0				0.26		0
0.02	0.079	0				0.26		0
0.02	0.079	0				0.26		0
0.02	0.082	0				0.26		0
0.03	0.088	0				0.26		0
0.03	0.09	0				0.26		0
0.03	0.101	0				0.26		0
0.03	0.107	0				0.26		0
0.03	0.112	0				0.26		0
0.03	0.107	0				0.26		0
0.04	0.108	0				0.26		0
0.04	0.108	0				0.26		0
0.04	0.108	0				0.26	0.052	0
0.04	0.112	0				0.26	0.051	0
0.04	0.117	0				0.26	0.047	0
0.04	0.116	0				0.26	0.041	0
0.04	0.108	0				0.26	0.041	0
0.04	0.096	0				0.26	0.038	0
0.03	0.092	0				0.26	0.041	0
0.03	0.083	0				0.26	0.05	0
0.04	0.076	0				0.26	0.056	0
0.04	0.069	0				0.26	0.057	0
0.04	0.063	0				0.26	0.062	0
0.04	0.058	0				0.26	0.065	0
0.05	0.06	0				0.26	0.069	0
0.05	0.052	0				0.26	0.077	0
0.05	0.049	0				0.26	0.081	0
0.05	0.045	0				0.26	0.084	0
0.04	0.037	0				0.18	0.087	0
0.05	0.029	0				0.18	0.09	0
0.05	0.019	0				0.18	0.1	0
0.05	0.017	0				0.18	0.105	0
0.04	0.021	0				0.18	0.112	0
0.04	0.021	0				0.18	0.115	0
0.04	0.021	0				0.18	0.113	0
0.05	0.024	0				0.18	0.117	0
0.04	0.024	0				0.18	0.122	0
0.04	0.024	0				0.18	0.127	0
0.04	0.024	0				0.18	0.125	0
0.04	0.019	0				0.18	0.124	0
0.04	0.019	0				0.18	0.116	0
0.05	0.019	0				0.16	0.113	0
0.05	0.019	0				0.16	0.11	0
0.04	0.019	0				0.16	0.111	0
0.04	0.023	0				0.16	0.108	0
0.04	0.026	0				0.16	0.1	0
0.04	0.026	0				0.16	0.097	0
0.04	0.023	0				0.16	0.096	0
0.04	0.019	0				0.16	0.089	0
0.04	0.019	0				0.16	0.085	0
0.04	0.019	0				0.16	0.072	0
0.04	0.018	0				0.16	0.069	0
0.04	0.018	0				0.16	0.059	0
0.04	0.022	0				0.16	0.059	0
0.05	0.022	0				0.16	0.056	0
0.04	0.025	0				0.16	0.057	0
0.05	0.028	0				0.16	0.057	0
0.05	0.031	0				0.16	0.058	0
0.05	0.034	0				0.16	0.056	0
0.05	0.031	0				0.16	0.056	0
0.04	0.028	0				0.16	0.054	0
0.05	0.025	0				0.17	0.067	0
0.05	0.025	0				0.17	0.064	0
0.04	0.028	0				0.17	0.064	0
0.04	0.028	0				0.17	0.065	0
0.04	0.026	0				0.17	0.068	0
0.04	0.023	0				0.17	0.061	0
0.05	0.019	0				0.17	0.068	0
0.04	0.021	0				0.17	0.069	0
0.04	0.024	0				0.17	0.065	0
0.04	0.02	0				0.17	0.064	0
0.04	0.02	0				0.17	0.061	0
0.04	0.021	0				0.17	0.057	0
0.05	0.022	0				0.17	0.059	0
0.05	0.025	0				0.17	0.059	0
0.05	0.025	0				0.17	0.057	0
0.05	0.025	0				0.17	0.043	0
0.04	0.028	0				0.17	0.043	0
0.04	0.025	0				0.17	0.04	0
0.04	0.028	0				0.17	0.039	0
0.04	0.028	0				0.17	0.036	0
0.04	0.031	0				0.17	0.04	0
0.04	0.031	0				0.17	0.033	0
0.04	0.03	0				0.17	0.032	0
0.04	0.026	0				0.17	0.032	0
0.04	0.029	0				0.16	0.028	0
0.04	0.029	0				0.16	0.028	0
0.04	0.029	0				0.16	0.033	0
0.04	0.03	0				0.16	0.028	0
0.04	0.029	0				0.16	0.028	0
0.04	0.029	0				0.16	0.028	0
0.04	0.029	0				0.16	0.035	0
0.04	0.029	0				0.16	0.037	0
0.04	0.033	0				0.15	0.039	0
0.04	0.029	0				0.15	0.039	0
0.04	0.033	0				0.15	0.042	0
0.04	0.034	0				0.15	0.041	0
0.04	0.034	0				0.15	0.045	0
0.04	0.03	0				0.14	0.047	0
0.04	0.035	0				0.14	0.05	0
0.04	0.035	0				0.14	0.05	0
0.04	0.032	0				0.14	0.05	0
0.04	0.029	0				0.14	0.049	0
0.04	0.027	0				0.14	0.051	0
0.04	0.024	0				0.14	0.051	0
0.04	0.024	0				0.14	0.048	0
0.04	0.029	0				0.14	0.041	0
0.04	0.026	0				0.14	0.039	0
0.04	0.026	0				0.14	0.04	0
0.04	0.034	0				0.15	0.04	0
0.04	0.034	0				0.15	0.04	0
0.04	0.031	0				0.15	0.042	0
0.04	0.038	0				0.16	0.037	0
0.04	0.042	0				0.16	0.036	0
0	0.04	0				0.16	0.036	0
0.01	0.04	0				0.17	0.039	0
0.01	0.044	0				0.17	0.043	0
0.01	0.047	0				0.17	0.043	0
0.01	0.047	0				0.17	0.041	0
0.01	0.047	0				0.17	0.038	0
0.01	0.047	0				0.17	0.041	0
0.01	0.045	0				0.17	0.043	0
0.01	0.045	0				0.17	0.04	0
0.01	0.042	0				0.16	0.038	0
0.01	0.036	0				0.16	0.035	0
0.01	0.033	0				0.16	0.035	0
0.01	0.036	0				0.16	0.034	0
0.01	0.034	0				0.16	0.037	0
0.01	0.034	0				0.16	0.034	0
0.01	0.03	0				0.16	0.031	0
0.01	0.03	0				0.16	0.031	0
0.01	0.027	0				0.16	0.029	0
0.01	0.026	0				0.16	0.029	0
0.01	0.023	0				0.16	0.032	0
0.01	0.026	0				0.16	0.04	0
0.01	0.026	0				0.15	0.04	0
0.01	0.028	0				0.15	0.042	0
0.01	0.031	0				0.14	0.047	0
0.01	0.035	0				0.14	0.048	0
0.01	0.035	0				0.14	0.053	0
0.01	0.035	0				0.14	0.056	0
0.01	0.035	0				0.13	0.056	0
0.01	0.033	0				0.13	0.059	0
0.01	0.034	0				0.13	0.066	0
0.01	0.034	0				0.13	0.066	0
0.01	0.031	0				0.13	0.07	0
0.01	0.031	0				0.13	0.067	0
0.01	0.029	0				0.13	0.063	0
0.01	0.032	0				0.13	0.064	0
0.01	0.029	0				0.13	0.056	0
0.01	0.029	0				0.13	0.056	0
0.01	0.024	0				0.13	0.049	0
0.01	0.023	0				0.13	0.048	0
0.01	0.022	0				0.13	0.044	0
0.01	0.019	0				0.13	0.04	0
0.01	0.019	0				0.13	0.037	0
0.01	0.019	0				0.13	0.037	0
0.01	0.02	0				0.13	0.03	0
0.01	0.018	0				0.13	0.026	0
0.01	0.018	0				0.13	0.033	0
0.01	0.018	0				0.13	0.029	0
0.01	0.018	0				0.13	0.034	0
0.01	0.02	0				0.13	0.041	0
0.01	0.02	0				0.13	0.047	0
0.01	0.024	0				0.13	0.052	0
0.01	0.027	0				0.13	0.049	0
0.01	0.027	0				0.13	0.052	0
0.01	0.025	0				0.13	0.054	0
0.01	0.021	0				0.12	0.06	0
0.01	0.021	0				0.12	0.063	0
0.01	0.021	0				0.12	0.063	0
0.01	0.018	0				0.12	0.06	0
0.01	0.015	0				0.12	0.065	0
0.01	0.012	0				0.12	0.061	0
0.01	0.012	0				0.12	0.055	0
0.01	0.016	0				0.12	0.055	0
0.01	0.016	0				0.12	0.053	0
0.01	0.019	0				0.12	0.046	0
0.01	0.015	0				0.12	0.04	0
0.01	0.016	0				0.12	0.035	0
0.01	0.012	0				0.12	0.038	0
0.01	0.015	0				0.12	0.04	0
0.01	0.015	0				0.12	0.035	0
0.01	0.015	0				0.12	0.032	0
0.01	0.015	0				0.12	0.031	0
0.01	0.015	0				0.12	0.031	0
0.01	0.019	0				0.12	0.035	0
0.01	0.022	0				0.12	0.034	0
0.01	0.025	0				0.12	0.037	0
0.01	0.025	0				0.12	0.037	0
0.01	0.028	0				0.12	0.034	0
0.01	0.031	0				0.12	0.034	0
0	0.03	0				0.12	0.034	0
0.01	0.032	0				0.12	0.034	0
0	0.029	0				0.12	0.037	0
	0.029	0				0.13	0.034	0
	0.029	0				0.13	0.029	0
0	0.029	0				0.13	0.029	0
0.01	0.029	0				0.13	0.026	0
0	0.029	0				0.13	0.029	0
0	0.032	0				0.13	0.035	0
0	0.032	0				0.13	0.04	0
0	0.029	0				0.13	0.047	0
0	0.025	0				0.13	0.053	0
0	0.025	0				0.13	0.058	0
0.01	0.018	0				0.15	0.06	0
0.01	0.015	0				0.15	0.06	0
0.01	0.012	0				0.15	0.064	0
0	0.013	0				0.15	0.066	0
0.01	0.013	0				0.14	0.071	0
0.01	0.013	0				0.14	0.076	0
0.01	0.013	0				0.14	0.083	0
0.01	0.013	0				0.13	0.093	0
0.01	0.015	0				0.13	0.103	0
0.01	0.015	0				0.13	0.114	0
0.01	0.015	0				0.12	0.116	0
0.01	0.015	0				0.12	0.126	0
0.01	0.015	0				0.1	0.133	0
0.01	0.018	0				0.1	0.136	0
0.01	0.018	0				0.1	0.145	0
0.01	0.023	0				0.1	0.166	0
0.01	0.026	0				0.09	0.185	0
0.01	0.026	0				0.09	0.208	0
0.01	0.023	0				0.08	0.235	0
0.01	0.023	0				0.07	0.252	0
0.01	0.026	0				0.07	0.263	0
0.01	0.026	0				0.07	0.276	0
0.01	0.026	0				0.05	0.294	0
0.01	0.027	0				0.05	0.306	0
0.01	0.027	0				0.05	0.327	0
0	0.024	0				0.05	0.333	0
0.01	0.021	0				0.03	0.327	0
0.01	0.024	0				0.02	0.327	0
0.01	0.021	0				0.02	0.33	0
0.01	0.021	0				0.02	0.326	0
0.01	0.019	0				0.02	0.306	0
0.01	0.019	0				0.02	0.286	0
0.01	0.019	0				0.01	0.264	0
0.01	0.019	0				0.01	0.236	0
0.01	0.023	0				0	0.217	0
0.01	0.019	0					0.204	0
0.01	0.019	0					0.189	0
0.01	0.023	0					0.169	0
0.01	0.024	0					0.152	0
0.01	0.034	0					0.12	0
0.01	0.051	0					0.106	0
0.01	0.06	0					0.096	0
0.01	0.064	0					0.084	0
0.01	0.068	0					0.078	0
0.01	0.072	0					0.075	0
0.01	0.072	0					0.079	0
0.01	0.072	0					0.079	0
0.01	0.079	0					0.076	0
0.01	0.082	0					0.071	0
0.01	0.079	0					0.07	0
0.01	0.082	0					0.063	0
0.01	0.079	0					0.06	0
0.01	0.076	0					0.058	0
0.02	0.071	0					0.05	0
0.02	0.061	0					0.046	0
0.02	0.044	0					0.044	0
0.02	0.035	0					0.043	0
0.02	0.028	0					0.046	0
0.02	0.023	0					0.053	0
0.02	0.022	0					0.049	0
0.02	0.019	0					0.05	0
0.02	0.016	0					0.05	0
0.02	0.012	0					0.056	0
0.02	0.009	0					0.06	0
0.02	0.012	0					0.064	0
0.02	0.012	0					0.073	0
0.02	0.015	0					0.083	0
0.02	0.02	0					0.081	0
0.02	0.02	0					0.084	0
0.02	0.022	0					0.086	0
0.02	0.026	0					0.083	0
0.02	0.026	0					0.083	0
0.01	0.031	0					0.079	0
0.01	0.038	0					0.072	0
0	0.043	0					0.07	0
	0	0					0.068	0
	0	0					0.062	0
	0	0					0.059	0
	0	0					0.056	0
	0	0					0.052	0
	0	0					0.042	0
	0	0					0.035	0
	0	0					0.035	0
	0	0					0.032	0
	0	0					0.033	0
	0	0					0.036	0
	0	0					0.033	0
	0	0					0.033	0
	0	0					0.032	0
	0	0					0.028	0
	0	0					0.026	0
0.01	0.068	0					0.025	0
0.01	0.06	0					0.025	0
0.01	0.053	0					0.028	0
0	0.048	0					0.028	0
0	0.044	0					0.028	0
	0	0					0.029	0
	0	0					0.029	0
	0	0					0.032	0
	0	0					0.029	0
	0	0					0.026	0
	0	0					0.026	0
	0	0					0.023	0
	0	0					0.021	0
	0	0					0.021	0
	0	0					0.017	0
	0	0					0.017	0
	0	0					0.014	0
	0	0					0.011	0
	0	0					0.011	0
	0	0					0.015	0
	0	0					0.014	0
	0	0					0.017	0
	0	0					0.017	0
	0	0					0.022	0
	0	0					0.022	0
	0	0					0.027	0
	0	0					0.03	0
	0	0					0.03	0
	0	0					0.032	0
	0	0					0.032	0
	0	0					0.032	0
	0	0					0.035	0
	0	0					0.035	0
	0	0					0.035	0
	0	0					0.034	0
	0	0					0.031	0
	0	0					0.029	0
	0	0					0.073	0
	0	0					0.099	0
	0	0					0.104	0
	0	0					0.106	0
	0	0					0.11	0
	0	0					0.114	0
	0	0					0.115	0
	0	0					0.118	0
	0	0					0.124	0
	0	0					0.125	0
	0	0					0.131	0
	0	0					0.131	0
	0	0					0.132	0
	0	0					0.138	0
	0	0					0.14	0
	0	0					0.1	0
	0	0					0.073	0
	0	0					0.071	0
	0	0					0.067	0
	0	0					0.063	0
	0	0					0.063	0
	0	0					0.06	0
	0	0					0.061	0
	0	0					0.062	0
	0	0					0.062	0
	0	0					0.059	0
	0	0					0.056	0
	0	0					0.053	0
	0	0					0.047	0
	0	0					0.05	0
	0	0					0.053	0
	0	0					0.053	0
	0	0					0.061	0
	0	0					0.062	0
	0	0					0.062	0
	0	0					0.059	0
	0	0					0.063	0
	0	0					0.064	0
	0	0					0.061	0
	0	0					0.065	0
	0	0					0.069	0
	0	0					0.076	0
	0	0					0.078	0
	0	0					0.082	0
	0	0					0.08	0
	0	0					0.077	0
	0	0					0.073	0
	0	0					0.069	0
	0	0					0.067	0
	0	0					0.069	0
	0	0					0.073	0
	0	0					0.076	0
	0	0					0.074	0
	0	0					0.073	0
	0	0					0.069	0
	0	0					0.065	0
	0	0					0.062	0
	0	0					0.058	0
	0	0					0.058	0
	0	0					0.056	0
	0	0					0.057	0
	0	0					0.057	0
	0	0					0.057	0
	0	0					0.057	0
	0.052	0					0.057	0
	0.049	0					0.056	0
	0.052	0					0.052	0
	0.053	0					0.052	0
0.02	0.051	0					0.052	0
0.02	0.049	0					0.049	0
0.02	0.05	0					0.049	0
0.02	0.047	0					0.047	0
0.02	0.047	0					0.047	0
0.03	0.046	0					0.044	0
0.03	0.047	0					0.041	0
0.03	0.051	0					0.034	0
0.03	0.055	0					0.034	0
0.03	0.058	0					0.027	0
0.03	0.063	0					0.024	0
0.03	0.067	0					0.019	0
0.03	0.077	0					0.016	0
0.03	0.08	0					0.013	0
0.03	0.084	0					0.01	0
0.03	0.079	0					0.006	0
0.03	0.075	0					0.006	0
0.03	0.07	0					0.003	0
0.03	0.074	0					0.003	0
0.02	0.075	0					0.003	0
0.02	0.072	0					0.003	0
0.02	0.071	0					0.006	0
0.02	0.063	0					0.01	0
0.03	0.059	0					0.013	0
0.02	0.055	0					0.016	0
0.02	0.051	0					0.019	0
0.02	0.051	0					0.024	0
0.02	0.046	0					0.027	0
0.01	0.04	0					0.03	0
0.02	0.036	0					0.03	0
0.01	0.043	0					0.034	0
0.01	0.047	0					0.037	0
0.01	0.047	0					0.037	0
	0.048	0					0.037	0
	0.047	0					0.04	0
	0.05	0					0.043	0
	0.05	0					0.04	0
	0.057	0					0.037	0
	0.054	0					0.034	0
	0.051	0					0.031	0
	0.051	0					0.029	0
	0.051	0					0.025	0
	0.046	0					0.025	0
	0.051	0					0.022	0
	0.051	0					0.022	0
	0.043	0					0.022	0
	0.04	0					0.019	0
	0.044	0					0.022	0
	0.043	0					0.023	0
	0.05	0					0.023	0
	0.05	0					0.02	0
	0.05	0					0.023	0
	0.046	0					0.027	0
	0.05	0					0.031	0
0	0.053	0					0.034	0
0	0.05	0					0.045	0
0	0.046	0					0.05	0
0	0.049	0					0.047	0
0	0.048	0					0.05	0
0	0.048	0					0.053	0
	0.048	0				0.01	0.053	0
	0.052	0				0.01	0.056	0
	0.055	0				0.01	0.053	0
0.01	0.068	0				0.01	0.052	0
0.02	0.069	0				0.01	0.053	0
0.02	0.075	0				0.01	0.056	0
0.03	0.081	0				0.01	0.056	0
0.03	0.081	0				0.01	0.057	0
0.03	0.079	0				0.01	0.059	0
0.02	0.076	0				0.01	0.066	0
0.02	0.079	0				0.01	0.066	0
0.02	0.083	0				0.04	0.059	0
0.02	0.083	0				0.04	0.065	0
0.01	0.083	0				0.04	0.071	0
0.01	0.079	0				0.04	0.077	0
0.01	0.082	0				0.05	0.082	0
0	0.083	0				0.05	0.088	0
	0	0				0.06	0.089	0
	0	0				0.06	0.096	0
	0	0				0.07	0.102	0
	0	0				0.07	0.11	0
	0	0				0.07	0.117	0
	0	0				0.08	0.126	0
	0	0				0.08	0.126	0
	0	0				0.09	0.128	0
	0	0				0.09	0.135	0
	0	0				0.09	0.139	0
	0	0				0.1	0.135	0
	0	0				0.11	0.142	0
	0	0				0.11	0.143	0
	0	0				0.12	0.152	0
	0	0				0.13	0.158	0
	0	0				0.14	0.168	0
	0	0				0.14	0.171	0
	0	0				0.15	0.172	0
	0	0				0.15	0.173	0
	0	0				0.16	0.173	0
	0	0				0.16	0.167	0
0	0	0				0.16	0.168	0
0	0	0				0.16	0.155	0
0	0	0				0.16	0.145	0
	0	0				0.16	0.142	0
	0	0				0.16	0.139	0
	0	0				0.16	0.129	0
	0	0				0.16	0.119	0
	0	0				0.16	0.103	0
	0	0				0.16	0.09	0
	0	0				0.16	0.075	0
	0	0				0.16	0.069	0
	0	0				0.16	0.062	0
	0	0				0.17	0.051	0
	0	0				0.17	0.047	0
	0	0				0.17	0.05	0
	0	0				0.18	0.056	0
	0	0				0.19	0.069	0
	0	0				0.19	0.079	0
	0	0				0.2	0.085	0
	0	0				0.2	0.088	0
	0	0				0.21	0.092	0
	0	0				0.21	0.109	0
	0	0				0.21	0.116	0
	0	0				0.22	0.122	0
	0	0				0.23	0.132	0
	0	0				0.23	0.136	0
	0	0				0.23	0.145	0
	0	0				0.24	0.153	0
	0	0				0.24	0.153	0
	0	0				0.24	0.15	0
	0	0				0.24	0.14	0
	0	0				0.25	0.13	0
	0	0				0.25	0.126	0
	0	0				0.25	0.113	0
	0	0				0.25	0.114	0
	0	0				0.25	0.107	0
	0	0				0.25	0.093	0
	0	0				0.25	0.086	0
	0	0				0.25	0.08	0
	0	0				0.25	0.071	0
	0	0				0.25	0.067	0
	0	0				0.25	0.057	0
	0	0				0.24	0.046	0
	0	0				0.25	0.04	0
	0	0				0.24	0.036	0
	0	0				0.24	0.036	0
	0	0				0.24	0.038	0
	0	0				0.24	0.035	0
	0	0				0.24	0.038	0
	0	0				0.24	0.03	0
	0	0				0.24	0.033	0
	0	0				0.24	0.029	0
	0	0				0.24	0.032	0
	0	0				0.24	0.033	0
	0	0				0.24	0.037	0
	0	0				0.24	0.034	0
	0	0				0.24	0.034	0
	0	0				0.24	0.037	0
	0	0				0.24	0.037	0
	0	0				0.24	0.037	0
	0	0				0.24	0.034	0
	0	0				0.24	0.029	0
	0	0				0.24	0.03	0
	0	0				0.24	0.026	0
	0	0				0.24	0.03	0
	0	0				0.24	0.03	0
	0	0				0.24	0.035	0
	0	0				0.24	0.036	0
	0	0				0.24	0.036	0
	0	0				0.24	0.035	0
	0	0				0.24	0.037	0
	0	0				0.24	0.037	0
	0	0				0.24	0.038	0
	0	0				0.25	0.038	0
	0	0				0.25	0.038	0
	0	0				0.25	0.043	0
	0	0				0.25	0.046	0
	0	0				0.25	0.043	0
	0	0				0.25	0.048	0
	0	0				0.25	0.048	0
	0	0				0.25	0.047	0
	0	0				0.25	0.045	0
	0	0				0.25	0.044	0
	0	0				0.25	0.044	0
	0	0				0.25	0.044	0
	0	0				0.25	0.042	0
	0	0				0.25	0.038	0
	0	0				0.25	0.037	0
	0	0				0.25	0.04	0
	0	0				0.25	0.037	0
	0	0				0.25	0.033	0
	0	0				0.25	0.029	0
	0	0				0.25	0.033	0
	0	0				0.25	0.031	0
	0	0				0.25	0.031	0
	0	0				0.25	0.029	0
	0	0				0.25	0.029	0
	0	0				0.25	0.026	0
	0	0				0.25	0.023	0
	0	0				0.25	0.019	0
	0	0				0.25	0.019	0
	0	0				0.25	0.019	0
	0	0				0.25	0.016	0
	0	0				0.25	0.013	0
	0	0				0.25	0.013	0
	0	0				0.25	0.013	0
	0	0				0.25	0.013	0
	0	0				0.25	0.01	0
	0	0				0.25	0.006	0
	0	0				0.25	0.003	0
	0	0				0.25	0.003	0
	0	0				0.25	0	0
	0	0				0.25	0	0
	0	0				0.25	0	0
	0	0				0.25	0	0
	0	0				0.25	0	0
	0	0				0.25	0	0
	0	0				0.25	0	0
	0	0				0.25	0	0
	0	0				0.25	0	0
	0	0				0.25	0	0
	0	0				0.25	0	0
	0	0				0.25	0	0
	0	0				0.25	0	0
	0	0				0.25	0	0
	0	0				0.24	0	0
	0	0				0.24	0	0
	0	0				0.25	0	0
	0	0				0.25	0	0
	0	0				0.25	0	0
	0	0				0.25	0	0
	0	0				0.25	0	0
	0	0				0.25	0	0
	0	0				0.25	0.003	0
	0	0				0.25	0.003	0
	0	0				0.25	0.003	0
	0	0				0.25	0.008	0
	0	0				0.25	0.008	0
	0	0				0.25	0.015	0
	0	0				0.25	0.018	0
	0	0				0.25	0.025	0
	0	0				0.25	0.032	0
	0	0				0.25	0.039	0
	0	0				0.25	0.046	0
	0	0				0.25	0.056	0
	0	0				0.25	0.066	0
	0	0				0.25	0.079	0
	0	0				0.25	0.089	0
	0	0				0.25	0.095	0
	0	0				0.25	0.098	0
	0	0				0.25	0.103	0
	0	0				0.25	0.105	0
	0	0				0.25	0.112	0
	0	0				0.25	0.117	0
0	0	0				0.26	0.124	0
0	0.04	0				0.26	0.13	0
0	0.044	0				0.26	0.138	0
0	0.039	0				0.26	0.147	0
0	0.039	0				0.27	0.153	0
0.01	0.04	0				0.27	0.156	0
0.01	0.045	0				0.27	0.162	0
0.01	0.041	0				0.27	0.16	0
0.01	0.038	0				0.28	0.157	0
0.01	0.031	0				0.28	0.156	0
0.01	0.028	0				0.28	0.163	0
0.01	0.028	0				0.29	0.17	0
0.01	0.025	0				0.29	0.173	0
0.01	0.025	0				0.29	0.173	0
0.01	0.017	0				0.3	0.174	0
0.01	0.014	0				0.3	0.171	0
0.01	0.017	0				0.3	0.165	0
0	0.014	0				0.3	0.159	0
0.01	0.014	0				0.3	0.147	0
0.01	0.011	0				0.3	0.141	0
0.01	0.008	0				0.3	0.137	0
0.01	0.003	0				0.3	0.128	0
0.01	0.003	0				0.3	0.124	0
0.01	0.003	0				0.3	0.124	0
0.01	0.003	0				0.3	0.121	0
0.01	0.006	0				0.3	0.121	0
0.01	0.01	0				0.3	0.119	0
0.01	0.01	0				0.31	0.119	0
0	0.013	0				0.31	0.119	0
0	0.013	0				0.31	0.113	0
0	0.013	0				0.31	0.109	0
	0	0				0.31	0.105	0
	0	0				0.31	0.105	1
	0	0				0.31	0.101	1
	0	0				0.31	0.1	1
	0	0				0.31	0.099	1
	0	0				0.31	0.095	1
	0	0				0.31	0.091	1
	0	0				0.31	0.086	1
	0	0				0.31	0.082	1
	0	0				0.31	0.083	1
	0	0				0.31	0.074	1
0.01	0	0				0.31	0.068	1
0.01	0	0				0.3	0.061	1
0.01	0	0				0.3	0.054	1
0.01	0	0				0.3	0.051	1
0.01	0	0				0.3	0.051	1
0.01	0.052	0				0.3	0.053	1
0.02	0.059	0				0.3	0.049	1
0.02	0.063	0				0.29	0.051	1
0.02	0.066	0				0.29	0.046	1
0.02	0.069	0				0.29	0.042	1
0.02	0.075	0				0.29	0.042	1
0.02	0.079	0				0.29	0.043	1
0.03	0.093	0				0.29	0.046	1
0.03	0.096	0				0.29	0.045	1
0.03	0.1	0				0.28	0.05	1
0.03	0.107	0				0.28	0.05	1
0.03	0.11	0				0.28	0.051	1
0.03	0.117	0				0.28	0.054	1
0.03	0.123	0				0.28	0.052	1
0.03	0.125	0				0.28	0.053	1
0.03	0.118	0				0.28	0.052	1
0.03	0.115	0				0.28	0.061	1
0.03	0.119	0				0.28	0.061	1
0.03	0.123	0				0.28	0.062	1
0.03	0.126	0				0.27	0.065	1
0.03	0.127	0				0.27	0.062	1
0.03	0.126	0				0.27	0.061	1
0.03	0.122	0				0.27	0.061	1
0.03	0.124	0				0.27	0.057	1
0.05	0.123	0				0.26	0.057	1
0.05	0.122	0				0.26	0.061	1
0.05	0.12	0				0.26	0.063	1
0.05	0.118	0				0.25	0.065	1
0.05	0.117	0				0.25	0.062	1
0.07	0.115	0				0.25	0.061	1
0.07	0.121	0				0.25	0.058	1
0.07	0.118	0				0.25	0.049	1
0.07	0.117	0				0.25	0.044	1
0.07	0.112	0				0.25	0.045	1
0.08	0.113	0				0.25	0.042	1
0.08	0.11	0				0.25	0.042	1
0.08	0.106	0				0.25	0.039	1
0.09	0.111	0				0.25	0.034	1
0.09	0.106	0				0.25	0.031	1
0.1	0.104	0				0.25	0.027	1
0.1	0.102	0				0.25	0.019	1
0.1	0.105	0				0.25	0.015	1
0.1	0.108	0				0.25	0.011	1
0.1	0.109	0				0.25	0.011	1
0.12	0.111	0				0.25	0.008	1
0.12	0.108	0				0.25	0.011	1
0.12	0.103	0				0.25	0.014	1
0.12	0.109	0				0.25	0.014	1
0.13	0.112	0				0.25	0.013	1
0.13	0.112	0				0.25	0.015	1
0.14	0.112	0				0.26	0.015	1
0.14	0.112	0				0.26	0.018	1
0.14	0.1	0				0.26	0.021	1
0.14	0.102	0				0.26	0.024	1
0.15	0.107	0				0.26	0.024	1
0.15	0.11	0				0.26	0.024	1
0.15	0.106	0				0.26	0.024	1
0.15	0.102	0				0.26	0.024	1
0.16	0.097	0				0.26	0.024	1
0.16	0.097	0				0.26	0.024	1
0.16	0.1	0				0.26	0.024	1
0.17	0.106	0				0.26	0.021	1
0.17	0.102	0				0.26	0.021	1
0.18	0.102	0				0.25	0.017	1
0.18	0.095	0				0.26	0.015	1
0.17	0.093	0				0.26	0.015	1
0.17	0.093	0				0.26	0.012	1
0.17	0.093	0				0.26	0.013	1
0.17	0.094	0				0.26	0.01	1
0.17	0.087	0				0.26	0.01	1
0.16	0.08	0				0.26	0.01	1
0.16	0.08	0				0.26	0.01	1
0.16	0.074	0				0.26	0.01	1
0.16	0.073	0				0.26	0.01	1
0.16	0.068	0				0.26	0.01	1
0.16	0.062	0				0.26	0.011	1
0.16	0.057	0				0.26	0.014	1
0.16	0.052	0				0.26	0.017	1
0.16	0.048	0				0.26	0.017	1
0.16	0.052	0				0.26	0.017	1
0.16	0.056	0				0.25	0.017	1
0.16	0.063	0				0.25	0.021	1
0.16	0.07	0				0.26	0.021	1
0.19	0.073	0				0.25	0.023	1
0.19	0.079	0				0.25	0.023	1
0.19	0.085	0				0.25	0.023	1
0.19	0.088	0				0.25	0.02	1
0.19	0.094	0				0.25	0.023	1
0.21	0.104	0				0.25	0.026	1
0.21	0.108	0				0.26	0.029	1
0.21	0.112	0				0.25	0.03	1
0.22	0.117	0				0.25	0.026	1
0.22	0.123	0				0.26	0.028	1
0.23	0.13	0				0.26	0.028	1
0.23	0.134	0				0.26	0.028	1
0.23	0.132	0				0.26	0.028	1
0.23	0.129	0				0.26	0.028	1
0.23	0.133	0				0.26	0.028	1
0.23	0.133	0				0.26	0.026	1
0.23	0.133	0				0.26	0.026	1
0.23	0.131	0				0.26	0.029	1
0.23	0.132	0				0.25	0.032	1
0.27	0.139	0				0.26	0.032	1
0.28	0.139	0				0.26	0.032	1
0.28	0.139	0				0.26	0.029	1
0.28	0.141	0				0.25	0.027	1
0.28	0.139	0				0.25	0.034	1
0.28	0.136	0				0.25	0.033	1
0.28	0.129	0				0.25	0.04	1
0.28	0.119	0				0.25	0.047	1
0.28	0.117	0				0.25	0.062	1
0.28	0.11	0				0.24	0.069	1
0.28	0.096	0				0.24	0.081	1
0.28	0.086	0				0.24	0.094	1
0.28	0.08	0				0.22	0.114	1
0.28	0.079	0				0.22	0.129	1
0.28	0.074	0				0.21	0.136	1
0.28	0.063	0				0.21	0.14	1
0.28	0.05	0				0.21	0.145	1
0.27	0.046	0				0.21	0.152	1
0.27	0.04	0				0.21	0.16	1
0.27	0.038	0				0.21	0.166	1
0.27	0.034	0				0.21	0.173	1
0.27	0.031	0				0.21	0.179	1
0.27	0.031	0				0.21	0.183	1
0.27	0.028	0				0.21	0.178	1
0.27	0.025	0				0.21	0.177	1
0.27	0.027	0				0.21	0.169	1
0.27	0.027	0				0.22	0.159	1
0.27	0.027	0				0.22	0.151	1
0.27	0.024	0				0.22	0.141	1
0.27	0.022	0				0.23	0.144	1
0.27	0.022	0				0.23	0.151	1
0.27	0.026	0				0.24	0.158	1
0.27	0.036	0				0.24	0.157	1
0.27	0.049	0				0.24	0.152	1
0.27	0.053	0				0.24	0.139	1
0.26	0.052	0				0.25	0.129	1
0.26	0.052	0				0.24	0.121	1
0.26	0.055	0				0.24	0.113	1
0.26	0.058	0				0.24	0.106	1
0.26	0.061	0				0.24	0.096	1
0.26	0.064	0				0.24	0.095	1
0.26	0.071	0				0.24	0.096	1
0.28	0.077	0				0.25	0.084	1
0.28	0.084	0				0.25	0.075	1
0.28	0.101	0				0.25	0.065	1
0.28	0.105	0				0.25	0.054	1
0.29	0.11	0				0.25	0.045	1
0.29	0.112	0				0.25	0.043	1
0.29	0.108	0				0.25	0.036	1
0.29	0.11	0				0.25	0.039	1
0.29	0.118	0				0.25	0.042	1
0.29	0.121	0				0.25	0.041	1
0.29	0.13	0				0.25	0.041	1
0.29	0.134	0				0.25	0.041	1
0.29	0.143	0				0.24	0.045	1
0.3	0.145	0				0.25	0.045	1
0.3	0.151	0				0.25	0.044	1
0.3	0.155	0				0.25	0.044	1
0.3	0.161	0				0.25	0.047	1
0.31	0.157	0				0.25	0.049	1
0.31	0.164	0				0.25	0.049	1
0.31	0.17	0				0.25	0.044	1
0.32	0.167	0				0.25	0.043	1
0.32	0.165	0				0.25	0.043	1
0.32	0.161	0				0.25	0.039	1
0.32	0.153	0				0.25	0.036	1
0.32	0.157	0				0.25	0.033	1
0.32	0.15	0				0.25	0.033	1
0.32	0.147	0				0.25	0.03	1
0.32	0.141	0				0.25	0.029	1
0.32	0.145	0				0.25	0.027	1
0.33	0.142	0				0.25	0.024	1
0.32	0.136	0				0.25	0.029	1
0.33	0.13	0				0.26	0.027	1
0.33	0.12	0				0.25	0.026	1
0.33	0.11	0				0.26	0.03	1
0.33	0.11	1				0.26	0.037	1
0.33	0.096	1				0.26	0.037	1
0.33	0.086	1				0.26	0.04	1
0.33	0.077	1				0.26	0.043	1
0.33	0.075	1				0.26	0.046	1
0.32	0.076	1				0.26	0.05	1
0.32	0.073	1				0.26	0.051	1
0.31	0.07	1				0.27	0.051	1
0.31	0.068	1				0.27	0.048	1
0.31	0.061	1				0.27	0.048	1
0.31	0.05	1				0.27	0.048	1
0.31	0.044	1				0.27	0.043	1
0.31	0.037	1				0.27	0.041	1
0.31	0.033	1				0.27	0.042	1
0.31	0.033	1				0.27	0.038	1
0.31	0.029	1				0.27	0.035	1
0.31	0.032	1				0.27	0.036	1
0.31	0.033	1				0.27	0.033	1
0.31	0.033	1				0.27	0.033	1
0.31	0.033	1				0.27	0.033	1
0.31	0.034	1				0.27	0.033	1
0.31	0.029	1				0.27	0.029	1
0.32	0.035	1				0.27	0.032	1
0.32	0.044	1				0.27	0.032	1
0.32	0.054	1				0.27	0.028	1
0.32	0.068	1				0.27	0.032	1
0.33	0.079	1				0.27	0.035	1
0.33	0.099	1				0.27	0.037	1
0.33	0.099	1				0.27	0.032	1
0.33	0.105	1				0.27	0.029	1
0.33	0.116	1				0.27	0.031	1
0.33	0.119	1				0.27	0.026	1
0.33	0.122	1				0.27	0.029	1
0.33	0.129	1				0.27	0.026	1
0.32	0.134	1				0.27	0.026	1
0.31	0.136	1				0.27	0.023	1
0.31	0.149	1				0.27	0.023	1
0.31	0.155	1				0.27	0.023	1
0.31	0.156	1				0.27	0.025	1
0.3	0.168	1				0.27	0.025	1
0.3	0.17	1				0.27	0.022	1
0.3	0.176	1				0.27	0.018	1
0.3	0.173	1				0.27	0.019	1
0.3	0.198	1				0.27	0.026	1
0.29	0.215	1				0.27	0.036	1
0.28	0.226	1				0.27	0.045	1
0.28	0.238	1				0.26	0.052	1
0.28	0.244	1				0.26	0.052	1
0.27	0.245	1				0.25	0.054	1
0.27	0.254	1				0.25	0.051	1
0.27	0.257	1				0.25	0.058	1
0.27	0.253	1				0.25	0.061	1
0.27	0.247	1				0.25	0.058	1
0.27	0.242	1				0.25	0.059	1
0.27	0.226	1				0.25	0.059	1
0.27	0.216	1				0.25	0.064	1
0.27	0.199	1				0.26	0.07	1
0.27	0.183	1				0.26	0.073	1
0.27	0.155	1				0.26	0.071	1
0.27	0.129	1				0.26	0.072	1
0.27	0.109	1				0.26	0.068	1
0.27	0.089	1				0.27	0.078	1
0.27	0.076	1				0.27	0.088	1
0.27	0.072	1				0.28	0.099	1
0.27	0.059	1				0.28	0.112	1
0.27	0.05	1				0.28	0.117	1
0.27	0.043	1				0.28	0.124	1
0.27	0.037	1				0.29	0.128	1
0.27	0.03	1				0.28	0.128	1
0.27	0.027	1				0.29	0.134	1
0.27	0.021	1				0.29	0.133	1
0.27	0.018	1				0.29	0.133	1
0.27	0.02	1				0.29	0.13	1
0.27	0.02	1				0.29	0.133	1
0.27	0.024	1				0.29	0.126	1
0.27	0.029	1				0.29	0.123	1
0.27	0.029	1				0.29	0.113	1
0.27	0.029	1				0.29	0.109	1
0.27	0.027	1				0.29	0.1	1
0.27	0.024	1				0.29	0.094	1
0.27	0.031	1				0.29	0.085	1
0.27	0.031	1				0.29	0.078	1
0.27	0.031	1				0.29	0.081	1
0.27	0.035	1				0.29	0.085	1
0.27	0.035	1				0.29	0.079	1
0.27	0.038	1				0.28	0.079	1
0.26	0.043	1				0.28	0.073	1
0.26	0.045	1				0.28	0.073	1
0.26	0.045	1				0.29	0.069	1
0.26	0.043	1				0.29	0.069	1
0.26	0.036	1				0.29	0.069	1
0.26	0.039	1				0.29	0.069	1
0.26	0.046	1				0.29	0.064	1
0.26	0.044	1				0.28	0.063	1
0.26	0.047	1				0.28	0.06	1
0.26	0.04	1				0.28	0.06	1
0.26	0.04	1				0.28	0.06	1
0.26	0.04	1				0.28	0.053	1
0.26	0.035	1				0.28	0.049	1
0.26	0.035	1				0.28	0.052	1
0.26	0.032	1				0.28	0.055	1
0.26	0.03	1				0.28	0.055	1
0.27	0.029	1				0.28	0.052	1
0.27	0.032	1				0.28	0.052	1
0.27	0.029	1				0.28	0.052	1
0.26	0.029	1				0.29	0.046	1
0.27	0.026	1				0.29	0.043	1
0.27	0.019	1				0.29	0.041	1
0.27	0.022	1				0.29	0.041	1
0.27	0.023	1				0.29	0.039	1
0.26	0.026	1				0.29	0.039	1
0.26	0.027	1				0.29	0.039	1
0.26	0.027	1				0.29	0.042	1
0.26	0.034	1				0.29	0.042	1
0.26	0.038	1				0.29	0.039	1
0.26	0.041	1				0.29	0.032	1
0.26	0.041	1				0.29	0.032	1
0.26	0.044	1				0.29	0.032	1
0.26	0.045	1				0.29	0.033	1
0.26	0.05	1				0.29	0.031	1
0.26	0.059	1				0.29	0.034	1
0.26	0.065	1				0.29	0.031	1
0.26	0.069	1				0.28	0.028	1
0.26	0.069	1				0.28	0.025	1
0.25	0.07	1				0.28	0.026	1
0.25	0.067	1				0.28	0.022	1
0.25	0.067	1				0.28	0.019	1
0.25	0.067	1				0.28	0.016	1
0.25	0.065	1				0.27	0.013	1
0.25	0.06	1				0.27	0.013	1
0.25	0.06	1				0.27	0.016	1
0.25	0.061	1				0.27	0.019	1
0.25	0.059	1				0.27	0.022	1
0.25	0.055	1				0.27	0.024	1
0.25	0.05	1				0.26	0.025	1
0.25	0.044	1				0.26	0.027	1
0.25	0.038	1				0.26	0.034	1
0.25	0.035	1				0.26	0.041	1
0.25	0.032	1				0.26	0.046	1
0.25	0.03	1				0.26	0.047	1
0.25	0.03	1				0.26	0.051	1
0.25	0.026	1				0.26	0.051	1
0.25	0.026	1				0.26	0.056	1
0.25	0.024	1				0.26	0.056	1
0.25	0.022	1				0.26	0.056	1
0.25	0.019	1				0.26	0.056	1
0.25	0.014	1				0.26	0.053	1
0.25	0.01	1				0.26	0.049	1
0.25	0.01	1				0.26	0.045	1
0.25	0.01	1				0.26	0.044	1
0.25	0.006	1				0.26	0.039	1
0.25	0.006	1				0.26	0.031	1
0.25	0.006	1				0.26	0.024	1
0.25	0.006	1				0.26	0.02	1
0.25	0.003	1				0.26	0.016	1
0.25	0.003	1				0.26	0.011	1
0.25	0.003	1				0.26	0.011	1
0.25	0.003	1				0.26	0.006	1
0.25	0	1				0.26	0.006	1
0.25	0	1				0.26	0.006	1
0.25	0	1				0.26	0.006	1
0.25	0	1				0.26	0.01	1
0.25	0	1				0.26	0.013	1
0.25	0	1				0.26	0.017	1
0.25	0	1				0.26	0.017	1
0.25	0	1				0.26	0.021	1
0.25	0	1				0.26	0.021	1
0.25	0	1				0.26	0.021	1
0.25	0	1				0.26	0.025	1
0.25	0	1				0.26	0.025	1
0.25	0	1				0.26	0.028	1
0.25	0	1				0.26	0.033	1
0.25	0.001	1				0.26	0.04	1
0.25	0.001	1				0.26	0.043	1
0.25	0.001	1				0.26	0.046	1
0.25	0.002	1				0.26	0.047	1
0.25	0.006	1				0.26	0.047	1
0.26	0.009	1				0.28	0.043	1
0.26	0.018	1				0.28	0.048	1
0.27	0.024	1				0.28	0.059	1
0.27	0.029	1				0.28	0.065	1
0.27	0.038	1				0.28	0.081	1
0.27	0.043	1				0.28	0.106	1
0.27	0.049	1				0.28	0.118	1
0.27	0.054	1				0.28	0.132	1
0.27	0.061	1				0.28	0.153	1
0.27	0.067	1				0.28	0.181	1
0.27	0.071	1				0.28	0.197	1
0.27	0.071	1				0.28	0.232	1
0.27	0.071	1				0.28	0.256	1
0.27	0.072	1				0.28	0.273	1
0.26	0.069	1				0.28	0.304	1
0.27	0.068	1				0.28	0.351	1
0.27	0.059	1				0.28	0.384	1
0.27	0.056	1				0.1	0.399	1
0.27	0.055	1				0.1	0.429	1
0.26	0.053	1				0.07	0.447	1
0.26	0.054	1				0.07	0.46	1
0.26	0.051	1				0.04	0.469	1
0.26	0.048	1				0.03	0.478	1
0.26	0.051	1				0.03	0.474	1
0.26	0.054	1				0.01	0.454	1
0.25	0.055	1				0.01	0.45	1
0.24	0.059	1				0.01	0.436	1
0.24	0.062	1					0.425	1
0.24	0.069	1					0	1
0.24	0.076	1					0	1
0.24	0.083	1					0	1
0.23	0.091	1					0	1
0.22	0.094	1					0	1
0.22	0.098	1					0	0
0.22	0.101	1					0	0
0.22	0.105	1					0	0
0.22	0.105	1					0	0
0.22	0.106	1					0	0
0.22	0.103	1					0	0
0.2	0.1	1					0	0
0.2	0.102	1					0	0
0.2	0.101	1					0	0
0.2	0.103	1					0	0
0.19	0.101	1					0	0
0.19	0.097	1					0	0
0.19	0.09	1					0	0
0.19	0.085	1					0	0
0.19	0.079	1					0	0
0.19	0.075	1					0	0
0.19	0.065	1					0	0
0.19	0.058	1					0	0
0.19	0.058	1					0	0
0.19	0.058	1					0	0
0.19	0.055	1					0	0
0.19	0.055	1					0	0
0.19	0.049	1					0	0
0.19	0.048	1					0	0
0.19	0.045	1					0	0
0.19	0.042	1					0	0
0.19	0.042	1					0	0
0.19	0.043	1					0	0
0.19	0.043	1					0	0
0.19	0.046	1					0	0
0.19	0.05	1					0	0
0.19	0.054	1					0	0
0.19	0.055	1					0	0
0.19	0.055	1					0	0
0.19	0.055	1					0	0
0.19	0.051	1					0	0
0.2	0.044	1					0	0
0.2	0.044	1					0	0
0.2	0.045	1					0	0
0.2	0.048	1					0	0
0.2	0.048	1					0	0
0.19	0.049	1					0	0
0.19	0.049	1					0	0
0.19	0.056	1					0	0
0.19	0.057	1					0	0
0.19	0.053	1					0	0
0.19	0.054	1					0	0
0.18	0.057	1					0	0
0.18	0.057	1					0	0
0.18	0.06	1					0	0
0.18	0.063	1					0	0
0.18	0.068	1					0	0
0.18	0.08	1					0	0
0.18	0.083	1					0	0
0.18	0.083	1					0	0
0.18	0.084	1					0	0
0.18	0.087	1					0	0
0.17	0.09	1					0	0
0.17	0.091	1					0	0
0.16	0.097	1					0	0
0.16	0.097	1					0	0
0.16	0.1	1					0	0
0.16	0.093	1					0	0
0.16	0.097	1					0	0
0.16	0.104	1					0	0
0.15	0.104	1					0	0
0.15	0.103	1					0	0
0.15	0.094	1					0	0
0.15	0.09	1					0	0
0.15	0.086	1					0	0
0.15	0.084	1					0	0
0.15	0.08	1					0	0
0.15	0.077	1					0	0
0.15	0.069	1					0	0
0.15	0.058	1					0	0
0.15	0.06	1					0	0
0.15	0.056	1					0	0
0.15	0.059	1					0	0
0.15	0.063	1					0.048	0
0.15	0.06	1				0.01	0.058	0
0.15	0.067	1				0.01	0.062	0
0.15	0.071	1				0.01	0.068	0
0.15	0.079	1				0.02	0.077	0
0.15	0.092	1				0.02	0.084	0
0.15	0.101	1				0.02	0.084	0
0.15	0.098	1				0.03	0.094	0
0.15	0.104	1				0.03	0.097	0
0.14	0.111	1				0.03	0.105	0
0.14	0.118	1				0.04	0.105	0
0.14	0.122	1				0.04	0.111	0
0.14	0.122	1				0.05	0.117	0
0.14	0.122	1				0.05	0.114	0
0.14	0.119	1				0.05	0.125	0
0.14	0.111	1				0.05	0.127	0
0.14	0.108	1				0.06	0.131	0
0.14	0.101	1				0.06	0.129	0
0.14	0.103	1				0.06	0.125	0
0.14	0.098	1				0.06	0.123	0
0.14	0.087	1				0.07	0.115	0
0.14	0.085	1				0.07	0.107	0
0.14	0.085	1				0.07	0.102	0
0.14	0.079	1				0.07	0.103	0
0.14	0.071	1				0.07	0.093	0
0.14	0.061	1				0.07	0.092	0
0.14	0.061	1				0.06	0.079	0
0.14	0.061	1				0.06	0.071	0
0.14	0.057	1				0.06	0.068	0
0.14	0.061	1				0.06	0.057	0
0.15	0.061	1				0.06	0.053	0
0.15	0.054	1				0.05	0.047	0
0.15	0.051	1				0.05	0.041	0
0.15	0.045	1				0.05	0.041	0
0.15	0.037	1				0.05	0.037	0
0.15	0.037	1				0.05	0.036	0
0.15	0.03	1				0.05	0.041	0
0.15	0.033	1				0.05	0.044	0
0.15	0.032	1				0.05	0.046	0
0.15	0.029	1				0.05	0.057	0
0.15	0.032	1				0.06	0.065	0
0.15	0.032	1				0.06	0.075	0
0.15	0.027	1				0.06	0.081	0
0.15	0.032	1				0.06	0.083	0
0.16	0.032	1				0.06	0.087	0
0.16	0.033	1				0.06	0.091	0
0.15	0.036	1				0.07	0.094	0
0.15	0.041	1				0.07	0.097	0
0.15	0.04	1				0.07	0.103	0
0.16	0.043	1				0.07	0.11	0
0.16	0.042	1				0.07	0.111	0
0.16	0.045	1				0.07	0.112	0
0.16	0.045	1				0.07	0.112	0
0.16	0.046	1				0.07	0.108	0
0.16	0.05	1				0.08	0.105	0
0.16	0.05	1				0.08	0.101	0
0.16	0.05	1				0.08	0.097	0
0.16	0.053	1				0.09	0.104	0
0.16	0.051	1				0.09	0.107	0
0.16	0.058	1				0.09	0.109	0
0.16	0.069	1				0.09	0.107	0
0.15	0.071	1				0.09	0.114	0
0.15	0.071	1				0.09	0.123	0
0.15	0.072	1				0.09	0.12	0
0.14	0.071	1				0.12	0.12	0
0.14	0.072	1				0.12	0.121	0
0.14	0.071	1				0.12	0.125	0
0.13	0.071	1				0.12	0.125	0
0.13	0.073	1				0.13	0.132	0
0.13	0.073	1				0.14	0.131	0
0.13	0.069	1				0.14	0.138	0
0.13	0.068	1				0.15	0.148	0
0.13	0.069	1				0.15	0.148	0
0.13	0.073	1				0.16	0.148	0
0.13	0.07	1				0.16	0.148	0
0.13	0.061	1				0.17	0.151	0
0.12	0.064	1				0.17	0.145	0
0.11	0.071	1				0.17	0.135	0
0.11	0.082	1				0.17	0.133	0
0.1	0.096	1				0.18	0.13	0
0.1	0.11	1				0.18	0.131	0
0.09	0.126	1				0.18	0.132	0
0.1	0.146	1				0.19	0.14	0
0.1	0.161	1				0.19	0.136	0
0.1	0.185	1				0.2	0.135	0
0.1	0.211	1				0.2	0.132	0
0.11	0.226	1				0.2	0.136	0
0.11	0.239	1				0.2	0.146	0
0.11	0.255	1				0.2	0.153	0
0.11	0.267	1				0.2	0.15	0
0.11	0.288	1				0.25	0.161	0
0.11	0.302	1				0.25	0.17	0
0.15	0.305	1				0.25	0.171	0
0.16	0.302	1				0.25	0.174	0
0.16	0.3	1				0.25	0.172	0
0.17	0.288	1				0.25	0.171	0
0.17	0.274	1				0.25	0.163	0
0.17	0.252	1				0.25	0.151	0
0.17	0.236	1				0.26	0.151	0
0.17	0.212	1				0.26	0.151	0
0.17	0.19	1				0.26	0.148	0
0.17	0.175	1				0.26	0.132	0
0.17	0.165	1				0.26	0.116	0
0.17	0.15	1				0.27	0.104	0
0.17	0.145	1				0.28	0.11	0
0.2	0.135	1				0.28	0.098	0
0.2	0.13	1				0.29	0.094	0
0.21	0.126	1				0.29	0.091	0
0.21	0.131	1				0.29	0.093	0
0.22	0.134	1				0.29	0.097	0
0.22	0.139	1				0.3	0.101	0
0.24	0.146	1				0.3	0.105	0
0.24	0.151	1				0.3	0.106	0
0.24	0.155	1				0.3	0.105	0
0.24	0.158	1				0.3	0.101	0
0.24	0.162	1				0.3	0.097	0
0.25	0.164	1				0.3	0.096	0
0.25	0.162	1				0.3	0.093	0
0.25	0.153	1				0.3	0.088	0
0.25	0.144	1				0.3	0.079	0
0.25	0.131	1				0.3	0.075	0
0.25	0.125	1				0.3	0.064	0
0.25	0.121	1				0.3	0.06	0
0.25	0.109	1				0.3	0.05	0
0.25	0.092	1				0.3	0.048	0
0.25	0.083	1				0.3	0.04	0
0.25	0.075	1				0.3	0.033	0
0.25	0.069	1				0.3	0.032	0
0.25	0.068	1				0.3	0.03	0
0.25	0.062	1				0.3	0.031	0
0.25	0.058	1				0.3	0.032	0
0.25	0.053	1				0.3	0.032	0
0.25	0.049	1				0.3	0.03	0
0.25	0.049	1				0.3	0.03	0
0.25	0.047	1				0.3	0.027	0
0.25	0.047	1				0.3	0.027	0
0.25	0.044	1				0.3	0.031	0
0.25	0.047	1				0.3	0.039	0
0.25	0.05	1				0.3	0.042	0
0.25	0.055	1				0.31	0.041	0
0.25	0.058	1				0.31	0.047	0
0.25	0.056	1				0.31	0.054	0
0.25	0.058	1				0.31	0.055	0
0.25	0.051	1				0.3	0.055	0
0.24	0.056	1				0.3	0.051	0
0.25	0.055	1				0.3	0.052	0
0.25	0.058	1				0.3	0.051	0
0.25	0.057	1				0.3	0.053	0
0.26	0.06	1				0.3	0.056	0
0.26	0.057	1				0.3	0.056	0
0.26	0.056	1				0.3	0.053	0
0.26	0.057	1				0.3	0.049	0
0.26	0.056	1				0.3	0.041	0
0.27	0.058	1				0.3	0.038	0
0.27	0.068	1				0.3	0.038	0
0.27	0.069	1				0.3	0.032	0
0.28	0.087	1				0.3	0.025	0
0.28	0.095	1				0.3	0.028	0
0.28	0.106	1				0.3	0.025	0
0.28	0.108	1				0.29	0.025	0
0.28	0.113	1				0.29	0.022	0
0.29	0.121	1				0.29	0.022	0
0.29	0.128	1				0.29	0.017	0
0.29	0.127	1				0.29	0.014	0
0.29	0.127	1				0.29	0.017	0
0.29	0.124	1				0.29	0.021	0
0.29	0.12	1				0.29	0.021	0
0.29	0.113	1				0.29	0.021	0
0.29	0.104	1				0.29	0.021	0
0.29	0.092	1				0.29	0.017	0
0.29	0.085	1				0.29	0.017	0
0.29	0.07	1				0.29	0.017	0
0.29	0.063	1				0.29	0.01	0
0.29	0.059	1				0.29	0.01	0
0.29	0.056	1				0.29	0.01	0
0.29	0.053	1				0.29	0.01	0
0.28	0.044	1				0.29	0.007	0
0.28	0.037	1				0.29	0.007	0
0.28	0.039	1				0.29	0.007	0
0.28	0.041	1				0.29	0.007	1
0.28	0.049	1				0.29	0.003	1
0.29	0.052	1				0.29	0.003	1
0.29	0.063	1				0.29	0.006	1
0.29	0.072	1				0.29	0.006	1
0.29	0.086	1				0.29	0.011	1
0.29	0.099	1				0.29	0.016	1
0.29	0.105	1				0.29	0.019	1
0.3	0.11	1				0.29	0.019	1
0.3	0.116	1				0.28	0.021	1
0.3	0.133	1				0.27	0.021	1
0.3	0.138	1				0.27	0.024	1
0.31	0.153	1				0.27	0.03	1
0.31	0.167	1				0.27	0.034	1
0.31	0.173	1				0.26	0.038	1
0.31	0.186	1				0.27	0.041	1
0.32	0.189	1				0.27	0.049	1
0.32	0.186	1				0.27	0.052	1
0.32	0.181	1				0.27	0.053	1
0.32	0.174	1				0.27	0.057	1
0.32	0.164	1				0.27	0.058	1
0.32	0.156	1				0.27	0.058	1
0.32	0.153	1				0.27	0.062	1
0.32	0.147	1				0.27	0.069	1
0.32	0.137	1				0.27	0.072	1
0.32	0.122	1				0.27	0.076	1
0.32	0.115	1				0.27	0.078	1
0.31	0.097	1				0.27	0.079	1
0.31	0.091	1				0.27	0.078	1
0.31	0.088	1				0.27	0.077	1
0.31	0.072	1				0.27	0.074	1
0.31	0.066	1				0.27	0.067	1
0.32	0.066	1				0.28	0.063	1
0.32	0.062	1				0.28	0.059	1
0.32	0.063	1				0.28	0.055	1
0.32	0.057	1				0.28	0.049	1
0.32	0.052	1				0.28	0.044	1
0.32	0.049	1				0.28	0.041	1
0.32	0.049	1				0.28	0.037	1
0.32	0.049	1				0.28	0.032	1
0.32	0.044	1				0.28	0.032	1
0.32	0.046	1				0.29	0.032	1
0.32	0.043	1				0.29	0.032	1
0.32	0.037	1				0.29	0.036	1
0.32	0.03	1				0.29	0.042	1
0.33	0.033	1				0.3	0.059	1
0.33	0.03	1				0.3	0.071	1
0.33	0.027	1				0.3	0.08	1
0.33	0.029	1				0.3	0.084	1
0.33	0.028	1				0.3	0.089	1
0.33	0.033	1				0.3	0.1	1
0.33	0.038	1				0.31	0.109	1
0.33	0.044	1				0.31	0.113	1
0.33	0.044	1				0.31	0.118	1
0.33	0.045	1				0.31	0.125	1
0.33	0.048	1				0.31	0.134	1
0.33	0.048	1				0.3	0.139	1
0.33	0.051	1				0.3	0.149	1
0.34	0.056	1				0.29	0.155	1
0.34	0.056	1				0.29	0.157	1
0.34	0.056	1				0.29	0.156	1
0.34	0.059	1				0.28	0.161	1
0.34	0.06	1				0.28	0.165	1
0.34	0.056	1				0.28	0.177	1
0.34	0.058	1				0.28	0.186	1
0.35	0.056	1				0.27	0.194	1
0.35	0.055	1				0.26	0.201	1
0.35	0.049	1				0.26	0.209	1
0.35	0.048	1				0.26	0.214	1
0.35	0.05	1				0.25	0.216	1
0.35	0.047	1				0.25	0.225	1
0.35	0.047	1				0.24	0.232	1
0.35	0.047	1				0.24	0.242	1
0.35	0.045	1				0.24	0.245	1
0.35	0.049	1				0.23	0.254	1
0.35	0.048	1				0.23	0.251	1
0.35	0.05	1				0.23	0.254	1
0.35	0.047	1				0.23	0.257	1
0.35	0.047	1				0.22	0.258	1
0.35	0.04	1				0.21	0.264	1
0.35	0.037	1				0.21	0.268	1
0.35	0.034	1				0.2	0.261	1
0.35	0.031	1				0.2	0.26	1
0.35	0.032	1				0.2	0.261	1
0.35	0.025	1				0.2	0.278	1
0.35	0.025	1				0.18	0.272	1
0.35	0.024	1				0.17	0.281	1
0.35	0.024	1				0.17	0.273	1
0.34	0.023	1				0.16	0.271	1
0.34	0.02	1				0.15	0.261	1
0.35	0.021	1				0.15	0.26	1
0.35	0.02	1				0.14	0.255	1
0.34	0.023	1				0.14	0.255	1
0.34	0.023	1				0.12	0.257	1
0.34	0.026	1				0.11	0.26	1
0.34	0.026	1				0.11	0.253	1
0.34	0.026	1				0.1	0.262	1
0.34	0.03	1				0.09	0.265	1
0.34	0.026	1				0.08	0.277	1
0.34	0.026	1				0.07	0.274	1
0.34	0.026	1				0.07	0.278	1
0.34	0.023	1				0.04	0.28	1
0.34	0.02	1				0.03	0.288	1
0.34	0.018	1				0.01	0.3	1
0.34	0.018	1				0.01	0.317	1
0.34	0.018	1					0.326	1
0.35	0.014	1					0.331	1
0.35	0.011	1					0.329	1
0.35	0.013	1					0.32	1
0.35	0.01	1					0.32	1
0.35	0.01	1					0.307	1
0.35	0.013	1					0.294	1
0.35	0.013	1					0.282	1
0.35	0.013	1					0.282	0
0.35	0.013	1					0	0
0.35	0.016	1					0	0
0.35	0.016	1					0	0
0.35	0.016	1					0	0
0.35	0.016	1					0	0
0.35	0.016	1					0	0
0.35	0.012	1					0	0
0.35	0.015	1					0	0
0.36	0.018	1					0	0
0.36	0.02	1					0	0
0.36	0.023	1					0	0
0.36	0.023	1					0	0
0.36	0.02	1					0	0
0.36	0.019	1					0	0
0.35	0.024	1					0	0
0.35	0.026	1					0	0
0.35	0.023	1					0	0
0.35	0.026	1					0	0
0.35	0.026	1					0	0
0.35	0.026	1					0	0
0.35	0.026	1					0	0
0.35	0.029	1					0	0
0.35	0.029	1					0	0
0.35	0.026	1					0	0
0.35	0.023	1					0	0
0.35	0.019	1					0	0
0.35	0.019	1					0	0
0.34	0.027	1					0	0
0.34	0.027	1					0	0
0.34	0.025	1					0	0
0.34	0.027	1					0	0
0.34	0.033	1					0	0
0.33	0.033	1					0	0
0.33	0.036	1					0	0
0.34	0.036	1					0	0
0.33	0.038	1					0	0
0.33	0.035	1					0	0
0.33	0.032	1					0	0
0.33	0.032	1					0	0
0.34	0.035	1					0	0
0.33	0.038	1					0	0
0.32	0.043	1					0	0
0.32	0.043	1					0	0
0.32	0.04	1					0	0
0.31	0.04	1					0	0
0.31	0.04	1					0	0
0.31	0.037	1					0	0
0.31	0.037	1					0	0
0.31	0.037	1					0	0
0.31	0.04	1					0	0
0.31	0.041	1					0	0
0.31	0.045	1					0	0
0.31	0.049	1					0	0
0.3	0.055	1					0	0
0.3	0.058	1					0	0
0.3	0.065	1					0	0
0.29	0.067	1					0.079	0
0.29	0.078	1					0.081	0
0.29	0.085	1				0.01	0.082	0
0.29	0.088	1				0.01	0.079	0
0.29	0.09	1				0.01	0.079	0
0.28	0.09	1				0.01	0.081	0
0.28	0.09	1				0.01	0.078	0
0.28	0.091	1				0.01	0.074	0
0.28	0.091	1				0.01	0.074	0
0.28	0.088	1				0.01	0.078	0
0.28	0.085	1				0.01	0.078	0
0.28	0.086	1				0.03	0.07	0
0.28	0.082	1				0.03	0.073	0
0.28	0.076	1				0.03	0.072	0
0.28	0.065	1				0.03	0.078	0
0.29	0.064	1				0.03	0.082	0
0.28	0.046	1				0.04	0.087	0
0.28	0.038	1				0.04	0.092	0
0.28	0.037	1				0.04	0.098	0
0.28	0.032	1				0.04	0.104	0
0.28	0.031	1				0.05	0.103	0
0.28	0.032	1				0.05	0.106	0
0.28	0.028	1				0.05	0.114	0
0.27	0.031	1				0.05	0.12	0
0.27	0.038	1				0.05	0.132	0
0.27	0.041	1				0.05	0.139	0
0.26	0.045	1				0.05	0.147	0
0.26	0.045	1				0.05	0.15	0
0.26	0.05	1				0.05	0.16	0
0.26	0.054	1				0.05	0.157	0
0.26	0.052	1				0.05	0.16	0
0.26	0.056	1				0.05	0.161	0
0.25	0.062	1				0.05	0.162	0
0.24	0.072	1				0.05	0.162	0
0.24	0.081	1				0.05	0.162	0
0.24	0.086	1				0.05	0.162	0
0.24	0.085	1				0.05	0.162	0
0.24	0.088	1				0.07	0.153	0
0.24	0.085	1				0.07	0.142	0
0.23	0.082	1				0.07	0.124	0
0.23	0.078	1				0.08	0.117	0
0.23	0.073	1				0.08	0.113	0
0.23	0.073	1				0.08	0.105	0
0.23	0.072	1				0.08	0.099	0
0.23	0.071	1				0.08	0.102	0
0.23	0.071	1				0.08	0.096	0
0.23	0.071	1				0.08	0.095	0
0.23	0.064	1				0.08	0.089	0
0.23	0.053	1				0.08	0.085	0
0.23	0.044	1				0.08	0.079	0
0.23	0.037	1				0.08	0.083	0
0.23	0.034	1				0.08	0.083	0
0.23	0.033	1				0.08	0.085	0
0.23	0.03	1				0.08	0.091	0
0.23	0.026	1				0.08	0.096	0
0.23	0.026	1				0.08	0.093	0
0.23	0.023	1				0.08	0.093	0
0.23	0.019	1				0.08	0.094	0
0.23	0.016	1				0.08	0.09	0
0.23	0.013	1				0.08	0.087	0
0.23	0.013	1				0.08	0.088	0
0.23	0.01	1				0.08	0.082	0
0.23	0.013	1				0.08	0.08	0
0.23	0.01	1				0.08	0.08	0
0.23	0.017	1				0.08	0.08	0
0.23	0.024	1				0.08	0.08	0
0.23	0.029	1				0.08	0.081	0
0.23	0.03	1				0.08	0.075	0
0.23	0.033	1				0.08	0.069	0
0.22	0.038	1				0.08	0.067	0
0.22	0.042	1				0.08	0.063	0
0.22	0.047	1				0.08	0.063	0
0.22	0.05	1				0.08	0.058	0
0.22	0.056	1				0.08	0.057	0
0.21	0.066	1				0.08	0.054	0
0.21	0.072	1				0.08	0.053	0
0.21	0.08	1				0.08	0.053	0
0.21	0.081	1				0.08	0.056	0
0.2	0.086	1				0.08	0.053	0
0.2	0.083	1				0.08	0.056	0
0.2	0.083	1				0.09	0.056	0
0.19	0.083	1				0.09	0.059	0
0.19	0.085	1				0.09	0.064	0
0.19	0.085	1				0.09	0.073	0
0.19	0.094	1				0.11	0.081	0
0.19	0.093	1				0.11	0.084	0
0.19	0.093	1				0.11	0.089	0
0.19	0.09	1				0.11	0.097	0
0.19	0.087	1				0.11	0.1	0
0.19	0.081	1				0.11	0.104	0
0.2	0.074	1				0.11	0.111	0
0.2	0.071	1				0.14	0.111	0
0.2	0.069	1				0.14	0.109	0
0.2	0.068	1				0.14	0.114	0
0.2	0.068	1				0.14	0.114	0
0.2	0.061	1				0.14	0.114	0
0.2	0.061	1				0.15	0.107	0
0.21	0.058	1				0.15	0.107	0
0.21	0.055	1				0.15	0.094	0
0.21	0.045	1				0.15	0.087	0
0.22	0.045	1				0.15	0.088	0
0.22	0.044	1				0.15	0.078	0
0.21	0.046	1				0.16	0.07	0
0.22	0.047	1				0.16	0.074	0
0.22	0.048	1				0.16	0.07	0
0.22	0.044	1				0.16	0.064	0
0.22	0.04	1				0.16	0.065	0
0.23	0.04	1				0.17	0.068	0
0.23	0.041	1				0.17	0.061	0
0.23	0.037	1				0.17	0.061	0
0.23	0.037	1				0.17	0.058	0
0.23	0.035	1				0.17	0.066	0
0.23	0.037	1				0.18	0.061	0
0.24	0.044	1				0.18	0.07	0
0.25	0.044	1				0.19	0.074	0
0.25	0.044	1				0.19	0.074	0
0.25	0.048	1				0.19	0.079	0
0.26	0.052	1				0.19	0.084	0
0.26	0.052	1				0.19	0.076	0
0.26	0.059	1				0.19	0.078	0
0.27	0.066	1				0.19	0.079	0
0.27	0.076	1				0.19	0.082	0
0.27	0.082	1				0.19	0.08	0
0.28	0.087	1				0.19	0.077	0
0.28	0.098	1				0.19	0.075	0
0.28	0.105	1				0.19	0.076	0
0.28	0.105	1				0.19	0.064	0
0.29	0.104	1				0.19	0.064	0
0.29	0.097	1				0.19	0.06	0
0.29	0.096	1				0.19	0.053	0
0.29	0.093	1				0.2	0.048	0
0.29	0.085	1				0.2	0.047	0
0.29	0.079	1				0.2	0.04	0
0.29	0.074	1				0.2	0.039	0
0.29	0.071	1				0.2	0.039	0
0.29	0.068	1				0.2	0.034	0
0.29	0.062	1				0.2	0.027	0
0.29	0.053	1				0.2	0.024	0
0.29	0.043	1				0.2	0.028	0
0.29	0.036	1				0.2	0.024	0
0.29	0.028	1				0.2	0.022	0
0.29	0.025	1				0.2	0.022	0
0.29	0.021	1				0.2	0.026	0
0.29	0.021	1				0.2	0.021	0
0.29	0.018	1				0.2	0.024	0
0.29	0.018	1				0.2	0.024	0
0.29	0.018	1				0.2	0.021	0
0.29	0.021	1				0.2	0.021	0
0.29	0.021	1				0.2	0.019	0
0.29	0.017	1				0.2	0.014	0
0.29	0.013	1				0.2	0.014	0
0.29	0.01	1				0.2	0.014	0
0.29	0.01	1				0.2	0.018	0
0.29	0.013	1				0.2	0.013	0
0.29	0.013	1				0.2	0.016	0
0.29	0.016	1				0.2	0.016	0
0.29	0.021	1				0.2	0.019	0
0.29	0.021	1				0.2	0.019	0
0.29	0.021	1				0.2	0.024	0
0.29	0.024	1				0.2	0.021	0
0.29	0.024	1				0.2	0.021	0
0.29	0.029	1				0.2	0.024	0
0.29	0.025	1				0.2	0.024	0
0.29	0.028	1				0.2	0.026	0
0.29	0.028	1				0.2	0.031	0
0.29	0.028	1				0.2	0.031	0
0.29	0.031	1				0.2	0.04	0
0.29	0.034	1				0.2	0.043	0
0.29	0.031	1				0.2	0.05	0
0.29	0.031	1				0.2	0.05	0
0.29	0.032	1				0.2	0.053	0
0.29	0.031	1				0.2	0.057	0
0.29	0.031	1				0.2	0.059	0
0.29	0.033	1				0.2	0.068	0
0.29	0.03	1				0.2	0.072	0
0.29	0.03	1				0.2	0.075	0
0.29	0.03	1				0.2	0.075	0
0.29	0.037	1				0.2	0.08	0
0.3	0.041	1				0.22	0.081	0
0.31	0.043	1				0.22	0.085	0
0.31	0.047	1				0.22	0.092	0
0.31	0.053	1				0.23	0.086	0
0.31	0.053	0				0.23	0.086	1
0.31	0.057	0				0.23	0.083	1
0.31	0.061	0				0.23	0.075	1
0.32	0.064	0				0.23	0.074	1
0.34	0.066	0				0.23	0.071	1
0.34	0.072	0				0.23	0.067	1
0.34	0.078	0				0.23	0.063	1
0.34	0.083	0				0.23	0.052	1
0.35	0.092	0				0.23	0.051	1
0.35	0.099	0				0.23	0.051	1
0.36	0.097	0				0.23	0.048	1
0.36	0.092	0				0.23	0.043	1
0.36	0.089	0				0.23	0.043	1
0.36	0.084	0				0.23	0.034	1
0.36	0.081	0				0.23	0.031	1
0.36	0.077	0				0.23	0.028	1
0.36	0.073	0				0.23	0.025	1
0.37	0.069	0				0.23	0.025	1
0.37	0.063	0				0.23	0.026	1
0.37	0.059	0				0.23	0.023	1
0.37	0.049	0				0.23	0.019	1
0.37	0.043	0				0.23	0.019	1
0.37	0.037	0				0.23	0.021	1
0.37	0.031	0				0.23	0.017	1
0.37	0.027	0				0.23	0.019	1
0.37	0.03	0				0.23	0.022	1
0.37	0.028	0				0.23	0.03	1
0.37	0.027	0				0.23	0.034	1
0.37	0.031	0				0.23	0.037	1
0.37	0.032	0				0.23	0.037	1
0.37	0.03	0				0.23	0.037	1
0.37	0.03	0				0.23	0.04	1
0.37	0.029	0				0.23	0.043	1
0.37	0.029	0				0.23	0.043	1
0.37	0.032	0				0.22	0.046	1
0.37	0.032	0				0.22	0.049	1
0.37	0.032	0				0.22	0.054	1
0.37	0.032	0				0.23	0.057	1
0.37	0.033	0				0.23	0.064	1
0.37	0.03	0				0.23	0.063	1
0.37	0.026	0				0.23	0.063	1
0.37	0.029	0				0.23	0.058	1
0.37	0.031	0				0.23	0.055	1
0.37	0.032	0				0.23	0.051	1
0.37	0.038	0				0.23	0.048	1
0.37	0.043	0				0.23	0.051	1
0.36	0.047	0				0.23	0.051	1
0.36	0.052	0				0.23	0.051	1
0.36	0.056	0				0.23	0.052	1
0.35	0.052	0				0.23	0.052	1
0.35	0.055	0				0.23	0.052	1
0.35	0.059	0				0.23	0.05	1
0.35	0.064	0				0.23	0.043	1
0.35	0.062	0				0.23	0.038	1
0.35	0.066	0				0.23	0.035	1
0.35	0.073	0				0.23	0.031	1
0.35	0.073	0				0.23	0.028	1
0.35	0.075	0				0.23	0.029	1
0.35	0.07	0				0.23	0.029	1
0.34	0.065	0				0.23	0.029	1
0.35	0.062	0				0.23	0.026	1
0.35	0.057	0				0.23	0.026	1
0.34	0.052	0				0.23	0.023	1
0.35	0.052	0				0.23	0.022	1
0.35	0.052	0				0.23	0.022	1
0.34	0.049	0				0.23	0.026	1
0.35	0.048	0				0.23	0.029	1
0.34	0.043	0				0.23	0.036	1
0.35	0.043	0				0.23	0.041	1
0.35	0.047	0				0.24	0.045	1
0.34	0.044	0				0.24	0.045	1
0.34	0.048	0				0.24	0.052	1
0.33	0.047	0				0.24	0.051	1
0.33	0.054	0				0.24	0.055	1
0.33	0.054	0				0.24	0.062	1
0.33	0.056	0				0.24	0.069	1
0.33	0.054	0				0.24	0.075	1
0.33	0.057	0				0.24	0.081	1
0.34	0.056	0				0.24	0.086	1
0.34	0.056	0				0.24	0.088	1
0.34	0.056	0				0.24	0.088	1
0.34	0.053	0				0.24	0.085	1
0.34	0.059	0				0.24	0.084	1
0.34	0.056	0				0.24	0.081	1
0.34	0.05	0				0.24	0.082	1
0.34	0.042	0				0.24	0.095	1
0.34	0.039	0				0.24	0.098	1
0.34	0.033	0				0.24	0.105	1
0.34	0.029	0				0.24	0.111	1
0.33	0.026	0				0.24	0.11	1
0.33	0.02	0				0.26	0.114	1
0.33	0.02	0				0.26	0.114	1
0.33	0.019	0				0.26	0.117	1
0.33	0.02	0				0.26	0.124	1
0.33	0.02	0				0.26	0.123	1
0.33	0.023	0				0.27	0.126	1
0.33	0.023	0				0.27	0.14	1
0.33	0.019	0				0.27	0.147	1
0.33	0.022	0				0.27	0.159	1
0.33	0.026	0				0.28	0.157	1
0.33	0.029	0				0.28	0.148	1
0.33	0.029	0				0.28	0.141	1
0.33	0.033	0				0.28	0.137	1
0.33	0.036	0				0.28	0.134	1
0.33	0.044	0				0.28	0.13	1
0.33	0.047	0				0.28	0.127	1
0.33	0.054	0				0.28	0.121	1
0.33	0.057	0				0.28	0.118	1
0.33	0.061	0				0.28	0.105	1
0.33	0.065	0				0.28	0.104	1
0.33	0.062	0				0.28	0.097	1
0.32	0.065	0				0.28	0.084	1
0.32	0.062	0				0.28	0.073	1
0.32	0.062	0				0.28	0.06	1
0.32	0.059	0				0.28	0.061	1
0.32	0.056	0				0.28	0.065	1
0.32	0.052	0				0.28	0.069	1
0.32	0.051	0				0.28	0.067	1
0.32	0.048	0				0.28	0.063	1
0.32	0.044	0				0.28	0.07	1
0.32	0.041	0				0.28	0.07	1
0.32	0.037	0				0.28	0.072	1
0.32	0.032	0				0.28	0.068	1
0.32	0.026	0				0.28	0.075	1
0.32	0.021	0				0.28	0.075	1
0.32	0.021	0				0.28	0.075	1
0.32	0.018	0				0.28	0.075	1
0.32	0.018	0				0.28	0.072	1
0.32	0.015	0				0.28	0.072	1
0.32	0.015	0				0.28	0.068	1
0.32	0.018	0				0.28	0.06	1
0.32	0.018	0				0.28	0.053	1
0.32	0.017	0				0.28	0.049	1
0.32	0.018	0				0.28	0.048	1
0.32	0.015	0				0.28	0.039	1
0.32	0.018	0				0.28	0.033	1
0.32	0.015	0				0.28	0.026	1
0.32	0.013	0				0.28	0.023	1
0.32	0.013	0				0.28	0.019	1
0.32	0.016	0				0.28	0.019	1
0.32	0.016	0				0.28	0.019	1
0.32	0.02	0				0.28	0.019	1
0.32	0.023	0				0.28	0.019	1
0.32	0.026	0				0.28	0.016	1
0.32	0.026	0				0.28	0.016	1
0.32	0.026	0				0.28	0.016	1
0.32	0.029	0				0.28	0.019	1
0.32	0.03	0				0.28	0.023	1
0.32	0.029	0				0.28	0.024	1
0.32	0.035	0				0.28	0.024	1
0.32	0.032	0				0.28	0.024	1
0.32	0.035	0				0.28	0.028	1
0.32	0.043	0				0.28	0.028	1
0.27	0.046	0				0.28	0.024	1
0.27	0.049	0				0.28	0.022	1
0.26	0.052	0				0.28	0.019	1
0.26	0.053	0				0.28	0.016	1
0.26	0.057	0				0.28	0.019	1
0.26	0.059	0				0.28	0.019	1
0.26	0.065	0				0.28	0.023	1
0.25	0.065	0				0.28	0.023	1
0.25	0.062	0				0.28	0.023	1
0.25	0.062	0				0.28	0.02	1
0.25	0.062	0				0.28	0.017	1
0.25	0.059	0				0.28	0.022	1
0.25	0.059	0				0.28	0.025	1
0.25	0.059	0				0.28	0.022	1
0.25	0.058	0				0.28	0.025	1
0.24	0.058	0				0.28	0.028	1
0.24	0.056	0				0.28	0.027	1
0.23	0.063	0				0.28	0.03	1
0.23	0.062	0				0.28	0.03	1
0.23	0.061	0				0.28	0.031	1
0.23	0.064	0				0.28	0.031	1
0.23	0.067	0				0.28	0.026	1
0.22	0.069	0				0.28	0.029	1
0.22	0.079	0				0.28	0.026	1
0.22	0.08	0				0.28	0.029	1
0.22	0.077	0				0.28	0.027	1
0.22	0.077	0				0.28	0.023	1
0.21	0.089	0				0.28	0.024	1
0.21	0.092	0				0.28	0.027	1
0.21	0.096	0				0.28	0.03	1
0.21	0.1	0				0.28	0.029	1
0.21	0.1	0				0.28	0.039	1
0.21	0.09	0				0.28	0.049	1
0.21	0.09	0				0.28	0.056	1
0.2	0.087	0				0.28	0.06	1
0.21	0.083	0				0.28	0.07	1
0.21	0.076	0				0.28	0.077	1
0.2	0.075	0				0.28	0.079	1
0.2	0.065	0				0.28	0.082	1
0.2	0.063	0				0.28	0.079	1
0.2	0.066	0				0.28	0.079	1
0.2	0.066	0				0.28	0.079	1
0.2	0.055	0				0.28	0.077	1
0.2	0.051	0				0.28	0.074	1
0.2	0.041	0				0.28	0.072	1
0.2	0.034	0				0.28	0.07	1
0.2	0.032	0				0.28	0.06	1
0.2	0.042	0				0.28	0.047	1
0.2	0.05	0				0.28	0.043	1
0.19	0.062	0				0.28	0.036	1
0.18	0.068	0				0.28	0.029	1
0.18	0.069	0				0.28	0.027	1
0.18	0.076	0				0.28	0.027	1
0.18	0.089	0				0.28	0.03	1
0.18	0.096	0				0.28	0.033	1
0.18	0.101	0				0.28	0.045	1
0.16	0.114	0				0.28	0.05	1
0.16	0.135	0				0.28	0.058	1
0.15	0.145	0				0.28	0.062	1
0.14	0.156	0				0.28	0.064	1
0.14	0.166	0				0.28	0.072	1
0.13	0.173	0				0.28	0.075	1
0.13	0.169	0				0.28	0.079	1
0.13	0.169	0				0.28	0.079	1
0.12	0.168	0				0.28	0.083	1
0.12	0.169	0				0.28	0.087	1
0.11	0.175	0				0.28	0.085	1
0.11	0.172	0				0.28	0.084	1
0.11	0.166	0				0.28	0.077	1
0.11	0.16	0				0.28	0.078	1
0.11	0.156	0				0.28	0.07	1
0.11	0.146	0				0.28	0.068	1
0.11	0.138	0				0.28	0.059	1
0.11	0.141	0				0.28	0.055	1
0.08	0.149	0				0.27	0.053	1
0.07	0.157	0				0.27	0.046	1
0.07	0.159	0				0.27	0.043	1
0.07	0.167	0				0.28	0.043	1
0.07	0.18	0				0.27	0.042	1
0.06	0.173	0				0.27	0.043	1
0.05	0.175	0				0.27	0.035	1
0.05	0.178	0				0.28	0.035	1
0.04	0.181	0				0.28	0.035	1
0.04	0.184	0				0.28	0.038	1
0.03	0.189	0				0.28	0.034	1
0.03	0.196	0				0.28	0.031	1
0.03	0.196	0				0.28	0.028	1
0.03	0.201	0				0.28	0.028	1
0.03	0.188	0				0.28	0.028	1
0.02	0.172	0				0.27	0.024	1
0.02	0.159	0				0.27	0.024	1
0.02	0.151	0				0.27	0.026	1
0.01	0.148	0				0.27	0.022	1
0.01	0.13	0				0.27	0.022	1
0.01	0.135	0				0.27	0.025	1
0.01	0.131	0				0.27	0.025	1
	0.131	0				0.27	0.026	1
	0.133	0				0.27	0.022	1
	0.132	0				0.27	0.019	1
	0.127	0				0.27	0.022	1
	0.124	0				0.27	0.022	1
	0.129	0				0.27	0.027	1
	0.122	0				0.27	0.023	1
	0.128	0				0.27	0.023	1
	0.135	0				0.27	0.027	1
	0.138	0				0.27	0.027	1
	0.138	0				0.26	0.028	1
	0.137	0				0.26	0.031	1
	0.131	0				0.26	0.028	1
	0.127	0				0.26	0.021	1
	0.118	0				0.26	0.024	1
	0.111	0				0.27	0.024	1
0.01	0.097	0				0.27	0.026	1
0.01	0.088	0				0.26	0.026	1
0.01	0.079	0				0.26	0.023	1
0.01	0.077	0				0.26	0.026	1
0.01	0.077	0				0.26	0.025	1
0.01	0.074	0				0.26	0.025	1
	0.068	0				0.27	0.028	1
	0.065	0				0.26	0.028	1
	0.059	0				0.27	0.028	1
	0.057	0				0.26	0.029	1
	0.057	0				0.26	0.026	1
	0.058	0				0.26	0.029	1
	0.062	0				0.26	0.034	1
	0.063	0				0.26	0.031	1
	0.063	0				0.26	0.032	1
	0.067	0				0.26	0.033	1
	0.064	0				0.26	0.036	1
	0.066	0				0.26	0.04	1
	0.063	0				0.26	0.036	1
	0.057	0				0.26	0.033	1
	0.05	0				0.26	0.036	1
	0.048	0				0.26	0.036	1
	0.044	0				0.26	0.036	1
	0.049	0				0.26	0.036	1
	0.05	0				0.26	0.035	1
	0.052	0				0.26	0.038	1
	0.049	0				0.26	0.035	1
	0.041	0				0.26	0.031	1
	0.043	0				0.25	0.035	1
	0.046	0				0.25	0.031	1
	0.044	0				0.25	0.031	1
	0.047	0				0.25	0.031	1
[truncated: 1,906 more rows]

## Sheet: Fig 7G
	GFP 6 Hz	ChR2 6 Hz	GFP 20 Hz	ChR2 20 Hz
	0.0549	0.1	0.2304	0.1933
	0.04581	0.05486	0.1141	0.1265
	0.03809	0.07125	0.147	0.1304
	0.06656	0.6	0.231	0.3841
	0.06738	0.28	0.1998	0.2311
	0.07543	0.22	0.2046	0.5597
	0.064	0.3668	0.17	0.73
	0.043	0.1998	0.143	0.09
	0.05203	0.23965		0.23
	0.04547	0.2288		0.29
	0.07543	0.2009		0.57
	0.064	0.1994		0.44
	0.06	0.15
	0.1901	0.54
	0.2449	0.24
	0.2819	0.3632
	0.2796	0.4
	0.1716	0.22
	0.2945	0.14
	0.3513

## Sheet: Fig 7I
GFP 20 Hz				ChR2 20 Hz
Distance to Shelter	Speed	Light On		Distance to Shelter	Speed	Light On
		0		0.01	0	0
		0		0.012	0	0
		0		0.013	0	0
0.25		0		0.014	0	0
0.25		0		0.015	0	0
0.25		0		0.015	0	0
0.24		0		0.03	0	0
0.23		0		0.03	0.02	0
0.23		0		0.03	0.02	0
0.23		0		0.03	0.02	0
0.23		0		0.03	0.02	0
0.22		0		0.032	0.02	0
0.21		0		0.032	0.02	0
0.2		0		0.031	0.02	0
0.19		0		0.033	0.02	0
0.19		0		0.034	0.02	0
0.18	0.112	0		0.035	0.02	0
0.17	0.13	0		0.036	0.02	0
0.16	0.143	0		0.037	0.02	0
0.15	0.155	0		0.039	0.02	0
0.14	0.164	0		0.041	0.02	0
0.14	0.173	0		0.041	0.02	0
0.14	0.182	0		0.028	0.02	0
0.12	0.189	0		0.03	0.02	0
0.12	0.2	0		0.031	0.03	0
0.11	0.21	0		0.032	0.03	0
0.11	0.208	0		0.03	0.03	0
0.1	0.195	0		0.03	0.03	0
0.1	0.184	0		0.03	0.03	0
0.1	0.174	0		0.029	0.03	0
0.09	0.164	0		0.03	0.03	0
0.09	0.159	0		0.032	0.03	0
0.09	0.142	0		0.033	0.03	0
0.09	0.13	0		0.032	0.03	0
0.08	0.121	0		0.029	0.03	0
0.08	0.121	0		0.031	0.04	0
0.08	0.113	0		0.032	0.04	0
0.08	0.104	0		0.03	0.04	0
0.04	0.098	0		0.029	0.04	0
0.04	0.087	0		0.028	0.04	0
0.04	0.076	0		0.028	0.04	0
0.03	0.066	0		0.031	0.04	0
0.03	0.063	0		0.033	0.03	0
0.03	0.057	0		0.034	0.03	0
0.03	0.052	0		0.035	0.03	0
0.03	0.051	0		0.034	0.03	0
0.03	0.054	0		0.033	0.03	0
	0.061	0		0.032	0.03	0
	0.061	0		0.034	0.03	0
	0.064	0		0.034	0.02	0
	0.057	0		0.032	0.02	0
	0.062	0		0.032	0.02	0
	0.068	0		0.032	0.02	0
	0.069	0		0.03	0.02	0
	0.071	0		0.03	0.02	0
	0.067	0		0.03	0.02	0
	0.066	0		0.028	0.02	0
	0.067	0		0.027	0.02	0
	0.07	0		0.026	0.02	0
	0.07	0		0.025	0.02	0
	0.072	0		0.023	0.02	0
	0.072	0		0.02	0.02	0
	0.063	0		0.018	0.02	0
	0.058	0		0.015	0.02	0
	0.06	0		0.013	0.02	0
	0.062	0		0.012	0.02	0
	0.061	0		0.01	0.02	0
	0.058	0		0.01	0.02	0
	0.054	0		0.012	0.02	0
	0.057	0		0.012	0.02	0
	0.067	0		0.011	0.02	0
	0.068	0		0.01	0.02	0
	0.079	0		0.009	0.02	0
	0.076	0		0.011	0.02	0
	0.073	0		0.011	0.02	0
	0.07	0		0.011	0.02	0
	0.07	0		0.011	0.02	0
	0.071	0		0.011	0.02	0
	0.067	0		0.011	0.02	0
	0.059	0		0.013	0.02	0
	0.049	0		0.013	0.02	0
	0.047	0		0.015	0.02	0
	0.044	0		0.017	0.03	0
	0.041	0		0.016	0.03	0
	0.037	0		0.016	0.03	0
	0.025	0		0.017	0.03	0
	0.024	0		0.018	0.03	0
	0.015	0		0.019	0.03	0
	0.02	0		0.02	0.03	0
	0.024	0		0.018	0.04	0
	0.034	0		0.018	0.04	0
	0.056	0		0.018	0.04	0
	0.058	0		0.02	0.03	0
	0.058	0		0.021	0.03	0
	0.06	0		0.026	0.03	0
	0.065	0		0.032	0.03	0
	0.069	0		0.034	0.03	0
	0.072	0		0.032	0.03	0
	0.077	0		0.032	0.03	0
	0.087	0		0.032	0.03	0
0	0.09	0		0.033	0.03	0
0.01	0.095	0		0.034	0.03	0
0.01	0.101	0		0.034	0.03	0
0.02	0.102	0		0.033	0.03	0
0.03	0.101	0		0.035	0.03	0
0.03	0.096	0		0.036	0.03	0
0.03	0.09	0		0.039	0.03	0
0.03	0.068	0		0.04	0.03	0
0.03	0.066	0		0.039	0.04	0
0.03	0.065	0		0.035	0.04	0
0.03	0.06	0		0.029	0.04	0
0.04	0.056	0		0.026	0.04	0
0.03	0.051	0		0.028	0.04	0
0.03	0.047	0		0.028	0.04	0
0.03	0.036	0		0.029	0.04	0
0.04	0.031	0		0.03	0.04	0
0.04	0.026	0		0.031	0.04	0
0.04	0.02	0		0.034	0.05	0
0.04	0.017	0		0.037	0.05	0
0.04	0.013	0		0.041	0.05	0
0.04	0.011	0		0.046	0.06	0
0.04	0.009	0		0.049	0.06	0
0.04	0.008	0		0.052	0.06	0
0.04	0.008	0		0.058	0.07	0
0.04	0.012	0		0.063	0.08	0
0.04	0.026	0		0.071	0.09	0
0.04	0.029	0		0.086	0.1	0
0.04	0.033	0		0.099	0.11	0
0.04	0.036	0		0.108	0.12	0
0.09	0.037	0		0.118	0.14	0
0.1	0.039	0		0.123	0.15	0
0.1	0.041	0		0.13	0.16	0
0.1	0.044	0		0.135	0.17	0
0.11	0.045	0		0.141	0.18	0
0.11	0.047	0		0.146	0.2	0
0.11	0.047	0		0.149	0.21	0
0.11	0.047	0		0.158	0.26	0
0.11	0.05	0		0.165	0.26	0
0.11	0.052	0		0.173	0.27	0
0.11	0.049	0		0.182	0.28	0
0.12	0.036	0		0.19	0.28	0
0.12	0.034	0		0.188	0.29	0
0.12	0.033	0		0.187	0.29	0
0.12	0.029	0		0.19	0.3	0
0.12	0.029	0		0.189	0.31	0
0.12	0.031	0		0.193	0.31	0
0.12	0.032	0		0.198	0.32	0
0.12	0.033	0		0.197	0.32	0
0.12	0.04	0		0.191	0.32	0
0.12	0.047	0		0.185	0.32	0
0.12	0.054	0		0.183	0.32	0
0.12	0.056	0		0.173	0.33	0
0.12	0.06	0		0.166	0.33	0
0.11	0.061	0		0.154	0.33	0
0.09	0.067	0		0.144	0.33	0
0.09	0.074	0		0.127	0.33	0
0.09	0.08	0		0.116	0.33	0
0.08	0.08	0		0.103	0.33	0
0.08	0.083	0		0.09	0.33	0
0.07	0.087	0		0.08	0.33	0
0.07	0.085	0		0.07	0.33	0
0.07	0.082	0		0.056	0.32	0
0.07	0.078	0		0.049	0.32	0
0.07	0.069	0		0.047	0.33	0
0.07	0.063	0		0.047	0.33	0
0.07	0.06	0		0.048	0.32	0
0.06	0.06	0		0.045	0.32	0
0.06	0.054	0		0.043	0.32	0
0.06	0.051	0		0.04	0.32	0
0.06	0.045	0		0.039	0.32	0
0.06	0.037	0		0.039	0.32	0
0.06	0.032	0		0.04	0.31	0
0.06	0.029	0		0.047	0.31	0
0.06	0.029	0		0.058	0.3	0
0.06	0.025	0		0.06	0.3	0
0.06	0.027	0		0.065	0.3	0
0.06	0.027	0		0.069	0.29	0
0.06	0.031	0		0.077	0.29	0
0.06	0.032	0		0.082	0.28	0
0.06	0.032	0		0.087	0.28	0
0.06	0.03	0		0.087	0.28	0
0.05	0.028	0		0.093	0.27	0
0.05	0.031	0		0.093	0.27	0
0.04	0.033	0		0.095	0.27	0
0.04	0.034	0		0.099	0.26	0
0.04	0.035	0		0.1	0.26	0
0.03	0.036	0		0.102	0.25	0
0.03	0.036	0		0.095	0.25	0
0.03	0.036	0		0.085	0.25	0
0.03	0.037	0		0.083	0.25	0
0.03	0.084	0		0.081	0.26	0
0.03	0.084	0		0.076	0.27	0
	0.084	0		0.069	0.26	0
	0.083	0		0.065	0.25	0
	0.081	0		0.064	0.25	0
	0.08	0		0.068	0.23	0
	0.08	0		0.068	0.22	0
	0.078	0		0.077	0.21	0
	0.076	0		0.08	0.21	0
	0.073	0		0.081	0.2	0
	0.071	0		0.081	0.2	0
	0.072	0		0.078	0.2	0
	0.071	0		0.078	0.2	0
	0.073	0		0.078	0.2	0
	0.072	0		0.082	0.21	0
	0.069	0		0.078	0.21	0
	0.02	0		0.078	0.21	0
	0.019	0		0.08	0.19	0
	0.017	0		0.078	0.2	0
	0.019	0		0.076	0.19	0
	0.023	0		0.068	0.2	0
	0.026	0		0.062	0.19	0
	0.028	0		0.058	0.18	0
	0.029	0		0.061	0.17	0
	0.034	0		0.067	0.16	0
	0.034	0		0.084	0.14	0
	0.037	0		0.103	0.12	0
	0.039	0		0.127	0.1	0
	0.038	0		0.147	0.08	0
	0.039	0		0.157	0.08	0
	0.039	0		0.167	0.08	0
	0.037	0		0.177	0.07	0
	0.037	0		0.18	0.07	0
	0.039	0		0.181	0.07	0
	0.038	0		0.178	0.08	0
	0.033	0		0.178	0.07	0
	0.03	0		0.176	0.07	0
	0.03	0		0.171	0.08	0
	0.03	0		0.165	0.08	0
	0.028	0		0.157	0.08	0
	0.023	0		0.146	0.09	0
	0.023	0		0.139	0.09	0
	0.019	0		0.121	0.1	0
	0.016	0		0.106	0.11	0
	0.016	0		0.094	0.11	0
	0.021	0		0.084	0.11	0
	0.027	0		0.076	0.1	0
	0.039	0		0.071	0.1	0
	0.054	0		0.069	0.1	0
	0.063	0		0.068	0.1	0
	0.069	0		0.068	0.1	0
	0.077	0		0.065	0.1	0
	0.082	0		0.063	0.1	0
	0.084	0		0.06	0.1	0
0.01	0.084	0		0.055	0.1	0
0.01	0.087	0		0.048	0.1	0
0.02	0.088	0		0.043	0.11	0
0.02	0.092	0		0.04	0.11	0
0.02	0.098	0		0.036	0.11	0
0.03	0.103	0		0.042	0.12	0
0.03	0.103	0		0.049	0.13	0
0.04	0.101	0		0.054	0.13	0
0.04	0.094	0		0.056	0.14	0
0.05	0.08	0		0.056	0.14	0
0.05	0.079	0		0.059	0.14	0
0.05	0.082	0		0.061	0.14	0
0.05	0.079	0		0.065	0.15	0
0.05	0.079	0		0.068	0.15	0
0.05	0.082	0		0.072	0.16	0
0.04	0.084	0		0.075	0.16	0
0.04	0.083	0		0.072	0.16	0
0.04	0.084	0		0.066	0.16	0
0.04	0.081	0		0.062	0.16	0
0.04	0.076	0		0.067	0.17	0
0.04	0.069	0		0.065	0.17	0
0.04	0.061	0		0.061	0.18	0
0.04	0.06	0		0.055	0.18	0
0.04	0.062	0		0.054	0.18	0
0.04	0.07	0		0.052	0.18	0
0.04	0.066	0		0.051	0.18	0
0.05	0.056	0		0.048	0.18	0
0.05	0.05	0		0.045	0.18	0
0.05	0.044	0		0.044	0.18	0
0.05	0.04	0		0.04	0.18	0
0.05	0.038	0		0.037	0.18	0
0.05	0.039	0		0.041	0.18	0
0.05	0.038	0		0.04	0.18	0
0.05	0.038	0		0.038	0.18	0
0.04	0.04	0		0.033	0.18	0
0.04	0.041	0		0.029	0.18	0
0.04	0.043	0		0.026	0.18	0
0.04	0.04	0		0.026	0.18	0
0.04	0.037	0		0.026	0.18	0
0.05	0.032	0		0.029	0.18	0
0.05	0.036	0		0.031	0.18	0
0.05	0.045	0		0.037	0.17	0
0.05	0.05	0		0.039	0.16	0
0.07	0.052	0		0.049	0.16	0
0.07	0.054	0		0.053	0.15	0
0.07	0.059	0		0.055	0.15	0
0.07	0.068	0		0.054	0.15	0
0	0.076	0		0.059	0.15	0
0	0.083	0		0.06	0.14	0
0	0.084	0		0.06	0.14	0
0.01	0.085	0		0.061	0.14	0
0.01	0.085	0		0.061	0.14	0
0.02	0.09	0		0.058	0.14	0
0.02	0.09	0		0.057	0.14	0
0.02	0.087	0		0.054	0.14	0
0.02	0.08	0		0.052	0.14	0
0.02	0.073	0		0.046	0.14	0
0.02	0.075	0		0.044	0.14	0
0.04	0.08	0		0.035	0.14	0
0.04	0.093	0		0.033	0.14	0
0.05	0.09	0		0.036	0.15	0
0.05	0.083	0		0.039	0.15	0
0.06	0.078	0		0.037	0.16	0
0.07	0.077	0		0.045	0.17	0
0.07	0.076	0		0.049	0.17	0
0.07	0.076	0		0.052	0.18	0
0.07	0.077	0		0.057	0.18	0
0.07	0.078	0		0.062	0.18	0
0.07	0.077	0		0.063	0.19	0
0.07	0.076	0		0.066	0.19	0
0.07	0.077	0		0.069	0.19	0
0.07	0.075	0		0.074	0.19	0
0.07	0.069	0		0.073	0.2	0
0.07	0.064	0		0.073	0.2	0
0.07	0.049	0		0.069	0.2	0
0.07	0.047	0		0.063	0.2	0
0.07	0.045	0		0.059	0.2	0
0.07	0.04	0		0.057	0.2	0
0.07	0.034	0		0.052	0.2	0
0.07	0.034	0		0.05	0.2	0
0.07	0.033	0		0.048	0.2	0
0.07	0.032	0		0.045	0.21	0
0.07	0.028	0		0.042	0.21	0
0.07	0.029	0		0.042	0.21	0
0.07	0.026	0		0.045	0.21	0
0.07	0.024	0		0.047	0.22	0
0.07	0.026	0		0.044	0.22	0
0.07	0.026	0		0.05	0.22	0
0.07	0.028	0		0.049	0.22	0
0.07	0.03	0		0.051	0.22	0
0.07	0.03	0		0.053	0.22	0
0.07	0.033	0		0.054	0.22	0
0.07	0.032	0		0.053	0.21	0
0.07	0.033	0		0.05	0.21	0
0.07	0.031	0		0.046	0.21	0
0.07	0.03	0		0.043	0.21	0
0.07	0.027	0		0.042	0.21	0
0.07	0.026	0		0.039	0.21	0
0.06	0.023	0		0.038	0.21	0
0.06	0.025	0		0.034	0.21	0
0.06	0.025	0		0.03	0.21	0
0.06	0.025	0		0.029	0.21	0
0.06	0.026	0		0.022	0.21	0
0.06	0.022	0		0.02	0.21	0
0.06	0.021	0		0.018	0.21	0
0.06	0.019	0		0.018	0.21	0
0.06	0.015	0		0.016	0.21	0
0.06	0.014	0		0.014	0.21	0
0.06	0.012	0		0.012	0.21	0
0.06	0.012	0		0.014	0.21	0
0.06	0.014	0		0.018	0.2	0
0.06	0.016	0		0.018	0.21	0
0.06	0.017	0		0.018	0.21	0
0.06	0.017	0		0.018	0.21	0
0.06	0.015	0		0.017	0.21	0
0.06	0.017	0		0.018	0.21	0
0.07	0.018	0		0.016	0.21	0
0.07	0.021	0		0.018	0.21	0
0.07	0.023	0		0.021	0.21	0
0.07	0.021	0		0.024	0.21	0
0.07	0.019	0		0.022	0.22	0
0.07	0.018	0		0.025	0.22	0
0.07	0.018	0		0.026	0.22	0
0.07	0.018	0		0.028	0.22	0
0.07	0.017	0		0.027	0.22	0
0.07	0.017	0		0.025	0.22	0
0.07	0.016	0		0.023	0.22	0
0.07	0.015	0		0.025	0.22	0
0.07	0.016	0		0.028	0.23	1
0.07	0.018	0		0.029	0.22	1
0.07	0.016	0		0.027	0.23	1
0.07	0.013	0		0.029	0.23	1
0.07	0.01	0		0.026	0.23	1
0.07	0.009	0		0.025	0.23	1
0.07	0.009	0		0.025	0.23	1
0.07	0.011	0		0.027	0.22	1
0.07	0.013	0		0.026	0.22	1
0.07	0.013	0		0.026	0.22	1
0.07	0.015	0		0.024	0.22	1
0.07	0.016	0		0.024	0.22	1
0.07	0.014	0		0.023	0.22	1
0.07	0.014	0		0.025	0.22	1
0.07	0.016	0		0.025	0.22	1
0.07	0.016	0		0.022	0.22	1
0.07	0.015	0		0.024	0.22	1
0.07	0.015	0		0.023	0.22	1
0.07	0.016	0		0.022	0.22	1
0.07	0.016	0		0.024	0.22	1
0.07	0.016	0		0.024	0.21	1
0.07	0.016	0		0.022	0.21	1
0.07	0.016	0		0.019	0.21	1
0.07	0.014	0		0.019	0.21	1
0.07	0.016	0		0.019	0.21	1
0.07	0.016	0		0.022	0.21	1
0.07	0.016	0		0.023	0.21	1
0.07	0.018	0		0.021	0.21	1
0.07	0.019	0		0.02	0.21	1
0.07	0.018	0		0.018	0.22	1
0.07	0.016	0		0.019	0.22	1
0.07	0.016	0		0.018	0.22	1
0.07	0.018	0		0.019	0.22	1
0.07	0.018	0		0.02	0.22	1
0.07	0.016	0		0.021	0.22	1
0.07	0.016	0		0.021	0.22	1
0.07	0.016	0		0.021	0.22	1
0.07	0.016	0		0.021	0.22	1
0.07	0.018	0		0.021	0.22	1
0.07	0.015	0		0.019	0.22	1
0.07	0.014	0		0.016	0.22	1
0.07	0.012	0		0.015	0.22	1
0.07	0.01	0		0.016	0.22	1
0.07	0.009	0		0.016	0.22	1
0.07	0.009	0		0.017	0.22	1
0.07	0.011	0		0.017	0.22	1
0.07	0.012	0		0.017	0.22	1
0.07	0.013	0		0.017	0.22	1
0.07	0.013	0		0.015	0.22	1
0.07	0.015	0		0.014	0.22	1
0.07	0.015	0		0.015	0.22	1
0.07	0.016	0		0.017	0.22	1
0.07	0.016	0		0.024	0.22	1
0.07	0.015	0		0.027	0.23	1
0.07	0.016	0		0.03	0.23	1
0.07	0.016	0		0.031	0.23	1
0.07	0.018	0		0.033	0.23	1
0.07	0.019	0		0.035	0.23	1
0.07	0.019	0		0.035	0.23	1
0.07	0.021	0		0.035	0.23	1
0.07	0.02	0		0.036	0.23	1
0.07	0.02	0		0.038	0.23	1
0.07	0.021	0		0.037	0.23	1
0.07	0.025	0		0.038	0.23	1
0.07	0.028	0		0.038	0.23	1
0.07	0.029	0		0.036	0.23	1
0.07	0.03	0		0.032	0.23	1
0.07	0.029	0		0.027	0.23	1
0.07	0.029	0		0.023	0.23	1
0.07	0.029	0		0.02	0.23	1
0.07	0.03	0		0.022	0.23	1
0.07	0.03	0		0.023	0.23	1
0.07	0.029	0		0.022	0.23	1
0.07	0.029	0		0.022	0.23	1
0.06	0.03	0		0.02	0.22	1
0.06	0.032	0		0.019	0.22	1
0.06	0.034	0		0.018	0.22	1
0.06	0.033	0		0.017	0.23	1
0.06	0.029	0		0.017	0.23	1
0.05	0.026	0		0.016	0.23	1
0.05	0.026	0		0.017	0.23	1
0.04	0.027	0		0.017	0.22	1
0.04	0.032	0		0.016	0.22	1
0.04	0.034	0		0.018	0.22	1
0.04	0.048	0		0.018	0.22	1
	0.062	0		0.017	0.22	1
	0.069	0		0.016	0.23	1
	0.071	0		0.015	0.22	1
	0.071	0		0.017	0.22	1
	0.072	0		0.018	0.22	1
	0.074	0		0.018	0.22	1
	0.072	0		0.018	0.22	1
	0.071	0		0.022	0.22	1
	0.07	0		0.024	0.22	1
	0.068	0		0.026	0.23	1
	0.065	0		0.028	0.23	1
	0.061	0		0.029	0.23	1
	0.057	0		0.031	0.23	1
	0.054	0		0.032	0.23	1
	0.041	0		0.034	0.23	1
	0.027	0		0.033	0.23	1
	0.018	0		0.032	0.23	1
	0.016	0		0.033	0.23	1
	0.016	0		0.032	0.23	1
0	0.013	0		0.035	0.23	1
0	0.009	0		0.039	0.24	1
0	0.007	0		0.041	0.23	1
0.01	0.008	0		0.038	0.23	1
0	0.009	0		0.037	0.23	1
0	0.009	0		0.034	0.23	1
0.01	0.011	0		0.03	0.23	1
0.01	0.011	0		0.029	0.23	1
0	0.011	0		0.027	0.23	1
0	0.011	0		0.026	0.23	1
0.01	0.01	0		0.026	0.23	1
0.01	0.008	0		0.026	0.23	1
0.01	0.008	0		0.027	0.23	1
0.01	0.01	0		0.03	0.23	1
0.01	0.01	0		0.027	0.23	1
0.01	0.008	0		0.024	0.23	1
0.01	0.008	0		0.018	0.23	1
0.01	0.008	0		0.016	0.23	1
0.01	0.006	0		0.016	0.23	1
0.01	0.005	0		0.016	0.23	1
0.01	0.005	0		0.016	0.23	1
0.01	0.003	0		0.016	0.23	1
0.01	0.003	0		0.017	0.23	1
0.01	0.003	0		0.017	0.23	1
0.01	0.003	0		0.016	0.23	1
0.01	0.003	0		0.015	0.23	1
0.01	0.003	0		0.014	0.23	1
0.01	0.003	0		0.011	0.23	1
0.01	0.002	0		0.01	0.23	1
0	0	0		0.015	0.23	1
0.01	0	0		0.013	0.23	1
0.01	0.002	0		0.015	0.23	1
0.01	0.002	0		0.015	0.23	1
0.01	0.003	0		0.014	0.23	1
0.01	0.003	0		0.013	0.23	1
0.01	0.005	0		0.014	0.23	1
0.01	0.005	0		0.015	0.22	1
0.01	0.005	0		0.015	0.22	1
0.01	0.006	0		0.016	0.22	1
0.01	0.006	0		0.017	0.22	1
0	0.006	0		0.02	0.22	1
0	0.008	0		0.022	0.22	1
0	0.009	0		0.023	0.22	1
0	0.009	0		0.023	0.21	1
0	0.009	0		0.022	0.21	1
0	0.009	0		0.024	0.21	1
0	0.007	0		0.024	0.21	1
0	0.007	0		0.026	0.21	1
0	0.006	0		0.026	0.21	1
0	0.006	0		0.028	0.21	1
0	0.005	0		0.028	0.21	1
0	0.005	0		0.029	0.21	1
0	0.005	0		0.029	0.21	1
0	0.003	0		0.027	0.21	1
0	0.003	0		0.027	0.21	1
0	0.003	0		0.024	0.21	1
0	0.001	0		0.023	0.21	1
0	0	0		0.023	0.21	1
0	0	0		0.022	0.21	1
0.01	0	0		0.02	0.21	1
0	0	0		0.02	0.21	1
0	0	0		0.019	0.21	1
0	0	0		0.019	0.21	1
0	0	0		0.023	0.21	1
0	0	0		0.023	0.21	1
0	0.002	0		0.023	0.21	1
0	0.002	0		0.021	0.21	1
0	0.002	0		0.019	0.21	1
0	0.005	0		0.021	0.21	1
0.01	0.005	0		0.022	0.21	1
0.01	0.005	0		0.024	0.21	1
0	0.006	0		0.024	0.21	1
0.01	0.008	0		0.025	0.21	1
0.01	0.008	0		0.026	0.21	1
0	0.008	0		0.027	0.21	1
0.01	0.008	0		0.028	0.22	1
0.01	0.008	0		0.03	0.22	1
0.01	0.01	0		0.03	0.22	1
0.01	0.012	0		0.029	0.22	1
0.01	0.014	0		0.028	0.22	1
0.01	0.012	0		0.028	0.22	1
0.01	0.014	0		0.029	0.22	1
0.01	0.015	0		0.03	0.22	1
0.01	0.014	0		0.03	0.22	1
0.01	0.016	0		0.028	0.22	1
0.01	0.016	0		0.026	0.22	1
0.01	0.016	0		0.026	0.22	1
0.01	0.016	0		0.03	0.22	1
0.01	0.018	0		0.032	0.23	1
0.01	0.018	0		0.034	0.23	1
0.01	0.019	0		0.034	0.23	1
0.01	0.021	0		0.033	0.24	1
0.01	0.022	0		0.032	0.24	1
0.01	0.022	0		0.031	0.23	1
0.01	0.022	0		0.045	0.22	1
0.01	0.024	0		0.058	0.21	1
0.01	0.025	0		0.064	0.2	1
0.01	0.026	0		0.066	0.2	1
0.01	0.024	0		0.07	0.19	1
0.01	0.021	0		0.071	0.19	1
0.01	0.021	0		0.073	0.19	1
0.01	0.02	0		0.071	0.19	1
0.01	0.018	0		0.07	0.2	1
0.01	0.016	0		0.066	0.2	1
0.01	0.016	0		0.063	0.2	1
0.01	0.016	0		0.062	0.2	1
0.01	0.016	0		0.064	0.21	1
0.01	0.015	0		0.066	0.21	1
0.01	0.016	0		0.065	0.21	1
0.01	0.015	0		0.051	0.21	1
0.01	0.014	0		0.038	0.21	1
0.01	0.014	0		0.03	0.21	1
0.01	0.014	0		0.029	0.21	1
0.01	0.018	0		0.023	0.21	1
0.01	0.029	0		0.025	0.21	1
0.01	0.035	0		0.027	0.22	1
0.01	0.037	0		0.032	0.23	1
0.01	0.04	0		0.029	0.23	1
0.01	0.041	0		0.031	0.23	1
0.01	0.043	0		0.031	0.23	1
0.04	0.043	0		0.031	0.23	1
0.05	0.045	0		0.03	0.23	1
0.05	0.043	0		0.03	0.22	1
0.05	0.041	0		0.029	0.22	1
0.05	0.04	0		0.03	0.22	1
0.05	0.04	0		0.032	0.22	1
0.05	0.038	0		0.032	0.22	1
0.05	0.038	0		0.032	0.22	1
0.05	0.033	0		0.032	0.22	1
0.05	0.024	0		0.031	0.22	1
0.05	0.019	0		0.029	0.22	1
0.05	0.019	0		0.025	0.22	1
0.05	0.016	0		0.025	0.22	1
0.06	0.016	0		0.024	0.22	1
0.06	0.02	0		0.024	0.22	1
0.06	0.025	0		0.024	0.22	1
0.06	0.027	0		0.021	0.22	1
0.07	0.029	0		0.019	0.22	1
0.07	0.029	0		0.02	0.22	1
0.07	0.03	0		0.022	0.22	1
0.07	0.034	0		0.021	0.22	1
0.07	0.035	0		0.023	0.22	1
0.07	0.036	0		0.023	0.22	1
0.07	0.039	0		0.023	0.22	1
0.07	0.04	0		0.021	0.22	1
0.07	0.04	0		0.019	0.22	1
0.07	0.041	0		0.02	0.22	1
0.07	0.041	0		0.02	0.21	1
0.07	0.039	0		0.02	0.21	1
0.07	0.034	0		0.02	0.22	1
0.07	0.029	0		0.02	0.22	1
0.07	0.023	0		0.02	0.22	1
0.07	0.021	0		0.02	0.22	1
0.07	0.021	0		0.019	0.22	1
0.07	0.021	0		0.015	0.22	1
0.07	0.019	0		0.016	0.22	1
0.07	0.017	0		0.017	0.22	1
0.07	0.014	0		0.017	0.22	1
0.07	0.013	0		0.017	0.22	1
0.07	0.013	0		0.018	0.22	1
0.07	0.011	0		0.02	0.22	1
0.07	0.01	0		0.019	0.22	1
0.07	0.012	0		0.02	0.22	1
0.07	0.013	0		0.02	0.22	1
0.07	0.013	0		0.021	0.22	1
0.07	0.012	0		0.021	0.22	1
0.07	0.013	0		0.021	0.22	1
0.07	0.013	0		0.022	0.22	1
0.07	0.013	0		0.021	0.22	1
0.07	0.012	0		0.019	0.22	1
0.07	0.01	0		0.019	0.22	1
0.07	0.01	0		0.019	0.22	1
0.07	0.01	0		0.02	0.22	1
0.07	0.008	0		0.021	0.22	1
0.07	0.006	0		0.021	0.22	1
0.07	0.008	0		0.021	0.22	1
0.07	0.006	0		0.022	0.21	1
0.07	0.006	0		0.02	0.21	1
0.07	0.005	0		0.02	0.21	1
0.07	0.005	0		0.02	0.21	1
0.07	0.005	0		0.02	0.22	1
0.07	0.003	0		0.022	0.22	1
0.07	0.005	0		0.023	0.22	1
0.07	0.005	0		0.024	0.22	1
0.07	0.006	0		0.026	0.22	1
0.07	0.008	0		0.026	0.22	1
0.07	0.011	0		0.025	0.22	1
0.07	0.015	0		0.024	0.22	1
0.07	0.017	0		0.025	0.23	1
0.07	0.019	0		0.026	0.23	1
0.07	0.019	0		0.026	0.23	1
0.07	0.021	0		0.024	0.23	1
0.05	0.023	0		0.026	0.23	1
0.05	0.027	0		0.025	0.23	1
0.05	0.028	0		0.024	0.23	1
0.05	0.031	0		0.023	0.23	1
0.05	0.031	0		0.021	0.23	1
0.05	0.031	0		0.02	0.23	1
0.04	0.031	0		0.018	0.23	1
0.04	0.03	0		0.016	0.23	1
0.04	0.028	0		0.016	0.23	1
0.04	0.026	0		0.016	0.23	1
0.04	0.023	0		0.016	0.23	1
0.04	0.021	0		0.016	0.23	1
0.04	0.021	0		0.015	0.23	1
0.04	0.023	0		0.016	0.23	1
0.04	0.024	0		0.018	0.22	1
0.03	0.025	0		0.016	0.22	1
0.03	0.029	0		0.017	0.22	1
0.03	0.033	0		0.018	0.22	1
0.03	0.037	0		0.019	0.22	1
0.03	0.04	0		0.02	0.22	1
0.02	0.039	0		0.02	0.22	1
0.02	0.04	0		0.02	0.22	1
0.02	0.043	0		0.02	0.22	1
0.02	0.045	0		0.019	0.22	1
0.03	0.043	0		0.019	0.22	1
0.03	0.043	0		0.019	0.22	1
0.03	0.043	0		0.019	0.21	1
0.03	0.041	0		0.017	0.21	1
0.03	0.037	0		0.017	0.21	1
0.03	0.034	0		0.015	0.21	1
0.03	0.031	0		0.015	0.21	1
0.03	0.025	0		0.015	0.21	1
0.03	0.021	0		0.015	0.21	1
0.03	0.015	0		0.014	0.21	1
0.03	0.012	0		0.013	0.21	1
0.03	0.016	0		0.013	0.21	1
0.02	0.017	0		0.016	0.21	1
0.02	0.016	0		0.018	0.22	1
0.02	0.015	0		0.02	0.22	1
0.02	0.015	0		0.02	0.22	1
0.02	0.019	0		0.02	0.22	1
0.02	0.022	0		0.021	0.22	1
0.02	0.026	0		0.021	0.22	1
0.02	0.026	0		0.021	0.22	1
0.02	0.027	0		0.026	0.21	1
0.02	0.027	0		0.029	0.21	1
	0.038	0		0.03	0.21	1
	0.049	0		0.028	0.21	1
	0.057	0		0.028	0.21	1
	0.06	0		0.028	0.21	1
	0.056	0		0.028	0.21	1
	0.06	0		0.028	0.21	1
	0.062	0		0.027	0.21	1
	0.066	0		0.025	0.21	1
	0.069	0		0.025	0.21	1
	0.069	0		0.026	0.21	1
	0.069	0		0.025	0.21	1
	0.074	0		0.025	0.21	1
	0.082	0		0.024	0.21	1
	0.086	0		0.023	0.21	1
	0.097	0		0.022	0.21	1
	0.099	0		0.019	0.21	1
	0.088	0		0.021	0.21	1
	0.076	0		0.022	0.21	1
	0.071	0		0.023	0.21	1
	0.069	0		0.023	0.21	1
	0.067	0		0.022	0.21	1
	0.063	0		0.024	0.22	1
	0.061	0		0.026	0.22	1
	0.056	0		0.026	0.22	1
	0.055	0		0.026	0.22	1
	0.051	0		0.025	0.22	1
	0.045	0		0.024	0.22	1
	0.036	0		0.024	0.22	1
	0.038	0		0.024	0.22	1
	0.027	0		0.024	0.23	1
	0.024	0		0.026	0.23	1
	0.024	0		0.031	0.23	1
	0.024	0		0.033	0.24	1
	0.027	0		0.032	0.24	1
	0.027	0		0.031	0.24	1
	0.03	0		0.03	0.24	1
	0.033	0		0.027	0.24	1
	0.036	0		0.025	0.24	1
	0.038	0		0.025	0.24	1
0.01	0.056	0		0.022	0.24	1
0.01	0.06	0		0.022	0.24	1
	0.063	0		0.024	0.24	1
	0.061	0		0.023	0.24	1
	0.057	0		0.022	0.24	1
0	0.059	0		0.021	0.24	1
0.01	0.067	0		0.02	0.24	1
0	0.07	0		0.018	0.24	1
	0.068	0		0.02	0.24	1
	0.069	0		0.022	0.24	1
	0.067	0		0.025	0.25	1
	0.065	0		0.028	0.25	1
	0.062	0		0.032	0.25	1
	0.058	0		0.036	0.26	1
	0.057	0		0.039	0.26	1
	0.036	0		0.043	0.26	1
	0.032	0		0.046	0.26	1
	0.027	0		0.05	0.26	1
	0.029	0		0.051	0.26	1
	0.028	0		0.051	0.26	1
	0.025	0		0.057	0.27	1
	0.016	0		0.064	0.27	1
	0.013	0		0.068	0.27	1
	0.015	0		0.073	0.27	1
	0.011	0		0.075	0.27	1
	0.013	0		0.078	0.27	1
	0.013	0		0.082	0.27	1
	0.011	0		0.085	0.28	1
	0.012	0		0.091	0.29	1
	0.016	0		0.093	0.28	1
	0.017	0		0.095	0.29	1
	0.019	0		0.094	0.29	1
	0.019	0		0.09	0.29	1
	0.021	0		0.089	0.29	1
	0.021	0		0.088	0.29	1
	0.022	0		0.084	0.29	1
	0.022	0		0.077	0.29	1
	0.024	0		0.069	0.29	1
	0.024	0		0.059	0.29	1
	0.026	0		0.059	0.3	1
	0.026	0		0.057	0.3	1
	0.026	0		0.056	0.31	1
	0.026	0		0.052	0.31	1
	0.024	0		0.044	0.31	1
	0.02	0		0.04	0.31	1
	0.02	0		0.037	0.31	1
	0.02	0		0.036	0.31	1
	0.021	0		0.036	0.31	1
	0.02	0		0.038	0.31	1
	0.018	0		0.041	0.31	1
	0.018	0		0.042	0.31	1
	0.021	0		0.045	0.31	1
	0.021	0		0.05	0.32	1
	0.02	0		0.052	0.32	1
	0.019	0		0.05	0.32	1
	0.021	0		0.045	0.32	1
	0.019	0		0.047	0.33	1
	0.02	0		0.046	0.33	1
	0.022	0		0.047	0.33	1
	0.022	0		0.045	0.33	1
	0.025	0		0.046	0.32	1
	0.025	0		0.063	0.31	1
	0.028	0		0.072	0.3	1
	0.034	0		0.075	0.3	1
	0.044	0		0.077	0.29	1
	0.043	0		0.078	0.28	1
	0.042	0		0.08	0.28	1
	0.041	0		0.077	0.27	1
	0.043	0		0.075	0.27	1
	0.04	0		0.076	0.27	1
	0.038	0		0.076	0.28	1
	0.04	0		0.071	0.28	1
	0.04	0		0.069	0.28	1
	0.038	0		0.067	0.28	1
	0.055	0		0.066	0.28	1
	0.055	0		0.062	0.28	1
	0.055	0		0.044	0.28	1
	0.055	0		0.034	0.28	1
	0.049	0		0.03	0.28	1
	0.039	0		0.026	0.28	1
	0.041	0		0.021	0.28	1
	0.042	0		0.015	0.28	1
0	0.047	0		0.013	0.28	1
0	0.049	0		0.012	0.27	1
0.01	0.053	0		0.011	0.27	1
0.01	0.053	0		0.01	0.27	1
0.01	0.053	0		0.012	0.27	1
0.01	0.053	0		0.013	0.27	1
0.01	0.055	0		0.015	0.27	1
0.01	0.043	0		0.016	0.27	1
0.01	0.043	0		0.017	0.27	1
0.01	0.04	0		0.019	0.27	1
0.01	0.038	0		0.023	0.28	1
0.01	0.036	0		0.028	0.28	1
0.01	0.037	0		0.035	0.29	1
0.01	0.039	0		0.051	0.3	1
0.01	0.038	0		0.068	0.3	1
0.01	0.035	0		0.082	0.3	1
0.01	0.044	0		0.093	0.29	1
0.03	0.055	0		0.109	0.29	1
0.03	0.054	0		0.121	0.28	1
0.03	0.053	0		0.13	0.28	1
0.03	0.053	0		0.145	0.27	1
0.03	0.053	0		0.161	0.26	1
0.03	0.054	0		0.178	0.25	1
0.03	0.053	0		0.193	0.23	1
0.03	0.056	0		0.225	0.22	1
0.03	0.066	0		0.238	0.21	1
0.03	0.075	0		0.245	0.21	1
0.03	0.081	0		0.251	0.2	1
0.08	0.082	0		0.245	0.19	1
0.08	0.084	0		0.245	0.17	1
0.08	0.084	0		0.245	0.16	1
0.08	0.07	0		0.254	0.14	1
0.08	0.057	0		0.264	0.11	1
0.08	0.055	0		0.273	0.1	1
0.08	0.056	0		0.282	0.08	1
0.08	0.056	0		0.283	0.06	1
0.08	0.056	0		0.277	0.05	1
0.08	0.055	0		0.266	0.04	1
0.08	0.055	0		0.253	0.04	1
0.1	0.056	0		0.223	0.04	1
0.1	0.057	0		0.207	0.04	1
0.1	0.05	0		0.192	0.04	1
0.11	0.041	0		0.178	0.04	1
0.11	0.04	0		0.169	0.05	1
0.11	0.037	0		0.153	0.05	1
0.11	0.038	0		0.141	0.04	1
0.11	0.037	0		0.122	0.04	1
0.11	0.037	0		0.096	0.04	1
0.11	0.039	0		0.075	0.04	1
0.12	0.042	0		0.055	0.03	1
0.13	0.048	0		0.037	0.04	1
0.14	0.057	0		0.025	0.04	1
0.15	0.069	0		0.019	0.04	1
0.17	0.078	0		0.016	0.04	1
0.18	0.082	0		0.016	0.04	1
0.2	0.089	0		0.018	0.04	1
0.21	0.102	0		0.021	0.04	1
0.22	0.116	0		0.023	0.03	1
0.22	0.124	0		0.025	0.03	1
0.24	0.131	0		0.025	0.03	1
0.24	0.135	0		0.024	0.03	1
0.24	0.14	0		0.023	0.03	1
0.24	0.144	0		0.023	0.03	1
0.25	0.142	0		0.023	0.04	1
0.25	0.139	0		0.023	0.04	1
0.25	0.133	0		0.024	0.04	1
0.24	0.123	0		0.025	0.04	1
0.24	0.111	0		0.028	0.04	1
0.23	0.102	0		0.03	0.03	1
0.24	0.092	0		0.034	0.03	1
0.24	0.076	0		0.036	0.03	1
0.24	0.062	0		0.038	0.03	1
0.24	0.049	0		0.041	0.03	1
0.24	0.042	0		0.041	0.03	1
0.24	0.042	1		0.042	0.03	1
0.24	0.035	1		0.044	0.02	1
0.24	0.032	1		0.049	0.02	1
0.24	0.029	1		0.051	0.02	1
0.24	0.026	1		0.053	0.02	1
0.24	0.025	1		0.056	0.02	1
0.24	0.025	1		0.08		1
0.24	0.025	1		0.08	0	1
0.25	0.023	1		0.082	0	1
0.25	0.023	1		0.081	0	1
0.25	0.021	1		0.078	0	1
0.25	0.021	1		0.072	0	1
0.25	0.021	1		0.072	0	0
0.24	0.02	1		0.071	0	0
0.24	0.02	1		0.068	0	0
0.25	0.021	1		0.065	0	0
0.25	0.024	1		0.065	0	0
0.25	0.022	1		0.063	0	0
0.25	0.022	1		0.062	0	0
0.25	0.02	1		0.058	0	0
0.25	0.024	1		0.056	0	0
0.25	0.025	1		0.052	0	0
0.25	0.027	1		0.048	0	0
0.25	0.035	1		0.023	0	0
0.25	0.04	1		0.021	0	0
0.25	0.043	1		0.018	0	0
0.24	0.046	1		0.018	0	0
0.24	0.046	1		0.017	0	0
0.24	0.05	1		0.017	0	0
0.24	0.054	1		0.017	0	0
0.24	0.055	1		0.016	0	0
0.24	0.055	1		0.013	0	0
0.24	0.057	1		0.015	0	0
0.24	0.058	1		0.014	0	0
0.24	0.066	1		0.014	0	0
0.24	0.076	1		0.013	0	0
0.26	0.079	1		0.014	0	0
0.26	0.08	1		0.016	0	0
0.26	0.075	1		0.016	0	0
0.26	0.071	1		0.014	0	0
0.26	0.068	1		0.014	0	0
0.26	0.063	1		0.014	0	0
0.26	0.063	1		0.014	0	0
0.26	0.06	1		0.012	0	0
0.25	0.06	1		0.01	0	0
0.26	0.064	1		0.008	0	0
0.26	0.067	1		0.009	0	0
0.25	0.069	1		0.01	0	0
0.25	0.072	1		0.01	0	0
0.25	0.072	1		0.01	0	0
0.25	0.072	1		0.01	0	0
0.25	0.079	1		0.01	0	0
0.25	0.08	1		0.009	0	0
0.25	0.086	1		0.009	0	0
0.25	0.091	1		0.009	0	0
0.25	0.101	1		0.009	0	0
0.25	0.113	1		0.009	0	0
0.25	0.121	1		0.009	0	0
0.25	0.127	1		0.01	0	0
0.25	0.128	1		0.011	0	0
0.25	0.122	1		0.012	0	0
0.25	0.117	1		0.011	0	0
0.25	0.115	1		0.008	0	0
0.25	0.113	1		0.008	0	0
0.25	0.107	1		0.007	0	0
0.25	0.103	1		0.007	0	0
0.25	0.093	1		0.006	0	0
0.26	0.093	1		0.006	0	0
0.26	0.089	1		0.006	0	0
0.26	0.087	1		0.008	0	0
0.26	0.075	1		0.009	0	0
0.26	0.066	1		0.01	0	0
0.26	0.057	1		0.011	0	0
0.26	0.049	1		0.012	0	0
0.26	0.043	1		0.01	0	0
0.26	0.043	1		0.01	0	0
0.26	0.043	1		0.012	0	0
0.26	0.044	1		0.012	0	0
0.26	0.042	1		0.013	0	0
0.26	0.041	1		0.013	0	0
0.26	0.044	1		0.015	0	0
0.26	0.042	1		0.015	0	0
0.26	0.046	1		0.017	0	0
0.24	0.044	1		0.018	0	0
0.23	0.042	1		0.017	0	0
0.23	0.04	1		0.017	0	0
0.23	0.043	1		0.017	0	0
0.2	0.048	1		0.016	0	0
0.19	0.056	1		0.014	0	0
0.19	0.065	1		0.014	0	0
0.18	0.075	1		0.017	0	0
0.17	0.085	1		0.017	0	0
0.17	0.099	1		0.017	0	0
0.17	0.108	1		0.016	0	0
0.17	0.112	1		0.017	0	0
0.17	0.114	1		0.02	0	0
0.14	0.111	1		0.024	0	0
0.13	0.108	1		0.024	0	0
0.13	0.11	1		0.024	0	0
0.13	0.115	1		0.024	0	0
0.12	0.113	1		0.023	0	0
0.12	0.112	1		0.021	0	0
0.13	0.105	1		0.022	0	0
0.13	0.1	1		0.024	0	0
0.14	0.095	1		0.025	0	0
0.14	0.09	1		0.022	0	0
0.14	0.084	1		0.023	0	0
0.16	0.075	1		0.024	0	0
0.16	0.072	1		0.024	0	0
0.16	0.07	1		0.023	0	0
0.16	0.077	1		0.02	0	0
0.18	0.091	1		0.014	0	0
0.18	0.106	1		0.012	0	0
0.2	0.121	1		0.011	0	0
0.21	0.129	1		0.011	0	0
0.22	0.142	1		0.011	0	0
0.23	0.154	1		0.011	0	0
0.23	0.169	1		0.011	0	0
0.24	0.174	1		0.012	0	0
0.24	0.181	1		0.012	0	0
0.25	0.183	1		0.013	0	0
0.25	0.185	1		0.012	0	0
0.26	0.192	1		0.012	0	0
0.27	0.198	1		0.012	0	0
0.27	0.205	1		0.015	0	0
0.27	0.198	1		0.014	0	0
0.27	0.18	1		0.014	0	0
0.28	0.163	1		0.016	0	0
0.28	0.146	1		0.016	0	0
0.28	0.135	1		0.016	0	0
0.3	0.129	1		0.016	0	0
0.3	0.116	1		0.016	0	0
0.3	0.105	1		0.015	0	0
0.3	0.095	1		0.014	0	0
0.3	0.085	1		0.012	0	0
0.3	0.08	1		0.01	0	0
0.29	0.072	1		0.011	0	0
0.29	0.058	1		0.011	0	0
0.29	0.046	1		0.009	0	0
0.29	0.034	1		0.006	0	0
0.29	0.027	1		0.005	0	0
0.29	0.025	1		0.005	0	0
0.29	0.024	1		0.004	0	0
0.29	0.022	1		0.004	0	0
0.29	0.02	1		0.006	0	0
0.29	0.013	1		0.014	0	0
0.29	0.011	1		0.016	0	0
0.29	0.009	1		0.015	0	0
0.29	0.011	1		0.019	0	0
0.29	0.014	1		0.025	0	0
0.29	0.013	1		0.027	0	0
0.29	0.015	1		0.029	0	0
0.29	0.015	1		0.03	0	0
0.29	0.015	1		0.033	0	0
0.29	0.017	1		0.033	0	0
0.29	0.017	1		0.035	0	0
0.29	0.019	1		0.038	0	0
0.29	0.018	1		0.038	0	0
0.29	0.018	1		0.038	0	0
0.29	0.016	1		0.037	0	0
0.29	0.016	1		0.03	0	0
0.29	0.017	1		0.028	0	0
0.29	0.017	1		0.028	0	0
0.29	0.017	1		0.024	0	0
0.29	0.016	1		0.018	0	0
0.29	0.016	1		0.018	0	0
0.29	0.015	1		0.015	0	0
0.29	0.017	1		0.013	0	0
0.29	0.017	1		0.012	0	0
0.29	0.017	1		0.013	0	0
0.3	0.017	1		0.012	0	0
0.29	0.017	1		0.009	0	0
0.29	0.017	1		0.01	0	0
0.29	0.018	1		0.011	0	0
0.29	0.018	1		0.011	0	0
0.29	0.017	1		0.01	0	0
0.29	0.017	1		0.011	0	0
0.29	0.017	1		0.011	0	0
0.29	0.016	1		0.011	0	0
0.29	0.016	1		0.01	0	0
0.29	0.017	1		0.008	0	0
0.3	0.017	1		0.008	0	0
0.3	0.015	1		0.008	0	0
0.29	0.014	1		0.009	0	0
0.29	0.012	1		0.007	0	0
0.3	0.012	1		0.009	0	0
0.3	0.01	1		0.009	0	0
0.29	0.013	1		0.007	0	0
0.29	0.014	1		0.006	0	0
0.29	0.016	1		0.006	0	0
0.29	0.017	1		0.006	0	0
0.29	0.016	1		0.005	0	0
0.28	0.016	1		0.005	0	0
0.28	0.017	1		0.005	0	0
0.28	0.016	1		0.007	0	0
0.29	0.014	1		0.008	0	0
0.29	0.014	1		0.008	0	0
0.29	0.022	1		0.007	0	0
0.31	0.025	1		0.006	0	0
0.31	0.029	1		0.006	0	0
0.31	0.031	1		0.004	0	0
0.31	0.033	1		0.004	0	0
0.31	0.031	1		0.004	0	0
0.31	0.028	1		0.005	0	0
0.31	0.029	1		0.007	0	0
0.3	0.032	1		0.008	0	0
0.3	0.036	1		0.01	0	0
0.3	0.034	1		0.011	0	0
0.29	0.034	1		0.012	0	0
0.29	0.036	1		0.012	0	0
0.29	0.036	1		0.012	0	0
0.29	0.035	1		0.012	0	0
0.29	0.028	1		0.011	0	0
0.29	0.027	1		0.011	0	0
0.29	0.023	1		0.011	0	0
0.29	0.022	1		0.013	0	0
0.29	0.022	1		0.015	0	0
0.29	0.022	1		0.015	0	0
0.3	0.027	1		0.017	0	0
0.3	0.032	1		0.017	0	0
0.3	0.033	1		0.017	0	0
0.3	0.035	1		0.018	0	0
0.3	0.037	1		0.017	0	0
0.3	0.039	1		0.018	0	0
0.31	0.043	1		0.018	0	0
0.31	0.047	1		0.017	0	0
0.31	0.052	1		0.019	0	0
0.31	0.058	1		0.022	0	0
0.31	0.059	1		0.026	0	0
0.31	0.063	1		0.027	0	0
0.31	0.074	1		0.028	0	0
0.31	0.082	1		0.025	0	0
0.31	0.087	1		0.026	0	0
0.29	0.085	1		0.023	0	0
0.29	0.08	1		0.023	0	0
0.29	0.075	1		0.023	0	0
0.29	0.073	1		0.022	0	0
0.29	0.076	1		0.023	0	0
0.29	0.079	1		0.021	0	0
0.29	0.082	1		0.022	0	0
0.29	0.091	1		0.022	0	0
0.29	0.102	1		0.02	0	0
0.29	0.107	1		0.017	0	0
0.29	0.121	1		0.012	0	0
0.29	0.13	1		0.011	0	0
0.24	0.13	1		0.009	0	0
0.24	0.13	1		0.01	0	0
0.25	0.132	1		0.011	0	0
0.25	0.138	1		0.011	0	0
0.25	0.139	1		0.011	0	0
0.25	0.139	1		0.011	0	0
0.25	0.137	1		0.01	0	0
0.25	0.133	1		0.008	0	0
0.25	0.13	1		0.007	0	0
0.25	0.13	1		0.006	0	0
0.25	0.127	1		0.007	0	0
0.25	0.121	1		0.007	0	0
0.25	0.129	1		0.007	0	0
0.23	0.124	1		0.008	0	0
0.24	0.12	1		0.008	0	0
0.24	0.113	1		0.008	0	0
0.24	0.106	1		0.007	0	0
0.25	0.098	1		0.007	0	0
0.25	0.092	1		0.008	0	0
0.25	0.091	1		0.007	0	0
0.25	0.091	1		0.007	0	0
0.25	0.089	1		0.009	0	0
0.25	0.09	1		0.01	0	0
0.25	0.09	1		0.013	0	0
0.25	0.085	1		0.013	0	0
0.25	0.078	1		0.011	0	0
0.25	0.069	1		0.011	0	0
0.25	0.051	1		0.011	0	0
0.25	0.041	1		0.011	0	0
0.25	0.031	1		0.013	0	0
0.25	0.027	1		0.014	0	0
0.25	0.025	1		0.014	0	0
0.25	0.027	1		0.014	0	0
0.25	0.026	1		0.014	0	0
0.25	0.029	1		0.017	0	0
0.25	0.029	1		0.017	0	0
0.25	0.031	1		0.016	0	0
0.25	0.032	1		0.014	0	0
0.25	0.03	1		0.012	0	0
0.25	0.03	1		0.013	0	0
0.25	0.026	1		0.014	0	0
0.25	0.025	1		0.015	0	0
0.25	0.025	1		0.017	0	0
0.25	0.025	1		0.017	0	0
0.25	0.025	1		0.017	0	0
0.25	0.026	1		0.016	0	0
0.25	0.032	1		0.017	0	0
0.25	0.045	1		0.019	0	0
0.25	0.054	1		0.017	0	0
0.25	0.053	1		0.028	0	0
0.25	0.054	1		0.028	0.02	0
0.25	0.053	1		0.081		0
0.23	0.049	1		0.081	0	0
0.23	0.048	1		0.081	0	0
0.23	0.045	1		0.082	0	0
0.23	0.047	1		0.086	0	0
0.23	0.047	1		0.086	0.02	0
0.23	0.045	1		0.086		0
0.23	0.044	1		0.086	0	0
0.23	0.044	1		0.085	0	0
0.23	0.041	1		0.088	0	0
0.23	0.035	1		0.09	0	0
0.23	0.02	1		0.088	0	0
0.23	0.009	1		0.148	0	0
0.23	0.006	1		0.148	0.02	0
0.23	0.006	1		0.175		0
0.23	0.007	1		0.175	0	0
0.23	0.008	1		0.177	0	0
0.23	0.008	1		0.177	0.02	0
0.23	0.008	1		0.174	0.02	0
0.24	0.007	1		0.175	0.02	0
0.24	0.007	1		0.161	0.02	0
0.24	0.007	1		0.107	0.02	0
0.24	0.007	1		0.108	0.02	0
0.24	0.007	1		0.109	0.02	0
0.24	0.008	1		0.106	0.02	0
0.24	0.012	1		0.105	0.02	0
0.24	0.014	1		0.105	0.02	0
0.24	0.017	1		0.101	0.02	0
0.21	0.024	1		0.098	0.02	0
0.22	0.029	1		0.098	0.02	0
0.22	0.034	1		0.036	0.02	0
0.22	0.044	1		0.009	0.02	0
0.21	0.052	1		0.006	0.02	0
0.21	0.059	1		0.006	0.02	0
0.21	0.061	1		0.006	0.02	0
0.21	0.063	1		0.005	0.02	0
0.21	0.063	1		0.006	0.02	0
0.21	0.063	1		0.004	0.02	0
0.21	0.063	1		0.004	0.02	0
0.21	0.062	1		0.003	0.02	0
0.21	0.058	1		0.003	0.02	0
0.21	0.056	1		0.003	0.02	0
0.21	0.053	1		0.003	0.02	0
0.21	0.044	1		0.003	0.02	0
0.21	0.038	1		0.003	0.02	0
0.21	0.031	1		0.003	0.02	0
0.21	0.019	1		0.003	0.02	0
0.21	0.011	1		0.006	0.02	0
0.21	0.004	1		0.006	0.02	0
0.21	0.004	1		0.011	0.02	0
0.21	0.005	1		0.016		0
0.21	0.007	1		0.016	0	0
0.2	0.008	1		0.033	0	0
0.2	0.012	1		0.033	0.02	0
0.2	0.013	1		0.033	0.02	0
0.2	0.018	1		0.032	0.02	0
0.2	0.026	1		0.034	0.02	0
0.2	0.036	1		0.034	0.02	0
0.2	0.05	1		0.034	0.02	0
0.16	0.061	1		0.05		0
0.15	0.075	1		0.05	0	0
0.15	0.082	1		0.053	0	0
0.13	0.094	1		0.055	0	0
0.13	0.1	1		0.057	0	0
0.13	0.104	1		0.059	0	0
0.12	0.114	1		0.058	0	0
0.12	0.128	1		0.061	0	0
0.12	0.139	1		0.062	0	0
0.09	0.15	1		0.056	0	0
0.08	0.164	1		0.041	0	0
0.08	0.169	1		0.055	0	0
0.08	0.168	1		0.058	0	0
0.08	0.166	1		0.059	0	0
0.08	0.163	1		0.066	0	0
0.08	0.157	1		0.071	0	0
0.08	0.15	1		0.062	0	0
0.08	0.158	1		0.087	0	0
0.02	0.162	1		0.087	0.02	0
0.02	0.17	1		0.087	0.02	0
0.02	0.169	1		0.086	0.02	0
0.02	0.157	1		0.085	0.02	0
0.02	0.145	1		0.104		0
0.02	0.137	1		0.104	0	0
0.02	0.131	1		0.12	0	0
0.02	0.123	1		0.12	0.02	0
0.02	0.119	1		0.136		0
0.02	0.114	1		0.136	0	0
0.02	0.11	1		0.139	0	0
0.02	0.103	1		0.138	0	0
0.02	0.101	1		0.124	0	0
0.01	0.098	1		0.123	0	0
0.01	0.085	1		0.121	0	0
0.01	0.071	1		0.115	0	0
0.01	0.059	1		0.109	0	0
0.01	0.054	1		0.105	0	0
0.01	0.052	1		0.076	0	0
0.02	0.052	1		0.074	0	0
0.03	0.049	1		0.074	0	0
0.03	0.045	1		0.073	0	0
0.03	0.039	1		0.052	0	0
0.03	0.036	1		0.033	0	0
0.03	0.033	1		0.013	0	0
0.03	0.031	1		0.012	0	0
0.03	0.029	1		0.011	0	0
0.03	0.025	1		0.011	0	0
0.03	0.022	1		0.011	0	0
0.03	0.02	1		0.011	0	0
0.03	0.018	1		0.01	0	0
0.03	0.017	1		0.01	0	0
0.03	0.021	1		0.01	0	0
0.03	0.026	1		0.012	0	0
0.03	0.025	1		0.012	0	0
0.03	0.024	1		0.014	0	0
0.03	0.022	1		0.013	0	0
0.03	0.023	1		0.013	0	0
0.03	0.02	1		0.013	0	0
0.03	0.02	1		0.015	0	0
0.03	0.018	1		0.017	0	0
0.03	0.016	1		0.017	0.02	0
0.03	0.016	1		0.015	0.02	0
0.04	0.016	1		0.016	0.02	0
0.04	0.018	1		0.014	0.02	0
0.04	0.023	1		0.013	0.02	0
0.04	0.027	1		0.015	0.02	0
0.04	0.026	1		0.015	0.02	0
0.04	0.028	1		0.014	0.02	0
0.04	0.033	1		0.012	0.02	0
0.04	0.034	1		0.013	0.02	0
0.07	0.036	1		0.012	0.02	0
0.07	0.037	1		0.013	0.02	0
0.07	0.04	1		0.014	0.02	0
0.07	0.043	1		0.015	0.02	0
0.07	0.045	1		0.011	0.02	0
0.07	0.052	1		0.009	0.02	0
0.07	0.054	1		0.009	0.02	0
0.07	0.056	1		0.008	0.02	0
0.07	0.059	1		0.009	0.02	0
0.07	0.056	1		0.01	0.02	0
0.07	0.054	1		0.009	0.02	0
0.07	0.052	1		0.01	0.02	0
0.07	0.047	1		0.01	0.02	0
0.07	0.041	1		0.01	0.02	0
0.07	0.04	1		0.009	0.02	0
0.07	0.038	1		0.011	0.02	0
0.07	0.035	1		0.011	0.02	0
0.07	0.034	1		0.01	0.02	0
0.07	0.03	1		0.009	0.02	0
0.07	0.029	1		0.009	0.02	0
0.07	0.025	1		0.009	0.02	0
0.07	0.023	1		0.009	0.02	0
0.07	0.023	1		0.009	0.02	0
0.07	0.018	1		0.008	0.02	0
0.07	0.019	1		0.008	0.02	0
0.07	0.02	1		0.007	0.02	0
0.07	0.02	1		0.006	0.02	0
0.07	0.018	1		0.007	0.02	0
0.07	0.019	1		0.006	0.02	0
0.07	0.017	1		0.007	0.02	0
0.07	0.017	1		0.006	0.02	0
0.07	0.017	1		0.005	0.02	0
0.07	0.016	1		0.006	0.02	0
0.06	0.016	1		0.009	0.02	0
0.06	0.016	1		0.01	0.02	0
0.06	0.015	1		0.011	0.02	0
0.06	0.015	1		0.013	0.02	0
0.06	0.013	1		0.014	0.02	0
0.06	0.013	1		0.016	0.02	0
0.06	0.011	1		0.016	0.02	0
0.06	0.011	1		0.017	0.02	0
0.06	0.009	1		0.017	0.02	0
0.06	0.011	1		0.017	0.02	0
0.06	0.011	1		0.049		0
0.06	0.012	1		0.049	0	0
0.06	0.01	1		0.048	0	0
0.06	0.012	1		0.047	0	0
0.06	0.013	1		0.047	0	0
0.06	0.013	1		0.047	0	0
0.06	0.013	1		0.045	0	0
0.06	0.011	1		0.046	0	0
0.06	0.011	1		0.048	0	0
0.06	0.011	1		0.047	0	0
0.06	0.011	1		0.047	0	0
0.06	0.013	1		0.045	0	0
0.06	0.012	1		0.045	0	0
0.06	0.014	1		0.044	0	0
0.06	0.014	1		0.044	0	0
0.06	0.012	1		0.045	0	0
0.06	0.013	1		0.016	0	0
0.06	0.017	1		0.015	0	0
0.06	0.017	1		0.018	0	0
0.06	0.017	1		0.018	0	0
0.06	0.018	1		0.018	0	0
0.06	0.02	1		0.084	0	0
0.06	0.023	1		0.084	0.02	0
0.06	0.028	1		0.082	0.02	0
0.06	0.031	1		0.08	0.02	0
0.06	0.033	1		0.078	0.02	0
0.06	0.033	1		0.077	0.02	0
0.06	0.032	1		0.077	0.02	0
0.05	0.034	1		0.08	0.02	0
0.05	0.06	1		0.082	0.02	0
0.05	0.071	1		0.082	0.02	0
0.15	0.082	1		0.084	0.02	0
0.15	0.091	1		0.082	0.02	0
0.17	0.102	1		0.084	0.02	0
0.18	0.11	1		0.081	0.02	0
0.18	0.113	1		0.081	0.02	0
0.18	0.115	1		0.081	0.02	0
0.19	0.117	1		0.014	0.02	0
0.2	0.12	1		0.015	0.02	0
0.21	0.125	1		0.016	0.02	0
0.21	0.133	1		0.017	0.02	0
0.22	0.138	1		0.018	0.02	0
0.22	0.139	1		0.017	0.02	0
0.22	0.138	1		0.014	0.02	0
0.22	0.112	1		0.014	0.02	0
0.22	0.102	1		0.015	0.02	0
0.22	0.091	1		0.012	0.02	0
0.22	0.081	1		0.013	0.02	0
0.22	0.069	1		0.013	0.02	0
0.22	0.065	1		0.013	0.02	0
0.22	0.069	1		0.013	0.02	0
0.22	0.071	1		0.012	0.02	0
0.24	0.074	1		0.012	0.02	0
0.24	0.069	1		0.011	0.02	0
0.24	0.065	1		0.009	0.02	0
0.24	0.058	1		0.009	0.02	0
0.24	0.051	1		0.008	0.02	0
0.24	0.049	1		0.008	0.02	0
0.24	0.049	1		0.01	0.02	0
0.23	0.049	1		0.01	0.02	0
0.23	0.053	1		0.008	0.02	0
0.25	0.055	1		0.008	0.02	0
0.25	0.062	1		0.009	0.02	0
0.25	0.062	1		0.007	0.02	0
0.26	0.058	1		0.008	0.02	0
0.26	0.052	1		0.008	0.02	0
0.26	0.048	1		0.008	0.02	0
0.26	0.042	1		0.008	0.02	0
0.26	0.042	1		0.008	0.02	0
0.26	0.04	1		0.009	0.02	0
0.26	0.04	1		0.01	0.02	0
0.27	0.04	1		0.01	0.02	0
0.27	0.04	1		0.009	0.02	0
0.27	0.039	1		0.007	0.02	0
0.27	0.042	1		0.007	0.02	0
0.27	0.037	1		0.008	0.02	0
0.27	0.036	1		0.008	0.02	0
0.27	0.029	1		0.007	0.02	0
0.26	0.033	1		0.008	0.02	0
0.25	0.045	1		0.007	0.02	0
0.22	0.06	1		0.007	0.02	0
0.22	0.066	1		0.009	0.02	0
0.22	0.066	1		0.01	0.02	0
0.22	0.067	1		0.011	0.02	0
0.21	0.069	1		0.011	0.02	0
0.21	0.069	1		0.012	0.02	0
0.21	0.07	1		0.013	0.02	0
0.21	0.07	1		0.014	0.02	0
0.21	0.073	1		0.016	0.02	0
0.21	0.072	1		0.016	0.02	0
0.21	0.074	1		0.015	0.02	0
0.2	0.074	1		0.016	0.02	0
0.2	0.074	1		0.016	0.02	0
0.2	0.068	1		0.016	0.02	0
0.2	0.055	1		0.018	0.02	0
0.2	0.039	1		0.018	0.02	0
0.2	0.031	1		0.018	0.02	0
0.2	0.031	1		0.016	0.02	0
0.2	0.026	1		0.016	0.02	0
0.2	0.025	1		0.016	0.02	0
0.2	0.023	1		0.016	0.02	0
0.21	0.023	1		0.016	0.02	0
0.21	0.021	1		0.015	0.02	0
0.21	0.016	1		0.013	0.02	0
0.21	0.013	1		0.015	0.02	0
0.21	0.012	1		0.015	0.02	0
0.21	0.01	1		0.015	0.02	0
0.21	0.009	1		0.013	0.02	0
0.21	0.011	1		0.012	0.02	0
0.21	0.013	1		0.011	0.02	0
0.21	0.014	1		0.009	0.02	0
0.21	0.016	1		0.008	0.02	0
0.21	0.016	1		0.009	0.02	0
0.21	0.016	1		0.01	0.02	0
0.21	0.019	1		0.009	0.02	0
0.21	0.025	1		0.008	0.02	0
0.21	0.029	1		0.007	0.02	0
0.21	0.034	1		0.06		0
0.2	0.042	1		0.06	0	0
0.2	0.047	1		0.059	0	0
0.2	0.05	1		0.059	0	0
0.2	0.053	1		0.058	0	0
0.2	0.057	1		0.06	0	0
0.2	0.06	1		0.062	0	0
0.2	0.062	1		0.064	0	0
0.2	0.065	1		0.065	0	0
0.2	0.066	1		0.065	0	0
0.18	0.066	1		0.064	0	0
0.18	0.068	1		0.066	0	0
0.18	0.064	1		0.064	0	0
0.18	0.058	1		0.066	0	0
0.18	0.052	1		0.067	0	0
0.18	0.048	1		0.068	0	0
0.18	0.041	1		0.016	0	0
0.18	0.036	1		0.018	0	0
0.18	0.035	1		0.017	0	0
0.18	0.033	1		0.019	0	0
0.18	0.029	1		0.016	0	0
0.18	0.025	1		0.036	0	0
0.18	0.026	1		0.036	0.02	0
0.18	0.026	1		0.035	0.02	0
0.16	0.031	1		0.033	0.02	0
0.16	0.03	1		0.033	0.02	0
0.16	0.03	1		0.033	0.02	0
0.15	0.032	1		0.031	0.02	0
0.15	0.032	1		0.031	0.02	0
0.15	0.034	1		0.031	0.02	0
0.15	0.034	1		0.031	0.02	0
0.15	0.034	1		0.03	0.02	0
0.15	0.036	1		0.029	0.02	0
0.16	0.036	1		0.028	0.02	0
0.16	0.036	1		0.03	0.02	0
0.16	0.04	1		0.03	0.02	0
0.16	0.04	1		0.032	0.02	0
0.16	0.039	1		0.01	0.02	0
0.15	0.037	1		0.011	0.02	0
0.15	0.034	1		0.013	0.02	0
0.15	0.032	1		0.014	0.02	0
0.15	0.031	1		0.016	0.02	0
0.15	0.031	1		0.017	0.02	0
0.14	0.037	1		0.019	0.02	0
0.13	0.045	1		0.018	0.02	0
0.12	0.058	1		0.019	0.02	0
0.12	0.067	1		0.021	0.02	0
0.12	0.074	1		0.022	0.02	0
0.12	0.079	1		0.022	0.02	0
0.12	0.083	1		0.022	0.02	0
0.12	0.083	1		0.022	0.02	0
0.12	0.083	1		0.021	0.02	0
0.09	0.089	1		0.021	0.02	0
0.09	0.09	1		0.02	0.02	0
0.09	0.089	1		0.02	0.02	0
0.09	0.093	1		0.019	0.02	0
0.09	0.091	1		0.018	0.02	0
0.09	0.089	1		0.017	0.02	0
0.09	0.085	1		0.017	0.02	0
0.08	0.081	1		0.016	0.02	0
0.08	0.072	1		0.015	0.02	0
0.08	0.065	1		0.013	0.02	0
0.08	0.059	1		0.013	0.02	0
0.08	0.053	1		0.012	0.02	0
0.08	0.049	1		0.01	0.02	0
0.08	0.051	1		0.01	0.02	0
0.08	0.051	1		0.01	0.02	0
0.08	0.045	1		0.01	0.02	0
0.07	0.043	1		0.012	0.02	0
0.07	0.045	1		0.01	0.02	0
0.07	0.048	1		0.01	0.02	0
0.07	0.056	1		0.009	0.02	0
0.08	0.068	1		0.01	0.02	0
0.08	0.077	1		0.01	0.02	0
0.08	0.075	1		0.009	0.02	0
0.09	0.073	1		0.009	0.02	0
0.09	0.077	1		0.01	0.02	0
0.09	0.08	1		0.01	0.02	0
0.1	0.091	1		0.012	0.02	0
0.1	0.101	1		0.013	0.02	0
0.1	0.112	1		0.013	0.02	0
0.1	0.119	1		0.013	0.02	0
0.1	0.127	1		0.013	0.02	0
0.1	0.125	1		0.013	0.02	0
0.1	0.123	1		0.015	0.02	0
0.1	0.119	1		0.015	0.02	0
0.19	0.113	1		0.016	0.02	0
0.18	0.102	1		0.017	0.02	0
0.18	0.092	1		0.017	0.02	0
0.18	0.091	1		0.018	0.02	0
0.18	0.092	1		0.018	0.02	0
0.18	0.088	1		0.019	0.02	0
0.17	0.084	1		0.02	0.02	0
0.18	0.074	1		0.022	0.02	0
0.18	0.065	1		0.021	0.02	0
0.18	0.053	1		0.019	0.02	0
0.18	0.044	1		0.02	0.02	0
0.18	0.034	1		0.02	0.02	0
0.18	0.032	1		0.019	0.02	0
0.18	0.03	1		0.018	0.02	0
0.18	0.029	1		0.019	0.02	0
0.18	0.028	1		0.018	0.02	0
0.18	0.026	1		0.016	0.02	0
0.18	0.028	1		0.017	0.02	0
0.18	0.026	1		0.017	0.02	0
0.18	0.024	1		0.017	0.02	0
0.18	0.023	1		0.016	0.02	0
0.18	0.025	1		0.015	0.02	0
0.18	0.031	1		0.014	0.02	0
0.18	0.032	1		0.015	0.02	0
0.18	0.034	1		0.016	0.02	0
0.19	0.032	1		0.015	0.02	0
0.19	0.032	1		0.015	0.02	0
0.19	0.034	1		0.016	0.02	0
0.19	0.036	1		0.016	0.02	0
0.19	0.036	1		0.014	0.02	0
0.19	0.036	1		0.014	0.02	0
0.19	0.037	1		0.015	0.02	0
0.19	0.041	1		0.015	0.02	0
0.19	0.042	1		0.013	0.02	0
0.19	0.041	1		0.013	0.02	0
0.19	0.044	1		0.013	0.02	0
0.2	0.044	1		0.013	0.02	0
0.2	0.041	1		0.011	0.02	0
0.2	0.037	1		0.01	0.02	0
0.21	0.037	1		0.01	0.02	0
0.21	0.042	1		0.01	0.02	0
0.21	0.047	1		0.01	0.02	0
0.21	0.054	1		0.01	0.02	0
0.21	0.058	1		0.012	0.02	0
0.21	0.061	1		0.012	0.02	0
0.21	0.06	1		0.013	0.02	0
0.21	0.061	1		0.012	0.02	0
0.21	0.058	1		0.011	0.02	0
0.21	0.064	1		0.011	0.02	0
0.25	0.071	1		0.01	0.02	0
0.25	0.075	1		0.009	0.02	0
0.25	0.077	1		0.008	0.02	0
0.25	0.076	1		0.008	0.02	0
0.25	0.077	1		0.008	0.02	0
0.25	0.073	1		0.006	0.02	0
0.25	0.07	1		0.008	0.02	0
0.25	0.067	1		0.007	0.02	0
0.25	0.06	1		0.008	0.02	0
0.25	0.054	1		0.007	0.02	0
0.25	0.054	1		0.009	0.02	0
0.25	0.052	1		0.01	0.02	0
0.25	0.052	1		0.011	0.02	0
0.25	0.049	1		0.012	0.02	0
0.25	0.041	1		0.014	0.02	0
0.25	0.035	1		0.016	0.02	0
0.25	0.029	1		0.017	0.02	0
0.25	0.031	1		0.017	0.02	0
0.25	0.036	1		0.019	0.02	0
0.24	0.037	1		0.02	0.02	0
0.23	0.037	1		0.021	0.02	0
0.23	0.038	1		0.02	0.02	0
0.23	0.037	1		0.019	0.02	0
0.23	0.038	1		0.017	0.02	0
0.22	0.042	1		0.017	0.02	0
0.22	0.042	1		0.016	0.02	0
0.22	0.044	1		0.015	0.02	0
0.22	0.044	1		0.015	0.02	0
0.22	0.044	1		0.015	0.02	0
0.22	0.045	1		0.015	0.02	0
0.22	0.045	1		0.014	0.02	0
0.22	0.042	1		0.013	0.02	0
0.21	0.038	1		0.013	0.02	0
0.21	0.035	1		0.012	0.02	0
0.21	0.044	1		0.011	0.02	0
0.21	0.061	1		0.011	0.02	0
0.21	0.076	1		0.011	0.02	0
0.22	0.09	1		0.011	0.02	0
0.22	0.098	1		0.012	0.02	0
0.22	0.104	1		0.012	0.02	0
0.23	0.108	1		0.014	0.02	0
0.23	0.106	1		0.014	0.02	0
0.23	0.11	1		0.013	0.02	0
0.23	0.113	1		0.012	0.02	0
0.23	0.114	1		0.01	0.02	0
0.23	0.114	1		0.012	0.02	0
0.23	0.112	1		0.011	0.02	0
0.23	0.109	1		0.011	0.02	0
0.23	0.106	1		0.012	0.02	0
0.24	0.095	1		0.014	0.02	0
0.24	0.076	1		0.014	0.02	0
0.24	0.06	1		0.016	0.02	0
0.24	0.045	0		0.016	0.02	0
0.24	0.034	0		0.017	0.02	0
0.24	0.024	0		0.017	0.02	0
0.24	0.018	0		0.016	0.02	0
0.24	0.019	0		0.017	0.02	0
0.23	0.017	0		0.018	0.02	0
0.22	0.018	0		0.017	0.02	0
0.21	0.018	0		0.018	0.02	0
0.21	0.016	0		0.018	0.02	0
0.21	0.016	0		0.019	0.02	0
0.21	0.018	0		0.019	0.02	0
0.21	0.015	0		0.019	0.02	0
0.21	0.013	0		0.019	0.02	0
0.21	0.013	0		0.019	0.02	0
0.21	0.013	0		0.019	0.02	0
0.21	0.015	0		0.019	0.02	0
0.21	0.017	0		0.018	0.02	0
0.21	0.018	0		0.017	0.02	0
0.21	0.018	0		0.018	0.02	0
0.2	0.02	0		0.018	0.02	0
0.19	0.023	0		0.018	0.02	0
0.18	0.027	0		0.018	0.02	0
0.16	0.038	0		0.018	0.02	0
0.15	0.056	0		0.018	0.02	0
0.13	0.074	0		0.017	0.02	0
0.12	0.085	0		0.017	0.02	0
0.11	0.093	0		0.015	0.02	0
0.1	0.101	0		0.014	0.02	0
0.1	0.108	0		0.012	0.02	0
0.1	0.114	0		0.012	0.02	0
0.09	0.116	0		0.013	0.02	0
0.09	0.117	0		0.013	0.02	0
0.09	0.117	0		0.012	0.02	0
0.08	0.121	0		0.01	0.02	0
0.08	0.121	0		0.01	0.02	0
0.08	0.121	0		0.01	0.02	0
0.08	0.12	0		0.011	0.02	0
0.08	0.115	0		0.011	0.02	0
0.07	0.099	0		0.009	0.02	0
0.07	0.083	0		0.011	0.02	0
0.07	0.071	0		0.01	0.02	0
0.07	0.064	0		0.011	0.02	0
0.07	0.058	0		0.011	0.02	0
0.07	0.054	0		0.011	0.02	0
0.07	0.048	0		0.011	0.02	0
0.07	0.049	0		0.01	0.02	0
0.07	0.054	0		0.01	0.02	0
0.06	0.062	0		0.011	0.02	0
0.06	0.065	0		0.012	0.02	0
0.06	0.065	0		0.012	0.02	0
0.06	0.068	0		0.011	0.02	0
0.06	0.068	0		0.011	0.02	0
0.06	0.062	0		0.011	0.02	0
0.06	0.061	0		0.011	0.02	0
0.05	0.063	0		0.009	0.02	0
0.05	0.063	0		0.009	0.02	0
0.06	0.063	0		0.007	0.02	0
0.07	0.063	0		0.008	0.02	0
0.07	0.061	0		0.01	0.02	0
0.07	0.059	0		0.01	0.02	0
0.07	0.054	0		0.01	0.02	0
0.07	0.046	0		0.01	0.02	0
0.07	0.036	0		0.009	0.02	0
0.07	0.029	0		0.008	0.02	0
0.07	0.027	0		0.007	0.02	0
0.07	0.021	0		0.008	0.02	0
0.07	0.017	0		0.008	0.02	0
0.07	0.017	0		0.009	0.02	0
0.07	0.022	0		0.01	0.02	0
0.07	0.024	0		0.011	0.02	0
0.07	0.03	0		0.011	0.02	0
0.07	0.032	0		0.013	0.02	0
0.06	0.034	0		0.011	0.02	0
0.05	0.038	0		0.011	0.02	0
0.04	0.041	0		0.009	0.02	0
0.04	0.045	0		0.009	0.02	0
0.04	0.049	0		0.011	0.02	0
0.04	0.059	0		0.011	0.02	0
0	0.073	0		0.011	0.02	0
	0.077	0		0.011	0.02	0
	0.078	0		0.011	0.02	0
	0.079	0		0.011	0.02	0
	0.077	0		0.01	0.02	0
	0.072	0		0.009	0.02	0
	0.069	0		0.009	0.02	0
	0.065	0		0.009	0.02	0
0	0.065	0		0.009	0.02	0
	0.064	0		0.009	0.02	0
0	0.059	0		0.01	0.02	0
	0.057	0		0.013	0.02	0
	0.055	0		0.014	0.02	0
	0.05	0		0.013	0.02	0
	0.042	0		0.03		0
	0.029	0		0.03	0	0
	0.024	0		0.031	0	0
	0.024	0		0.034	0	0
	0.02	0		0.034	0	0
	0.022	0		0.033	0	0
	0.021	0		0.034	0	0
	0.021	0		0.034	0	0
	0.021	0		0.033	0	0
	0.026	0		0.034	0	0
	0.032	0		0.034	0	0
0.01	0.034	0		0.037	0	0
0.01	0.034	0		0.035	0	0
0.01	0.034	0		0.033	0	0
0	0.036	0		0.031	0	0
0.01	0.039	0		0.032	0	0
0.01	0.043	0		0.017	0	0
0.01	0.043	0		0.017	0	0
0	0.041	0		0.016	0	0
	0.042	0		0.017	0	0
	0.043	0		0.018	0	0
	0.045	0		0.017	0	0
	0.055	0		0.018	0	0
	0.083	0		0.018	0	0
0.01	0.089	0		0.018	0	0
0.01	0.087	0		0.018	0	0
0.02	0.089	0		0.016	0	0
0.03	0.089	0		0.018	0	0
0.04	0.092	0		0.019	0	0
0.04	0.092	0		0.021	0	0
0.05	0.089	0		0.019	0	0
0.05	0.105	0		0.019	0	0
0.05	0.107	0		0.018	0	0
0.06	0.11	0		0.016	0	0
0.06	0.11	0		0.014	0	0
0.06	0.112	0		0.013	0	0
0.07	0.111	0		0.015	0	0
0.07	0.103	0		0.015	0	0
0.07	0.075	0		0.017	0	0
0.07	0.062	0		0.017	0	0
0.07	0.056	0		0.015	0	0
0.07	0.052	0		0.014	0	0
0.07	0.051	0		0.013	0	0
0.07	0.046	0		0.013	0	0
0.07	0.046	0		0.013	0	0
0.07	0.046	0		0.015	0	0
0.07	0.026	0		0.015	0	0
0.07	0.022	0		0.016	0	0
0.07	0.019	0		0.016	0	0
0.07	0.018	0		0.016	0	0
0.07	0.014	0		0.015	0	0
0.07	0.011	0		0.014	0	0
0.07	0.007	0		0.013	0	0
0.07	0.005	0		0.012	0	0
0.07	0.004	0		0.012	0	0
0.07	0.005	0		0.012	0	0
0.07	0.007	0		0.013	0	0
0.07	0.007	0		0.015	0	0
0.07	0.007	0		0.014	0	0
0.07	0.005	0		0.014	0	0
0.07	0.005	0		0.013	0	0
0.07	0.006	0		0.012	0	0
0.07	0.006	0		0.01	0	0
0.07	0.006	0		0.01	0	0
0.07	0.009	0		0.01	0	0
0.07	0.009	0		0.011	0	0
0.07	0.01	0		0.011	0	0
0.07	0.01	0		0.011	0	0
0.07	0.01	0		0.014	0	0
0.07	0.012	0		0.015	0	0
0.07	0.012	0		0.017	0	0
0.07	0.012	0		0.015	0	0
0.07	0.015	0		0.018	0	0
0.07	0.017	0		0.018	0.02	0
0.07	0.019	0		0.019		0
0.07	0.019	0		0.019	0	0
0.07	0.02	0		0.017	0	0
0.07	0.022	0		0.026	0	0
0.07	0.027	0		0.026	0.02	0
0.04	0.028	0		0.026	0.02	0
0.04	0.032	0		0.027	0.02	0
0.04	0.033	0		0.027	0.02	0
0.04	0.037	0		0.03		0
0.03	0.039	0		0.03	0	0
0.03	0.047	0		0.029	0	0
0.03	0.052	0		0.039	0	0
0.02	0.054	0		0.039	0.02	0
0.01	0.057	0		0.039	0.02	0
0.01	0.063	0		0.037	0.02	0
0.01	0.069	0		0.034	0.02	0
0.03	0.075	0		0.032	0.02	0
0.03	0.084	0		0.032	0.02	0
0.03	0.088	0		0.029	0.02	0
0.03	0.088	0		0.029	0.02	0
0	0.087	0		0.029	0.02	0
0	0.093	0		0.021	0.02	0
	0.098	0		0.023	0.02	0
	0.097	0		0.022	0.02	0
	0.097	0		0.022	0.02	0
	0.1	0		0.019	0.02	0
	0.092	0		0.019	0.02	0
	0.086	0		0.007		0
	0.082	0		0.007	0	0
	0.077	0		0.009	0	0
	0.07	0		0.011	0	0
	0.063	0		0.013	0	0
	0.056	0		0.016	0	0
	0.047	0		0.017	0	0
	0.042	0		0.017	0	0
	0.038	0		0.017	0	0
	0.028	0		0.017	0	0
	0.028	0		0.017	0	0
	0.028	0		0.017	0	0
	0.028	0		0.017	0	0
	0.025	0		0.019	0	0
	0.03	0		0.019	0	0
	0.034	0		0.019	0	0
	0.037	0		0.019	0	0
	0.041	0		0.017	0	0
	0.039	0		0.017	0	0
	0.04	0		0.016	0	0
	0.043	0		0.016	0	0
	0.043	0		0.015	0	0
	0.044	0		0.015	0	0
	0.045	0		0.012	0	0
	0.049	0		0.014	0	0
	0.041	0		0.012	0	0
	0.044	0		0.012	0	0
	0.043	0		0.014	0	0
	0.044	0		0.012	0	0
	0.04	0		0.012	0	0
	0.037	0		0.014	0	0
	0.035	0		0.012	0	0
	0.033	0		0.012	0	0
	0.035	0		0.011	0	0
	0.036	0		0.009	0	0
	0.035	0		0.009	0	0
	0.036	0		0.008	0	0
	0.035	0		0.008	0	0
	0.036	0		0.008	0	0
	0.036	0		0.008	0	0
	0.04	0		0.01	0	0
	0.04	0		0.009	0	0
	0.038	0		0.008	0	0
	0.036	0		0.01	0	0
	0.033	0		0.011	0	0
	0.033	0		0.011	0	0
	0.032	0		0.011	0	0
	0.03	0		0.012	0	0
	0.028	0		0.013	0	0
	0.025	0		0.015	0	0
	0.022	0		0.014	0	0
	0.019	0		0.015	0	0
	0.02	0		0.016	0	0
	0.019	0		0.018	0	0
	0.019	0		0.016	0	0
	0.037	0		0.015	0	0
	0.038	0		0.017	0	0
	0.04	0		0.018	0	0
	0.044	0		0.018	0	0
	0.049	0		0.02	0	0
	0.049	0		0.018	0	0
	0.055	0		0.021	0	0
	0.056	0		0.019	0	0
	0.058	0		0.018	0	0
	0.058	0		0.018	0	0
	0.058	0		0.017	0	0
	0.06	0		0.017	0	0
	0.06	0		0.017	0	0
	0.06	0		0.015	0	0
	0.061	0		0.015	0	0
	0.041	0		0.015	0	0
	0.046	0		0.013	0	0
	0.049	0		0.012	0	0
	0.044	0		0.012	0	0
	0.045	0		0.01	0	0
	0.045	0		0.013	0	0
	0.041	0		0.011	0	0
	0.041	0		0.013	0	0
	0.039	0		0.013	0	0
	0.039	0		0.011	0	0
	0.044	0		0.011	0	0
	0.044	0		0.011	0	0
	0.044	0		0.011	0	0
	0.049	0		0.011	0	0
	0.048	0		0.011	0	0
	0.052	0		0.012	0	0
	0.053	0		0.013	0	0
	0.073	0		0.014	0	0
	0.084	0		0.016	0	0
	0.093	0		0.015	0	0
	0.093	0		0.013	0	0
	0.106	0		0.012	0	0
	0.113	0		0.012	0	0
0.05	0.117	0		0.012	0	0
0.07	0.125	0		0.014	0	0
0.07	0.136	0		0.016	0	0
0.07	0.14	0		0.017	0	0
0.07	0.143	0		0.017	0	0
0.07	0.144	0		0.017	0	0
0.07	0.139	0		0.017	0	0
0.07	0.137	0		0.016	0	0
0.07	0.134	0		0.016	0	0
0.07	0.125	0		0.016	0	0
0.07	0.103	0		0.013	0	0
0.07	0.097	0		0.013	0	0
0.07	0.083	0		0.014	0	0
0.07	0.07	0		0.015	0	0
0.07	0.064	0		0.015	0	0
0.07	0.06	0		0.018	0	0
0.07	0.054	0		0.016	0	0
0.07	0.043	0		0.014	0	0
0.07	0.037	0		0.013	0	0
0.07	0.033	0		0.013	0	0
0.07	0.03	0		0.013	0	0
0.07	0.031	0		0.014	0	0
0.07	0.032	0		0.014	0	0
0.07	0.03	0		0.014	0	0
0.07	0.028	0		0.014	0	0
0.08	0.029	0		0.014	0	0
0.08	0.031	0		0.014	0	0
0.08	0.035	0		0.012	0	0
0.08	0.037	0		0.012	0	0
0.08	0.04	0		0.01	0	0
0.08	0.04	0		0.01	0	0
0.08	0.04	0		0.01	0	0
[truncated: 1,527 more rows]
