# Supplementary material for: Hippocampal-hypothalamic circuit controls context-dependent innate defensive responses
Source: eLife. 2022 Apr 14;11:e74736. doi: 10.7554/eLife.74736 (PMC9042231; doi:10.7554/eLife.74736)
Supplement: Figure 8—figure supplement 1—source data 1. — Mice display shelter-directed escape or freezing depending on the shelter availability. [file elife-74736-fig8-figsupp1-data1.xlsx]

## Sheet: ED Fig 10A
Normalized distance	Speed (pix/s)
0.939016	8.76538
0.947786	9.7021
0.960471	7.76491
0.968143	6.95028
0.96691	5.71643
0.954112	7.46792
0.93476	9.74359
0.887766	17.8242
0.843387	16.3654
0.79544	18.3035
0.758503	13.919
0.706543	20.7964
0.651665	20.7573
0.581283	27.4613
0.503801	30.5437
0.435496	27.2921
0.36567	28.3866
0.298148	25.6572
0.240464	22.023
0.168804	26.887
0.102524	24.8899
0.060352	16.1046
0.0502894	5.1292
0.0411138	3.43962
0.032944	3.01789
0.0283916	2.34494
0.0259276	1.83229
0.017975	3.57717
0.0199162	7.37625
0.0205583	2.05871
0.0189538	0.591275
0.0170661	2.38867
0.012711	4.24609
0.0201044	3.60855
0.0240688	1.80411
0.0276007	1.30386
0.028223	0.27845
0.0292874	0.626716
0.0303813	0.917512
0.832778		12.8111
0.789991		13.2317
0.746659		13.2784
0.677705		20.5022
0.595343		24.1596
0.51418		23.8139
0.420603		27.4681
0.333435		25.5671
0.24139		27.0733
0.16123		23.7034
0.110589		15.457
0.0844857		8.23178
0.0752661		2.70357
0.0641427		3.40182
0.0557752		3.75147
0.0517869		3.09654
0.0371058		7.44684
0.0388336		4.5763
0.0525019		10.5999
0.0599106		2.29189
0.0618557		0.936875
0.0622539		0.262491
0.0642975		0.724098
0.0655081		0.356329
0.0636506		0.602518
0.0636506		0
0.0626719		0.326393
0.0627059		0.029773
0.0627055		0.00012302
0.0625432		0.187347
0.0594352		0.932404
0.0636774		2.17646
0.07293		3.59675
0.0780038		2.18237
0.0867753		2.95259
0.0995334		3.88763
0.101339		0.615279
0.101437		0.212517
0.101436		0.00229451
0.101436		0
0.966242			13.7498
0.957162			11.5221
0.951482			12.2071
0.938416			5.3984
0.923691			11.4015
0.909759			11.0486
0.86571			15.7419
0.806056			15.5634
0.725109			19.9131
0.656149			17.39
0.541624			27.9466
0.4506			22.2619
0.355949			22.8093
0.262183			22.7141
0.2044			14.3073
0.147135			13.7891
0.111663			8.56717
0.0704193			9.99164
0.0374959			7.89296
0.0110432			9.93236
0.05814			11.9379
0.0730499			3.73305
0.0985775			6.23343
0.103309			1.84476
0.129565			7.23988
0.134536			2.2947
0.13751			0.891105
0.125746			2.83537
0.123332			0.61688
0.123811			1.16338
0.123341			0.336826
0.122772			0.173079
0.118185			1.34037
0.118364			0.0431851
0.110713			2.26989
0.108874			0.678745
0.108874			0
0.109866			0.340774
0.113769			1.29685
0.115472			0.745242
0.115472			0
0.891299				16.2445
0.891303				0.0377032
0.89463				2.06193
0.881614				4.63547
0.881649				0.0173644
0.881488				0.0573267
0.753599				35
0.688046				24.0665
0.617499				27.4957
0.561498				23.1531
0.50105				22.5409
0.435263				24.5352
0.376355				21.4092
0.317				22.8678
0.258588				21.8959
0.212903				17.0775
0.17358				14.3366
0.140061				12.0062
0.122596				6.21759
0.110378				5.80784
0.0860179				8.98056
0.0587236				9.71082
0.021413				13.2776
0.0202538				14.7885
0.0619586				14.8454
0.0759178				4.96419
0.0803362				1.59412
0.0810308				0.670579
0.11209				11.0467
0.117934				3.0576
0.115386				0.9443
0.108747				2.47866
0.110272				0.723181
0.105517				1.73224
0.105473				0.0649485
0.105469				0.00297088
0.103458				0.728061
0.103458				0
0.10492				1.75626
0.105009				1.25575
0.103277				0.927914
0.10285				0.155765
0.10285				0.000556894
0.10285				0
0.958826					14.7992
0.944174					14.1894
0.939928					3.58557
0.945499					2.85363
0.939543					2.30073
0.933794					2.46059
0.909781					11.1122
0.889519					8.14592
0.856735					14.3376
0.828529					13.5488
0.761022					26.9093
0.699213					24.2363
0.624559					28.1322
0.556864					24.8192
0.487062					25.9949
0.408911					28.5306
0.337219					26.1126
0.275114					22.7199
0.214594					22.2994
0.152973					23.1434
0.107894					17.8155
0.10068					3.64812
0.0991932					0.618973
0.0992721					0.0720549
0.0992918					0.0210086
0.0989662					0.177906
0.084521					5.27816
0.0547041					10.8638
0.030419					9.02742
0.00986654					8.34798
0.0263718					12.1638
0.0302053					1.50063
0.0367542					3.22218
0.0418673					1.88908
0.0426821					0.948153
0.0495735					2.90408
0.0607205					4.18006
0.0698189					3.32789
0.0829329					4.79948
0.0955783					4.60663
0.1025					2.58611
0.106272					1.43419
0.111045					1.82648
0.116224					2.05371
0.118296					0.808316
0.983848						2.34866
0.98182						1.29108
0.984197						0.58526
0.987537						1.3447
0.98469						0.972557
0.986252						1.00854
0.987677						1.22958
1						3.53068
0.997957						0.489651
0.998273						0.402303
0.995664						2.00475
0.989844						3.24109
0.985926						3.02998
0.981942						1.24154
0.982203						3.34772
0.973017						2.22645
0.971068						0.683653
0.971291						0.0714495
0.969818						0.511478
0.969776						0.148934
0.969106						0.175811
0.966663						0.637001
0.966128						0.709232
0.966374						0.717454
0.966374						0
0.970332						1.32329
0.965244						1.29898
0.967344						1.22024
0.969715						0.605529
0.969701						0.00433478
0.970657						0.682827
0.968695						1.26765
0.968257						0.727172
0.972171						1.48994
0.971747						0.1651
0.972314						0.140611
0.97757						1.3017
0.978668						1.42467
0.981433						3.54858
0.971812						3.57324
0.94096						8.01737
0.882376						13.8375
0.818158						15.1932
0.737119						19.4001
0.640368						23.0107
0.548612						21.7022
0.431101						27.7398
0.333095						23.3187
0.221103						26.455
0.11941						24.2173
0.0629969						13.7824
0.0424038						9.7694
0.0421903						1.97061
0.0448434						1.34237
0.0443605						0.882773
0.047304						0.757783
0.0472627						0.0782542
0.0472752						0.229472
0.893198							14.5019
0.911236							8.25423
0.911767							0.81751
0.903263							3.12509
0.890056							5.59879
0.891129							6.06129
0.888925							2.55406
0.894853							9.1899
0.892913							10.3772
0.88891							14.8181
0.889189							12.4472
0.893259							13.9662
0.894042							13.9847
0.904285							14.5921
0.909971							14.2613
0.910037							2.42162
0.910495							2.21087
0.919009							3.45826
0.930005							4.97521
0.940322							5.44856
0.946366							4.44669
0.950548							2.09654
0.966148							6.45332
0.972775							5.27946
0.98083							4.25031
0.980826							0.407862
0.981872							0.637031
0.98147							0.296738
0.985265							1.40419
0.989074							1.66282
0.989311							0.78636
0.992611							1.24666
0.996189							1.37254
0.996189							0
1							1.409
0.999948							0.0203342
0.997204							1.02186
0.992306							2.04817
0.989958							1.62997
0.976142							5.20465
0.966137							6.38916
0.961224							10.5229
0.947245							14.8214
0.942698							7.57772
0.944654							2.88832
0.944349							0.899227
0.94734							1.09848
0.943321							1.49518
0.942403							0.954007
0.946003							1.32175
0.94423							1.34116
0.943871							3.4863
0.942389							3.14327
0.940665							0.914694
0.94007							2.29183
0.936842							4.10277
0.925813							5.7217
0.918423							5.65142
0.901613							10.3935
0.887898							8.75857
0.857373							17.714
0.836124							13.6499
0.799839							20.5803
0.769654							17.3365
0.734409							18.842
0.695594							19.1969
0.652348							20.3535
0.608117							19.9619
0.562525							20.4155
0.524987							17.4346
0.473206							26.1782
0.4324							19.263
0.382769							20.9179
0.331626							20.9361
0.276636							22.365
0.231912							18.5908
0.180527							19.7977
0.153485							12.5009
0.14963							1.52207
0.111042							14.2512
0.0716912							15.6498
0.0660103							3.0592
0.0628316							1.38668
0.0712639							3.42697
0.0571149							5.38804
0.0382582							7.09451
0.0286459							5.00935
0.0220384							6.08206
0.966002								12.0004
0.965857								2.02731
0.965038								0.471565
0.965038								0
0.961665								1.9898
0.956462								3.87021
0.930873								5.64374
0.930807								0.0608329
0.859963								15.5048
0.810866								11.8442
0.743452								15.187
0.743142								0.0742083
0.592084								33.3569
0.505653								17.5524
0.504841								0.169371
0.411681								18.9671
0.229305								39.211
0.1784								12.908
0.178407								7.5
0.174577								1.29259
0.179254								1.05675
0.181763								1.44006
0.181991								0.269732
0.169154								2
0.169517								3.02864
0.17315								2.99299
0.17315								0
0.167713								3.77223
0.176095								3.99652
0.202513								7.79046
0.202527								0.0035511
0.177327								5.6345
0.165347								2.47058
0.161725								0.787006
0.161725								0
0.99789									0.13627
0.997138									0.961813
0.990391									3.20741
0.993607									1.25622
0.998049									1.62453
0.999029									0.422168
1									0.452844
0.985163									7.7139
0.979828									4.05316
0.97972									2.62872
0.974733									1.86178
0.97467									0.0427632
0.973083									2.57948
0.975412									0.917336
0.973436									0.744359
0.970133									1.30515
0.97017									0.484652
0.96996									0.0824607
0.972457									1.23634
0.972154									3.24347
0.968914									2.73237
0.967818									0.445218
0.954755									4.73214
0.935114									7.9661
0.905198									10.8426
0.874327									11.285
0.849909									10.0372
0.816984									12.3568
0.779569									14.0363
0.741156									13.9447
0.713397									10.2096
0.672886									14.6079
0.638235									13.006
0.595395									15.7906
0.549546									16.72
0.504266									17.3195
0.454509									18.105
0.397545									20.9876
0.350765									16.8385
0.30529									16.4927
0.250613									19.9627
0.200984									17.888
0.179356									7.80524
0.149771									10.6564
0.110674									14.064
0.0780741									11.7456
0.0335712									16.0063
0.00798222									9.35102
0.0275501									11.9975
0.0367196									3.33591
0.0369928									0.131722
0.036353									0.254515
0.0363392									0.0185888
0.0363392									0
0.0363392									0
0.582839										0
0.582839										0
0.566296										7.26293
0.544221										6.90394
0.567177										5.87958
0.584878										7.83911
0.60802										6.6947
0.627298										5.76109
0.654581										8.14225
0.689902										11.9478
0.68456										1.4196
0.658795										8.22088
0.637471										5.43564
0.629451										4.93027
0.622371										11.8361
0.632212										12.264
0.649319										14.9989
0.672459										14.492
0.700781										13.7851
0.725165										13.2036
0.744466										12.1966
0.761532										15.7281
0.790107										17.5704
0.826494										17.7486
0.864485										15.5397
0.877942										11.868
0.888425										13.3245
0.896942										15.1427
0.919395										15.9272
0.927768										13.8551
0.94348										14.9594
0.957903										11.2476
0.971275										9.27978
0.9826										6.03115
0.995573										7.27972
0.996882										8.32053
1										2.93079
0.996147										9.2832
0.985892										10.7849
0.966782										10.3285
0.962671										10.9433
0.951397										8.81884
0.950766										8.69176
0.951848										4.73683
0.954176										1.25867
0.954549										0.882357
0.956715										1.2622
0.953787										2.88382
0.963606										3.09415
0.9573										2.02336
0.952527										6.60835
0.944938										2.10508
0.927221										5.07261
0.877005										13.1493
0.818091										15.5327
0.749473										17.8106
0.683892										16.8095
0.630733										13.5519
0.580243										13.7327
0.503205										19.6384
0.436159										17.4464
0.35077										21.778
0.277145										18.7696
0.189044										22.6288
0.123166										16.9046
0.0596136										16.7694
0.0322459										9.92813
0.0340073										1.85484
0.0320331										0.503513

## Sheet: ED Fig 10B
Normalized Distance	Theta
0.939016	90.0993
0.947786	123.325
0.960471	121.468
0.968143	116.367
0.96691	89.3921
0.954112	54.843
0.93476	20.5447
0.887766	1.20274
0.843387	18.8517
0.79544	19.0724
0.758503	21.4728
0.706543	21.4786
0.651665	25.6709
0.581283	30.9163
0.503801	29.3671
0.435496	32.5219
0.36567	29.9374
0.298148	21.0079
0.240464	15
0.168804	8
0.102524	1.32996
0.060352	1.32996
0.0502894	1.32996
0.0411138	1
0.032944	1
0.0283916	1
0.0259276	1
0.017975	1
0.0199162	1
0.0205583	0
0.0189538	0
0.0170661	0
0.012711	0
0.0201044	0
0.0240688	0
0.0276007	0
0.028223	0
0.0292874	0
0.0303813	0
0.832778		177.4
0.789991		19.5199
0.746659		13.5761
0.677705		3.29507
0.595343		5.78769
0.51418		7.3872
0.420603		4.33853
0.333435		0.80711
0.24139		3.51547
0.16123		4.88583
0.110589		10.8972
0.0844857		14.9005
0.0752661		24.6206
0.0641427
0.0557752
0.0517869
0.0371058
0.0388336
0.0525019		39.4
0.0599106		36
0.0618557		29
0.0622539		28
0.0642975		23.2
0.0655081		26.3
0.0636506		22.5
0.0636506		22.4
0.0626719		22
0.0627059		25
0.0627055		27
0.0625432		22
0.0594352		25
0.0636774		44
0.07293		48
0.0780038
0.0867753		29
0.0995334		15
0.101339		4
0.101437		4
0.101436		4
0.966242			80.4857
0.957162			82.745
0.951482			83.4062
0.938416			69.8431
0.923691			70.6265
0.909759			45
0.86571			20.7567
0.806056			15.7685
0.725109			10.2598
0.656149			10.2
0.541624			10.2328
0.4506			10.2328
0.355949			10.2328
0.262183			12.5163
0.2044			8.51648
0.147135			4.55234
0.111663			4.55234
0.0704193			4.55234
0.0374959			4.55234
0.0110432			4.55234
0.05814			3
0.0730499			0
0.0985775			0
0.103309			0
0.129565			0
0.134536			0
0.13751			0
0.125746			0
0.123332			0
0.123811			0
0.123341			0
0.122772			0
0.118185			0
0.118364			0
0.110713			0
0.108874			0
0.108874			0
0.891299				58.0751
0.891303				57.9803
0.89463				127.244
0.881614				17.3924
0.881649				17.4071
0.881488				17.5416
0.753599				17.0646
0.688046				21.2536
0.617499				26.2122
0.561498				28.5337
0.50105				22.1653
0.435263				18.3611
0.376355				25.5706
0.317				24.4323
0.258588				31.3175
0.212903				22.7878
0.17358				10.8241
0.140061				21.1853
0.122596				42.8732
0.110378				20.5025
0.0860179				10.0648
0.0587236				1.29186
0.021413				4.00002
0.958826					124.795
0.944174					132.983
0.939928					54.7047
0.945499					1.94683
0.939543					30.2841
0.933794					24.6191
0.909781					18.7482
0.889519					18.7482
0.856735					25.5521
0.828529					25.5521
0.761022					13.9571
0.699213					14.3162
0.624559					7.4725
0.556864					6.42013
0.487062					6.08071
0.408911					6.42362
0.337219					7.3805
0.275114					6.65521
0.214594					6.65521
0.152973					6.65521
0.107894					6.65521
0.10068					6.65521
0.0991932					6.65521
0.0992721					6.65521
0.0992918					19.0577
0.0989662					18.999
0.084521					6.06063
0.0547041					2.41587
0.030419					8.80939
0.00986654					8.4
0.0263718					0
0.0302053					0
0.0367542					0
0.0418673					0
0.0426821					0
0.0495735					0
0.0607205					0
0.0698189					0
0.0829329					0
0.0955783					0
0.1025					0
0.106272					0
0.111045					0
0.116224					0
0.118296					0
0.983848						169.478
0.98182						163.357
0.984197						159.974
0.987537						163.072
0.98469						163.251
0.986252						158.762
0.987677						139.91
1						127.658
0.997957						124.583
0.998273						113.482
0.995664						104.818
0.989844						103.03
0.985926						103.044
0.981942						104.898
0.982203						94.2527
0.973017						89.0331
0.971068						88.9118
0.971291						88.3097
0.969818						90.4246
0.969776						84.8362
0.969106						87.2636
0.966663						84.0967
0.966128						79.5383
0.966374						89.3401
0.966374						89.3401
0.970332						99.8056
0.965244						105.685
0.967344						102.98
0.969715						105.288
0.969701						105.304
0.970657						114.867
0.968695						108.636
0.968257						110.846
0.972171						113.264
0.971747						113.898
0.972314						113.007
0.97757						108.943
0.978668						106.292
0.981433						91.2852
0.971812						63.71
0.94096						5.62038
0.882376						3.34753
0.818158						178.845
0.737119						0.153291
0.640368						5.77392
0.548612						4
0.431101						3.88444
0.333095						5
0.221103						11.8772
0.11941						12.5494
0.0629969						28.5152
0.0424038						0
0.0421903						0
0.0448434						0
0.0443605						0
0.047304						0
0.0472627						0
0.0472752						0
0.893198							57.006
0.911236							121.303
0.911767							98.6106
0.903263							102.076
0.890056							81.1279
0.891129							74.9369
0.888925							83.468
0.894853							82.7803
0.892913							73.301
0.88891							82.5046
0.889189							85.7449
0.893259							83.3289
0.894042							88.513
0.904285							92.7474
0.909971							100.353
0.910037							112.204
0.910495							117.076
0.919009							135.137
0.930005							131.807
0.940322							140.956
0.946366							150.032
0.950548							146.313
0.966148							144.109
0.972775							152.333
0.98083							162.157
0.980826							163.635
0.981872							171.786
0.98147							171.154
0.985265							164.757
0.989074							166.107
0.989311							164.02
0.992611							159.532
0.996189							161.606
0.996189							161.606
1							164.779
0.999948							162.565
0.997204							161.636
0.992306							152.75
0.989958							143.671
0.976142							88.469
0.966137							82.8015
0.961224							66.5882
0.947245							63.6434
0.942698							62.0507
0.944654							103.672
0.944349							105.879
0.94734							127.212
0.943321							112.024
0.942403							125.553
0.946003							84.3556
0.94423							82.4952
0.943871							93.9751
0.942389							95.0927
0.940665							97.0759
0.94007							76.5609
0.936842							117.898
0.925813							45.5948
0.918423							130.17
0.901613							50.5532
0.887898							49.7189
0.857373							55.4918
0.836124							53.2507
0.799839							52.5483
0.769654							52.9185
0.734409							38.1378
0.695594							135.016
0.652348							35.2116
0.608117							35.721
0.562525							32.1828
0.524987
0.473206							40.5634
0.4324							30.4479
0.382769							27.3089
0.331626							30.1015
0.276636							31.248
0.231912							29.1834
0.180527							26.9165
0.153485							1.31536
0.14963							2.50487
0.111042							0
0.0716912							0
0.0660103							0
0.0628316							0
0.0712639							0
0.0571149							0
0.0382582							0
0.0286459							0
0.0220384							0
0.966002								87.2164
0.965857								97.8583
0.965038								103.852
0.965038								103.852
0.961665								97.9446
0.956462								84.5539
0.930873								52.4964
0.930807								52.4793
0.859963								35.076
0.810866								35.3183
0.743452								43.2877
0.743142								43.3303
0.592084								9.45914
0.505653								0.98757
0.504841								0.441688
0.411681								3.00329
0.229305								23.51
0.1784								31.7224
0.178407								31.7208
0.174577								32.424
0.179254
0.181763
0.181991
0.169154
0.169517
0.17315
0.17315
0.167713
0.176095
0.202513								26.6344
0.202527								26.3692
0.177327								11.3761
0.165347								5
0.161725								3
0.161725								3
0.99789									125.782
0.997138									127.828
0.990391									125.32
0.993607									133.082
0.998049									138.174
0.999029									138.919
1									137.724
0.985163									129.119
0.979828									98.9854
0.97972									79.1531
0.974733									81.9567
0.97467									76.8703
0.973083									97.0929
0.975412									94.1714
0.973436									87.0325
0.970133									82.1816
0.97017									82.4743
0.96996									81.6025
0.972457									76.8391
0.972154									60.8787
0.968914									53.5439
0.967818									52.636
0.954755									21.3535
0.935114									4.19719
0.905198									6.44646
0.874327									15.7116
0.849909									22.4007
0.816984									25.2984
0.779569									11.752
0.741156									12.591
0.713397									12.8431
0.672886									15.1359
0.638235									11.7277
0.595395									5.70718
0.549546									16.5601
0.504266									2.4815
0.454509									6.14065
0.397545									9.15716
0.350765									4.92756
0.30529									10.2617
0.250613									10.0946
0.200984									14.8849
0.179356									8.33989
0.149771									9.83285
0.110674									10.9038
0.0780741									7.4082
0.0335712									0.459081
0.00798222									27.33
0.0275501									10
0.0367196									4
0.0369928									4
0.036353									4
0.0363392									4
0.896942										114.32
0.919395										116.38
0.927768										119.776
0.94348										119.738
0.957903										114.166
0.971275										119.755
0.9826										127.235
0.995573										118.007
0.996882										119.772
1										84.771
0.996147										86.5588
0.985892										69.1998
0.966782										70.2556
0.962671										71.7793
0.951397										88.2852
0.950766										83.4791
0.951848										93.9947
0.954176										108.087
0.954549										118.717
0.956715										126.604
0.953787										138.954
0.963606										144.751
0.9573										139.888
0.952527										88.7448
0.944938										62.8559
0.927221										10.2182
0.877005										15.2893
0.818091										9.11899
0.749473										2.80209
0.683892										1.72767
0.630733										10.4899
0.580243										3.68533
0.503205										0.0917216
0.436159										3.71599
0.35077										0.699272
0.277145										2.30271
0.189044										3.58211
0.123166										1.26145

## Sheet: ED Fig 10E
	WT-NS														WT-S
-1	3.36069	10.8378	10.139	0.066419	12.4366	0.143237	0.026219	2.70355	8.56853	7.16268	2.33341	0.780522	0.012112		14.9341	1.22763	0.026935	19.1893	0.367041	15.421	0.965588	3.08136
	3.96867	12.061	9.62844	1.03476	11.0544	1.20976	4.18406	4.24035	0.136618	5.44677	0.805287	1.56636	2.06943		0.024105	0.026725	2.38565	18.5585	9.27634	15.8273	5.1793	1.14653
	6.81496	12.7925	6.85614	0.06324	7.14541	4.31283	3.02524	1.07841	16.2599	14.3145	4.36111	2.22213	1.75595		29.6177	0	9.93391	18.7749	2.27456	12.6547	3.82249	0.48062
	6.17723	14.4209	12.0097	0	8.30972	1.42606	6.4642	1.2806	1.82285	0.016332	5.67463	1.38105	0.015117		13.1708	0	0.000859	15.9634	2.4579	14.3986	3.77941	0.131942
	3.90034	16.843	7.71104	0.99767	4.45669	2.62505	0.035722	0.705922	1.93296	12.4373	4.49401	1.65334	0		14.0823	0	5.90289	13.8915	8.06997	15.721	3.17853	0.134672
	4.42804	17.0904	8.4369	1.48673	1.7731	4.5298	11.1894	1.38454	0.031993	23.1045	0.44913	1.54798	0.40284		9.44079	0	21.675	14.5256	9.7329	7.51185	1.42233	0.658603
	3.88917	11.9865	7.96337	0.022776	0.176945	2.14608	10.5505	0.548665	8.86861	0.006135	1.12382	1.39437	0.301142		10.4235	0	14.335	9.63912	9.83628	5.0748	0.425601	0.377091
	1.94026	13.2478	7.69627	0.007473	0.412463	4.21559	12.7251	1.41438	7.13924	12.1224	2.20832	1.83269	0.856101		8.26737	0	0.025796	16.3736	11.0389	2.16571	3.81e-06	0.06096
	0.50299	11.3598	3.3007	0.215864	0.227696	4.03731	8.22185	0.161093	8.50028	15.2138	2.17766	3.10709	0.182161		9.58454	0	14.5938	16.9065	13.5206	1.78776	0	0.477845
	0.273305	2.69119	0.458426	0	0.079941	1.9999	14.5592	0.365362	8.26138	26.1225	0.497815	6.24301	1.17062		15.0361	37.0158	21.1155	15.9754	11.2596	6.31022	0	0
0	1.53641	0.929099	3.27549	0	0.148226	0.647679	13.6119	0	3.20137	0.08503	0.0862	6.56924	0.083826		14.5019	12.8111	16.2445	13.7498	8.76538	14.7992	2.34867	0
	0.49425	12.557	1.65557	0.246269	0.026532	0.745528	1.41728	0.156928	3.98238	3.76657	0.454218	4.93103	1.07397		8.25423	13.2317	0.037703	11.5221	9.7021	14.1894	1.29108	0
	3.29395	21.9338	1.54967	0.953644	0.293823	2.69158	1.1213	1.54957	13.7025	10.1022	0.196144	8.39187	0.91048		0.81751	13.2784	2.06193	12.2071	7.76491	3.58557	0.58526	7.26293
	1.66721	18.4449	1.24636	0.685149	0	1.24941	2.68527	1.82109	6.48212	3.50624	1.52465	3.49327	0.387492		3.12509	20.5023	4.63547	5.3984	6.95028	2.85363	1.3447	6.90394
	3.90591	15.9703	1.28944	4.00449	0.286971	1.32219	6.88627	0.563738	3.45023	0.075257	2.02389	5.39569	2.04779		5.59879	24.1596	0.017364	11.4015	5.71643	2.30073	0.972557	5.87957
	3.88098	2.06226	4.00437	3.76164	0.151041	0.34302	8.22902	0.667212	1.78811	5.14098	1.08205	1.08321	3.68699		6.06129	23.8139	0.057327	11.0486	7.46792	2.46059	1.00854	7.83911
	2.70261	3.88525	8.46617	2.84761	3.35181	1.73451	4.94768	0.45797	9.95201	8.06972	0.595501	1.42321	4.12479		2.55406	27.4681	46.6246	15.7419	9.74359	11.1122	1.22958	6.6947
	0.961492	0.841677	5.6708	3.9378	3.16773	0.008243	2.93885	3.03246	9.23958	2.74338	0.125303	3.97805	2.31839		9.1899	25.5671	24.0665	15.5634	17.8242	8.14592	3.53068	5.7611
	0.948419	0.241852	12.5535	2.68616	6.08596	0.08176	3.58739	2.30438	11.4684	0.055543	2.18221	5.0286	0.576835		10.3772	27.0733	27.4957	19.9131	16.3653	14.3376	0.489651	8.14225
	0.634811	0	7.9174	4.51943	6.7241	0.517438	5.20477	0.248266	8.05665	1.56238	3.58654	7.35631	0.113928		14.8181	23.7034	23.1531	17.39	18.3035	13.5488	0.402303	11.9478
1	0.372442	0.102424	6.52674	10.6255	10.2027	2.65476	5.30914	2.73083	9.92878	0.850898	3.34618	3.24737	0.303881		12.4472	15.457	22.5409	27.9467	13.919	26.9093	2.00475	1.4196
	0.413694	0.011386	3.24893	11.2003	12.4403	3.65466	9.26201	7.8499	10.467	1.05067	4.42592	3.03384	0.624258		13.9662	8.23178	24.5352	22.2619	20.7964	24.2363	3.24109	8.22088
	0.022775	0.037822	3.85862	13.452	14.6083	10.7631	10.9632	10.2308	12.9724	0.167379	3.28701	2.19275	0		13.9847	2.70357	21.4092	22.8093	20.7573	28.1322	3.02998	5.43564
	0.034891	0	6.39256	7.91574	18.3432	18.9926	11.7766	11.2443	6.90923	0.184281	1.22552	0.924857	0.339877		14.5921	3.40182	22.8678	22.7141	27.4613	24.8192	1.24154	4.93027
	0.638178	4.1925	6.64804	3.93198	8.66284	17.1654	14.2499	11.0074	0.02835	0.211495	1.72565	1.73984	0.14876		14.2613	3.75147	21.8959	14.3073	30.5437	25.9949	3.34772	11.8361
	0.13643	4.56329	8.22623	2.83215	2.57995	16.5201	13.7364	9.26146	20.1878	1.37303	0.534531	6.07408	1.05564		2.42162	3.09654	17.0775	13.7891	27.2921	28.5306	2.22645	12.264
	0	1.47737	6.96102	7.30976	8.31977	23.4273	13.0654	10.306	7.17683	0.008012	0.612318	4.78422	0.692862		2.21088	7.44684	14.3366	8.56717	28.3866	26.1126	0.683653	14.9989
	1.26022	0.543385	5.4765	4.033	9.62679	6.87848	14.634	15.2106	12.2545	26.7519	0.30857	6.29362	0.09698		3.45826	4.5763	12.0062	9.99164	25.6572	22.7199	0.07145	14.492
	1.75775	3.06265	6.48733	6.72487	9.02169	3.43877	10.7531	11.5554	0.044452	16.7224	3.28696	3.77606	0.68373		4.97521	10.5999	6.2176	7.89296	22.023	22.2994	0.511478	13.7851
	2.1294	2.9838	5.99793	2.7558	8.41824	13.5172	7.66593	11.0497	24.9481	15.1196	5.86119	3.92239	0.360164		5.44856	2.29189	5.80784	9.93236	26.887	23.1434	0.148934	13.2036
2	2.07401	0.511644	7.54885	3.05655	2.93812	9.55005	4.62466	8.90169	11.5271	0.079438	6.38052	1.79176	0.35645		4.44669	0.936875	8.98056	11.938	24.8899	17.8155	0.175811	12.1966
	5.47347	0.110261	5.69178	6.02918	2.74055	7.65424	5.04459	9.05299	11.1442	37.7037	14.0432	1.55254	0.350879		2.09654	0.262491	9.71082	3.73305	16.1046	3.64812	0.637001	15.7281
	6.22185	0.844564	3.14708	6.67089	1.68983	7.41055	6.84066	7.172	0.012785	18.8645	16.0206	4.94803	0.604024		6.45331	0.724098	13.2776	6.23343	5.1292	0.618973	0.709232	17.5704
	2.16805	2.46762	2.1543	5.20204	3.24634	15.4905	7.69581	7.4097	19.7366	13.8265	16.1412	10.3824	0.436332		5.27946	0.356329	14.7885	1.84476	3.43962	0.072055	0.717454	17.7486
	4.19039	3.09925	0.130104	5.80593	3.28294	12.1426	7.84591	7.86603	6.77489	0.07178	16.4387	10.7675	1.71304		4.25031	0.602518	14.8454	7.23988	3.01789	0.021009	0	15.5397
	2.50468	0.514542	0.03009	6.40807	0.476013	9.62664	4.80285	5.91061	9.33758	19.9126	15.8792	10.3052	1.00304		0.407862	0	4.96419	2.2947	2.34494	0.177906	1.32329	11.868
	0.527484	0.297817	0.194761	8.46745	0.502629	9.29722	7.29859	5.67288	12.2572	7.48833	19.3644	10.2949	5.25595		0.637031	0.326393	1.59412	0.891105	1.83229	5.27816	1.29897	13.3245
	1.087	0.301863	0	7.44456	6.41922	5.70343	2.98985	1.83659	8.3	8.28623	21.9486	12.0318	7.15579		0.296738	0.029773	0.670579	2.83537	3.57717	10.8638	1.22024	15.1427
	0.038732	1.30283	0	2.56192	6.87094	0.908613	3.70002	0.178189	4.51216	7.05959	22.5218	0.01582	4.68163		1.40419	0.000123	11.0467	0.61688	7.37625	9.02742	0.605529	15.9272
	1.06723	1.07645	0	0.240638	3.23684	0.390827	9.63582	1.53e-05	4.43684	6.16115	20.8161	10.6048	2.77546		1.66282	0.187347	3.0576	1.16338	2.05871	8.34798	0.004335	13.8552
3	1.10278	0.019139	0.024367	0.549723	4.67157	4.33306	6.99443	0.126377	0.009834	4.97578	19.8714	4.45518	2.03509		0.78636	0.932404	0.9443	0.336826	0.591275	12.1638	0.682827	14.9594
	2.25767	0.240692	0	0.558898	0.934344	9.2341	4.73085	0	10.9756	8.31172	21.3967	5.15491	0.175185		1.24666	2.17646	2.47866	0.173079	2.38867	1.50063	1.26765	11.2476
	0.022509	0.082484	0.003344	2.95643	0.449195	10.1748	4.78724	0	1.42029	8.26927	21.3031	1.13512	0.219525		1.37254	3.59675	0.723181	1.34037	4.24609	3.22218	0.727172	9.27978
	0.189602	0	0	1.26962	0.536683	10.509	2.85683	0	3.0226	4.84121	21.8322	0.789306	5.7884		0	2.18237	1.73224	0.043185	3.60855	1.88908	1.48994	6.03115
	4.04947	0	0	2.02773	2.66733	8.68409	2.31022	0	4.70399	4.31228	20.1706	0.921479	4.76285		1.409	2.95259	0.064949	2.26988	1.80411	0.948153	0.1651	7.27972
	1.14875	0	0	1.60684	1.10697	2.86892	1.68068	0.003367	6.76351	2.2606	16.979	0.032587	3.80662		0.020334	3.88763	0.002971	0.678745	1.30386	2.90408	0.140611	8.32053
	0.078035	0	0	1.04282	4.04905	1.33563	1.24604	0	3.9305	0.933845	18.8484	0.011791	1.76179		1.02186	0.615279	0.728061	0	0.27845	4.18006	1.3017	2.93079
	0.915768	0.502432	0	1.79538	6.49984	0.319176	4.429	0.284142	3.00752	1.25627	13.0855	0.228797	0.317987		2.04818	0.212517	0	0.340774	0.626716	3.32789	1.42467	9.2832
	0.010842	0	0.470281	0.614893	6.6802	0.494826	8.43924	1.00468	4.30793	1.98626	13.078	0.377607	0.852128		1.62997	0.002295	1.75626	1.29686	0.917512	4.79948	3.54858	10.7849
	0	0.200125	0.51765	0.682618	9.63888	3.67779	1.7853	1.55181	4.07375	3.32474	5.72374	1.97744	0		5.20465	0	1.25575	0.745242	0.755973	4.60663	3.57323	10.3285
4	0	0.004212	0.002467	0.528741	4.61727	3.59777	0.700826	5.57727	4.99017	10.2332	0.412475	3.79204	0.679568		6.38916	0	0.927914	0	1.27723	2.58611	8.01737	10.9433
	0.165221	0.321499	0.000381	1.93288	6.47156	0.542306	1.19891	5.78151	2.91098	9.93146	0.825929	12.4323	3.56051		10.5229	0	0.155765	1.17982	1.86388	1.43419	13.8375	8.81884
	0.054009	0	0	0.381247	4.81074	1.40982	5.62243	7.81813	0.834444	8.06135	0.055276	23.1903	3.38383		14.8214	0	0.000557	1.2263	2.87251	1.82648	15.1932	8.69176
	0	0	0	0.225403	5.48936	1.95568	5.56123	7.14436	2.24656	4.14551	0.296657	22.8911	3.13816		7.57772	0	0	0.24816	2.34655	2.05371	19.4001	4.73683
	0.063463	0.157659	0.006205	0.181445	6.99382	0	5.55187	1.12083	5.04653	3.07085	0.356599	23.9517	3.65171		2.88832	0.075166	1.91045	0.36567	1.89105	0.808316	23.0107	1.25867
	0	0.016853	0	0.088293	9.51006	0.691466	8.11958	1.43397	4.05054	1.01532	0.117979	24.4238	3.35976		0.899227	0.944069	0.135887	0.611104	5.91376	0.872468	21.7022	0.882357
	0	0	0.621947	0.008269	8.8447	0.612569	9.83933	1.19657	4.69745	0.751539	0	23.0143	0.721068		1.09848	0.170169	0.016576	0.249105	2.27725	0.479524	27.7398	1.2622
	0	0	0	0.002319	3.09226	0.080583	12.3812	1.8914	8.63012	0.066788	0.862084	23.9757	3.67604		1.49518	0.007757	0.003537	1.24832	0.921601	1.63784	23.3187	2.88382
	0	0.01264	0	0	3.11472	2.54839	12.9635	1.65194	4.81051	0.132895	0.237285	26.4897	5.34471		0.954007	0.742703	0.066209	0.476446	0.40638	1.02875	26.455	3.09415
	0	0.188344	0	0	3.66463	1.8477	11.7051	0.414822	6.78	2.75785	0	17.033	7.65788		1.32175	0.295791	0	0	3.13891	0.508888	24.2173	2.02336
5	0	0.4583	0	0	3.33386	1.63207	9.35543	0.548863	6.13395	0.781219	0.285635	18.2381	7.72932		1.34116	0.42689	0.031312	1.32228	13.3229	0.101306	13.7824	6.60835
	2.14208	0.026646	0	0	1.95165	1.64948	11.585	0.153252	5.73235	1.75419	0.702688	14.2785	7.60556		3.4863	0.454745	0.152942	1.4082	9.60168	1.55637	9.7694	2.10508
	0.194705	0.194246	0	0.089803	0.384175	0	7.10473	0.831234	8.4145	0.559144	0.056311	10.1257	7.18714		3.14327	0.464207	0	0.502829	5.01105	1.19239	1.97061	5.07261
	0.011988	0.018792	0	0.03234	0.973453	0.96565	4.06124	1.20712	6.54354	0.416445	0.267393	9.59165	9.83782		0.914694	0.013375	0	0.380036	16.9815	0.267888	1.34237	13.1493
	0.413145	0.357218	0.080984	0	2.64473	4.91933	5.18339	2.93106	3.41009	0.169453	0.132573	1.15876	16.5562		2.29182	0.134662	0	0.27042	7.09053	0.350252	0.882773	15.5328
	1.84243	0.120001	0.00939	0	0.496805	4.22649	4.52076	2.22283	3.46382	0.627986	0	2.32161	11.0008		4.10277	0.014222	1.03752	0.778396	3.03873	2.10812	0.757783	17.8106
	1.04793	0.500994	1.04554	0	0.069073	4.47722	2.89443	0.272311	0.22891	0.053946	0	1.86297	5.20377		5.7217	0.283216	0.535204	0.378756	3.24187	1.03221	0.078254	16.8095
	0.077938	0.377036	0.029323	0	0.958727	5.82494	1.04655	1.47745	2.38467	0.336352	0.173415	3.59571	8.66863		5.65142	0.25416	0.31637	1.71986	4.35151	1.17126	0.229472	13.5519
	3.72023	0.324604	0.001198	0	0.907533	1.96064	0.221624	0.9608	3.78207	0	1.69548	1.37284	8.14788		10.3935	0.177144	0.847989	2.84567	6.09755	3.26424	4.91873	13.7327
	2.34641	0.422281	0.770134	0	0.081978	1.05519	0.685847	1.27774	4.02435	0.043229	0.576931	4.74283	1.99174		8.75857	1.19737	0.016556	1.42061	6.29826	3.54557	8.65612	19.6384
6	1.79816	0.026617	1.29328	0	1.74459	0.027392	0.013133	0.10916	4.86946	0.726609	2.23513	4.21663	1.29739		17.714	0.682031	0.659813	0.253169	9.26824	1.17719	7.19972	17.4464
	1.19371	0.631269	4.76052	0	1.04681	0.743841	2.14433	0.850083	0.128217	0.042735	1.38105	7.24352	5.88405		13.6499	1.46594	1.07872	3.03541	8.23363	0.284922	3.61122	21.778
	1.50936	0.407208	3.07553	0.263237	0	0.72188	2.39763	0	4.23304	0	0	4.09547	9.13907		20.5803	2.07485	0	2.166	3.69348	0.488942	0.606895	18.7696
	0.187189	0.081672	4.07735	0	0.088441	2.05887	3.13238	0.465171	0.442257	0.065288	0.029853	1.21128	5.85035		17.3365	1.73835	0.343771	5.8193	6.71272	0.016664	0.482216	22.6288
	0	0.396458	4.5829	0	0.029741	1.03451	6.13777	0.017541	3.52991	0.77725	0	2.08063	1.54981		18.842	2.55175	0.926649	2.96226	7.96394	1.69133	0.014322	16.9046
	0.439219	0.043134	10.8691	0.202489	0.001184	2.35592	11.7391	2.45915	3.5336	2.37001	0.607169	0.894058	0.793523		19.1969	1.3332	1.63882	1.85001	0.822212	0.392097	0.256327	16.7693
	0.312949	0.193037	3.58321	0.008309	0	0.811864	8.96051	1.67456	6.04734	2.64065	1.17108	1.7502	0.46475		20.3535	1.75472	0.012201	0.480926	0.864163	0.318079	0.418537	9.92813
	0	0.052229	1.23851	0.253542	0.829548	0.928246	7.09961	2.02047	8.49402	5.27515	0.413831	0.137798	0.281392		19.9619	0.856661	0.383851	2.22525	0.462066	0.290278	0.242358	1.85484
	0.009753	0.00526	0.034125	0.030756	1.87249	0	9.0666	1.20349	4.38907	5.59347	0.110452	0.031202	1.57803		20.4155	0.947919	0.563313	0.5114	0.015861	0.347536	0	0.503513
	0	0	0.453708	0.129968	0.521576	0.346517	7.18944	0.150529	7.75152	2.6804	0.110959	10.8782	2.5878		17.4346	0.801011	1.86388	2.44045	0.264259	0.744081	0.802595	15.5831
7	0.062938	0	0.356717	0.58766	1.57312	1.35115	6.13362	0.796191	5.78985	4.22945	0.072775	2.4391	0.019864		26.1782	0.747545	4.31889	1.4413	0.293066	0.368424	2.16831	7.89569
	0.265994	0	0.016015	0	2.71969	1.16403	9.05717	0.523396	1.81029	3.95411	0.013695	7.71061	0.771107		19.263	0.421495	4.05251	1.43219	0.519543	1.35829	1.59467	0.397542
	0.001795	0	2.39809	0	0.893368	2.35495	9.74248	0	0.45974	3.69909	0.058627	8.03904	0.390127		20.9179	0.640494	0.007656	0.475381	0.154747	2.09534	0.033735	3.38086
	0.000755	0	0.786251	0	1.44128	3.3456	10.9542	0.056301	2.63859	3.69507	0	2.53173	0.797659		20.9361	0	0	1.39804	1.29976	0.919957	0.209531	2.91781
	0.243082	0	0.355318	0.395176	0.153926	2.34898	0.222766	0	3.58452	3.74878	0.071393	0.785318	2.39143		22.365	0.582764	0	0.02938	0.800635	1.73211	1.19492	3.35801
	0	0	0.145277	0	0.324557	2.49858	3.88364	0.148968	1.53716	2.02895	0	0.834774	4.93776		18.5908	2.6823	0	0.002755	1.04259	3.77742	2.15049	9.38423
	2.35302	0	0.310976	0	0	0.131641	1.90096	0	1.238	0.934845	0.060855	0.010108	5.04358		19.7977	0.47056	0	0	0.192495	3.35562	4.03071	1.50761
	1.72029	0	3.88451	0.507434	0	0	3.42739	0	1.04232	0.106764	0.682202	0.789343	4.90087		12.5009	0.846826	0	0.350831	0.719106	0.489593	1.24078	2.53293
	0.617495	1.58633	1.29322	0.017379	2.9093	0.107432	1.00325	0.256478	1.18918	0.215124	0.047772	0.482617	2.7936		1.52207	1.9802	0.316508	0.679909	0.495564	1.18573	1.66306	2.14081
	0.368591	1.02886	0.641731	0.001685	1.67436	0.174902	1.71557	0.400966	0.597347	0.233187	0.844835	0.327916	5.53025		14.2512	1.24192	0	0.650429	0.486393	1.41115	0.386523	0.879905
8	0.63606	1.54614	0.479549	0	1.04537	0.174848	2.57943	0.422313	0.987441	0.06005	0.218633	0.091339	2.094		15.6498	3.95655	0	2.5995	0.201426	4.90121	0.039192	1.73501
	0.627997	5.07674	0.26189	0	3.30904	0.312106	4.9776	0.933652	0.113	1.71967	0.594948	0.338887	1.95438		3.0592	1.77371	0	0.107964	1.41837	0.117679	0.148382	2.10742
	0.564055	3.08737	0	0	1.6928	5.64317	2.99685	0.290773	0.271286	2.48516	2.01532	0.997898	3.04646		1.38668	1.58525	0	0	0.004798	7.74082	2.38992	0.578691
	1.04093	0.753654	0.784304	0	0.479163	4.32435	2.16554	2.47243	4.32e-05	2.99016	1.35655	0.567129	4.07319		3.42697	2.5012	0.533494	0	0.164357	4.06556	7.67607	1.39243
	1.59596	0.51105	0	0	0.328642	4.81366	0.204876	0.428246	0.39789	2.63771	0.549865	1.10416	5.42805		5.38804	2.72787	0.472768	0	0	1.13698	0.289978	0.630208
	0.501673	0.090273	0.245115	0.222227	0.497815	4.512	2.08655	0.177428	4.64009	6.59191	2.22448	0.365596	0.71519		7.09451	4.30057	0.860182	0.004476	0.55811	1.39329	0.758795	0.666126
	0.849655	0.326198	0.033848	0.01944	0	8.24636	1.82389	0.737136	6.52783	5.05929	0.515292	0.543018	1.00645		5.00935	3.79614	0.494662	0	0.018263	0.919142	0.633188	0.128077
	0.946257	0	0	7.63e-06	2.04928	8.97191	2.10753	2.80433	0.819879	4.80164	3.65971	0.575812	1.20499		6.08206	5.08742	0.248987	0	0.152541	1.04547	1.48056	0
	1.3815	0	0	0.402898	1.22917	7.63611	2.79423	2.52187	2.93624	5.19333	1.53529	1.00184	0.87218		7.1749	3.39412	0.242775	0	0.930113	1.49549	0.121387	0
	4.54862	0.684672	0	0	1.54021	9.2886	10.3763	5.34246	4.65588	5.19346	0.365572	1.73212	0.345551		11.0091	0.118447	0	0	2.10113	0.196387	0.836865	0
	1.44472	0.362728	0	0.824192	2.00896	5.38584	8.06819	0.831357	6.50215	2.81355	0.336581	1.00094	0.81576		6.21535	0.145601	0	0.149767	0.004096	0.500165	1.35405	0.402563
9

## Sheet: ED Fig 10F
WT-S	WT-NS
29.6177	6.851
37.0158	16.568
12.0868	9.7435
46.6246	21.9338
27.9466	12.3217
30.5437	17.4219
28.5307	26.4897
39.211	13.452
40.7495	12.132
20.9876	18.3432
27.7398	14.9735
	23.4273
	14.634

## Sheet: ED Fig 10G
WT-S	WT-NS
7.3	2.5
0.6	0.4
0.3003	0
0.6041	0.2002
1.0068	0.7006
1.4058	0.8065
1.5	0.8049
1.6	1.2011
2.1	1.308
3.7078	1.301
4.6422	1.5
	1.6
	1.7137

## Sheet: ED Fig 10H
WT-S	WT-NS
8.88889	20
2.22222	47.7778
2.22222	17.7778
4.44444	27.7778
11.1111	48.8889
1.11111	15.5556
5.55556	12.2222
2.22222	21.1111
	12.2222
	53.3333
	16.6667
	26.6667
	30
