# Supplementary material for: Hippocampal-hypothalamic circuit controls context-dependent innate defensive responses
Source: eLife. 2022 Apr 14;11:e74736. doi: 10.7554/eLife.74736 (PMC9042231; doi:10.7554/eLife.74736)
Supplement: Figure 8—figure supplement 2—source data 1. — HPC→AHN pathway inhibition impairs ultrasound (US)-evoked escape responses. [file elife-74736-fig8-figsupp2-data1.xlsx]

## Sheet: Sheet1
	Figure Title	Extended Data Fig 11. HPC→AHN pathway inhibition impairs ultrasound (US)-evoked escape responses
		a, Comparison between GFP (N= 15) and ArchT (N=20) mice for speed (pixel/s) plotted in relation to the normalized distance to the shelter (GFP best fit line, y=15.34 -5.226x-58.01x2,, maximum speed at x=0.5706; ArchT best fit line, y=9.768-0.2301x-28.23x2, maximum speed at x=0.5444).
		b, Head angle plotted in relation to the normalized distance to the shelter (GFP best fit line, y= 17.50+ (126075-4.765)/(1+10Log0.6336-x); ArchT best fit line, y=53.72+ (35041837-14.89)/(1+10Log0.3752-x))
		e, Changes in speed (pix/s) 1 second before and 9 seconds after the US onset (2-WAY RM ANOVA, time x genotype, F (100, 3400) = 1.638, ****p<0.0001).
		f, Maximum speed during escape running (unpaired t-test, t=2.047, df=33, *p=0.0487).

## Sheet: ED Fig 11A
ED Fig 11 A
NormalizeDistance	GFP Speed																						ArchT
0.955937	9.44269
0.955938	0.00131048
0.946867	3.97488
0.949814	3.01273
0.951428	2.30023
0.951447	0.00674935
0.950026	2.36159
0.949849	0.145994
0.952081	0.818942
0.952058	0.00847138
0.921172	10.356
0.881619	13.8247
0.846071	15.588
0.796416	19.1921
0.75166	16.3441
0.732708	14.6635
0.732719	0.0251063
0.678226	28.7739
0.652387	11.2972
0.618879	10.18
0.582634	12.5979
0.513993	21.4071
0.447007	20.7754
0.37007	23.7199
0.313237	17.7737
0.25417	18.5774
0.213755	12.154
0.165021	15.5661
0.127495	11.3334
0.106625	7.32861
0.0850776	6.92994
0.800963		13.0339
0.750705		17.01
0.705249		15.2888
0.67625		9.84704
0.647509		9.65804
0.615763		10.6963
0.581313		11.5934
0.537401		15.4879
0.491089		16.7844
0.452283		14.1821
0.409163		17.742
0.359911		18.3817
0.323461		15.2978
0.306031		7.88879
0.277602		10.2473
0.241559		13.3538
0.208061		14.0137
0.177456		11.3727
0.161582		5.70227
0.155802		2.19505
0.143525		4.43006
0.115026		9.80835
0.0967288		6.29148
0.0789987		5.96769
0.698765			18.5593
0.636124			19.4264
0.568265			21.0642
0.498			21.8225
0.427476			21.8818
0.361471			20.4739
0.292829			21.321
0.227034			20.4122
0.168413			18.2002
0.116133			16.8802
0.0739176			13.5353
0.039827			10.9495
0.012451			12.2759
0.0239752			7.56307
0.036792			4.35003
0.0400464			1.31694
0.0418543			0.560692
0.907325				9.29057
0.881695				11.1248
0.855309				11.65
0.823948				13.5123
0.785603				16.8249
0.756179				12.9991
0.734929				9.73391
0.730847				2.15941
0.730988				0.693065
0.727019				3.06965
0.690429				16.6622
0.645389				20.3793
0.602152				20.1016
0.545245				26.0677
0.492105				25.1213
0.445108				24.8758
0.397635				23.5277
0.349979				26.9446
0.308539				21.7918
0.279646				17.7676
0.248741				16.2181
0.220819				13.821
0.204184				8.18102
0.189407				6.36022
0.166443				10.231
0.149278				8.64091
0.125391				11.0822
0.115336				4.47531
0.108885				2.82027
0.111774				1.50134
0.114541				2.03796
0.113034				2.58663
0.108703				3.08757
0.106118				3.98051
0.101221				4.81821
0.10045				0.978939
0.104075				2.57509
0.104065				0.0954495
0.103422				0.574182
0.103343				0.0455709
0.102369				1.13027
0.100824				0.772382
0.958773					8.45651
0.961523					5.22936
0.963334					3.62859
0.963613					4.59554
0.958434					4.86728
0.95278					2.89805
0.949764					1.34809
0.94372					2.6506
0.94554					0.824861
0.951971					2.82717
0.954138					1.22587
0.955388					0.59142
0.94943					3.76884
0.940883					7.13867
0.932936					7.56046
0.921852					9.28545
0.906377					10.1005
0.881868					13.1691
0.859949					13.0276
0.839378					15.3874
0.816942					13.3531
0.788878					15.5571
0.757531					15.5598
0.727637					14.0353
0.699503					13.895
0.668843					14.5888
0.641516					15.4274
0.615858					16.1512
0.590344					17.0932
0.570252					16.9319
0.547231					14.6849
0.521928					16.0767
0.496545					17.1326
0.469553					16.1009
0.44327					16.609
0.412854					16.8504
0.385458					16.5228
0.357762					14.6622
0.333697					13.968
0.307079					13.5078
0.280691					12.3628
0.259022					10.2875
0.237212					10.391
0.217822					8.62677
0.190851					11.9879
0.163639					11.9211
0.136131					12.0816
0.113462					9.9123
0.112709					0.987743
0.113574					0.589603
0.11353					0.365318
0.993856						0.691237
0.992637						0.640019
0.991651						1.08565
0.993289						1.89726
0.990703						1.44914
0.98131						3.88835
0.969731						5.39592
0.935024						13.9032
0.895466						16.1889
0.851212						17.8187
0.813266						15.2033
0.76996						17.1751
0.720274						20.0271
0.664474						22.2887
0.620133						17.6699
0.572						19.1274
0.514611						22.9565
0.463193						20.586
0.409967						21.4721
0.367902						17.2207
0.329994						16.7977
0.291693						16.121
0.256923						14.9134
0.210767						18.7137
0.175023						15.3623
0.144005						13.3454
0.112705						12.5123
0.0941394						7.31195
0.0760419						7.16656
0.0730001						2.02785
0.0687339						1.69335
0.942383							8.47532
0.919419							9.00552
0.89598							10.3565
0.886473							7.98422
0.871425							11.0329
0.869632							11.4528
0.862646							14.4228
0.858157							13.3945
0.86538							11.4378
0.866063							14.7512
0.864833							11.7959
0.866831							7.99332
0.856288							6.68474
0.829906							10.3094
0.823422							4.68069
0.819229							10.6766
0.809561							7.87363
0.804352							2.13074
0.806081							3.50995
0.802122							3.21067
0.790881							4.99393
0.78063							3.99967
0.782148							0.713668
0.779432							2.02189
0.764364							6.3779
0.743445							8.51815
0.720417							9.20854
0.68174							15.1929
0.641362							16.437
0.604407							14.7108
0.566466							16.3008
0.533396							13.6648
0.498382							13.6851
0.458806							15.972
0.420101							15.0143
0.379347							15.8329
0.336717							16.0931
0.308124							10.7658
0.26864							14.9098
0.229858							14.6508
0.200002							11.9686
0.168251							12.038
0.147159							7.93223
0.122885							9.57532
0.103445							7.41324
0.103148							1.66761
0.097414							2.21955
0.0914816							2.23125
0.088233							1.28475
0.0783145							3.88205
0.0676447							4.04068
0.0482331							7.31513
0.0450699							1.27546
0.0414247							1.56987
0.0366675							1.91259
0.0373							2.14931
0.0307474							2.4675
0.990333								0.922358
0.99166								0.569806
0.993574								1.32094
0.99649								1.45742
0.995782								0.293336
1								1.85485
0.999803								1.59629
0.998962								0.745984
0.998801								0.282494
0.996193								1.07385
0.990377								3.43754
0.985161								2.43578
0.988987								2.00248
0.98767								0.729095
0.987202								1.98239
0.980508								3.53808
0.967184								9.20612
0.956523								9.28945
0.939411								9.44584
0.924708								6.6235
0.92085								1.59262
0.919574								1.35735
0.898948								8.94739
0.883514								7.24607
0.863306								10.6166
0.846223								9.94064
0.829299								11.0868
0.796899								15.9276
0.764733								14.0415
0.72182								18.1329
0.68179								17.8285
0.634756								20.0183
0.580909								22.9792
0.527831								22.2282
0.478257								21.205
0.431192								19.9109
0.379464								21.464
0.33063								20.5522
0.279282								21.1113
0.2333								18.9856
0.184973								19.7982
0.143208								17.2745
0.10256								16.934
0.0786877								10.1372
0.0608991								7.31683
0.0314608								13.0544
0.0112639								10.9434
0.0133058								6.64376
0.0215708								3.46465
0.0297292								3.33587
0.0133058								0.541409
0.945635									10.5591
0.964583									6.96966
0.983118									6.83298
0.993578									3.8031
1									2.79138
0.993754									2.27296
0.99478									1.35841
0.994575									7.40485
0.987162									6.15514
0.983922									5.80047
0.973929									5.32036
0.966137									5.56839
0.952695									9.96466
0.932294									10.6716
0.904269									11.932
0.866615									15.8996
0.83477									14.8285
0.806666									13.0977
0.784033									18.592
0.784016									0.00626235
0.782175									10.1642
0.790265									31.5812
0.797454									12.5876
0.797552									0.0482795
0.824497									16.7106
0.839372									9.37714
0.852285									6.03124
0.865071									6.8834
0.871447									4.91515
0.870273									3.44338
0.869853									1.35785
0.867069									3.63537
0.868591									0.582583
0.871461									1.93807
0.882227									4.03444
0.90145									7.00137
0.914943									4.90682
0.916902									1.59178
0.930229									5.36087
0.947279									6.21258
0.963226									6.0188
0.972046									3.214
0.974237									0.817603
0.978283									2.07269
0.982509									1.91428
0.977017									2.01105
0.984951									3.1421
0.985042									0.0599113
0.985277									0.335064
0.978237									2.69038
0.979839									0.591662
0.980005									0.4449
0.979924									0.0468807
0.984321									1.83395
0.977254									2.67911
0.966956									4.0122
0.96949									0.924106
0.987255									6.91886
0.981794									2.39294
0.963205									6.78034
0.943395									7.62822
0.933018									4.53232
0.926378									8.05716
0.926417									5.04177
0.927112									2.59983
0.922935									5.74209
0.913914									5.71032
0.910363									1.3014
0.899199									4.06846
0.871292									10.1593
0.842413									10.5573
0.80631									13.1822
0.772294									12.4339
0.729998									15.3918
0.692583									13.8592
0.662664									10.8956
0.624712									13.8197
0.578776									16.7571
0.525024									19.581
0.472724									19.0538
0.415967									20.6387
0.361739									19.7198
0.310398									18.6793
0.2641									16.9112
0.173478									32.9406
0.173429									0.0215551
0.152177									8.27446
0.126342									10.5214
0.0847678									15.1551
0.0847972									0.024049
0.972466										0.505012
0.974249										0.517171
0.975065										0.2117
0.974133										0.241621
0.970464										1.77811
0.970495										0.0217615
0.968581										0.950201
0.967835										0.348181
0.972509										1.53151
0.968734										1.084
0.968791										2.33102
0.968702										2.59439
0.964477										2.94337
0.97115										2.09849
0.969237										0.706551
0.965318										1.1515
0.973756										2.20629
0.973799										0.0606508
0.975755										0.517113
0.978131										0.668913
0.978428										1.37107
0.979813										0.825104
0.979653										0.533397
0.980888										0.381269
0.980884										0.0226887
0.98186										0.308307
0.980265										0.518146
0.981553										0.510427
0.980187										0.564212
0.979949										0.49588
0.977853										1.01129
0.973344										1.35408
0.974939										0.950031
0.967595										2.26099
0.968348										0.388281
0.972848										1.29225
0.981185										2.43206
0.998553										4.50483
0.998464										0.0238257
1										0.406861
0.992212										2.09799
0.993962										1.07215
0.995091										0.413907
0.984306										2.93881
0.964012										5.33013
0.943887										8.45174
0.923059										5.47768
0.888904										9.01188
0.852924										9.45978
0.81696										9.49543
0.807988										2.37293
0.805129										0.752841
0.785369										5.21803
0.758194										7.06928
0.713518										12.5876
0.64218										20.5446
0.547044										25.8261
0.480529										17.707
0.40025										20.9751
0.317435										21.5622
0.254328										16.4119
0.229063										7.26916
0.202834										10.4922
0.168994										16.0719
0.108153										15.932
0.0661991										11.3637
0.0431958										12.8568
0.0446344										5.27139
0.053825										4.27814
0.059293										1.42151
0.0563269										1.58017
0.0546665										0.827302
0.976313											7.41737
0.986932											9.43737
0.99481											7.98649
0.99388											1.36771
0.995188											0.548417
0.99895											2.49589
1											0.611203
0.999836											0.194541
0.99966											0.281045
0.995945											1.82317
0.991043											5.39697
0.971301											7.64897
0.946797											9.54972
0.916045											12.0133
0.887128											11.2551
0.853791											12.9157
0.835466											7.15452
0.828334											2.79941
0.814564											5.37434
0.797232											6.82738
0.7595											14.7233
0.719377											15.5929
0.672327											18.4917
0.625063											18.773
0.576377											19.4071
0.52495											20.2809
0.487493											14.6917
0.435746											20.1466
0.386316											19.2954
0.336206											19.5103
0.290699											17.6648
0.248835											16.2966
0.208613											16.0493
0.177839											12.0058
0.145512											12.565
0.13196											5.327
0.128819											2.17725
0.122876											3.83378
0.10518											7.6871
0.0860864											7.89722
0.0636183											8.91062
0.0499791											5.39561
0.0492454											0.457193
0.677047												7.14262
0.68649												6.83622
0.688962												6.57381
0.689383												5.16959
0.690441												10.0728
0.699562												12.0834
0.701108												12.3447
0.703194												14.2579
0.702719												13.6507
0.700752												9.44394
0.699924												13.9586
0.699625												12.2662
0.699533												9.02103
0.699658												1.34065
0.700349												1.46524
0.685697												0.34193
0.683891												0.36961
0.702417												2.47266
0.705189												3.90305
0.708256												2.76366
0.716943												5.3083
0.736138												6.22716
0.74963												4.01332
0.769322												4.40531
0.79064												9.83287
0.804251												12.3962
0.818362												8.22887
0.825017												1.34997
0.823609												0.754877
0.829044												4.10091
0.8295												1.85919
0.833321												1.72779
0.84353												5.82664
0.852572												5.56034
0.861679												8.49349
0.890162												10.9375
0.912166												11.2372
0.93248												13.8638
0.957719												12.4458
0.965574												4.31295
0.974389												5.1357
0.982216												5.16118
0.98304												0.40468
0.98155												0.778777
0.979935												1.38584
0.977383												2.54664
0.976801												0.87232
0.977431												0.434531
0.985386												0.189099
0.996254												0.500529
0.992213												0.873177
0.987881												0.871875
0.982287												1.31063
1												0.921466
0.995976												3.13104
0.993699												2.66641
0.998372												2.31084
0.998314												0.384013
0.998312												2.28045
0.998312												1.55727
0.998312												1.17285
0.998312												0.979735
0.998312												0.544317
0.998312												0.460388
0.998312												2.30527
0.998312												2.83182
0.998312												0.412163
0.998312												0.315112
0.717749												1.90431
0.665125												0.0900196
0.624801												0.235791
0.614017												0.660293
0.619641												0.187914
0.625102												0.0170866
0.617368												0.154326
0.598463												0.592852
0.57068												0.626477
0.544712												0.598925
0.504787												0.388057
0.464725												1.3012
0.419776												0.499154
0.368563												1.14168
0.322173												0.107819
0.214015												1.43102
0.214011												0.316288
0.161915												0.792274
0.121836												1.48277
0.114711												1.47578
0.114643												1.80856
0.0911371												6.26295
0.0512562												3.88105
0.9639													8.88162
0.961529													4.43823
0.956995													1.03316
0.955436													0.244528
0.95344													0.395161
0.962919													4.01702
0.973184													1.34948
0.976241													0.873212
0.976454													0.265873
0.975073													0.800819
0.975672													0.642149
0.970835													0.348647
0.985478													0.373297
0.990411													0.0698877
0.996438													0.345865
0.997369													5.81533
0.998981													5.71301
0.999343													8.0416
1													4.41751
0.994858													4.84681
0.99453													9.28095
0.993763													8.87498
0.967661													7.5902
0.975003													10.1426
0.987821													10.1149
0.98964													8.24373
0.990467													10.7259
0.995213													3.89429
0.991554													1.40052
0.994875													2.18663
0.997938													1.76927
0.996664													2.09499
0.998129													4.11068
0.996073													4.86927
0.984044													6.05546
0.966232													12.9018
0.95617													12.0286
0.952018													10.0495
0.951839													11.1732
0.951241													3.61735
0.946332													6.80331
0.946443													3.71189
0.943192													0.391757
0.940288													0.554653
0.927936													1.22904
0.895315													1.0914
0.853895													0.258771
0.802717													0.246308
0.753642													3.13867
0.706727													4.58224
0.655414													2.13842
0.613276													2.32402
0.568541													2.67884
0.518964													7.18268
0.467492													2.71306
0.413101													1.44068
0.355461													2.17751
0.293494													0.0306911
0.231589													0.00238213
0.171456													0
0.117485													0
0.0893082													0
0.0615139													0
0.0325929													0
0.0226874													0
0.0185097													0
0.0173987													0
0.0139116													0
0.994136														12.0609
0.985798														2.59623
0.997189														3.55942
1														2.07758
0.981767														9.57621
0.972528														3.55744
0.974558														0.78974
0.968859														6.77732
0.961683														2.80577
0.942826														8.75946
0.932935														4.56175
0.92843														1.66597
0.929844														1.9307
0.921775														2.7557
0.911598														3.30125
0.904512														2.19918
0.908814														2.50383
0.907697														3.10673
0.907681														1.31796
0.909739														0.640075
0.906183														1.28479
0.900164														3.11565
0.897447														3.52205
0.891428														5.64098
0.885694														2.34351
0.882322														3.87237
0.885761														6.25399
0.888242														3.49744
0.888246														0.412146
0.887528														0.23224
0.886064														2.67798
0.887826														1.84866
0.892448														1.55205
0.900991														2.71724
0.899177														1.89463
0.905735														2.288
0.9148														3.12715
0.928906														5.03524
0.930741														0.576362
0.928321														0.829556
0.929572														0.392362
0.923132														2.21015
0.928667														1.97091
0.918648														3.35529
0.918331														0.168967
0.918792														0.189026
0.92771														3.14991
0.923664														1.32837
0.924939														0.964532
0.918245														3.45861
0.929664														3.63539
0.944815														5.10086
0.944956														3.24625
0.951498														3.26745
0.960793														2.88415
0.971487														4.98454
0.983537														5.82537
0.982095														5.99089
0.969489														8.33464
0.967049														0.853627
0.963837														3.67327
0.949153														7.54909
0.931526														7.61731
0.927225														2.13707
0.919742														3.10344
0.901866														5.6506
0.86455														11.5826
0.819664														14.3756
0.7576														19.5343
0.688262														21.7065
0.617989														22.5744
0.539636														25.0093
0.473994														20.8309
0.392971														25.2881
0.323913														21.7059
0.252527														22.289
0.196683														17.3639
0.147242														15.9183
0.120815														9.39887
0.0745826														14.7021
0.044542														11.7246
0.0356285														11.2844
0.050664														8.61367
0.050812														0.374237
0.0531146														3.66545
0.051029														0.915735
0.0512733														0.84708
0.0529939														1.23687
0.0563264														1.19004
0.0569736														0.716561
0.056561														0.625281
0.990501																							3.66424
0.994866																							5.99896
0.99455																							5.84681
0.992227																							2.59052
0.991292																							1.04641
0.986464																							3.11336
0.989354																							1.38646
0.991124																							1.03866
0.994761																							2.08624
0.992683																							0.920866
0.99804																							2.73541
0.997954																							0.218861
0.995704																							1.00152
0.997599																							0.861335
0.999622																							0.95072
0.999588																							0.109089
0.999121																							0.261614
0.999615																							0.764048
0.998775																							0.728988
0.999541																							0.388836
0.998167																							0.624266
0.996181																							1.01891
0.998952																							1.22514
0.99966																							0.524434
0.998146																							0.670032
0.998063																							0.191006
0.997943																							0.235941
1																							0.909441
0.995131																							2.15374
0.990579																							2.05921
0.989313																							0.565242
0.989307																							0.0475792
0.988897																							0.609251
0.988457																							0.609379
0.986373																							1.66038
0.981939																							2.20263
0.967653																							10.6105
0.944974																							12.2514
0.911299																							15.6129
0.868146																							19.0595
0.821641																							20.5501
0.760029																							27.8505
0.701577																							27.6326
0.646097																							25.9564
0.589053																							27.4345
0.529973																							28.8304
0.476937																							25.4062
0.422882																							26.0317
0.364947																							28.2959
0.302278																							28.8023
0.246748																							24.6565
0.197003																							21.9815
0.150794																							20.5516
0.119711																							13.7396
0.110517																							6.24804
0.104143																							4.52607
0.0899333																							7.8735
0.975346																								1.5036
0.975403																								0.0241027
0.981473																								2.5068
0.983122																								1.17573
0.955965																								12.4847
0.955801																								0.308457
0.952136																								3.6138
0.953366																								6.84751
0.963282																								11.4593
0.963217																								0.0268927
0.965928																								3.22448
0.968141																								0.96378
0.972854																								2.91099
0.972807																								0.0500901
0.972894																								0.184099
0.974989																								0.880202
0.976791																								0.961123
0.976726																								0.0346271
0.977967																								0.724154
0.978093																								0.660738
0.979529																								0.826191
0.9798																								1.09245
0.97718																								1.08424
0.977699																								2.31332
0.982457																								4.82641
0.984153																								3.11987
0.984398																								0.278202
0.983799																								0.847894
0.983126																								0.281609
0.982729																								0.738441
0.982408																								0.747498
0.983379																								0.652635
0.983398																								0.00803164
0.975337																								7.37731
0.974356																								0.519795
0.976689																								10.9995
0.976687																								0.00939228
0.968443																								6.41091
0.963539																								6.35043
0.968034																								3.15394
0.968098																								0.0263816
0.971094																								1.32512
0.974032																								1.93923
0.969293																								3.91681
0.969334																								0.0178515
0.967737																								5.76469
0.971919																								11.675
0.974474																								21.3594
0.974414																								0.0263401
0.976326																								9.23149
0.976252																								4.86266
0.981375																								10.2736
0.981381																								0.0309655
0.983799																								5.83412
1																								16.9791
0.995587																								5.66182
0.99607																								0.275224
0.991233																								5.3531
0.979862																								16.3525
0.973981																								7.84381
0.975346																								0.563826
0.973055																								6.41332
0.979978																								19.509
0.979839																								12.6734
0.979827																								0.0050921
0.980709																								9.7738
0.977226																								16.691
0.977283																								0.0248742
0.971953																								8.23116
0.972559																								9.22203
0.947505																								14.6279
0.948317																								0.874486
0.927381																								10.8947
0.901057																								14.7103
0.873939																								20.3082
0.873963																								0.0153869
0.863851																								9.78982
0.85905																								6.90356
0.837783																								24.8151
0.837759																								0.0118971
0.826024																								11.1713
0.820916																								3.03876
0.821064																								6.24429
0.820951																								0.0515678
0.828012																								4.63626
0.836191																								8.1487
0.838667																								1.16486
0.838623																								0.0190988
0.840957																								0.982015
0.840352																								0.78094
0.840313																								0.188861
0.91769																									1.09557
0.918491																									1.16719
0.918119																									1.23549
0.918812																									0.805046
0.919776																									1.20774
0.919191																									2.77788
0.919367																									3.32818
0.921967																									3.5096
0.921385																									2.89574
0.921545																									1.1893
0.923841																									0.896593
0.924875																									1.21092
0.92572																									1.58874
0.92596																									0.599533
0.926083																									0.907298
0.925498																									1.03876
0.927224																									1.66082
0.927247																									1.98951
0.927225																									1.56528
0.927728																									0.292003
0.927293																									1.12557
0.927451																									1.40957
0.93251																									3.46461
0.938735																									2.83403
0.942032																									2.4903
0.946821																									3.33365
0.953438																									3.22494
0.95646																									2.2606
0.956111																									3.5841
0.961356																									6.40594
0.975061																									7.35564
0.989934																									6.59353
0.99676																									4.90285
1																									5.10246
0.996359																									1.42216
0.989344																									3.82767
0.980446																									5.53181
0.966304																									7.88029
0.948712																									10.6563
0.923482																									13.4091
0.897017																									11.2388
0.870338																									12.2092
0.843405																									12.0868
0.820298																									11.4497
0.79101																									12.8356
0.762032																									12.5482
0.738046																									12.1311
0.703391																									14.8954
0.672933																									13.5355
0.642367																									13.6925
0.605019																									15.5231
0.590278																									6.73114
0.580895																									5.36488
0.560913																									7.97478
0.538872																									10.4533
0.517359																									10.6451
0.497315																									9.29478
0.485413																									5.15016
0.478581																									5.24816
0.459106																									12.5368
0.433341																									13.9402
0.409219																									14.3726
0.381497																									12.4838
0.349322																									14.4799
0.321907																									14.3388
0.2933																									11.6491
0.264159																									12.8597
0.23316																									14.6997
0.202721																									15.2399
0.178889																									12.482
0.165062																									7.63214
0.152608																									4.86447
0.140073																									6.68277
0.128567																									11.1503
0.116211																									9.46081
0.119026																									1.14041
0.121387																									1.09098
0.121304																									0.521349
0.121148																									0.190099
0.121176																									0.022132
0.12148																									0.30902
0.12153																									0.0530904
0.121463																									0.117354
0.121474																									0.0340459
0.121584																									0.0530581
0.121591																									0.0179744
0.12209																									0.360287
0.122332																									0.145818
0.121837																									0.306717
0.121898																									0.063866
0.122106																									0.0859273
0.759194																										12.3096
0.74321																										7.58569
0.727594																										7.7022
0.705364																										10.8032
0.698862																										2.57997
0.698458																										0.518854
0.701844																										1.70275
0.701871																										1.67916
0.70133																										0.329413
0.700728																										0.251284
0.700684																										0.142245
0.701614																										0.534803
0.70287																										4.16198
0.703373																										5.91369
0.696566																										6.84921
0.69145																										3.25113
0.693814																										2.54705
0.695257																										2.046
0.691577																										5.61566
0.687708																										4.10767
0.688619																										2.52143
0.691791																										2.78105
0.693619																										3.46064
0.697743																										4.60859
0.695477																										3.31001
0.689689																										2.84515
0.683634																										3.55257
0.670976																										7.31996
0.646127																										15.4759
0.622398																										14.8977
0.602948																										12.1239
0.58843																										11.9686
0.571285																										9.61768
0.5526																										10.9867
0.545916																										11.1769
0.532424																										11.0322
0.516776																										12.0894
0.498129																										14.1121
0.47768																										13.7543
0.456124																										11.7543
0.434007																										14.3461
0.404065																										16.7191
0.373607																										15.5978
0.346479																										14.7319
0.320783																										14.0204
0.300169																										11.9253
0.275182																										10.2879
0.244466																										12.8851
0.221883																										9.16516
0.216515																										2.13985
0.204291																										5.26952
0.195609																										4.72371
0.181901																										5.43988
0.167264																										5.80863
0.147465																										7.94897
0.138185																										3.69874
0.137468																										0.844784
0.137536																										1.82113
0.14234																										2.56942
0.137036																										4.84453
0.134747																										2.40751
0.133964																										1.04756
0.131003																										1.67166
0.11936																										10.5087
0.106694																										11.2156
0.0928048																										7.44479
0.972183																											7.54282
0.985656																											11.0365
0.999792																											11.9616
1																											0.949192
0.996996																											2.27656
0.991656																											3.82632
0.992468																											2.31402
0.98849																											5.36966
0.990473																											6.05353
0.995212																											5.05361
0.997301																											4.6074
0.993724																											5.5387
0.990883																											5.61945
0.991429																											2.07028
0.990922																											1.43035
0.988248																											2.23258
0.986187																											1.67191
0.984914																											0.487112
0.987071																											0.921152
0.977135																											5.18785
0.957611																											7.9291
0.935699																											9.47888
0.909008																											12.063
0.88925																											9.35386
0.872599																											8.75869
0.856225																											6.71772
0.829464																											10.5174
0.79518																											13.4357
0.754353																											15.6594
0.717832																											13.9799
0.675239																											16.4461
0.633751																											16.1357
0.595779																											15.0167
0.556914																											15.2402
0.530795																											12.2358
0.502703																											12.1217
0.464345																											17.1071
0.42099																											18.9256
0.380527																											18.1618
0.336531																											18.5407
0.300528																											15.3489
0.264127																											16.4745
0.239157																											11.5154
0.21224																											11.8919
0.180686																											14.6519
0.157148																											14.5085
0.14793																											7.88534
0.134796																											6.6251
0.128123																											5.80437
0.131679																											2.66585
0.137938																											2.94579
0.141156																											1.22996
0.1455																											4.72435
0.146241																											0.630418
0.142464																											1.79179
0.143412																											0.417226
0.145981																											1.15905
0.157659																											4.79583
0.171632																											5.59869
0.192567																											8.38969
0.203255																											4.76529
0.210885																											4.47919
0.22256																											4.88947
0.245665																											9.61784
0.266691																											9.57829
0.280142																											5.44918
0.296298																											7.05672
0.311559																											5.81217
0.317751																											2.37935
0.321299																											1.50001
0.330964																											3.6907
0.335326																											1.67432
0.334191																											0.476143
0.33254																											0.640708
0.331047																											0.570684
0.333185																											0.838961
0.335346																											0.842917
0.333108																											0.93877
0.33328																											0.226319
0.333525																											0.378791
0.332387																											0.444159
0.33419																											1.75491
0.33344																											0.357244
0.332963																											0.234897
0.331791																											1.28974
0.311783																											8.77098
0.290236																											9.02154
0.304168																											7.09651
0.313021																											4.16354
0.322002																											3.89819
0.333105																											7.15071
0.868774																												2.51947
0.872561																												2.35629
0.884466																												7.17683
0.894419																												6.98565
0.895778																												0.977846
0.888754																												3.63725
0.888371																												4.76018
0.889509																												11.9933
0.893141																												1.99823
0.893982																												0.426063
0.894223																												0.320191
0.89281																												1.38693
0.891943																												0.467486
0.892101																												0.682656
0.893198																												0.870809
0.894235																												3.81207
0.899994																												7.81736
0.906968																												5.94482
0.913773																												6.77967
0.919173																												4.69346
0.924626																												4.01798
0.933701																												5.21389
0.939581																												4.31423
0.948425																												5.15586
0.949352																												0.725002
0.951039																												5.41022
0.961226																												7.1678
0.969216																												3.70046
0.971058																												1.0398
0.971266																												1.04836
0.972637																												1.78682
0.975907																												2.14205
0.977279																												1.13457
0.979136																												4.90742
0.986676																												3.28402
0.98883																												2.75673
0.98979																												1.92657
0.991662																												1.62233
0.992896																												1.48137
0.991826																												0.439127
0.991703																												1.16203
0.991986																												1.09657
0.992258																												0.411043
0.992325																												0.245759
0.991961																												1.06839
0.993189																												0.488858
0.997102																												1.5409
0.998863																												0.775937
1																												0.479005
0.999849																												0.44717
0.998666																												0.57845
0.998667																												0.226245
0.998387																												0.331063
0.998376																												0.146296
0.998891																												0.360832
0.997859																												0.73999
0.989597																												5.09523
0.985138																												2.64474
0.983292																												5.58074
0.975899																												9.63629
0.979402																												6.9894
0.976581																												5.06586
0.969601																												8.00109
0.971343																												7.53708
0.972213																												5.25306
0.969725																												7.58947
0.959801																												9.07414
0.950646																												9.99814
0.935911																												11.831
0.920446																												14.5874
0.904526																												11.5646
0.891611																												13.4802
0.879031																												14.1539
0.864351																												13.8663
0.854604																												14.8629
0.838494																												16.377
0.825266																												12.9652
0.809838																												10.2547
0.788944																												10.4951
0.763418																												11.8384
0.741136																												10.3594
0.731753																												5.65806
0.715642																												8.98275
0.693031																												11.246
0.669589																												12.4462
0.6405																												14.0012
0.609585																												14.022
0.586604																												11.7994
0.564411																												13.1676
0.547491																												15.6455
0.533118																												14.7352
0.86313																													12.7223
0.854182																													14.9338
0.82954																													17.2761
0.827182																													14.6732
0.818039																													8.88999
0.798182																													10.2346
0.786673																													9.15669
0.771786																													12.8075
0.75691																													14.8231
0.737672																													13.7243
0.689595																													13.3536
0.64323																													12.6688
0.599457																													12.8512
0.553986																													14.9146
0.50932																													12.9714
0.459658																													12.2697
0.410777																													12.0114
0.365484																													11.1673
0.313448																													12.81
0.282966																													7.92459
0.251973																													7.89645
0.229158																													5.61014
0.197696																													7.8555
0.171999																													6.40131
0.143684																													7.11252
0.13157																													3.00419
0.124744																													1.70482
0.116775																													1.99383
0.117847																													0.320852
0.119384																													0.398413
0.114221																													1.32072
0.11039																													1.42974
0.991621																														0.926311
0.991561																														0.369705
0.991058																														0.887564
0.991705																														0.533761
0.991788																														0.0377223
0.991817																														0.0458018
0.99073																														0.595614
0.989551																														0.5432
0.987165																														1.01314
0.989365																														0.975648
0.991545																														1.23263
0.996416																														2.20395
0.995497																														0.882426
0.993578																														0.948088
0.994907																														0.87936
0.997867																														1.33691
1																														0.995567
0.991383																														3.96817
0.981942																														4.25025
0.979049																														1.32264
0.979064																														0.981161
0.980933																														1.40434
0.981425																														0.328614
0.985888																														1.92938
0.985548																														0.146626
0.980881																														2.34047
0.973277																														3.37208
0.969677																														3.55641
0.962404																														3.32709
0.956664																														3.55033
0.949345																														3.75826
0.938756																														4.55635
0.924313																														6.1361
0.918888																														2.29563
0.916144																														1.42067
0.914498																														1.04051
0.912191																														1.01298
0.913392																														0.559637
0.912725																														0.447464
0.898084																														6.25437
0.876167																														9.82247
0.855095																														9.28766
0.851156																														1.9975
0.847945																														1.81874
0.84616																														0.813482
0.847735																														0.690497
0.840134																														3.2391
0.815257																														10.6899
0.795567																														8.47283
0.780818																														6.41119
0.75974																														10.4277
0.726508																														14.6984
0.684576																														18.2377
0.641387																														18.6516
0.620007																														9.75255
0.620263																														2.29465
0.624848																														1.94129
0.624837																														0.94608
0.623027																														1.67472
0.620038																														2.20093
0.614794																														2.3008
0.604775																														4.24492
0.589952																														6.47781
0.563465																														11.8382
0.549055																														6.63121
0.537338																														5.04112
0.522256																														6.84704
0.50041																														9.93625
0.465069																														15.1908
0.425583																														17.0979
0.384174																														18.187
0.340272																														19.1987
0.297764																														18.366
0.255933																														18.0562
0.205713																														21.61
0.161822																														18.8576
0.129747																														13.7901
0.111909																														7.97324
0.930392																															13.9751
0.910187																															10.7864
0.897088																															8.32718
0.884539																															7.75882
0.889378																															4.68666
0.890135																															3.14974
0.891525																															2.80391
0.888522																															1.24833
0.888734																															0.259193
0.886933																															1.35414
0.886356																															0.248822
0.884957																															1.09707
0.885136																															0.0834854
0.884967																															0.312374
0.88439																															0.26544
0.884155																															0.701521
0.883889																															0.316159
0.88392																															0.165334
0.884327																															0.174441
0.884864																															0.356359
0.885191																															0.25054
0.885122																															0.0997379
0.88506																															0.141666
0.884955																															0.426474
0.884436																															1.29858
0.884788																															0.187361
0.889779																															2.85626
0.892755																															1.22569
0.893513																															1.98866
0.890515																															7.47245
0.876782																															9.73102
0.858476																															13.0176
0.84472																															15.072
0.831604																															17.1274
0.829049																															18.8435
0.827713																															20.5319
0.830568																															17.9465
0.82458																															19.1949
0.821098																															16.7363
0.821922																															16.6661
0.823521																															13.5004
0.823725																															15.0717
0.821854																															10.7547
0.822893																															6.71791
0.812916																															8.30607
0.802049																															11.6979
0.798206																															10.5326
0.788759																															9.1278
0.77702																															8.42491
0.771489																															4.21281
0.769385																															2.46682
0.758488																															4.42734
0.750984																															3.32561
0.745502																															2.13702
0.739342																															2.473
0.738654																															0.419498
0.740934																															0.941409
0.739063																															0.736895
0.742291																															1.26146
0.744124																															0.834901
0.744092																															0.187774
0.743086																															0.41095
0.743813																															0.344187
0.743743																															0.0584916
0.743323																															0.23479
0.74432																															0.599592
0.744632																															0.147269
0.74497																															0.158429
0.745005																															0.366987
0.74361																															0.710611
0.743897																															0.227755
0.742806																															0.435195
0.743965																															0.614639
0.743132																															0.438329
0.74074																															0.953526
0.741124																															0.531765
0.744295																															1.77208
0.743314																															1.04697
0.740945																															1.04091
0.742047																															0.445217
0.742656																															0.474591
0.746492																															1.49452
0.748339																															1.23698
0.747593																															0.458431
0.745001																															1.00941
0.745839																															0.329169
0.74548																															0.190682
0.745171																															0.129648
0.747516																															1.01514
0.746421																															0.465961
0.745959																															0.428754
0.418176																																1.49167
0.39387																																1.17805
0.350262																																2.13798
0.317786																																1.84251
0.293782																																1.16029
0.266979																																2.0921
0.261518																																0.761521
0.266462																																0.509012
0.255857																																0.5883
0.242196																																0.681156
0.241838																																3.90479
0.222227																																2.85068
0.175471																																2.3457
0.167126																																2.59049
0.143841																																1.26731
0.110015																																1.73124
0.0703215																																2.93437
0.0783822																																0.421259
0.0846725																																0.554995
0.0767078																																0.762626
0.0770139																																0.582691
0.0819294																																0.312436
0.0853598																																3.34123
0.0897681																																1.92095
0.15801																																3.38734
0.213293																																2.87378
0.405333																																9.3132
0.569984																																8.57137
0.606493																																1.80541
0.599754																																0.962918
0.938851																																	11.2224
0.960722																																	10.0625
0.976855																																	9.92747
0.990764																																	7.81976
0.99725																																	6.79522
1																																	14.2688
0.992564																																	15.5746
0.989102																																	12.9597
0.982886																																	10.0098
0.971613																																	6.98871
0.956877																																	7.41421
0.93331																																	11.2696
0.893946																																	16.9419
0.860742																																	14.5434
0.820477																																	16.8522
0.778471																																	19.3992
0.743495																																	16.0527
0.714525																																	13.9198
0.723465																																	3.75585
0.734808																																	4.94001
0.735562																																	0.441623
0.729342																																	4.74366
0.709889																																	8.53938
0.68951																																	8.75522
0.664651																																	11.6826
0.642034																																	9.63999
0.627316																																	5.67352
0.625889																																	0.996902
0.624644																																	0.580234
0.622554																																	1.41683
0.620905																																	1.11158
0.623898																																	1.23858
0.627687																																	1.51593
0.635001																																	2.81944
0.641714																																	2.59038
0.643159																																	0.563132
0.644891																																	0.91879
0.645989																																	0.424913
0.646021																																	0.0554313
0.646192																																	0.0766933
0.646197																																	0.0124597
0.646798																																	0.242638
0.646175																																	0.240241
0.644942																																	0.475336
0.636652																																	3.2357
0.620057																																	6.55846
0.603082																																	6.63277
0.576992																																	10.3703
0.545448																																	12.8241
0.507621																																	15.0607
0.471112																																	14.1218
0.433278																																	14.8066
0.393776																																	15.5785
0.355355																																	14.8138
0.322242																																	13.0789
0.293689																																	11.0306
0.274623																																	7.35493
0.266477																																	3.23664
0.264347																																	0.980314
0.250931																																	5.31419
0.236431																																	5.996
0.978722																																		4.59415
0.986344																																		4.12283
0.994142																																		2.98884
1																																		2.44526
0.992286																																		2.94949
0.981785																																		4.04871
0.976549																																		3.20627
0.965699																																		7.61005
0.956279																																		10.288
0.947325																																		14.7332
0.934588																																		15.5101
0.924747																																		14.1395
0.918125																																		5.82249
0.915828																																		2.15281
0.917255																																		0.765563
0.909898																																		3.83498
0.89216																																		11.9238
0.876246																																		13.1575
0.857445																																		14.4815
0.836663																																		14.1502
0.815443																																		16.286
0.800216																																		14.846
0.779633																																		13.9642
0.765915																																		13.8402
0.757678																																		16.7976
0.746575																																		10.8634
0.743865																																		9.93947
0.738842																																		7.59503
0.741673																																		8.06577
0.7366																																		9.85785
0.738142																																		9.14851
0.733764																																		10.3801
0.720674																																		9.89825
0.708808																																		7.94378
0.69663																																		6.62193
0.687861																																		7.36066
0.66775																																		12.5252
0.658854																																		8.47852
0.647562																																		11.8883
0.637134																																		9.60528
0.630852																																		4.05981
0.622398																																		4.03772
0.616917																																		6.78222
0.612108																																		5.33619
0.599992																																		5.50861
0.579414																																		9.41904
0.561388																																		8.5425
0.532135																																		12.0229
0.518863																																		6.19416
0.501674																																		7.24932
0.492137																																		5.26475
0.479197																																		8.24544
0.469318																																		4.77821
0.457252																																		6.7949
0.441814																																		8.90161
0.426994																																		7.6548
0.41402																																		5.45244
0.411365																																		1.85551
0.414156																																		1.14995
0.417297																																		1.80047
0.410433																																		4.77763
0.394734																																		6.08927
0.37904																																		5.94131
0.358579																																		7.76539
0.347232																																		4.38935
0.34554																																		1.11182
0.340944																																		1.87986
0.340864																																		0.708548
0.346128																																		2.23608
0.342781																																		2.90149
0.340723																																		0.785111
0.334938																																		2.6992
0.316784																																		7.83218
0.285675																																		12.2441
0.252373																																		13.3514
0.229104																																		9.1467
0.201344																																		11.4367
0.178607																																		8.64104
0.163613																																		5.90004
0.156751																																		4.05351
0.150037																																		2.9474
0.144688																																		2.00614
0.141967																																		1.18614
0.136256																																		3.21104
0.134088																																		0.920187
0.134064																																		0.132498
0.136047																																		1.88566
0.135315																																		2.09871
0.134982																																		2.09251
0.1324																																		1.00516
0.132377																																		1.52861
0.979489																																			3.43791
0.969825																																			5.80422
0.954503																																			7.39672
0.953745																																			1.39118
0.959045																																			2.28391
0.960629																																			0.756475
0.96056																																			0.111839
0.960477																																			0.0361748
0.967455																																			3.22871
0.974635																																			3.09522
0.977695																																			1.39226
0.976612																																			1.06328
0.979931																																			2.73501
0.984914																																			4.09386
0.987944																																			1.73302
0.989542																																			0.75074
0.989484																																			0.269092
0.99054																																			0.818526
0.991147																																			0.339144
0.992045																																			0.393123
0.991288																																			0.347165
0.991359																																			0.336652
0.993262																																			0.955942
0.994415																																			1.40053
0.989181																																			3.29932
0.985933																																			2.17473
0.992788																																			3.37213
0.995951																																			1.41285
0.998526																																			1.11433
0.999363																																			1.05111
1																																			0.440721
0.988346																																			5.74244
0.977673																																			4.73376
0.976227																																			5.61883
0.969674																																			9.36341
0.969863																																			6.92218
0.966108																																			10.046
0.963622																																			9.41594
0.953605																																			13.1609
0.947873																																			6.93221
0.944915																																			3.35624
0.945575																																			3.36311
0.947237																																			8.92408
0.951734																																			7.59104
0.955829																																			8.21688
0.952518																																			12.4576
0.950328																																			10.8721
0.944521																																			5.26264
0.943059																																			4.8507
0.939644																																			9.52997
0.935794																																			3.38681
0.935118																																			0.600427
0.932225																																			1.27651
0.928562																																			4.07766
0.920036																																			7.43881
0.913327																																			6.91957
0.911395																																			1.27918
0.912257																																			0.536608
0.913005																																			0.339106
0.912726																																			0.4385
0.908603																																			5.87423
0.898527																																			8.2916
0.887784																																			7.80923
0.880912																																			8.49386
0.877464																																			6.85121
0.877475																																			5.53777
0.875549																																			1.89371
0.872627																																			2.52388
0.873919																																			2.15591
0.874425																																			0.986449
0.877045																																			1.7041
0.884199																																			4.07332
0.895224																																			5.55507
0.89928																																			4.92418
0.907175																																			4.55296
0.911508																																			2.8701
0.914317																																			3.37171
0.917354																																			2.7518
0.916755																																			1.07593
0.916981																																			1.43409
0.912947																																			2.8686
0.908281																																			2.68457
0.907214																																			0.836831
0.908636																																			1.1405
0.912088																																			1.6859
0.912057																																			0.361693
0.911234																																			0.515655
0.913335																																			0.915431
0.912607																																			0.380345
0.912752																																			0.736744
0.91418																																			2.7369
0.881804																																				0.783062
0.888707																																				2.65583
0.892344																																				1.39471
0.896007																																				2.12734
0.899163																																				1.98171
0.909603																																				5.55834
0.92191																																				6.1653
0.932548																																				5.31543
0.943621																																				5.24795
0.951299																																				6.25775
0.961924																																				6.33054
0.963025																																				6.36499
0.969856																																				7.69207
0.973871																																				14.5036
0.980883																																				12.9468
0.986851																																				10.8147
0.997052																																				13.9021
1																																				10.7552
0.998339																																				10.2781
0.994943																																				10.0081
0.979564																																				13.1662
0.962503																																				17.0977
0.942709																																				16.0836
0.9291																																				20.0904
0.913871																																				16.1099
0.888694																																				13.9361
0.849612																																				16.8713
0.812222																																				13.8185
0.76794																																				15.788
0.76829																																				1.65732
0.763426																																				1.9402
0.698947																																				22.7583
0.631235																																				23.6141
0.569812																																				21.5886
0.499096																																				24.6765
0.427925																																				24.8675
0.359439																																				24.0641
0.291507																																				23.7461
0.227235																																				22.801
0.157002																																				25.0231
0.112277																																				16.5181
0.0133435																																				13.1572
0.0127284																																				10.8769
0.0130519																																				9.38575
0.0110554																																				3.45562
0.0121261																																				2.27133
0.0140116																																				3.95393
0.0139463																																				4.62506
0.0125788																																				2.49477
0.0145872																																				0.905585
0.989685																																					0.989685
1																																					1
0.997553																																					0.997553
0.992063																																					0.992063
0.948988																																					0.948988
0.878171																																					0.878171
0.817122																																					0.817122
0.719608																																					0.719608
0.615008																																					0.615008
0.540907																																					0.540907
0.527605																																					0.527605
0.544116																																					0.544116
0.552196																																					0.552196
0.538369																																					0.538369
0.51608																																					0.51608
0.504757																																					0.504757
0.475386																																					0.475386
0.450256																																					0.450256
0.403756																																					0.403756
0.403625																																					0.403625
0.394512																																					0.394512
0.442045																																					0.442045
0.500419																																					0.500419
0.501579																																					0.501579
0.500158																																					0.500158
0.415859																																					0.415859
0.320054																																					0.320054
0.237825																																					0.237825
0.189408																																					0.189408
0.196629																																					0.196629
0.2305																																					0.2305
0.226754																																					0.226754
0.212103																																					0.212103
0.229879																																					0.229879
0.215406																																					0.215406
0.222776																																					0.222776
0.23777																																					0.23777
0.2418																																					0.2418
0.223771																																					0.223771
0.205674																																					0.205674
0.24352																																					0.24352
0.294256																																					0.294256
0.334517																																					0.334517
0.362596																																					0.362596
0.407335																																					0.407335
0.452659																																					0.452659
0.47757																																					0.47757
0.489382																																					0.489382
0.510895																																					0.510895
0.506225																																					0.506225
0.505912																																					0.505912
0.542301																																					0.542301
0.620353																																					0.620353
0.622194																																					0.622194
0.613772																																					0.613772
0.6122																																					0.6122
0.601771																																					0.601771
0.592521																																					0.592521
0.553076																																					0.553076
0.528429																																					0.528429
0.533055																																					0.533055
0.540704																																					0.540704
0.535954																																					0.535954
0.519663																																					0.519663
0.433884																																					0.433884
0.395231																																					0.395231
0.364564																																					0.364564
0.329953																																					0.329953
0.333892																																					0.333892
0.325571																																					0.325571
0.300061																																					0.300061
0.288766																																					0.288766
0.294625																																					0.294625
0.290933																																					0.290933
0.291686																																					0.291686
0.289952																																					0.289952
0.285329																																					0.285329
0.291456																																					0.291456
0.306387																																					0.306387
0.329351																																					0.329351
0.366937																																					0.366937
0.387516																																					0.387516
0.394206																																					0.394206
0.399537																																					0.399537
0.399596																																					0.399596
0.386641																																					0.386641
0.406845																																					0.406845
0.392803																																					0.392803
0.367243																																					0.367243
0.309498																																					0.309498
0.324035																																					0.324035
0.958767																																						0.42501
0.95919																																						0.233589
0.958601																																						0.262805
0.957292																																						0.53626
0.957936																																						0.274638
0.962819																																						1.75923
0.96561																																						2.21502
0.9623																																						4.36989
0.962373																																						8.31675
0.958518																																						6.00392
0.95583																																						7.94766
0.958762																																						4.78685
0.960126																																						0.773239
0.958959																																						1.13826
0.959214																																						0.543295
0.958827																																						1.63408
0.955356																																						2.56903
0.951623																																						1.3906
0.944747																																						3.05838
0.939867																																						3.41216
0.936293																																						3.71841
0.93156																																						2.46408
0.925259																																						4.35895
0.921107																																						2.06087
0.920496																																						4.66166
0.92637																																						3.3253
0.930727																																						6.61264
0.933992																																						7.30729
0.939863																																						7.53123
0.949278																																						9.25001
0.957722																																						6.00316
0.963932																																						4.82849
0.966267																																						3.29679
0.967815																																						3.74596
0.973814																																						2.60896
0.97615																																						1.0614
0.977113																																						0.346628
0.9759																																						0.435553
0.986558																																						4.5783
0.987824																																						0.645491
0.988347																																						0.216266
0.988136																																						0.27616
0.986929																																						0.435174
0.975471																																						4.47124
0.968599																																						4.67469
0.963304																																						2.53788
0.963943																																						0.319259
0.965824																																						0.710588
0.969937																																						1.4935
0.974946																																						1.80216
0.976226																																						1.53017
0.979926																																						1.36618
0.98222																																						0.826083
0.982688																																						0.226642
0.982766																																						0.0626033
0.982526																																						0.20973
0.983301																																						0.506959
0.983181																																						0.0605282
0.981227																																						0.734707
0.981503																																						0.175856
0.981588																																						0.0310177
0.981509																																						0.0638136
0.978427																																						1.11841
0.962185																																						5.97488
0.943649																																						7.14457
0.934349																																						3.34007
0.946466																																						5.26279
0.95202																																						7.04825
0.950517																																						7.67295
0.956406																																						10.1345
0.96746																																						14.9372
0.967466																																						0.00279815
0.967709																																						8.83607
0.970132																																						9.81818
0.983966																																						14.3164
0.984039																																						0.0733094
0.988461																																						5.48478
0.998322																																						6.7231
0.999971																																						0.831535
1																																						0.0119514
0.988139																																						4.4992
0.98077																																						2.76801
0.974596																																						2.31494
0.97457																																						0.0113811
0.962674																																						4.48475
0.955116																																						3.0571
0.955062																																						2.03526
0.947515																																						2.75042
0.921424																																						9.61614
0.881559																																						14.367
0.837825																																						15.7047
0.941592																																							1.02644
0.940963																																							0.335927
0.938169																																							1.19688
0.93826																																							0.454359
0.933094																																							3.17296
0.929748																																							1.16629
0.929783																																							0.0770271
0.93																																							0.273947
0.927362																																							1.16853
0.927364																																							0.399448
0.926385																																							0.856039
0.931066																																							1.55477
0.932872																																							0.913598
0.930267																																							0.823063
0.92328																																							3.30275
0.91168																																							4.40291
0.900906																																							7.08191
0.885921																																							5.47569
0.870315																																							6.25765
0.85925																																							7.48396
0.851109																																							4.49323
0.838019																																							6.29068
0.828256																																							4.32939
0.832159																																							2.80608
0.826782																																							3.52157
0.825805																																							1.18959
0.826075																																							0.324968
0.825201																																							0.274371
0.825085																																							0.227159
0.825572																																							3.20731
0.821235																																							2.85868
0.824196																																							2.14257
0.824375																																							1.35781
0.826656																																							1.07974
0.82754																																							0.389997
0.827682																																							0.97433
0.827549																																							1.76617
0.827305																																							0.449486
0.827374																																							0.128499
0.827928																																							0.306363
0.828838																																							0.355372
0.824719																																							6.92704
0.817413																																							3.79365
0.806946																																							3.21045
0.796283																																							4.14025
0.780788																																							5.72777
[truncated: 955 more rows]
[truncated: 5 more columns]

## Sheet: ED Fig 11B
ED Fig 11 B
Normalized distance
	GFP- Theta																							ArchT-Theta
0.955937	48.7539
0.955938	48.7692
0.946867	51.0493
0.949814	64.3868
0.951428	76.4696
0.951447	76.456
0.950026	73.9152
0.949849	75.0468
0.952081	74.4275
0.952058	74.9795
0.921172	40.5765
0.881619	45.6892
0.846071	43.9758
0.796416	37.6217
0.75166	54.0524
0.732708	60.7646
0.732719	60.784
0.678226	60.665
0.652387	48.9294
0.618879	30.8431
0.582634	22.917
0.513993	12.2258
0.447007	18.1422
0.37007	11.1508
0.313237	24.1524
0.25417	10.2564
0.213755	23.0442
0.165021	17.5143
0.127495	33.7013
0.106625	38.9396
0.0850776	35.0382
0.800963		1.88094
0.750705		4.19023
0.705249		2.68285
0.67625		0.520776
0.647509		13.2465
0.615763		14.6116
0.581313		20.5862
0.537401		28.8461
0.491089		19.1016
0.452283		23.2629
0.409163		26.0421
0.359911		31.3327
0.323461		32.562
0.306031		31.3931
0.277602		26.7855
0.241559		24.7501
0.208061		24.4176
0.177456		27.3811
0.161582		21.6632
0.155802		16.6402
0.143525		1.99251
0.115026		0.562005
0.0967288		4.11828
0.0789987		1.4222
0.698765			4.4231
0.636124			3.39289
0.568265			1.4416
0.498			4.44519
0.427476			2.53112
0.361471			1.70299
0.292829			3.00065
0.227034			0.569367
0.168413			4.18055
0.907325				12.8972
0.881695				11.3346
0.855309				8.18562
0.823948				8.25954
0.785603				11.869
0.756179				16.849
0.734929				31.452
0.730847				33.7541
0.730988				22.7285
0.727019				6.92909
0.690429				15.2885
0.645389				19.3047
0.602152				14.9278
0.545245				18.9079
0.492105				26.098
0.445108				34.8223
0.397635				37.5871
0.349979				34.7285
0.308539				42.1545
0.279646				39.3548
0.248741				34.0449
0.220819				39.9783
0.204184				33.2807
0.189407				29.2064
0.166443				19.765
0.149278				20.9944
0.125391				20.2377
0.115336				20.2374
0.108885				20.3716
0.111774				14.891
0.114541				3.15535
0.113034				19.1685
0.108703				19.5457
0.106118				25.2657
0.101221				22.3981
0.10045				19.5775
0.104075				24.4075
0.104065				25.0124
0.103422				24.5272
0.103343				22.7065
0.102369				22.8745
0.958773					75.7025
0.961523					78.0266
0.963334					79.3133
0.963613					54.036
0.958434					41.4107
0.95278					28.2223
0.949764					22.9915
0.94372					21.4267
0.94554					19.9911
0.951971					19.2364
0.954138					22.3273
0.955388					35.5278
0.94943					47.8503
0.940883					57.6742
0.932936					55.0751
0.921852					45.0215
0.906377					36.1889
0.881868					34.228
0.859949					45.2781
0.839378					40.8211
0.816942					32.6317
0.788878					27.9441
0.757531					20.4236
0.727637					28.2937
0.699503					28.0087
0.668843					34.4947
0.641516					39.1065
0.615858					44.8146
0.590344					48.8304
0.570252					49.3222
0.547231					41.2069
0.521928					50.0025
0.496545					39.3428
0.469553					44.1906
0.44327					34.7587
0.412854					36.4852
0.385458					32.3253
0.357762					34.7633
0.333697					27.9857
0.307079					15.1941
0.280691					8.41024
0.259022					12.2721
0.237212					2.88461
0.217822					8.28006
0.190851					2.99767
0.163639					11.2328
0.136131					5.3403
0.113462					3.21438
0.112709					2.12085
0.113574					1.84934
0.11353					3.3899
0.993856						98.1397
0.992637						102.07
0.991651						97.8595
0.993289						91.0246
0.990703						46.0414
0.98131						45.1666
0.969731						12.4868
0.935024						13.2649
0.895466						5.42631
0.851212						8.25392
0.813266						0.694711
0.76996						14.7595
0.720274						8.48797
0.664474						11.3448
0.620133						2.22941
0.572						2.63463
0.514611						6.31174
0.463193						8.87496
0.409967						11.0534
0.367902						21.0978
0.329994						22.57
0.291693						25.9106
0.256923						12.7313
0.210767						12.7193
0.175023						14.6687
0.144005						11.8969
0.112705						13.78
0.0941394						15.388
0.0760419						22.8788
0.0730001						32.3976
0.0687339						32.7167
0.942383							56.693
0.919419							42.1503
0.89598							40.1084
0.886473							45.2426
0.871425							67.7062
0.869632							75.2663
0.862646							82.5301
0.858157							90.8476
0.86538							85.8296
0.866063							84.9712
0.864833							85.434
0.866831							82.9501
0.856288							62.195
0.829906							39.0139
0.823422							52.3665
0.819229							55.5856
0.809561							64.8734
0.804352							58.2451
0.806081							30.7362
0.802122							11.176
0.790881							16.4605
0.78063							13.0751
0.782148							18.9605
0.779432							31.294
0.764364							28.805
0.743445							29.5296
0.720417							22.2332
0.68174							23.1299
0.641362							20.7218
0.604407							23.8263
0.566466							23.4694
0.533396							21.9073
0.498382							21.4883
0.458806							15.8292
0.420101							18.7542
0.379347							14.416
0.336717							7.90272
0.308124							11.1022
0.26864							10.1467
0.229858							18.9414
0.200002							20.445
0.168251							20.1359
0.147159							10.4423
0.122885							7.88804
0.103445							23.2739
0.103148							25.7203
0.097414							13.7446
0.0914816							12.4352
0.088233							12.7026
0.0783145							7.46277
0.0676447							2.15216
							8.80259
0.990333								158.714
0.99166								163.454
0.993574								168.607
0.99649								168.285
0.995782								165.844
1								160.121
0.999803								159.272
0.998962								155.545
0.998801								155.889
0.996193								160.968
0.990377								152.835
0.985161								140.44
0.988987								128.077
0.98767								122.778
0.987202								111.781
0.980508								63.0972
0.967184								42.7113
0.956523								42.1739
0.939411								38.5965
0.924708								39.2132
0.92085								23.286
0.919574								1.54016
0.898948								26.6089
0.883514								39.623
0.863306								42.493
0.846223								45.0683
0.829299								40.3886
0.796899								31.6322
0.764733								19.8127
0.72182								25.4141
0.68179								17.7333
0.634756								18.5644
0.580909								14.2674
0.527831								12.7286
0.478257								10.1933
0.431192								22.3103
0.379464								12.3588
0.33063								14.1038
0.279282								10.3955
0.2333								8.9395
0.184973								0.842475
0.143208								9.81654
0.945635									162.709
0.964583									177.457
0.983118									176.577
0.993578									167.013
1									156.932
0.993754									133.889
0.99478									97.8666
0.994575									67.4887
0.987162									65.5294
0.983922									63.2308
0.973929									66.1856
0.966137									50.3392
0.952695									47.0759
0.932294									29.9594
0.904269									26.6662
0.866615									23.2931
0.83477									31.1168
0.806666									43.5493
0.784033									80.9233
0.784016									80.9462
0.782175									92.492
0.790265									97.3822
0.797454									100.783
0.797552									100.91
0.824497									133.059
0.839372									133.458
0.852285									126.245
0.865071									119.272
0.871447									114.24
0.870273									123.337
0.869853									124.226
0.867069									130.543
0.868591									163.207
0.871461									170.067
0.882227									171.581
0.90145									167.855
0.914943									165.834
0.916902									170.819
0.930229									167.973
0.947279									160.996
0.963226									156.452
0.972046									154.472
0.974237									152.931
0.978283									149.509
0.982509									147.155
0.977017									153.631
0.984951									148.443
0.985042									149.444
0.985277									153.52
0.978237									154.619
0.979839									153.078
0.980005									152.126
0.979924									150.452
0.984321									141.896
0.977254									151.367
0.966956									27.2262
0.96949									29.836
0.987255									147.704
0.981794									173.024
0.963205									160.213
0.943395									123.862
0.933018									92.8987
0.926378									71.6465
0.926417									67.4946
0.927112									58.7313
0.922935									61.5736
0.913914									53.4272
0.910363									36.4611
0.899199									5.18652
0.871292									8.58143
0.842413									7.84377
0.80631									3.6798
0.772294									2.83208
0.729998									5.04945
0.692583									5.72054
0.662664									13.8137
0.624712									2.9249
0.578776									4.87072
0.525024									1.91241
0.472724									1.40346
0.415967									5.54351
0.361739									2.42698
0.310398									4.668
0.2641									0.436234
0.173478									1.4015
0.173429									1.34192
0.152177									1.53745
0.126342									1.69836
0.0847678									1.00902
0.0847972									0.901452
0.972466										130.604
0.974249										127.925
0.975065										127.903
0.974133										128.604
0.970464										119.479
0.970495										122.723
0.968581										123.832
0.967835										127.994
0.972509										129.049
0.968734										128.988
0.968791										139.364
0.968702										134.694
0.964477										144.448
0.97115										157.104
0.969237										157.682
0.965318										158.076
0.973756										155.283
0.973799										164.46
0.975755										164.447
0.978131										156.608
0.978428										161.575
0.979813										154.663
0.979653										168.125
0.980888										167.54
0.980884										167.993
0.98186										165.23
0.980265										166.036
0.981553										166.195
0.980187										165.165
0.979949										163.061
0.977853										172.022
0.973344										171.745
0.974939										169.603
0.967595										167.917
0.968348										167.756
0.972848										170.917
0.981185										169.849
0.998553										178.41
0.998464										178.431
1										178.707
0.992212										177.455
0.993962										146.964
0.995091										146.23
0.984306										81.8776
0.964012										81.934
0.943887										80.3904
0.923059										17.6194
0.888904										0.500066
0.852924										6.7406
0.81696										15.903
0.807988										34.7188
0.805129										29.6996
0.785369										6.6195
0.758194										21.1162
0.713518										28.9583
0.64218										28.623
0.547044										20.4642
0.480529										26.2023
0.40025										7.85153
0.317435										17.0035
0.254328										1.24454
0.229063										3.74945
0.202834										3.22658
0.976313											108.109
0.986932											114.691
0.99481											111.017
0.99388											106.337
0.995188											103.992
0.99895											117.834
1											118.789
0.999836											116.128
0.99966											112.906
0.995945											106.838
0.991043											61.0744
0.971301											40.7185
0.946797											17.2535
0.916045											15.4513
0.887128											11.7573
0.853791											6.94435
0.835466											2.24161
0.828334											2.08408
0.814564											7.24044
0.797232											16.0249
0.7595											2.95161
0.719377											3.98948
0.672327											13.2913
0.625063											14.6392
0.576377											23.8229
0.52495											12.5121
0.487493											12.8403
0.435746											12.446
0.386316											13.158
0.336206											6.99792
0.290699											11.2323
0.248835											4.82896
0.208613											0.711198
0.177839											0.0425413
0.145512											1.69183
0.13196											6.42493
0.128819											7.85666
0.122876											3.10093
0.677047												178.829
0.68649												179.118
0.688962												173.305
0.689383												173.565
0.690441												177.358
0.699562												173.833
0.701108												178.615
0.703194												179.294
0.702719												179.697
0.700752												178.436
0.699924												177.708
0.699625												177.947
0.699533												177.435
0.699658												177.236
0.700349												179.063
0.685697												155.651
0.683891												128.554
0.702417												116.316
0.705189												70.7219
0.708256												87.3361
0.716943												80.0738
0.736138												140.419
0.74963												143.304
0.769322												143.239
0.79064												128.363
0.804251												60.4037
0.818362												127.5
0.825017												128.074
0.823609												146.647
0.829044												156.4
0.8295												156.382
0.833321												160.338
0.84353												154.282
0.852572												153.935
0.861679												154.762
0.890162												147.36
0.912166												151.248
0.93248												162.457
0.957719												159.252
0.965574												153.604
0.974389												162.907
0.982216												175.095
0.98304												173.127
0.98155												174.315
0.979935												170.985
0.977383												172.395
0.976801												168.09
0.977431												176.696
0.985386												179.028
0.996254												177.591
0.992213												167.279
0.987881												166.001
0.982287												160.084
1												160.952
0.995976												161.785
0.993699												161.27
0.998372												151.526
0.998314												151.453
0.998312												151.463
0.998312												151.463
0.998312												151.463
0.998312												151.463
0.998312												151.463
0.998312												151.463
0.998312												151.463
0.998312												151.463
0.998312												151.463
0.998312												151.463
0.717749												10.0984
0.665125												15.9401
0.624801												17.2137
0.614017												15.8425
0.619641												10.1016
0.625102												0.463424
0.617368												3.09659
0.598463												2.72174
0.57068												19.8093
0.544712												14.5358
0.504787												7.70113
0.464725												18.3088
0.419776												11.3921
0.368563												4.57511
0.322173												0.00981517
0.214015												5.20707
0.214011												5.19524
0.161915												6.42802
0.121836												6.87168
0.114711												0.744202
0.114643												0.836764
0.788879													132.874
0.813497													135.611
0.836641													155.358
0.849258													143.751
0.863079													120.476
0.873005													117.402
0.883974													113.962
0.897631													105.57
0.900192													106.986
0.901926													114.991
0.913414													120.188
0.933926													130.008
0.950267													132.239
0.958535													131.896
0.9639													131.597
0.961529													131.558
0.956995													136.707
0.955436													139.537
0.95344													153.957
0.962919													155.71
0.973184													156.101
0.976241													166.894
0.976454													174.436
0.975073													169.443
0.975672													175.351
0.970835													170.836
0.985478													166.434
0.990411													167.475
0.996438													172.544
0.997369													174.037
0.998981													179.468
0.999343													176.641
1													164.455
0.994858													166.569
0.99453													162.707
0.993763													166.209
0.967661													179.157
0.975003													175.225
0.987821													155.701
0.98964													153.982
0.990467													155.599
0.995213													161.95
0.991554													165.501
0.994875													165.039
0.997938													170.311
0.996664													176.862
0.998129													176.564
0.996073													177.403
0.984044													169.716
0.966232													134.175
0.95617													93.7215
0.952018													75.7965
0.951839													79.7676
0.951241													84.964
0.946332													99.3361
0.946443													81.2291
0.943192													57.5888
0.940288													45.6485
0.927936													19.2426
0.895315													7.59421
0.853895													7.72362
0.802717													12.3694
0.753642													3.20352
0.706727													4.35711
0.655414													5.46994
0.613276													11.5109
0.568541													6.94564
0.518964													10.9444
0.467492													13.9238
0.413101													4.92626
0.355461													9.24884
0.293494													4.32806
0.231589													8.81589
0.171456													5.76144
0.994136														163.475
0.985798														167.751
0.997189														167.931
1														173.942
0.981767														55.8805
0.972528														74.3406
0.974558														78.975
0.968859														51.6817
0.961683														41.2216
0.942826														38.09
0.932935														39.4153
0.92843														33.4278
0.929844														24.532
0.921775														13.0998
0.911598														5.54746
0.904512														0.184929
0.908814														10.1888
0.907697														22.9165
0.907681														32.4934
0.909739														19.947
0.906183														54.5097
0.900164														60.2563
0.897447														72.7877
0.891428														84.0739
0.885694														97.1363
0.882322														97.7669
0.885761														91.9939
0.888242														90.7124
0.888246														90.4388
0.887528														100.841
0.886064														107.215
0.887826														115.575
0.892448														134.739
0.900991														120.124
0.899177														118.755
0.905735														118.535
0.9148														132.116
0.928906														158.319
0.930741														158.636
0.928321														147.041
0.929572														156.858
0.923132														147.541
0.928667														157.122
0.918648														148.223
0.918331														149.116
0.918792														149.258
0.92771														159.4
0.923664														159.173
0.924939														160.376
0.918245														145.75
0.929664														174.652
0.944815														174.473
0.944956														166.681
0.951498														163.545
0.960793														160.679
0.971487														146.698
0.983537														144.96
0.982095														144.713
0.969489														65.8966
0.967049														84.2194
0.963837														44.9063
0.949153														38.2146
0.931526														41.2217
0.927225														40.0546
0.919742														26.4313
0.901866														10.5897
0.86455														11.1301
0.819664														6.96476
0.7576														13.2509
0.688262														15.8391
0.617989														20.77
0.539636														21.0102
0.473994														22.1335
0.392971														20.7542
0.323913														22.3102
0.252527														21.222
0.196683														6.54122
0.147242														2.79507
0.990501																								143.629
0.994866																								134.705
0.99455																								138.206
0.992227																								130.556
0.991292																								139.466
0.986464																								151.678
0.989354																								162.469
0.991124																								159.626
0.994761																								154.523
0.992683																								152.556
0.99804																								151.906
0.997954																								152.6
0.995704																								156.561
0.997599																								166.943
0.999622																								169.089
0.999588																								168.452
0.999121																								172.281
0.999615																								179.588
0.998775																								173.994
0.999541																								176.216
0.998167																								179.031
0.996181																								178.895
0.998952																								179.937
0.99966																								176.511
0.998146																								176.514
0.998063																								173.781
0.997943																								171.702
1																								159.524
0.995131																								152.078
0.990579																								150.589
0.989313																								148.613
0.989307																								151.036
0.988897																								159.392
0.988457																								163.169
0.986373																								144.015
0.981939																								89.2277
0.967653																								51.5493
0.944974																								33.1603
0.911299																								7.00473
0.868146																								2.68913
0.821641																								0.838777
0.760029																								11.5783
0.701577																								29.6292
0.646097																								29.1015
0.589053																								35.1913
0.529973																								41.2272
0.476937																								31.0977
0.422882																								18.2142
0.364947																								23.0116
0.302278																								15.1634
0.246748																								16.7685
0.197003																								13.4464
0.150794																								8.41669
0.119711																								10.3145
0.110517																								11.1198
0.104143																								9.96807
0.0899333																								9.68982
0.975346																									173.771
0.975403																									173.808
0.981473																									170.311
0.983122																									165.059
0.955965																									128.821
0.955801																									128.843
0.952136																									118.051
0.953366																									109.408
0.963282																									120.157
0.963217																									120.196
0.965928																									138.915
0.968141																									146.61
0.972854																									156
0.972807																									155.072
0.972894																									155.939
0.974989																									152.12
0.976791																									161.933
0.976726																									161.692
0.977967																									166.927
0.978093																									165.959
0.979529																									163.389
0.9798																									154.64
0.97718																									140.511
0.977699																									137.352
0.982457																									136.924
0.984153																									143.761
0.984398																									146.419
0.983799																									148.79
0.983126																									149.279
0.982729																									159.181
0.982408																									164.982
0.983379																									148.432
0.983398																									148.294
0.975337																									122.909
0.974356																									96.7235
0.976689																									90.4071
0.976687																									90.3855
0.968443																									91.2196
0.963539																									96.3208
0.968034																									107.003
0.968098																									107.131
0.971094																									109.108
0.974032																									124.733
0.969293																									103.244
0.969334																									103.248
0.967737																									100.133
0.971919																									101.173
0.974474																									96.8049
0.974414																									97.1158
0.976326																									99.668
0.976252																									108.899
0.981375																									111.481
0.981381																									111.481
0.983799																									108.445
1																									99.5186
0.995587																									77.0241
0.99607																									76.421
0.991233																									69.1637
0.979862																									76.7516
0.973981																									81.6561
0.975346																									80.071
0.973055																									94.17
0.979978																									100.95
0.979839																									88.1249
0.979827																									88.1122
0.980709																									82.2151
0.977226																									89.0171
0.977283																									88.9872
0.971953																									92.9965
0.972559																									71.4464
0.947505																									45.8695
0.948317																									43.0156
0.927381																									40.7033
0.901057																									45.2656
0.873939																									61.9148
0.873963																									61.966
0.863851																									68.6175
0.85905																									62.5684
0.837783																									68.343
0.837759																									68.4013
0.826024																									69.0545
0.820916																									89.8729
0.821064																									116.404
0.820951																									116.518
0.828012																									114.41
0.836191																									129.5
0.838667																									133.216
0.838623																									133.244
0.840957																									140.003
0.840352																									141.105
0.840313																									139.139
0.91769																										86.6097
0.918491																										92.6989
0.918119																										92.9679
0.918812																										88.3833
0.919776																										85.1139
0.919191																										84.7988
0.919367																										84.6064
0.921967																										86.9868
0.921385																										90.8374
0.921545																										94.1347
0.923841																										99.187
0.924875																										98.0363
0.92572																										110.69
0.92596																										114.793
0.926083																										116.998
0.925498																										119.846
0.927224																										126.168
0.927247																										126.108
0.927225																										120.912
0.927728																										115.602
0.927293																										115.831
0.927451																										116.521
0.93251																										124.365
0.938735																										130.57
0.942032																										126.983
0.946821																										129.545
0.953438																										128.58
0.95646																										131.348
0.956111																										125.797
0.961356																										124.888
0.975061																										127.328
0.989934																										133.001
0.99676																										132.269
1																										133.203
0.996359																										123.785
0.989344																										75.9494
0.980446																										43.1959
0.966304																										46.0451
0.948712																										41.0303
0.923482																										24.8473
0.897017																										26.9544
0.870338																										24.8325
0.843405																										30.0055
0.820298																										30.7507
0.79101																										24.5689
0.762032																										32.9621
0.738046																										29.7004
0.703391																										30.5265
0.672933																										33.5704
0.642367																										25.5421
0.605019																										28.4199
0.590278																										33.1625
0.580895																										34.9107
0.560913																										36.8652
0.538872																										36.9039
0.517359																										32.6613
0.497315																										39.6911
0.485413																										42.8015
0.478581																										42.9991
0.459106																										47.8792
0.433341																										49.5041
0.409219																										37.9816
0.381497																										26.4773
0.349322																										36.257
0.321907																										26.0834
0.2933																										19.2192
0.264159																										24.4555
0.23316																										31.7411
0.202721																										37.5397
0.178889																										43.0926
0.165062																										34.4209
0.152608																										29.2388
0.140073																										49.7447
0.128567																										63.9083
0.116211																										73.3007
0.119026																										74.8591
0.121387																										73.7801
0.121304																										73.4606
0.121148																										73.7741
0.121176																										73.4101
0.12148																										72.7345
0.12153																										72.5226
0.121463																										72.457
0.121474																										72.5558
0.121584																										72.4896
0.121591																										72.4676
0.12209																										70.6562
0.122332																										70.0123
0.121837																										70.9483
0.121898																										71.4979
0.122106																										70.7328
0.759194																											40.1601
0.74321																											59.3055
0.727594																											48.9789
0.705364																											40.7335
0.698862																											49.9058
0.698458																											67.2676
0.701844																											75.3212
0.701871																											77.3859
0.70133																											77.3276
0.700728																											73.1565
0.700684																											75.0879
0.701614																											77.4762
0.70287																											83.378
0.703373																											94.4838
0.696566																											88.5175
0.69145																											87.6993
0.693814																											95.5126
0.695257																											97.1329
0.691577																											97.4053
0.687708																											99.8423
0.688619																											100.432
0.691791																											107.184
0.693619																											112.676
0.697743																											110.022
0.695477																											102.418
0.689689																											94.973
0.683634																											71.5584
0.670976																											51.0479
0.646127																											53.3469
0.622398																											59.7635
0.602948																											67.9596
0.58843																											64.9259
0.571285																											63.8208
0.5526																											66.8906
0.545916																											74.2612
0.532424																											73.4503
0.516776																											69.4593
0.498129																											67.8015
0.47768																											54.5458
0.456124																											55.783
0.434007																											53.144
0.404065																											43.5339
0.373607																											47.2928
0.346479																											39.5361
0.320783																											47.6678
0.300169																											35.837
0.275182																											18.6384
0.244466																											19.2203
0.221883																											20.4786
0.216515																											18.4807
0.204291																											20.4069
0.195609																											20.0131
0.181901																											25.9747
0.167264																											29.2582
0.147465																											8.97284
0.138185																											14.3388
0.137468																											24.8931
0.137536																											17.0533
0.14234																											24.9903
0.137036																											36.0816
0.134747																											37.0037
0.133964																											39.0651
0.131003																											50.2298
0.11936																											50.0813
0.106694																											40.221
0.0928048																											30.9244
0.972183																												122.52
0.985656																												109.416
0.999792																												112.534
1																												119.581
0.996996																												112.403
0.991656																												96.0768
0.992468																												85.9194
0.98849																												87.3531
0.990473																												93.0192
0.995212																												98.9456
0.997301																												89.8483
0.993724																												87.2103
0.990883																												87.5038
0.991429																												85.8456
0.990922																												86.0466
0.988248																												81.6281
0.986187																												81.094
0.984914																												76.7185
0.987071																												51.3279
0.977135																												33.2072
0.957611																												30.294
0.935699																												31.9934
0.909008																												32.351
0.88925																												33.705
0.872599																												33.2815
0.856225																												29.0177
0.829464																												10.5192
0.79518																												7.51721
0.754353																												2.41665
0.717832																												9.88954
0.675239																												4.03813
0.633751																												11.7152
0.595779																												13.1573
0.556914																												19.2719
0.530795																												24.1588
0.502703																												32.4105
0.464345																												30.6558
0.42099																												29.7525
0.380527																												29.4477
0.336531																												27.9529
0.300528																												34.4214
0.264127																												35.5998
0.239157																												36.2046
0.21224																												33.0708
0.180686																												47.4148
0.157148																												55.219
0.14793																												45.7007
0.134796																												54.0315
0.128123																												64.6608
0.131679																												68.9672
0.137938																												80.7092
0.141156																												92.3922
0.1455																												107.184
0.146241																												115.608
0.142464																												129.668
0.143412																												133.965
0.145981																												144.309
0.157659																												142.338
0.171632																												136.018
0.192567																												132.033
0.203255																												132.696
0.210885																												134.885
0.22256																												143.845
0.245665																												143.881
0.266691																												146.246
0.280142																												145.376
0.296298																												147.948
0.311559																												146.253
0.317751																												149.284
0.321299																												150.841
0.330964																												141.626
0.335326																												142.231
0.334191																												154.489
0.33254																												160.224
0.331047																												160.999
0.333185																												159.333
0.335346																												151.772
0.333108																												141.687
0.33328																												138.358
0.333525																												127.413
0.332387																												127.85
0.33419																												116.643
0.33344																												115.246
0.332963																												116.164
0.331791																												122.562
0.311783																												139.324
0.290236																												166.161
0.304168																												147.541
0.313021																												150.041
0.322002																												144.113
0.333105																												146.105
0.868774																													97.8405
0.872561																													110.771
0.884466																													122.195
0.894419																													124.091
0.895778																													127.538
0.888754																													120.407
0.888371																													86.8075
0.889509																													86.0295
0.893141																													86.1604
0.893982																													92.3675
0.894223																													92.9135
0.89281																													87.4243
0.891943																													78.2833
0.892101																													78.7327
0.893198																													86.1781
0.894235																													104.46
0.899994																													114.879
0.906968																													113.644
0.913773																													122.919
0.919173																													128.452
0.924626																													131.364
0.933701																													126.152
0.939581																													136.402
0.948425																													120.291
0.949352																													102.233
0.951039																													107.49
0.961226																													106.08
0.969216																													101.135
0.971058																													99.6624
0.971266																													93.3751
0.972637																													104.327
0.975907																													102.932
0.977279																													104.214
0.979136																													114.351
0.986676																													110.265
0.98883																													120.21
0.98979																													124.779
0.991662																													123.775
0.992896																													120.37
0.991826																													123.541
0.991703																													125.14
0.991986																													120.089
0.992258																													133.712
0.992325																													150.299
0.991961																													161.443
0.993189																													163.568
0.997102																													164.062
0.998863																													161.827
1																													160.121
0.999849																													167.686
0.998666																													165.147
0.998667																													161.505
0.998387																													162.809
0.998376																													167.655
0.998891																													168.48
0.997859																													166.626
0.989597																													130.647
0.985138																													80.5219
0.983292																													73.2541
0.975899																													80.4616
0.979402																													72.894
0.976581																													73.3684
0.969601																													86.5451
0.971343																													82.9684
0.972213																													80.3891
0.969725																													73.2328
0.959801																													68.2986
0.950646																													61.6157
0.935911																													55.0635
0.920446																													49.6744
0.904526																													50.5848
0.891611																													56.2472
0.879031																													57.9958
0.864351																													68.0586
0.854604																													63.0174
0.838494																													65.0799
0.825266																													55.3945
0.809838																													50.946
0.788944																													32.7533
0.763418																													28.1362
0.741136																													34.2329
0.731753																													31.2041
0.715642																													32.5863
0.693031																													38.0415
0.669589																													38.512
0.6405																													34.6941
0.609585																													34.9993
0.586604																													46.7026
0.564411																													54.2216
0.547491																													60.2322
0.533118																													64.5446
0.86313																														69.4946
0.854182																														65.9358
0.82954																														77.1027
0.827182																														73.1868
0.818039																														48.1415
0.798182																														44.469
0.786673																														52.524
0.771786																														62.5845
0.75691																														58.2801
0.737672																														38.2237
0.689595																														30.555
0.64323																														23.8691
0.599457																														27.0096
0.553986																														32.5203
0.50932																														16.1868
0.459658																														0.413498
0.410777																														0.997946
0.365484																														0.978198
0.313448																														6.43624
0.282966																														6.81584
0.251973																														8.92745
0.229158																														5.73442
0.197696																														3.83482
0.171999																														0.89747
0.143684																														2.49521
0.13157																														3.7023
0.124744																														15.7376
0.116775																														23.5004
0.117847																														25.6075
0.119384																														21.942
0.114221																														27.5932
0.11039																														31.2574
0.991621																															151.432
0.991561																															151.827
0.991058																															149.286
0.991705																															150.845
0.991788																															150.475
0.991817																															150.321
0.99073																															149.301
0.989551																															149.189
0.987165																															151.746
0.989365																															153.414
0.991545																															152.302
0.996416																															156.078
0.995497																															160.324
0.993578																															163.754
0.994907																															161.564
0.997867																															163.882
1																															159.964
0.991383																															162.244
0.981942																															174.554
0.979049																															174.73
0.979064																															175.951
0.980933																															162.548
0.981425																															155.226
0.985888																															159.309
0.985548																															157.462
0.980881																															139.009
0.973277																															106.006
0.969677																															78.044
0.962404																															64.0428
0.956664																															26.8498
0.949345																															7.82985
0.938756																															1.99345
0.924313																															9.4042
0.918888																															20.1168
0.916144																															30.7604
0.914498																															38.904
0.912191																															33.5095
0.913392																															33.5633
0.912725																															26.9248
0.898084																															22.4516
0.876167																															19.3363
0.855095																															24.9241
0.851156																															23.9866
0.847945																															29.5244
0.84616																															35.9524
0.847735																															33.1357
0.840134																															20.5752
0.815257																															8.41664
0.795567																															15.8891
0.780818																															21.9787
0.75974																															18.4316
0.726508																															21.6095
0.684576																															15.8896
0.641387																															17.6378
0.620007																															34.6829
0.620263																															46.2894
0.624848																															69.7286
0.624837																															81.4279
0.623027																															70.3049
0.620038																															54.1682
0.614794																															37.8449
0.604775																															30.0084
0.589952																															22.742
0.563465																															23.0323
0.549055																															25.1937
0.537338																															36.1208
0.522256																															30.7374
0.50041																															24.4203
0.465069																															20.1924
0.425583																															19.4774
0.384174																															16.7552
0.340272																															12.4036
0.297764																															10.0615
0.255933																															9.62706
0.205713																															9.43706
0.161822																															8.06271
0.129747																															13.1543
0.111909																															17.4166
0.930392																																49.6937
0.910187																																49.513
0.897088																																47.0262
0.884539																																44.0845
0.889378																																29.4536
0.890135																																21.2675
0.891525																																49.4044
0.888522																																58.2712
0.888734																																46.6641
0.886933																																53.5402
0.886356																																65.8678
0.884957																																59.7347
0.885136																																49.3676
0.884967																																48.3455
0.88439																																46.3608
0.884155																																40.2848
0.883889																																38.2968
0.88392																																38.5153
0.884327																																39.843
0.884864																																41.5982
0.885191																																42.2105
0.885122																																42.9341
0.88506																																42.1241
0.884955																																41.6164
0.884436																																41.2547
0.884788																																41.9425
0.889779																																40.9927
0.892755																																11.9638
0.893513																																38.3669
0.890515																																44.6675
0.876782																																49.463
0.858476																																60.0267
0.84472																																62.3705
0.831604																																74.3749
0.829049																																81.2599
0.827713																																83.7115
0.830568																																78.0102
0.82458																																78.8744
0.821098																																77.3
0.821922																																79.6993
0.823521																																78.8301
0.823725																																74.7403
0.821854																																77.5158
0.822893																																68.1769
0.812916																																72.8132
0.802049																																75.5414
0.798206																																66.8815
0.788759																																58.6842
0.77702																																45.7425
0.771489																																45.71
0.769385																																32.2229
0.758488																																16.3491
0.750984																																5.83351
0.745502																																0.336453
0.739342																																2.96435
0.738654																																0.428044
0.740934																																6.57683
0.739063																																0.641418
0.742291																																0.0499845
0.744124																																21.9469
0.744092																																27.1464
0.743086																																28.6198
0.743813																																24.9239
0.743743																																24.135
0.743323																																24.5611
0.74432																																22.9015
0.744632																																23.2854
0.74497																																23.3022
0.745005																																20.1488
0.74361																																23.4562
0.743897																																22.4964
0.742806																																19.5085
0.743965																																19.512
0.743132																																17.5754
0.74074																																16.4701
0.741124																																8.76627
0.744295																																8.08813
0.743314																																0.840525
0.740945																																0.833172
0.742047																																0.866316
0.742656																																1.79851
0.746492																																9.22494
0.748339																																22.3432
0.747593																																23.9004
0.745001																																25.5429
0.745839																																23.2851
0.74548																																24.8156
0.745171																																27.1304
0.747516																																30.8945
0.746421																																37.368
0.745959																																40.8762
0.418176																																	66.7831
0.39387																																	58.3818
0.350262																																	58.9159
0.317786																																	62.3931
0.293782																																	53.1667
0.266979																																	65.2805
0.261518																																	60.4674
0.266462																																	55.5503
0.255857																																	53.3775
0.242196																																	44.3678
0.241838																																	33.6004
0.222227																																	22.5773
0.175471																																	15.8013
0.167126																																	0.984268
0.143841																																	7.39194
0.110015																																	13.8635
0.0703215																																	39.4473
0.0783822																																	36.8592
0.0846725																																	42.0567
0.0767078																																	52.8639
0.0770139																																	39.1714
0.0819294																																	42.1391
0.0853598																																	96.4393
0.0897681																																	129.493
0.15801																																	139.385
0.213293																																	158.85
0.405333																																	157.116
0.569984																																	155.788
0.606493																																	156.449
0.599754																																	167.887
0.938851																																		142.61
0.960722																																		139.431
0.976855																																		143.546
0.990764																																		137.322
0.99725																																		92.4261
1																																		80.9022
0.992564																																		84.5191
0.989102																																		85.4345
0.982886																																		75.5573
0.971613																																		62.5781
0.956877																																		59.6118
0.93331																																		26.6459
0.893946																																		25.1533
0.860742																																		20.7529
0.820477																																		25.1217
0.778471																																		25.867
0.743495																																		28.1241
0.714525																																		28.7592
0.723465																																		23.5722
0.734808																																		21.3006
0.735562																																		33.5931
0.729342																																		34.6277
0.709889																																		26.2979
0.68951																																		28.8294
0.664651																																		28.3664
0.642034																																		22.1757
0.627316																																		22.4177
0.625889																																		12.9217
0.624644																																		0.943159
0.622554																																		2.05067
0.620905																																		0.171771
0.623898																																		7.80498
0.627687																																		5.53914
0.635001																																		0.591754
0.641714																																		1.25093
0.643159																																		4.82394
0.644891																																		4.7923
0.645989																																		5.71158
0.646021																																		5.209
0.646192																																		4.89171
0.646197																																		4.25397
0.646798																																		4.58295
0.646175																																		2.37732
0.644942																																		3.83964
0.636652																																		8.69733
0.620057																																		9.75902
0.603082																																		12.1259
0.576992																																		14.5761
0.545448																																		17.2347
0.507621																																		13.3337
0.471112																																		10.0915
0.433278																																		16.0015
0.393776																																		12.932
0.355355																																		10.6673
0.322242																																		13.8147
0.293689																																		7.72273
0.274623																																		2.38798
0.266477																																		5.22126
0.264347																																		11.2162
0.250931																																		10.3806
0.236431																																		7.0988
0.978722																																			151.967
0.986344																																			153.157
0.994142																																			157.632
1																																			156.547
0.992286																																			166.055
0.981785																																			136.326
0.976549																																			89.3947
0.965699																																			70.6103
0.956279																																			73.6122
0.947325																																			72.5564
0.934588																																			72.4833
0.924747																																			66.0818
0.918125																																			69.2353
0.915828																																			68.3611
0.917255																																			72.6044
0.909898																																			58.2234
0.89216																																			58.283
0.876246																																			60.8599
0.857445																																			62.0771
0.836663																																			56.2626
0.815443																																			62.3469
0.800216																																			59.3707
0.779633																																			64.0489
0.765915																																			74.701
0.757678																																			68.6866
0.746575																																			75.3073
0.743865																																			71.9958
0.738842																																			83.997
0.741673																																			89.6754
0.7366																																			88.7403
0.738142																																			81.4486
0.733764																																			74.3272
0.720674																																			64.6586
0.708808																																			54.2196
0.69663																																			55.9358
0.687861																																			54.0773
0.66775																																			61.7714
0.658854																																			63.1698
0.647562																																			67.62
0.637134																																			74.2107
0.630852																																			66.5518
0.622398																																			71.3491
0.616917																																			65.8957
0.612108																																			55.3094
0.599992																																			35.6884
0.579414																																			31.0791
0.561388																																			23.7864
0.532135																																			27.1755
0.518863																																			25.2725
0.501674																																			37.9763
0.492137																																			51.5774
0.479197																																			52.5779
0.469318																																			47.5725
0.457252																																			48.8548
0.441814																																			45.3785
0.426994																																			48.6964
0.41402																																			46.5944
0.411365																																			45.9892
0.414156																																			41.5826
0.417297																																			15.209
0.410433																																			0.650183
0.394734																																			1.03619
0.37904																																			0.290868
0.358579																																			10.8118
0.347232																																			6.70325
0.34554																																			10.1637
0.340944																																			14.174
0.340864																																			13.4481
0.346128																																			1.03306
0.342781																																			8.84552
0.340723																																			14.5432
0.334938																																			23.758
0.316784																																			24.9191
0.285675																																			26.5936
0.252373																																			19.429
0.229104																																			24.2404
0.201344																																			14.6797
0.178607																																			16.8377
0.163613																																			8.18678
0.156751																																			5.53002
0.150037																																			5.05734
0.144688																																			4.83042
0.141967																																			1.11235
0.136256																																			0.942823
0.134088																																			2.20617
0.134064																																			3.81852
0.136047																																			5.25979
0.135315																																			15.9529
0.134982																																			22.217
0.1324																																			28.9584
0.132377																																			26.6156
0.979489																																				123.512
0.969825																																				59.334
0.954503																																				50.1153
0.953745																																				52.7374
0.959045																																				59.1411
0.960629																																				65.0662
0.96056																																				65.4901
0.960477																																				63.3531
0.967455																																				82.2231
0.974635																																				127.718
0.977695																																				135.869
0.976612																																				137.514
0.979931																																				128.27
0.984914																																				133.197
0.987944																																				145.999
0.989542																																				154.417
0.989484																																				155.452
0.99054																																				154.068
0.991147																																				154.517
0.992045																																				155.359
0.991288																																				155.792
0.991359																																				154.082
0.993262																																				156.426
0.994415																																				175.952
0.989181																																				173.766
0.985933																																				169.614
0.992788																																				175.063
0.995951																																				177.754
0.998526																																				178.731
0.999363																																				174.516
1																																				178.358
0.988346																																				161.663
0.977673																																				138.435
0.976227																																				69.6425
0.969674																																				69.2128
0.969863																																				80.2132
0.966108																																				81.4814
0.963622																																				69.3125
0.953605																																				72.5329
0.947873																																				75.5073
0.944915																																				81.4264
0.945575																																				86.0064
0.947237																																				86.6553
0.951734																																				86.6094
0.955829																																				81.5028
0.952518																																				80.8693
0.950328																																				66.1446
0.944521																																				64.2066
0.943059																																				78.129
0.939644																																				77.7406
0.935794																																				68.6115
0.935118																																				58.2976
0.932225																																				54.9112
0.928562																																				60.31
0.920036																																				65.4569
0.913327																																				62.492
0.911395																																				55.5171
0.912257																																				59.3337
0.913005																																				65.7119
0.912726																																				71.389
0.908603																																				72.3886
0.898527																																				56.7126
0.887784																																				58.655
0.880912																																				64.295
0.877464																																				68.8894
0.877475																																				73.8806
0.875549																																				74.3011
0.872627																																				80.0442
0.873919																																				95.1242
0.874425																																				92.7217
0.877045																																				100.862
0.884199																																				110.1
0.895224																																				118.945
0.89928																																				135.828
0.907175																																				132.465
0.911508																																				123.668
0.914317																																				121.074
0.917354																																				121.781
0.916755																																				119.365
0.916981																																				122.953
0.912947																																				139.506
0.908281																																				148.069
0.907214																																				148.274
0.908636																																				153.966
0.912088																																				154.897
0.912057																																				154.43
0.911234																																				156.688
0.913335																																				152.492
0.912607																																				150.941
0.912752																																				145.32
0.91418																																				142.129
0.881804																																					137.021
0.888707																																					135.062
0.892344																																					132.28
0.896007																																					131.447
0.899163																																					131.477
0.909603																																					134.48
0.92191																																					132.666
0.932548																																					130.678
0.943621																																					131.7
0.951299																																					134.214
0.961924																																					129.511
0.963025																																					114.596
0.969856																																					98.2533
0.973871																																					97.3933
0.980883																																					103.894
0.986851																																					107.048
0.997052																																					100.048
1																																					102.189
0.998339																																					88.3229
0.994943																																					70.4186
0.979564																																					65.7681
0.962503																																					62.5639
0.942709																																					76.0077
0.9291																																					73.2324
0.913871																																					63.9317
0.888694																																					48.5607
0.849612																																					32.9352
0.812222																																					2.18429
0.76794																																					0.697491
0.76829																																					15.8105
0.763426																																					8.73463
0.698947																																					0.549339
0.631235																																					4.5349
0.569812																																					2.54432
0.499096																																					2.03729
0.427925																																					3.03832
0.359439																																					3.88543
0.291507																																					6.63614
0.227235																																					6.32918
0.989685																																						10.5973
1																																						5.56744
0.997553																																						4.65049
0.992063																																						10.0045
0.948988																																						17.1564
0.878171																																						23.296
0.817122																																						24.844
0.719608																																						27.7991
0.615008																																						29.996
0.540907																																						36.7375
0.527605																																						32.7326
0.544116																																						28.3875
0.552196																																						47.3633
0.538369																																						54.3726
0.51608																																						39.6885
0.504757																																						26.259
0.475386																																						29.8978
0.450256																																						31.9117
0.403756																																						40.0336
0.403625																																						39.9185
0.394512																																						38.7324
0.442045																																						35.7943
0.500419																																						14.9234
0.501579																																						15.1313
0.500158																																						25.1352
0.415859																																						26.3573
0.320054																																						17.6621
0.237825																																						19.8364
0.189408																																						37.8559
0.196629																																						47.0087
0.2305																																						63.737
0.226754																																						88.1385
0.212103																																						112.244
0.229879																																						127.036
0.215406																																						139.842
0.222776																																						146.65
0.23777																																						135.594
0.2418																																						120.371
0.223771																																						115.849
0.205674																																						137.636
0.24352																																						150.428
0.294256																																						156.253
0.334517																																						153.245
0.362596																																						160.435
0.407335																																						172.102
0.452659																																						167.906
0.47757																																						161.103
0.489382																																						160.985
0.510895																																						149.263
0.506225																																						123.888
0.505912																																						112.475
0.542301																																						129.905
0.620353																																						134.383
0.622194																																						137.56
0.613772																																						137.651
0.6122																																						138.343
0.601771																																						141.252
0.592521																																						127.678
0.553076																																						115.271
0.528429																																						93.096
0.533055																																						94.5103
0.540704																																						104.93
0.535954																																						96.5492
0.519663																																						60.3399
0.433884																																						43.9186
0.395231																																						38.7599
0.364564																																						42.2876
0.329953																																						48.5025
0.333892																																						54.7444
0.325571																																						58.807
0.300061																																						75.8512
0.288766																																						97.8208
0.294625																																						99.6547
0.290933																																						93.7147
0.291686																																						80.9583
0.289952																																						87.8893
0.285329																																						103.343
0.291456																																						119.972
0.306387																																						138.741
0.329351																																						142.582
0.366937																																						141.311
0.387516																																						141.126
0.394206																																						140.594
0.399537																																						140.651
0.399596																																						135.617
0.386641																																						129.226
0.406845																																						128.94
0.392803																																						133.409
0.367243																																						134.032
0.309498																																						138.242
0.324035																																						144.99
0.961761															130.316
0.968218															126.541
0.981424															121.301
0.981317															122.786
0.989714															119.754
0.988937															126.028
0.995868															122.796
0.995497															126.182
1															111.283
0.984335															89.2747
0.976148															43.1104
0.950056															25.4067
0.917598															27.8819
0.871276															20.384
0.817981															13.2997
0.770977															1.1378
0.724196															7.94043
0.709882															40.4992
0.691085															52.0595
0.682164															47.7192
0.676038															43.4419
0.677259															39.1917
0.67394															3.2421
0.646083															9.49228
0.607125															15.8569
0.574943															14.6092
0.537684															12.191
0.504807															10.8336
0.465207															4.69925
0.436055															7.49562
0.407222															0.800115
0.376699															0.865363
0.349232															5.88098
0.321496															6.38585
0.296435															7.71266
0.271916															9.29341
0.246257															3.562
0.223907															9.05202
0.204857															1.6095
0.199976															6.84793
0.201299															9.07337
0.199315															15.5597
0.19947															13.2628
0.199461															13.5942
0.199801															13.6148
0.198938															13.0178
0.198993															13.0262
0.198316															13.2044
0.198881															12.4729
0.199331															14.0288
0.199397															14.1456
0.199146															14.1187
0.198351															13.3605
0.1988															13.1337
0.199279															12.9158
0.200355															6.68565
0.972649																58.7501
0.972415																59.0755
0.968254																53.3545
0.966026																52.5579
0.960586																43.9538
0.943279																121.362
0.928443																33.5812
0.899909																37.0613
0.874142																31.4043
0.837647																29.4846
0.804005																38.4738
0.775465																38.6057
0.743313																33.7448
0.708623																146.02
0.673061																0.614483
0.635801																6.20023
0.599327																6.4906
0.563217																4.74099
0.522084																15.2506
0.4873																16.4213
0.418057																23.1773
0.418108																23.2242
0.385473																23.9789
0.333815																21.4005
0.30896																22.4923
0.309101																22.5671
0.28628																31.9965
0.265063																41.2801
0.25413																39.5611
0.254244																39.5623
0.226495																51.6979
0.20835																46.7249
0.186009																32.1438
0.172103																32.0693
0.158709																41.6677
0.145232																42.5695
0.12626																42.6031
0.110479																47.2977
0.0971475																50.1335
0.0924005																56.6471
0.993776																	171.355
0.993388																	170.51
0.982882																	144.393
0.965722																	117.051
0.967173																	77.0364
0.957772																	76.1193
0.951128																	79.6554
0.951571																	78.0239
0.9423																	86.3157
0.942612																	86.7238
0.940359																	77.7136
0.935655																	67.1338
0.925437																	55.3228
0.897504																	40.9271
0.866343																	35.1024
0.825041																	29.6052
0.787919																	33.2499
0.743113																	23.8532
0.701291																	22.7941
0.655731																	14.7405
0.610997																	6.50415
0.564156																	1.93696
0.518791																	7.791
0.468899																	0.737989
0.444433																	10.1501
0.415377																	10.8295
0.376246																	5.66848
0.335375																	14.112
0.296696																	12.4289
0.244707																	14.9697
0.204983																	18.4552
0.187949																	0.899359
0.160394																	6.21865
0.135958																	0.345679
0.108646																	7.76947
0.0744926																	8.17804
0.0398498																	21.4569
0.969318																		110.672
0.972304																		119.247
0.975973																		127.502
0.97931																		140.692
0.984617																		149.22
0.98833																		151.737
0.995365																		157.61
0.996133																		160.957
0.996549																		161.69
0.998414																		159.262
0.995928																		156.928
1																		165.074
0.99344																		79.7446
0.994836																		77.5879
0.992967																		88.9543
0.994676																		166.804
0.987084																		153.655
0.969971																		133.227
0.967097																		81.0206
0.965938																		80.848
0.963594																		75.8239
0.957341																		71.8459
0.952778																		66.807
0.951561																		62.1492
0.951791																		55.0866
0.952087																		52.3463
0.951878																		53.6567
0.95142																		53.4804
0.950391																		53.4995
0.946265																		65.1709
0.935946																		66.6862
0.925277																		63.7459
0.916327																		72.1488
0.904327																		77.7765
0.896187																		76.8606
0.887874																		60.7529
0.865412																		46.035
0.836354																		31.0386
0.782471																		27.9281
0.7349																		17.1589
0.664434																		12.4914
0.589788																		6.16747
0.51506																		9.65052
0.443988																		7.33665
0.381011																		3.49963
0.29946																		5.42046
0.226161																		0.641752
0.158883																		4.69539
0.0990031																		3.39024
0.0758309																		3.05629
0.989448																			143.134
0.990019																			156.006
0.994096																			156.1
0.996357																			148.094
0.991939																			135.277
0.998381																			144.08
0.994975																			133.665
0.992207																			139.234
0.994499																			139.84
0.996674																			148.509
[truncated: 632 more rows]
[truncated: 7 more columns]

## Sheet: ED Fig 11C,D,F
	ED Fig11C,D					ED Fig 11F
		GFP	ArchT			Max speed
	Success	13	6			GFP	ArchT
	Fail	2	14			28.7739	14.9372
						18.3817	28.8304
						21.8818	24.8151
						23.8674	17.515
						16.6253	15.5231
						12.4438	17.5053
						26.9446	16.377
						17.1326	17.2761
						22.9565	14.1072
						16.437	22.2953
						18.595	19.3992
						14.8691	16.7976
						26.5472	13.1609
						27.8915	16.8257
						25.0231	27.1417
							17.9089
							12.8235
							17.7356
							7.3087
							14.9372

## Sheet: ED Fig11E
ED Figure 11 E
Time	GFP															ArchT
-1	1.28841	1.27314	0.0791297	5.78795	1.67693	0.700694	2.36178	8.87627	6.9283	1.2707	9.44016	0.336776	3.38235	14.8015	2.85241	3.64772	1.76753	9.39491	6.69388	5.95411	3.1457	4.32904	0.384665	3.82438	0.225312	9.08373	0.595699	3.17113	12.8235	22.2144	0.595699	12.1132	9.08373	3.17113	14.4897
	0.304351	7.60089	0.187758	7.1519	3.19808	1.01625	1.84081	12.1646	4.80372	4.11489	8.2799	0.0918266	5.41984	14.8014	6.98738	11.4628	1.66134	12.8972	3.49446	8.30935	0.184961	0.00199698	0.439478	5.84319	1.40497	2.6648	1.11128	4.1366	4.60783	22.8601	1.11128	10.5254	2.6648	4.1366	12.7922
	0.305076	7.9127	2.3297	10.3864	3.66804	1.65843	1.54987	10.0981	8.19997	5.03465	6.22114	0.188081	2.84064	13.6371	6.0291	9.83088	1.10067	9.1914	5.73634	10.1552	0.751421	3.11441	0.550753	6.63144	1.69566	2.2911	1.8024	4.21576	7.35857	27.1417	1.8024	6.42755	2.2911	4.21576	12.4616
	3.15177	4.37644	3.72728	14.9932	0.710055	1.17064	0.671933	12.3388	10.9033	3.33297	1.05367	0.332221	6.67457	15.2008	3.98534	9.10877	2.36586	8.74801	6.2291	11.4562	1.66814	3.43289	0.790496	7.76799	2.86562	5.29269	4.46472	4.30893	0.40363	18.1151	4.46472	3.46471	5.29269	4.30893	9.84466
	2.08988	6.81315	7.44873	9.79303	7.75722	0.0535165	4.74455	7.21715	7.05925	1.57532	1.25593	0.128696	10.3823	13.8448	2.82699	9.90712	1.42406	12.8512	7.53408	10.5256	1.49752	8.33321	0.0499146	7.67691	3.30684	4.29249	5.28422	6.40319	0.392543	16.8139	5.28422	7.16341	4.29249	6.40318	10.0584
	0.650813	6.67651	11.0861	7.02392	4.68657	0.304252	5.04217	8.488	4.54024	1.99672	0.747279	0.042981	9.3	11.7305	2.08108	8.61835	4.17297	11.6705	11.8314	4.67915	3.90098	0.00074768	1.43236	12.3886	3.22857	2.69741	6.22442	4.52031	1.09711	16.2367	6.22442	10.6454	2.69741	4.52031	13.6124
	2.90267	3.03116	11.2598	11.2762	6.62469	4.25175	6.80132	11.8294	3.66149	3.53005	1.2818	0.0169064	7.25767	6.5516	4.59862	6.98827	3.70701	11.5981	12.6409	4.29262	1.26866	6.01775	1.32861	12.2115	0.874274	2.11228	6.17649	2.81406	1.58334	13.2329	6.17649	11.4314	2.11228	2.81406	15.6105
	0.229787	6.48164	13.3635	12.8086	8.27606	6.08438	7.46152	11.1471	8.17538	4.49232	2.01429	0.196825	6.11991	7.96237	10.5011	6.75634	0.0458549	8.92659	14.0102	7.8897	0.376185	5.43905	2.08437	9.68127	2.22788	1.99569	11.3053	0.981467	1.46028	13.9717	11.3053	7.85497	1.99569	0.981467	14.1606
	1.10495	8.71722	14.4835	11.2547	8.82214	6.1679	3.87135	11.6218	7.55907	2.46727	2.01589	0.0419988	5.26325	5.45952	9.22311	5.70757	0.810181	2.57846	17.5053	9.43393	2.82218	2.25373	1.0495	11.7711	1.34314	1.56309	9.85247	0.726576	0.307536	8.7386	9.85247	9.57493	1.56309	0.726576	12.2865
	2.43783	12.8841	15.6719	5.26068	6.25312	7.05304	1.76687	13.0986	10.0993	2.01619	1.06116	0.809453	2.20707	2.51581	9.02246	6.89087	2.52128	0.0460953	16.2463	6.24404	3.69378	0.0457761	0.111016	9.54036	8.09587	2.20315	14.9908	0.29068	0.775876	7.40715	14.9908	6.59859	2.20315	0.29068	16.289
0	9.44269	13.0339	18.5593	3.01017	9.29057	8.45651	0.691237	8.47532	6.64879	2.54896	0.922358	0.505012	7.41737	7.14262	7.95307	3.66424	1.5036	1.09557	12.3096	7.54282	2.51947	3.39319	0.926311	13.9751	1.49167	3.43791	15.1707	0.783062	0.740763	11.7661	15.1707	4.59415	3.43791	0.783062	14.7907
	0.00131048	17.01	19.4264	3.47257	11.1248	5.22936	0.640019	9.00552	8.1869	0.501417	0.569806	0.517171	9.43737	6.83622	8.82853	5.99896	0.0241027	1.16719	7.58569	11.0365	2.35629	0.502118	0.369705	10.7864	1.17805	5.80422	22.7014	2.65583	1.02037	12.1557	22.7014	4.12283	5.80422	2.65583	10.2991
	3.97488	15.2888	21.0642	9.25888	11.65	3.62859	1.08565	10.3565	5.64174	0.712363	1.32094	0.2117	7.98649	6.57381	9.60639	5.84681	2.5068	1.23549	7.7022	11.9616	7.17683	2.22977	0.887564	8.32718	2.13798	7.39672	12.599	1.39471	0.264399	11.9253	12.599	2.98884	7.39672	1.39471	4.24509
	3.01273	9.84704	21.8225	7.63106	13.5123	4.59554	1.89726	7.98422	2.03669	1.09737	1.45742	0.241621	1.3677	5.16959	4.64306	2.59052	1.17573	0.805046	10.8032	0.949192	6.98565	0.0566226	0.533761	7.75882	1.84251	1.39118	10.9702	2.12734	0.542224	9.84881	10.9702	2.44526	1.39118	2.12734	1.40394
	2.30023	9.65804	21.8818	1.70989	16.8249	4.86728	1.44914	11.0329	3.68984	0.417473	0.293336	1.77811	0.548417	10.0728	5.67561	1.04641	12.4847	1.20774	2.57997	2.27656	0.977846	10.8537	0.0377223	4.68666	1.16029	2.28391	6.13866	1.98171	4.18755	6.62731	6.13866	2.94949	2.28391	1.98171	1.44348
	0.00674935	10.6963	20.4739	5.81131	12.9991	2.89805	3.88835	11.4528	2.72873	0.404446	1.85485	0.0217615	2.49589	12.0834	9.36099	3.11336	0.308457	2.77788	0.518854	3.82632	3.63725	6.07235	0.0458018	3.14974	2.0921	0.756475	13.8553	5.55834	7.15361	3.84888	13.8553	4.04871	0.756475	5.55835	2.32714
	2.36159	11.5934	21.321	6.55671	9.73391	1.34809	5.39592	14.4228	3.82474	2.25704	1.59629	0.950201	0.611203	12.3447	4.65666	1.38646	3.6138	3.32818	1.70275	2.31402	4.76018	1.87838	0.595614	2.80391	0.761521	0.111839	20.703	6.1653	6.74754	0.297586	20.703	3.20627	0.111839	6.1653	0.412937
	0.145994	15.4879	20.4122	6.26354	2.15941	2.6506	13.9032	13.3945	3.48159	0.809913	0.745984	0.348181	0.194541	14.2579	8.2753	1.03866	6.84751	3.5096	1.67916	5.36966	11.9933	0.696376	0.5432	1.24833	0.509012	0.0361748	26.5053	5.31543	11.3211	1.15796	26.5053	7.61005	0.036175	5.31543	0.985066
	0.818943	16.7844	18.2002	8.09802	0.693065	0.824861	16.1889	11.4378	2.73509	0.589369	0.282494	1.53151	0.281045	13.6507	6.80771	2.08624	11.4593	2.89574	0.329413	6.05353	1.99823	1.4791	1.01314	0.259193	0.5883	3.22871	27.8915	5.24795	11.3616	1.44318	27.8915	10.2881	3.22871	5.24795	1.69986
	0.00847138	14.1821	16.8802	11.3362	3.06965	2.82717	17.8187	14.7512	3.01524	1.27119	1.07385	1.084	1.82317	9.44394	8.35885	0.920866	0.0268927	1.1893	0.251284	5.05361	0.426063	1.11692	0.975648	1.35414	0.681156	3.09522	27.1546	6.25775	8.30607	2.91561	27.1546	14.7332	3.09522	6.25775	1.34637
1	10.356	17.742	13.5353	13.8555	16.6622	1.22587	15.2033	11.7959	3.14448	0.128204	3.43754	2.33102	5.39697	13.9586	4.26751	2.73541	3.22448	0.896593	0.142245	4.6074	0.320191	2.88407	1.23263	0.248822	3.90479	1.39226	24.393	6.33054	2.89753	6.2442	24.393	15.5101	1.39226	6.33054	1.61834
	13.8247	18.3817	10.9495	14.1895	20.3793	0.59142	17.1751	7.99332	1.18729	0.872472	2.43578	2.59439	7.64897	12.2662	8.99726	0.218861	0.96378	1.21092	0.534803	5.5387	1.38693	1.46997	2.20395	1.09707	2.85068	1.06328	17.7703	6.36499	2.18767	6.89553	17.7703	14.1395	1.06328	6.36499	2.65315
	15.588	15.2978	12.2759	11.4047	20.1016	3.76884	20.0271	6.68474	0.295847	0.770716	2.00248	2.94337	9.54972	9.02103	9.72994	1.00152	2.91099	1.58874	4.16198	5.61945	0.467486	2.34414	0.882427	0.0834854	2.3457	2.73501	8.45235	7.69207	0.787401	8.74537	8.45235	5.82249	2.73501	7.69207	0.512493
	19.1921	7.88879	7.56307	16.1407	26.0677	7.13867	22.2887	10.3094	0.448623	10.4134	0.729095	2.09849	12.0133	1.34065	6.4206	0.861335	0.0500901	0.599533	5.91369	2.07028	0.682656	2.60601	0.948088	0.312374	2.59049	4.09386	15.7218	14.5036	3.62164	6.90928	15.7218	2.15281	4.09386	14.5036	2.11654
	16.3441	10.2473	4.35003	13.5201	25.1213	7.56046	17.6699	4.68069	0.736965	6.86845	1.98239	0.706551	11.2551	1.46524	2.98351	0.95072	0.184099	0.907298	6.84921	1.43035	0.870809	3.80656	0.87936	0.26544	1.26731	1.73302	10.6044	12.9468	2.62355	9.77429	10.6044	0.765563	1.73302	12.9468	1.86792
	14.6635	13.3538	1.31694	10.3031	24.8758	9.28545	19.1274	10.6766	0.330395	0.772159	3.53808	1.1515	12.9157	0.34193	0.955036	0.109089	0.880202	1.03876	3.25113	2.23258	3.81207	3.99122	1.33691	0.701521	1.73124	0.75074	7.75247	10.8147	1.33285	8.07262	7.75247	3.83498	0.75074	10.8147	1.80852
	0.0251063	14.0137	0.560692	12.8849	23.5277	10.1005	22.9565	7.87363	0.490012	0.747197	9.20612	2.20629	7.15452	0.36961	3.22767	0.261614	0.961123	1.66082	2.54705	1.67191	7.81736	2.8962	0.995567	0.316159	2.93437	0.269092	7.9236	13.9021	3.21227	7.51253	7.9236	11.9238	0.269092	13.9021	0.747417
	28.7739	11.3727	1.37465	12.1713	26.9446	13.1691	20.586	2.13074	0.493807	1.482	9.28945	0.0606508	2.79941	2.47266	1.52377	0.764048	0.0346271	1.98951	2.046	0.487112	5.94482	2.23697	3.96817	0.165334	0.421259	0.818526	3.33331	10.7552	3.41204	0.607097	3.33331	13.1575	0.818526	10.7552	2.00555
	11.2972	5.70227	2.81515	10.8733	21.7918	13.0276	21.4721	3.50995	0.914158	2.45391	9.44584	0.517113	5.37434	3.90305	0.759368	0.728988	0.724154	1.56528	5.61566	0.921152	6.77967	3.5128	4.25025	0.174441	0.554995	0.339144	0.799425	10.2781	7.77506	2.47582	0.799425	14.4815	0.339144	10.2781	1.69621
	10.18	2.19505	3.69431	7.34156	17.7676	15.3874	30.5124	3.21067	0.111424	1.04331	6.6235	0.668913	6.82738	2.76366	3.75582	0.388836	0.660738	0.292003	4.10767	5.18785	4.69346	7.05319	1.32264	0.356359	0.762626	0.393123	0.334057	10.0081	0.0263645	4.79827	0.334057	14.1502	0.393123	10.0081	0.272869
2	12.5979	4.43006	1.51541	13.0515	16.2181	13.3531	16.7977	4.99393	0.187939	4.01978	1.59262	1.37107	14.7233	5.3083	3.62646	0.624266	0.826191	1.12557	2.52143	7.9291	4.01798	9.49369	0.981161	0.25054	0.582691	0.347165	1.20566	13.1662	2.50473	5.85448	1.20566	16.286	0.347165	13.1662	0.653647
	21.4071	9.80835	3.29047	11.3378	13.821	15.5571	16.121	3.99967	0.728451	6.32094	1.35735	0.825104	15.5929	6.22716	1.20435	1.01891	1.09245	1.40957	2.78105	9.47888	5.21389	7.92032	1.40434	0.0997379	0.312436	0.336652	1.41926	17.0977	6.91686	5.45876	1.41926	14.846	0.336652	17.0977	2.17723
	20.7754	6.29148	0.15589	10.8669	8.18102	15.5598	14.9134	0.713668	0.790672	11.3806	8.94739	0.533397	18.4917	4.01332	0.255177	1.22514	1.08424	3.46461	3.46064	12.063	4.31423	6.95333	0.328614	0.141666	3.34123	0.955942	2.05488	16.0836	7.50947	4.30706	2.05488	13.9642	0.955942	16.0836	0.761278
	23.7199	5.96769	3.9542	9.44685	6.36022	14.0353	18.7137	2.02189	3.31266	12.5074	7.24607	0.381269	18.773	4.40531	2.26963	0.524434	2.31332	2.83403	4.60859	9.35386	5.15586	3.63967	1.92938	0.426474	1.92095	1.40053	1.71425	20.0904	0.113817	3.09224	1.71425	13.8402	1.40053	20.0904	0.631782
	17.7737	6.89346	2.07093	10.6634	10.231	13.895	15.3623	6.3779	4.48875	13.5462	10.6166	0.0226888	19.4071	9.83287	1.14207	0.670032	4.82641	2.4903	3.31001	8.75869	0.725002	2.33619	0.146626	1.29858	3.38734	3.29932	1.34753	16.1099	5.28461	4.24037	1.34753	16.7976	3.29932	16.1099	1.45587
	18.5774	3.8812	1.39332	8.79393	8.64091	14.5888	13.3454	8.51815	2.0801	0.0609604	9.94064	0.308307	20.2809	12.3962	4.05999	0.191006	3.11987	3.33365	2.84515	6.71772	5.41022	0.908057	2.34047	0.187361	2.87378	2.17473	0.679927	13.9361	9.52341	3.59816	0.679927	10.8635	2.17473	13.9361	4.50563
	12.154	6.70165	3.27902	5.49508	11.0822	15.4274	12.5123	9.20854	2.72278	35.538	11.0868	0.518146	14.6917	8.22887	5.35616	0.235941	0.278202	3.22494	3.55257	10.5174	7.1678	0.770625	3.37208	2.85626	9.3132	3.37213	0.398534	16.8713	10.9678	1.08604	0.398534	9.93947	3.37213	16.8713	3.88638
	15.5661	6.08056	1.26363	8.49146	4.47531	16.1512	7.31195	15.1929	10.6057	5.28779	15.9276	0.510427	20.1466	1.34997	1.78946	0.909441	0.847894	2.2606	7.31996	13.4357	3.70046	0.502212	3.55641	1.22569	8.57137	1.41285	0.270128	13.8185	8.45926	0.315822	0.270128	7.59503	1.41285	13.8185	1.26358
	11.3334	4.28901	1.31314	11.7572	2.82027	17.0932	7.16656	16.437	3.2102	5.16632	14.0415	0.564212	19.2954	0.754877	2.35685	2.15374	0.281609	3.5841	15.4759	15.6594	1.0398	1.25029	3.32709	1.98866	1.80541	1.11433	0.472991	15.788	5.05644	1.41399	0.472991	8.06577	1.11433	15.788	1.41542
	7.32861	2.89059	1.82353	9.78787	1.50134	16.9319	2.02785	14.7108	2.38713	3.30669	18.1329	0.49588	19.5103	4.10091	0.323748	2.05921	0.738441	6.40594	14.8977	13.9799	1.04836	0.371125	3.55033	7.47245	0.962918	1.05111	0.540389	1.65732	0.983028	4.17849	0.540389	9.85784	1.05112	1.65732	2.74774
3	6.92994	0.572877	3.25785	12.3852	2.03796	14.6849	1.69335	16.3008	7.81776	1.55793	17.8285	1.01129	17.6648	1.85919	0.792403	0.565242	0.747498	7.35564	12.1239	16.4461	1.78682	1.50727	3.75826	9.73102	2.28971	0.440721	0.510098	1.9402	3.37139	1.62751	0.510098	9.14851	0.440721	1.9402	2.69847
	6.27758	0.274881	3.64845	9.87799	2.58663	16.0767	1.2991	13.6648	7.12466	0.903635	20.0183	1.35408	16.2966	1.72779	0.165455	0.0475792	0.652635	6.59353	11.9686	16.1357	2.14205	0.288312	4.55635	13.0176	0.789729	5.74244	0.699758	22.7583	2.88574	0.097568	0.699758	10.3801	5.74244	22.7583	0.990843
	11.65	0.0682309	0.39842	6.0418	3.08757	17.1326	8.4485	13.6851	11.0521	1.95399	22.9792	0.950031	16.0493	5.82664	0.233093	0.609251	0.00803164	4.90285	9.61768	15.0167	1.13457	0.237635	6.1361	15.072	0.934766	4.73376	0.636556	23.6141	3.10378	0.549426	0.636556	9.89825	4.73376	23.614	3.96998
	10.4095	0.185829	0.208514	3.6342	3.98051	16.1009	7.86298	15.972	13.3919	2.09708	22.2282	2.26099	12.0058	5.56034	1.80837	0.609379	7.37731	5.10246	10.9867	15.2402	4.90742	0.518703	2.29563	17.1274	1.05434	5.61883	0.285245	21.5886	3.03839	4.62511	0.285245	7.94378	5.61883	21.5886	6.76148
	1.89837	0.0153009	0.0909086	6.43884	4.81821	16.609	3.66895	15.0143	11.5062	1.99319	21.205	0.38828	12.565	8.49349	0.519423	1.66038	0.519795	1.42216	11.1769	12.2358	3.28402	1.04092	1.42067	18.8435	1.40426	9.36341	0.150235	24.6765	1.49932	5.43577	0.150235	6.62193	9.36341	24.6765	6.36948
	2.53688	0.51956	0.147111	1.26223	0.978939	16.8504	1.21246	15.8329	9.14289	3.03003	19.9109	1.29225	5.327	10.9375	0.464815	2.20263	10.9995	3.82767	11.0322	12.1217	2.75673	0.680186	1.04051	20.5319	4.1988	6.92218	0.649161	24.8675	0.766779	4.27665	0.649161	7.36066	6.92218	24.8675	9.51954
	0.602001	0.731735	0.067186	3.74954	2.57509	16.5228	0.212262	16.0931	13.5266	2.72371	21.464	2.43206	2.17725	11.2372	9.01495	10.6105	0.00939228	5.53181	12.0894	17.1071	1.92657	0.252856	1.01298	17.9465	7.24158	10.046	2.207	24.0641	1.57209	2.08381	2.207	12.5252	10.046	24.0641	8.67022
	0.321653	1.06583	0.0350037	4.31603	0.0954495	14.6622	0.598951	10.7658	12.5519	5.13376	20.5522	4.50483	3.83378	13.8638	2.54201	12.2514	6.41091	7.88029	14.1121	18.9256	1.62233	0.249274	0.559637	19.1949	9.05223	9.41594	0.172554	23.7461	0.798471	1.21637	0.172554	8.47851	9.41594	23.7461	6.94337
	0.0400203	0.20744	0.0720855	8.69576	0.574182	13.968	0.313255	14.9098	18.595	3.03251	21.1113	0.0238257	7.6871	12.4458	4.54724	15.6129	6.35043	10.6563	13.7543	18.1618	1.48137	0.0786477	0.447464	16.7363	3.25449	13.1609	0.0245967	22.801	2.28216	4.30611	0.024597	11.8883	13.1609	22.801	4.55451
	0.015019	0.664151	0.124639	10.3459	0.0455709	13.5078	0.597194	14.6508	10.6836	7.18788	18.9856	0.406861	7.89722	4.31295	0.664565	19.0595	3.15394	13.4091	11.7543	18.5407	0.439127	0.659388	6.25437	16.6661	3.84539	6.93221	0.123953	25.0231	2.39532	4.92743	0.123953	9.60528	6.93221	25.0231	5.55593
4	0.00501418	0.921196	0.0433602	8.13305	1.13027	12.3628	2.20845	11.9686	7.1453	8.22696	19.7982	2.09799	8.91062	5.1357	0.687642	20.5501	0.0263816	11.2388	14.3461	15.3489	1.16203	0.963735	9.82247	13.5004	3.1318	3.35624	0.325283	16.5181	4.90946	5.94444	0.325283	4.05981	3.35624	16.5181	10.2987
	0.246895	0.764175	0.237097	8.31439	0.772382	10.2875	1.05327	12.038	5.08774	11.403	17.2745	1.07215	5.39561	5.16118	2.14572	27.8505	1.32512	12.2092	16.7191	16.4745	1.09657	2.2036	9.28766	15.0717	1.19932	3.36311	1.87801	13.1572	6.0446	4.74786	1.87801	4.03772	3.36311	13.1572	11.4054
	0.375076	0.140305	0.167478	7.35266	7.85634	10.391	1.07077	7.93223	1.32228	13.7195	16.934	0.413907	0.457193	0.40468	1.36356	27.6326	1.93923	12.0868	15.5978	11.5154	0.411043	1.28884	1.9975	10.7547	3.0485	8.92408	1.81849	10.8769	4.68766	7.85484	1.81849	6.78222	8.92408	10.8769	15.8602
	0.450508	1.03069	0.334915	4.59652	11.5457	8.62677	0.14884	9.57532	3.79737	16.1315	10.1372	2.93881	2.1716	0.778777	1.19951	25.9564	3.91681	11.4497	14.7319	11.8919	0.245759	0.393422	1.81874	6.71791	1.88717	7.59104	0.146303	9.38575	3.59362	6.32211	0.146303	5.33619	7.59104	9.38575	15.783
	0.537585	0.49713	0.0638048	9.31232	3.82942	11.9879	0.225698	7.41324	2.94355	14.0962	7.31683	5.33013	3.28149	1.38584	1.04752	27.4345	0.0178515	12.8356	14.0204	14.6519	1.06839	0.393088	0.813482	8.30607	1.49129	8.21688	0.892306	3.45562	4.40838	4.84031	0.892306	5.50861	8.21688	3.45562	11.5408
	1.12455	0.445995	0.396987	13.3157	4.93689	11.9211	0.656309	1.66761	3.37432	1.68101	13.0544	8.45174	6.83399	2.54664	0.55984	28.8304	5.76469	12.5482	11.9253	14.5085	0.488858	0.767027	0.690497	11.6979	2.23184	12.4576	0.440812	2.27133	4.54095	5.29186	0.440812	9.41904	12.4576	2.27133	10.5902
	1.07072	0.234542	1.51497	11.1535	9.74739	12.0816	0.235339	2.21955	5.40165	3.7772	10.9434	5.47768	5.32775	0.87232	0.531055	25.4062	11.675	12.1311	10.2879	7.88534	1.5409	0.970277	3.2391	10.5326	2.47906	10.8721	0.980862	3.95393	2.46808	6.46113	0.980862	8.5425	10.8721	3.95393	5.92083
	0.138698	0.324123	0.339294	14.0362	7.82605	9.9123	0.204163	2.23125	4.24267	7.60966	6.64376	9.01188	1.90594	0.434531	0.742166	26.0317	21.3594	14.8954	12.8851	6.6251	0.775937	0.409802	10.6899	9.1278	3.4479	5.26264	0.227243	4.62506	3.09319	5.6901	0.227243	12.0229	5.26264	4.62506	1.60537
	0.229816	0.200611	1.74208	12.3838	6.56842	0.987743	0.140763	1.28475	1.94841	8.90199	3.46465	9.45978	2.35202	0.189099	4.6141	28.2959	0.0263401	13.5355	9.16516	5.80437	0.479005	0.0550127	8.47283	8.42491	6.30998	4.8507	0.423883	2.49477	2.08704	6.9283	0.423883	6.19416	4.8507	2.49477	1.28124
	0.207027	0.207993	0.393564	13.5711	3.88596	0.589603	0.255937	3.88205	2.59632	9.88834	3.33587	9.49543	0.802225	0.500529	6.26596	28.8023	9.23149	13.6925	2.13985	2.66585	0.44717	0.15834	6.41119	4.21281	3.87972	9.52997	0.619504	0.905585	1.5358	6.15336	0.619504	7.24932	9.52998	0.905585	0.787195
5	0.266603	0.398126	0.63535	10.1778	4.64414	0.365318	0.452718	4.04068	1.21704	16.4817	0.541409	2.37293	0.547073	0.873177	5.2665	24.6565	4.86266	15.5231	5.26952	2.94579	0.57845	0.517514	10.4277	2.46682	3.54484	3.38681	0.807013	1.78899	4.56547	8.05003	0.807013	5.26475	3.38681	1.78899	0.973799
	0.181572	1.1608	1.88334	16.6253	5.22523	0.4421	0.0639927	7.31513	0.62747	14.4319	2.16984	0.752841	1.42481	0.871875	9.36735	21.9815	10.2736	6.73114	4.72371	1.22996	0.226245	0.339724	14.6984	4.42734	3.80018	0.600427	0.515138	0.944234	8.43319	5.3829	0.515138	8.24544	0.600427	0.944234	0.888454
	0.261475	2.33581	1.81371	12.4378	2.0582	0.784471	0.242986	1.27546	0.535794	11.2071	1.7756	5.21803	0.693087	1.31063	6.22956	20.5516	0.0309655	5.36488	5.43988	4.72435	0.331063	0.440749	18.2377	3.32561	1.10431	1.27651	1.01549	0.155424	9.89395	9.06691	1.01549	4.77822	1.27651	0.155424	2.79829
	0.360574	1.17017	0.137257	14.0365	1.43233	8.16899	0.352546	1.56987	1.77338	5.00763	1.5069	7.06928	1.1584	0.921466	2.78988	13.7396	5.83412	7.97478	5.80863	0.630418	0.146296	3.03029	18.6516	2.13702	0.426275	4.07766	0.525998	0.0489569	0.274118	4.99873	0.525998	6.7949	4.07766	0.048957	1.36264
	0.346985	0.826632	0.414528	15.0901	3.1087	10.6307	0.165434	1.91259	1.43208	4.07253	1.1423	12.5876	0.516256	3.13104	3.37128	6.24804	16.9791	10.4533	7.94897	1.79179	0.360832	3.36714	9.75255	2.473	4.32768	7.43881	1.26391	0.351758	1.3043	9.48668	1.26391	8.90161	7.43881	0.351758	0.813635
	0.147042	0.105533	1.88234	13.8064	2.76576	11.1686	0.099965	2.14931	0.439141	5.17527	2.00167	20.5446	0.0733194	2.66641	0.0685148	4.52607	5.66182	10.6451	3.69874	0.417226	0.73999	0.452646	2.29465	0.419498	1.20734	6.91957	1.40879	0.334079	0.193416	8.8588	1.40879	7.6548	6.91957	0.334079	1.39943
	0.300952	0.83817	1.23773	12.5868	0.0615687	9.13947	0.0337087	2.4675	0.463827	8.40804	2.52139	25.8261	0.193781	2.31084	3.02853	7.8735	0.275224	9.29478	0.844784	1.15905	5.09523	1.5276	1.94129	0.941409	1.49855	1.27918	0.870959	0.191236	1.02022	7.57162	0.870959	5.45244	1.27918	0.191236	1.92678
	0.132917	0.100701	0.843346	14.7332	0.351727	2.97188	0.187904	6.64967	0.524265	9.57067	1.57614	17.707	1.21167	0.384013	1.87116	17.9794	5.3531	5.15016	1.82113	4.79583	2.64474	1.45531	0.94608	0.736895	1.20589	0.536608	1.98071	0.0571032	0.937108	8.72745	1.98071	1.85551	0.536608	0.057103	2.63524
	0.372818	0.0363078	0.844476	11.0041	2.6076	5.05863	0.741602	9.09914	0.159766	18.4487	1.09832	20.9751	0.243256	2.28045	4.24405	8.53035	16.3525	5.24816	2.56942	5.59869	5.58074	2.62587	1.67472	1.26146	0.110338	0.339106	1.36127	0.0124619	3.82737	7.81647	1.36127	1.14995	0.339106	0.012462	2.38058
	0.137833	0.226741	0.380114	5.8081	0.334362	6.77044	1.58854	7.37856	0.150747	0.0250876	0.816296	21.5622	0.117249	1.55727	11.1775	7.39819	7.84381	12.5368	4.84453	8.38969	9.63629	0.698586	2.20093	0.834901	1.19412	0.4385	0.902031	0.15871	2.7319	1.68032	0.902031	1.80047	0.4385	0.15871	3.08942
6	0.206106	0.303451	0.069577	3.11462	0.673322	3.20527	2.35816	6.30227	1.15949	10.1326	0.591637	16.4119	1.79537	1.17285	14.1742	5.16075	0.563826	13.9402	2.40751	4.76529	6.9894	0.0996468	2.3008	0.187774	1.49717	5.87423	0.601407	1.06695	8.21781	0.648904	0.601407	4.77763	5.87423	1.06695	6.42331
	0.347372	0.217369	0.027918	2.29178	0.875813	0.78724	1.34508	0.672498	0.568368	10.3112	1.7502	7.26916	0.519428	0.979735	17.5039	1.48809	6.41332	14.3726	1.04756	4.47919	5.06586	2.06551	4.24492	0.41095	2.68964	8.2916	0.262236	1.41545	5.24811	0.997853	0.262236	6.08927	8.2916	1.41545	8.14042
	1.57121	0.0801921	0.139296	5.4521	0.382857	0.0812846	0.305045	1.53887	0.41233	22.144	1.50731	10.4922	1.83573	0.544317	16.8028	3.25999	19.509	12.4838	1.67166	4.88947	8.00109	0.37151	6.47781	0.344187	7.34878	7.80923	0.575883	0.465435	2.96837	1.00373	0.575883	5.94131	7.80923	0.465435	8.57709
	0.215216	0.0888675	0.0232463	3.03636	0.643814	0.326916	0.48431	2.66816	0.881303	0.0388627	2.654	16.0719	0.472787	0.460388	16.2129	0.319321	12.6734	14.4799	10.5087	9.61784	7.53708	0.482343	11.8382	0.0584916	7.75452	8.49386	0.195137	0.423524	7.07033	1.43437	0.195137	7.76539	8.49386	0.423524	8.59089
	1.33718	0.897442	0.249055	1.91282	0.292186	0.214831	0.282169	0.506774	1.3963	8.09449	2.03673	15.932	0.546989	2.30527	17.567	1.30896	0.0050921	14.3388	11.2156	9.57829	5.25306	0.0879675	6.63121	0.23479	4.87509	6.85121	0.269155	0.312707	9.75678	0.484388	0.269155	4.38935	6.85121	0.312707	6.13938
	0.492734	0.0367975	1.69962	1.64839	1.1523	0.162307	0.296072	0.623906	2.37841	16.3735	1.22717	11.3637	0.878728	2.83182	14.4124	0.423706	9.7738	11.6491	7.44479	5.44918	7.58947	1.15547	5.04112	0.599592	1.33233	5.53777	0.249754	0.198926	5.75352	0.893473	0.249754	1.11183	5.53777	0.198926	7.08566
	1.67028	0.133564	1.78867	1.53189	1.64891	0.149074	0.0144059	0.483858	2.45656	0.00571853	0.493989	12.8568	0.723691	0.412163	15.6741	1.05679	16.691	12.8597	6.37712	7.05672	9.07414	0.804137	6.84704	0.147269	0.718855	1.89371	0.401077	0.948008	3.21889	1.47833	0.401077	1.87986	1.8937	0.948008	7.1825
	3.55967	0.136527	0.182844	2.33802	0.415305	0.120016	0.202412	0.897	1.53795	3.90423	0.32321	5.27139	0.123711	0.315112	16.9636	1.23782	0.0248742	14.6997	11.4992	5.81217	9.99814	0.573379	9.93625	0.158429	1.11186	2.52388	0.312876	0.301729	4.26573	0.005988	0.312876	0.708548	2.52387	0.301729	3.70813
	0.74226	0.184448	0.0915686	5.28144	1.19031	0.407075	0.226854	1.02268	3.11737	4.6948	0.919532	4.27814	0.276952	1.90431	17.6464	1.63522	8.23116	15.2399	5.69667	2.37935	11.831	3.45451	15.1908	0.366987	1.84238	2.15591	0.298176	0.538686	0.393951	0.664057	0.298176	2.23608	2.15591	0.538686	3.65724
	3.34207	0.112935	0.310197	2.94677	2.61746	0.723569	0.141437	0.928172	1.08758	15.9042	0.106385	1.42151	0.84785	0.0900196	18.6192	0.470274	9.22203	12.482	6.18025	1.50001	14.5874	2.06965	17.0979	0.710611	0.183549	0.986449	0.478147	0.355239	2.80182	2.43155	0.478147	2.90149	0.986449	0.355239	9.21183
7	1.04815	0.296024	1.0206	2.67826	1.02133	1.13223	0.118771	2.20891	0.631597	0.591071	0.187178	1.58017	1.40067	0.235791	19.8121	0.288199	14.6279	7.63214	4.73393	3.6907	11.5646	0.643171	18.187	0.227755	0.746832	1.7041	1.21829	0.379833	6.62094	7.19946	1.21829	0.785111	1.7041	0.379833	12.3681
	2.05341	0.885901	0.881392	1.29945	0.978016	1.63702	1.99303	2.73736	0.367615	11.6716	0.214596	0.827302	2.24208	0.660293	21.1945	1.02692	0.874486	4.86447	3.64984	1.67432	13.4802	3.01184	19.1987	0.435195	1.48016	4.07332	0.137093	0.460601	7.07334	0.031713	0.137093	2.6992	4.07332	0.460601	15.8142
	1.44126	1.04797	0.443811	0.326976	0.208837	0.524854	0.891344	1.34975	0.671358	10.3904	0.115874	3.26574	1.78131	0.187914	21.2252	1.34795	10.8947	6.68277	1.82889	0.476143	14.1539	3.19592	18.366	0.614639	0.770255	5.55507	0.562481	0.641062	3.84381	5.92989	0.562481	7.83218	5.55507	0.641062	12.8576
	0.44619	0.720681	0.518251	0.193677	4.83783	0.107561	0.212227	0.212181	0.810235	18.3843	0.186135	1.57895	1.03848	0.0170866	20.5883	0.738705	14.7103	11.1503	0.180786	0.640708	13.8663	3.5566	18.0562	0.438329	0.0383643	4.92418	0.446259	0.283438	0.919957	10.6282	0.446259	12.2441	4.92418	0.283438	16.8256
	0.520615	0.819031	0.339301	0.321031	5.32079	0.392976	0.339195	0.338118	6.70661	0.0679736	0.2063	0.086363	0.423961	0.154326	18.6321	2.31321	20.3082	9.46081	0.0495971	0.570684	14.8629	1.19587	21.61	0.953526	1.59534	4.55296	0.171388	0.728617	4.31331	14.5495	0.171388	13.3514	4.55296	0.728617	15.0089
	0.519918	0.388243	0.581298	2.9056	0.278505	0.992138	0.153036	0.584754	5.88227	6.41059	0.160657	1.80302	4.21301	0.592852	10.3693	2.07001	0.0153869	1.14041	0.401474	0.838961	16.377	0.866422	18.8576	0.531765	2.2872	2.8701	1.03608	0.680474	0.176073	0.107931	1.03608	9.1467	2.8701	0.680474	13.512
	0.259337	0.360079	0.0212144	3.29344	0.503396	2.93713	0.376019	0.66417	14.195	10.391	0.12408	0.909589	0.44366	0.626477	9.58516	3.06802	9.78982	1.09098	0.211066	0.842917	12.9652	0.384137	13.7901	1.77208	4.5639	3.37171	0.296175	0.726278	0.637263	9.41822	0.296175	11.4367	3.37171	0.726278	16.1909
	4.8455	1.99201	0.167577	1.57704	1.4786	1.82422	0.236342	0.564154	0.0270139	8.35933	0.0813437	0.00281693	0.575859	0.598925	11.2851	1.67386	6.90356	0.521349	0.125561	0.93877	10.2547	0.146322	7.97324	1.04697	5.49614	2.7518	0.140371	0.274571	3.47186	6.67552	0.140371	8.64104	2.7518	0.274571	11.927
	4.84503	2.32609	0.089261	0.941511	1.21819	2.36114	0.192142	0.155024	3.14775	0.293867	0.585017	8.63e-05	2.10826	0.388057	6.25697	2.61722	24.8151	0.190099	0.00975963	0.226319	10.4951	0.119879	7.09421	1.04091	3.36509	1.07593	0.0469919	0.611804	3.77955	15.6499	0.046992	5.90004	1.07593	0.611804	16.6161
	0.617404	1.74439	0.13492	0.667243	0.197692	0.441948	0.0916939	0.216961	1.79786	5.7371	0.415565	0	3.41122	1.3012	1.43832	1.03928	0.0118971	0.022132	1.44205	0.378791	11.8384	0.275441	4.93316	0.445217	1.61627	1.43409	0.0198951	0.236178	2.79412	0.035602	0.019895	4.05351	1.43409	0.236178	8.15177
8	0.307185	2.91105	0.163565	0.292951	0.611617	0.408174	0.0986812	1.12507	1.18468	3.37311	3.8918	0	1.77639	0.499154	0.462453	0.868422	11.1713	0.30902	0.158826	0.444159	10.3594	0.0705935	5.72808	0.474591	4.53063	2.8686	0.140327	0.493458	4.2277	3.88446	0.140327	2.9474	2.8686	0.493458	2.57672
	0.276797	3.66489	0.122063	0.351377	0.404128	0.480241	0.150518	3.18771	1.54664	2.68815	0.653877	0	1.02979	1.14168	1.44922	0.325303	3.03876	0.0530904	0.119243	1.75491	5.65806	0.191013	3.22696	1.49452	4.21166	2.68457	0.334314	1.67993	3.09772	6.70032	0.334314	2.00614	2.68457	1.67993	3.2555
	0.326908	1.17842	0.0427604	3.29453	0.425857	0.136653	0.110816	0.609562	0.357515	0.0310852	0.701353	0	1.21354	0.107819	1.86042	1.36936	6.24429	0.117354	0.259191	0.357244	8.98275	0.196204	2.53043	1.23698	5.15783	0.836831	0.71473	1.91718	2.73158	8.01842	0.71473	1.18614	0.836831	1.91718	10.3022
	1.01205	2.59204	0.0343704	3.87233	0.338211	0.0423108	0.0834642	3.79191	2.77299	1.82571	0.243935	4.73234	1.43591	1.43102	3.22567	1.34105	0.0515678	0.0340459	0.923759	0.234897	11.246	0.667187	1.27788	0.458431	4.89828	1.1405	0.282416	0.898584	1.94216	6.89349	0.282416	3.21104	1.1405	0.898584	9.47559
	0.28771	0.826783	0.115317	1.42123	2.11913	0.107216	0.175805	2.16881	0.761772	8.70239	0.0169164	0.0384932	1.31554	0.316288	4.97546	0.733633	4.63626	0.0530581	0.668186	1.28974	12.4462	1.61102	1.74423	1.00941	5.04151	1.6859	0.174587	0.308352	1.46092	8.28241	0.174587	0.920187	1.6859	0.308352	8.94994
	0.159257	0.420156	0.469749	0.103729	3.83995	0.0387612	1.30926	2.68941	0.00202067	9.00475	0.100235	0.122251	0.86506	0.792274	4.19924	1.53192	8.1487	0.0179744	0.373435	8.77098	14.0012	0.289256	1.64696	0.329169	3.59061	0.361693	0.201574	0.975692	1.502	4.78205	0.201574	0.132498	0.361693	0.975692	9.45927
	0.56611	0.218458	0.718237	0.278113	0.880204	1.71184	0.404629	0.326348	1.84337	0.00106822	0.220317	0.632182	0.162974	1.48277	0.648219	1.51696	1.16486	0.360287	0.044918	9.02154	14.022	0.955775	0.54303	0.190682	0.784793	0.515655	0.0686973	0.566217	2.70199	4.58066	0.068697	1.88566	0.515655	0.566217	4.07923
	0.333091	0.331923	4.07164	0.545388	0.791006	0.584676	0.536873	1.24311	0.230289	13.6144	0.180368	0.208293	0.621583	1.47578	0.42076	0.262057	0.0190989	0.145818	0.910175	7.09651	11.7994	1.10065	0.519297	0.129648	1.08227	0.915431	0.374739	0.674361	1.51914	5.23391	0.374739	2.09871	0.915431	0.674361	10.0149
	0.0242718	2.15317	1.27307	0.0260675	0.452113	0.107223	0.730592	1.43	0.250595	0.856903	0.492508	0.150558	0.157065	1.80856	0.605415	0.662128	0.982015	0.306717	2.22464	4.16354	13.1676	2.76298	1.2732	1.01514	0.205274	0.380345	0.0595024	0.193741	3.76547	1.06959	0.059502	2.09251	0.380345	0.193741	4.90343
	0.282583	2.85393	1.32681	0.0828579	0.955729	0.395602	1.6239	1.10704	0.144928	1.10603	0.274064	0.811204	0.136397	6.26295	0.499237	4.50719	0.78094	0.063866	1.56644	3.89819	15.6455	2.54286	0.167851	0.465961	0.107331	0.736744	0.311855	1.78753	7.9188	0.577535	0.311855	1.00516	0.736744	1.78753	0.887528
9	0.102214	0.497846	0.51362	0.920397	1.76033	0.266038	0.535419	1.56611	0.336824	0.0196336	0.45568	0.48701	0.117353	3.88105	0.340967	1.30936	0.188861	0.0859273	0.987886	7.15071	14.7352	0.191019	0.441298	0.428754	0.7089	2.7369	0.29229	2.80263	2.89471	1.16974	0.29229	1.52861	2.7369	2.80263	0.961343
