# Supplementary material for: Hippocampal-hypothalamic circuit controls context-dependent innate defensive responses
Source: eLife. 2022 Apr 14;11:e74736. doi: 10.7554/eLife.74736 (PMC9042231; doi:10.7554/eLife.74736)
Supplement: Figure 8—figure supplement 3—source data 1. — HPC→AHN pathway inhibition does not change anxiety-related behaviors. [file elife-74736-fig8-figsupp3-data1.xlsx]

## Sheet: EPM
ED Fig 12A
EPM Open time
	GFP											ArchT
Off	1.6	0.8	11.6	29.3	21.2	12.5	15.9	5.4	12.3	5.8		12.3	1	2.9	9.4	22.4	22.7	10.3	13.1	4.3
On	0	2.6	1.7	8.3	0.3	9.8	12.3	31.1	2.1	14.3		7.8	1.9	0	12.4	0	3.6	13.8	0	10.8
Off	0	10.7	0	0	23.1	9.2	24.5	0	7.9	2.6		2.5	0	6.9	9	3.2	0	7.3	9	1.8
ED Fig 12D
EPM Open entry
	GFP											ArchT
Off	2	2	1	3	5	6	4	4	2	2		1	1	4	5	6	5	2	4	9
On	0	3	1	3	1	6	2	5	6	4		2	0	2	0	2	2	0	6	5
Off	0	6	0	0	3	3	4	0	5	2		0	1	2	1	0	7	1	2	6
ED Fig 12 G
EPM Distance Travelled
	GFP											ArchT
Off	14.338	31.627	33.845	29.144	42.567	55.559	61.286	55.782	44.922	48.876		35.183	29.237	34.485	20.295	19.561	39.438	21.645	36.441	55.892
On	0.561	32.927	26.022	34.425	46.008	61.097	57.399	45.02	45.777	48.092		31.1	17.639	38.881	10.21	30.216	31.557	18.61	49.212	49.542
Off	10.893	23.881	14.99	10.113	36.17	35.699	37.688	46.734	46.76	34.2		14.241	27.518	29.354	14.196	15.391	32.32	11.01	28.127	41.846

## Sheet: OF
ED Fig12B
Center time
	GFP											ArchT
Off	7.1	4.7	0.1	6.2	5.3	9.1	2.9	4.2	8.5	17		5.1	12.1	5.9	2.4	5.5	3.6	18.1
On	3.7	6.8	9.5	27.2	12.7	15.2	0.9	19.5	10.7	50.1		9.1	7.4	25.9	7.2	17.7	11.9	1.6
Off	0	34.2	5.3	18.3	12.2	15.6	3.9	10.6	9.8	34		17.2	11.9	19.7	24.5	19.6	16.3	16.2
ED Fig 12E
	GFP											ArchT
Off	9	7	1	5	6	10	5	7	13	13		6	13	4	2	4	3	9
On	6	9	8	12	10	8	3	20	11	17		7	11	6	3	5	8	3
Off	0	17	2	5	5	11	5	11	14	10		5	6	8	9	5	6	7
ED Fig 12H
	GFP											ArchT
Off	11.9	13.896	10.854	6.224	8.357	11.903	14.523	10.349	12	13.768		12.963	13.141	5.918	5.845	3.497	8.465	8.621
On	10.346	15.153	11.109	7.205	6.776	9.817	8.232	9.176	10.385	8.141		9.492	9.666	5.686	5.626	5.471	9.115	7.044
Off	6.722	8.811	6.257	2.329	4.523	9.987	7.129	7.872	6.72	5.437		5.55	5.11	1.811	3.754	5.291	7.226	4.573

## Sheet: SUA
ED Fig 12C
SUA Open time
	GFP											ArchT
Off	30	13	22	5	6	12						13	10	19	12	28	9	8	11
On	30	22	0	11	4	6						19	10	13	0	20	20	6	13
Off	13	1	27	15	8	1						21	11	4	0	13	5	6	13
ED Fig 12 F
SUA Open Entries
	GFP											ArchT
Off	16	6	6	2	2	3						9	10	4	3	13	4	4	2
On	10	8	0	3	2	2						13	4	6	0	6	4	2	5
Off	8	5	10	7	1	1						6	8	2	0	2	3	4	4
ED Fig 12I
SUA Distance
	GFP											ArchT
Off	62.88	45.6	44.16	108.46	33.91	48.47						43.63	43.78	32.66	31.75	41.81	52.63	24.37	33.82
On	41.63	60.56	22.38	73.04	35.75	39.34						44.97	30.77	28.81	18.18	51.85	36.13	16.72	41.16
Off	44.15	35.54	42.46	64	19.15	26.1						36.71	20.18	18.41	0.96	26.53	23.63	14.35	32.37
